# Supplementary material for: Molecular Signature of Smoking in Human Lung Tissues
Source: Oxford University Press journal article supplement (doi:10.1158/0008-5472.can-12-1160), 2012-06-02
Supplement: 00085472can121160-sup-t1_xls_589k.xls [file 00085472can121160-sup-t1_xls_589k.xls]

## Sheet: Suppl.Table1.v2
probeID	probesetid	sequencesourceid	GeneSymbol	GeneName	wilcox.pvalue	FoldChange	wilcox.pvalue.ubc	FoldChange.ubc	FDR.wilcox.ubc	wilcox.pvalue.grng	FoldChange.grng	FDR.wilcox.grng	X7_HighlyReproducedProbeSets_Bonferroni	X599_ReproducedProbeSets_FDR	Laval_clusters	UBC_clusters	GRNG_clusters
X100121622_TGI_at	100121622_TGI_at	NM_182607	VSIG1	V-set and immunoglobulin domain containing 1	1.75e-07	2.20285	0.000426117	1.66455	0.00272343	0.0740991	1.56827	0.161423	0	0	NA	NA	NA
X100121623_TGI_at	100121623_TGI_at	NM_001031696	PLD3	phospholipase D family, member 3	1.17e-07	1.32397	0.0470687	1.13219	0.0777961	0.00155839	1.47273	0.0123712	0	0	NA	NA	NA
X100121633_TGI_at	100121633_TGI_at	NM_002115	HK3	hexokinase 3 (white cell)	2.44e-13	1.95741	0.00171289	1.30432	0.00718833	0.00465476	1.54449	0.0239271	0	1	U1	U1	U1
X100121642_TGI_at	100121642_TGI_at	AK091834		hypothetical gene supported by AK091834	2.97e-09	0.643821	0.117215	0.818498	0.159	0.55201	0.967989	0.680615	0	0	NA	NA	NA
X100121644_TGI_at	100121644_TGI_at	AW974207	NFYB	nuclear transcription factor Y, beta	4.57e-07	0.813561	0.709974	0.981541	0.735623	0.0320888	0.836036	0.0883194	0	0	NA	NA	NA
X100121664_TGI_at	100121664_TGI_at	NM_016337	EVL	Enah/Vasp-like	2.27e-09	1.34047	0.0125616	1.14838	0.0290014	0.000753789	1.2522	0.00791355	0	1	U1	U1	U1
X100121691_TGI_at	100121691_TGI_at	NM_003279	TNNC2	troponin C type 2 (fast)	7.7e-07	0.780982	0.0663322	0.921802	0.102537	0.402506	0.973439	0.542113	0	0	NA	NA	NA
X100121696_TGI_at	100121696_TGI_at	NM_000181	GUSB	glucuronidase, beta	4.75e-10	1.22942	0.103401	1.06607	0.144582	0.00256018	1.16751	0.0167713	0	0	NA	NA	NA
X100121719_TGI_at	100121719_TGI_at	NM_001032394	GPR126	G protein-coupled receptor 126	2.56e-09	0.733141	0.103915	0.926609	0.144736	0.823249	1.0358	0.889186	0	0	NA	NA	NA
X100121739_TGI_at	100121739_TGI_at	BC009944	STX6	syntaxin 6	4.76e-16	1.46277	0.0575926	1.12433	0.0912514	0.0103301	1.18197	0.0409613	0	0	NA	NA	NA
X100121783_TGI_at	100121783_TGI_at	NM_004701	CCNB2	cyclin B2	4.58e-08	1.69323	0.0130271	1.24952	0.0297353	0.13782	1.27932	0.249969	0	0	NA	NA	NA
X100121791_TGI_at	100121791_TGI_at	NM_015277	NEDD4L	neural precursor cell expressed, developmentally down-regulated 4-like	5.22e-11	0.765733	0.25842	0.936972	0.307339	0.0397198	1.28599	0.101662	0	0	NA	NA	NA
X100121797_TGI_at	100121797_TGI_at	NM_001029874		Rab15 effector protein	1.93e-10	0.720081	6.67e-06	0.72794	0.000217231	0.421328	0.944163	0.560905	0	0	NA	NA	NA
X100121803_TGI_at	100121803_TGI_at	NM_006809	TOMM34	translocase of outer mitochondrial membrane 34	2.48e-07	1.23573	0.796209	1.02642	0.815179	0.431008	0.927944	0.56862	0	0	NA	NA	NA
X100121822_TGI_at	100121822_TGI_at	AL834529	LRRK2	leucine-rich repeat kinase 2	4.33e-09	1.47353	0.00990654	1.14616	0.0245229	9.98e-05	1.62493	0.00318384	0	1	U2	U1	U1
X100121823_TGI_at	100121823_TGI_at	AF186252	SULT1C2	sulfotransferase family, cytosolic, 1C, member 2	3.49e-10	1.98344	0.00744591	1.34761	0.0199652	0.00137087	1.88904	0.0113874	0	1	U6	U1	U1
X100121830_TGI_at	100121830_TGI_at	AW117463	PKD1L1	polycystic kidney disease 1 like 1	2.56e-08	1.27014	4.59e-05	1.26879	0.000649151	0.0114202	1.17871	0.0432519	0	1	U2	U2	U1
X100121858_TGI_at	100121858_TGI_at	AK123835	C6orf138	chromosome 6 open reading frame 138	1.28e-08	1.42997	2.79e-05	1.40048	0.000479188	0.274115	1.13812	0.411866	0	0	NA	NA	NA
X100121861_TGI_at	100121861_TGI_at	NM_145918	CTSL1	cathepsin L1	4.02e-07	1.25115	0.0297259	1.12031	0.0548093	0.0397198	1.12497	0.101662	0	0	NA	NA	NA
X100121871_TGI_at	100121871_TGI_at	NM_006646	WASF3	WAS protein family, member 3	3.71e-10	0.666298	0.234395	0.930636	0.283048	0.648925	0.964251	0.755322	0	0	NA	NA	NA
X100121873_TGI_at	100121873_TGI_at	U12778	ACADSB	acyl-Coenzyme A dehydrogenase, short/branched chain	6.89e-10	1.50539	6.84e-05	1.28199	0.000819872	0.0397198	1.27276	0.101662	0	0	NA	NA	NA
X100121877_TGI_at	100121877_TGI_at	NM_001012507	C6orf173	chromosome 6 open reading frame 173	1.39e-11	1.45294	0.000104188	1.28181	0.00106414	0.284058	1.12509	0.421122	0	0	NA	NA	NA
X100121883_TGI_at	100121883_TGI_at	NM_198516	GALNTL4	UDP-N-acetyl-alpha-D-galactosamine:polypeptide N-acetylgalactosaminyltransferase-like 4	5.58e-07	0.766366	0.00638554	0.836035	0.0178496	0.927501	1.01084	0.959351	0	0	NA	NA	NA
X100121915_TGI_at	100121915_TGI_at	NM_018242	SLC47A1	solute carrier family 47, member 1	4.59e-09	1.61083	0.0127728	1.27697	0.029342	0.000276376	1.66506	0.00476343	0	1	U2	U1	U1
X100121956_TGI_at	100121956_TGI_at	ENST00000319246	DDHD2	DDHD domain containing 2	3.67e-11	0.825928	0.858101	0.995583	0.870525	0.0261978	0.926082	0.0766201	0	0	NA	NA	NA
X100121973_TGI_at	100121973_TGI_at	NM_032814	RNFT2	ring finger protein, transmembrane 2	3.28e-07	1.39678	0.00117519	1.25774	0.00537255	0.642406	1.01932	0.752626	0	0	NA	NA	NA
X100121985_TGI_at	100121985_TGI_at	NM_033168	B3GALNT1	beta-1,3-N-acetylgalactosaminyltransferase 1 (globoside blood group)	1.28e-10	0.659225	0.00193073	0.828236	0.00781753	0.0414152	0.819765	0.104282	0	0	NA	NA	NA
X100121991_TGI_at	100121991_TGI_at	NM_001005377	PLAUR	plasminogen activator, urokinase receptor	1.13e-10	1.75943	0.000296404	1.44143	0.00210421	0.0120105	1.51899	0.0449123	0	1	U4	U3	U1
X100121996_TGI_at	100121996_TGI_at	AK093136	KIAA1919	KIAA1919	2.48e-09	1.3309	0.03597	1.11256	0.0631091	0.579048	1.04701	0.700553	0	0	NA	NA	NA
X100122001_TGI_at	100122001_TGI_at	NM_002986	CCL11	chemokine (C-C motif) ligand 11	9.75e-08	1.82114	0.0035614	1.47728	0.0118578	0.215347	1.28121	0.344449	0	0	NA	NA	NA
X100122004_TGI_at	100122004_TGI_at	NM_014879	P2RY14	purinergic receptor P2Y, G-protein coupled, 14	3.06e-07	0.787255	0.298523	0.9482	0.34797	0.452969	0.983428	0.58939	0	0	NA	NA	NA
X100122019_TGI_at	100122019_TGI_at	NM_000399	EGR2	early growth response 2 (Krox-20 homolog, Drosophila)	9.19e-08	1.69647	0.00117213	1.45326	0.00537255	0.149505	1.47059	0.264175	0	0	NA	NA	NA
X100122026_TGI_at	100122026_TGI_at	ENST00000357508	NCRNA00082	non-protein coding RNA 82	3.12e-11	1.65675	0.458868	1.0533	0.501503	0.9934	1.04109	0.995253	0	0	NA	NA	NA
X100122038_TGI_at	100122038_TGI_at	NM_001910	CTSE	cathepsin E	2.96e-09	1.86954	0.110091	1.31644	0.151054	0.127027	1.58544	0.235834	0	0	NA	NA	NA
X100122077_TGI_at	100122077_TGI_at	BC146799	EML4	echinoderm microtubule associated protein like 4	8.55e-15	1.63214	0.00601158	1.19529	0.0170708	0.0146433	1.26982	0.0514671	0	0	NA	NA	NA
X100122107_TGI_at	100122107_TGI_at	NM_144682	SLFN13	schlafen family member 13	2.86e-07	0.819084	0.0116371	0.869992	0.0272773	0.118794	0.856008	0.224033	0	0	NA	NA	NA
X100122114_TGI_at	100122114_TGI_at	ENST00000355167	EYA4	eyes absent homolog 4 (Drosophila)	1.77e-07	0.624042	0.00514105	0.725823	0.0154136	0.0776894	0.738987	0.166153	0	0	NA	NA	NA
X100122133_TGI_at	100122133_TGI_at	DQ890878	CYBB	cytochrome b-245, beta polypeptide	2.08e-15	2.32967	8.7e-06	1.60316	0.000257344	0.000174604	1.82166	0.00402842	0	1	U6	U2	U1
X100122178_TGI_at	100122178_TGI_at	NM_000715	C4BPA	complement component 4 binding protein, alpha	6.76e-11	1.62909	0.00368861	1.23353	0.0121558	1.03e-06	1.90107	0.00066272	0	1	U7	U2	U2
X100122215_TGI_at	100122215_TGI_at	NM_206900	RTN2	reticulon 2	5.34e-09	1.4124	0.204592	1.07906	0.253616	0.000276376	1.57086	0.00476343	0	0	NA	NA	NA
X100122237_TGI_at	100122237_TGI_at	NM_021871	FGA	fibrinogen alpha chain	1.41e-12	5.68089	4.77e-05	3.24701	0.000659239	0.000703777	3.14271	0.00774154	0	1	U6	U2	U1
X100122239_TGI_at	100122239_TGI_at	NM_014640	TTLL4	tubulin tyrosine ligase-like family, member 4	8.63e-09	1.29019	0.246441	1.05979	0.295271	0.315219	1.03897	0.454361	0	0	NA	NA	NA
X100122240_TGI_at	100122240_TGI_at	NM_004181	UCHL1	ubiquitin carboxyl-terminal esterase L1 (ubiquitin thiolesterase)	6.11e-11	2.08464	0.00119905	1.54632	0.00545069	0.0319308	1.28357	0.0883194	0	0	NA	NA	NA
X100122259_TGI_at	100122259_TGI_at	NM_015920	RPS27L	ribosomal protein S27-like	1.14e-12	1.40062	0.0104438	1.1621	0.0253658	0.000371641	1.3301	0.00537129	0	1	U3	U1	U1
X100122272_TGI_at	100122272_TGI_at	NM_001181	ASGR2	asialoglycoprotein receptor 2	3.01e-07	1.55235	0.420474	1.11558	0.466021	0.0335032	1.29458	0.0910461	0	0	NA	NA	NA
X100122276_TGI_at	100122276_TGI_at	NM_005539	INPP5A	inositol polyphosphate-5-phosphatase, 40kDa	1.34e-12	0.801243	0.000667146	0.878403	0.00371139	0.0124605	0.891159	0.0464474	0	1	D2	D1	D1
X100122296_TGI_at	100122296_TGI_at	NM_001003803	ATP5S	ATP synthase, H+ transporting, mitochondrial F0 complex, subunit s (factor B)	2.84e-10	1.27007	0.0606725	1.07699	0.0952496	0.00337162	1.20917	0.0196505	0	0	NA	NA	NA
X100122312_TGI_at	100122312_TGI_at	NM_001081976	ADORA3	adenosine A3 receptor	4.57e-16	3.11562	0.00232563	1.74783	0.00875644	0.0397198	1.6273	0.101662	0	0	NA	NA	NA
X100122317_TGI_at	100122317_TGI_at	AY358204	TMEM92	transmembrane protein 92	3.28e-10	1.48325	0.000945553	1.25423	0.0046456	7.19e-06	1.74849	0.00115927	0	1	U2	U1	U2
X100122330_TGI_at	100122330_TGI_at	AI097119	RDH10	retinol dehydrogenase 10 (all-trans)	2.61e-08	1.44717	0.000376562	1.291	0.00248701	0.284058	1.16239	0.421122	0	0	NA	NA	NA
X100122332_TGI_at	100122332_TGI_at	NM_032552	DAB2IP	DAB2 interacting protein	7.34e-09	0.829131	0.000570407	0.876796	0.00333048	0.0834535	1.12439	0.17511	0	0	NA	NA	NA
X100122336_TGI_at	100122336_TGI_at	NM_001531	MR1	major histocompatibility complex, class I-related	4.26e-13	1.581	4.22e-06	1.28726	0.00015806	2.28e-05	1.4257	0.0017496	0	1	U2	U3	U1
X100122341_TGI_at	100122341_TGI_at	NM_144707	PROM2	prominin 2	4.2e-09	1.30285	0.588313	1.06181	0.622499	0.635604	0.995701	0.747431	0	0	NA	NA	NA
X100122375_TGI_at	100122375_TGI_at	NM_006832	FERMT2	fermitin family homolog 2 (Drosophila)	8.56e-10	0.829407	0.000144442	0.897679	0.00129156	0.0643304	0.909312	0.144788	0	0	NA	NA	NA
X100122391_TGI_at	100122391_TGI_at	NM_005949	MT1F	metallothionein 1F	1.35e-09	1.44048	1.98e-05	1.33226	0.000387055	0.00514313	1.60494	0.0254238	0	1	U5	U3	U1
X100122400_TGI_at	100122400_TGI_at	NM_133265	AMOT	angiomotin	1.93e-08	0.784355	0.0207252	0.875023	0.042011	0.0281219	0.805997	0.0808537	0	0	NA	NA	NA
X100122413_TGI_at	100122413_TGI_at	CR738950			4.45e-08	0.777121	0.286177	1.04994	0.3354	0.940656	1.00876	0.965521	0	0	NA	NA	NA
X100122440_TGI_at	100122440_TGI_at	NM_001747	CAPG	capping protein (actin filament), gelsolin-like	6.29e-13	1.59238	0.00088411	1.21358	0.00448737	0.00012425	1.49842	0.00362877	0	1	U3	U1	U1
X100122450_TGI_at	100122450_TGI_at	BC018396	KIAA0408	KIAA0408	4.96e-08	0.746677	0.208657	0.926589	0.25788	0.0365013	1.38064	0.0964394	0	0	NA	NA	NA
X100122464_TGI_at	100122464_TGI_at	ENST00000312002	WDFY4	WDFY family member 4	1.44e-07	1.28921	0.00780035	1.13755	0.0206918	0.000429707	1.27001	0.00589339	0	1	U4	U1	U1
X100122466_TGI_at	100122466_TGI_at	AK055032	RAP1GDS1	RAP1, GTP-GDP dissociation stimulator 1	1.01e-10	1.22457	0.359317	1.02604	0.406629	0.0462444	1.11112	0.113775	0	0	NA	NA	NA
X100122468_TGI_at	100122468_TGI_at	ENST00000290607	STARD9	StAR-related lipid transfer (START) domain containing 9	7.88e-14	0.679242	0.000613804	0.854012	0.00350599	0.0836159	0.849675	0.17511	0	0	NA	NA	NA
X100122470_TGI_at	100122470_TGI_at	AK123325	RGS12	regulator of G-protein signaling 12	1.2e-06	1.40089	0.001379	1.24094	0.00611801	0.502203	1.12357	0.637495	0	0	NA	NA	NA
X100122494_TGI_at	100122494_TGI_at	BM991750			2.36e-07	0.663765	0.515477	0.982907	0.554502	0.0806094	0.728647	0.170587	0	0	NA	NA	NA
X100122505_TGI_at	100122505_TGI_at	NM_052941	GBP4	guanylate binding protein 4	9.65e-11	0.627683	0.00396984	0.764415	0.0127438	0.9934	0.952615	0.995253	0	0	NA	NA	NA
X100122520_TGI_at	100122520_TGI_at	CN368271	UBE2F	ubiquitin-conjugating enzyme E2F (putative)	4.56e-15	1.34663	0.504583	1.02289	0.544085	0.089942	1.09999	0.184145	0	0	NA	NA	NA
X100122557_TGI_at	100122557_TGI_at	NM_006449	CDC42EP3	CDC42 effector protein (Rho GTPase binding) 3	5.55e-10	1.23757	0.000791659	1.146	0.00419657	0.951948	0.986753	0.974385	0	0	NA	NA	NA
X100122583_TGI_at	100122583_TGI_at	AK023660			1.68e-08	1.36188	0.0339036	1.11835	0.0599733	0.980203	1.02249	0.987557	0	0	NA	NA	NA
X100122603_TGI_at	100122603_TGI_at	NM_014848	SV2B	synaptic vesicle glycoprotein 2B	5.4e-08	1.48836	0.00200034	1.3295	0.00798898	0.450742	1.07173	0.587204	0	0	NA	NA	NA
X100122612_TGI_at	100122612_TGI_at	AB072905	FOXO3	forkhead box O3	3.14e-07	0.825262	0.0136829	0.896133	0.0307317	0.534478	1.03694	0.664336	0	0	NA	NA	NA
X100122613_TGI_at	100122613_TGI_at	NM_001001994	GPM6B	glycoprotein M6B	1.03e-10	0.714132	0.0247159	0.854287	0.0477573	0.470968	0.937427	0.606929	0	0	NA	NA	NA
X100122642_TGI_at	100122642_TGI_at	NM_020353	PLSCR4	phospholipid scramblase 4	4.6e-07	0.768144	0.299437	0.951976	0.348775	0.221636	0.896395	0.351888	0	0	NA	NA	NA
X100122687_TGI_at	100122687_TGI_at	BX647782	NUTF2	nuclear transport factor 2	4.35e-09	0.772639	0.00270207	0.86944	0.00973047	0.912667	1.02999	0.951874	0	0	NA	NA	NA
X100122693_TGI_at	100122693_TGI_at	NM_024709	C1orf115	chromosome 1 open reading frame 115	7.78e-09	0.742932	0.00246078	0.82465	0.00913719	0.924556	0.986997	0.959351	0	0	NA	NA	NA
X100122703_TGI_at	100122703_TGI_at	NM_198859	PRICKLE2	prickle homolog 2 (Drosophila)	9.28e-10	0.774818	0.00030297	0.862373	0.00212817	0.823249	0.984839	0.889186	0	0	NA	NA	NA
X100122806_TGI_at	100122806_TGI_at	AI862445	TNFAIP2	tumor necrosis factor, alpha-induced protein 2	5.1e-08	1.32443	0.202504	1.09562	0.251404	0.0126269	1.30778	0.0464474	0	0	NA	NA	NA
X100122813_TGI_at	100122813_TGI_at	NM_002754	MAPK13	mitogen-activated protein kinase 13	6.79e-11	1.41193	0.190769	1.08563	0.239054	3.28e-05	1.52122	0.0018051	0	0	NA	NA	NA
X100122823_TGI_at	100122823_TGI_at	NM_004573	PLCB2	phospholipase C, beta 2	8.92e-10	1.39492	0.00418961	1.15878	0.0132254	0.0268967	1.2265	0.0781678	0	0	NA	NA	NA
X100122831_TGI_at	100122831_TGI_at	AY305384	ASAH1	N-acylsphingosine amidohydrolase (acid ceramidase) 1	2.13e-07	1.31577	0.00181576	1.18856	0.007499	0.00122188	1.55676	0.0107014	0	1	U1	U1	U1
X100122838_TGI_at	100122838_TGI_at	CF553052			3.72e-16	1.76735	3.66e-05	1.30474	0.000569809	0.00661703	1.20932	0.0301224	0	1	U2	U1	U1
X100122843_TGI_at	100122843_TGI_at	NM_004612	TGFBR1	transforming growth factor, beta receptor 1	1.44e-07	1.32961	0.00823795	1.11963	0.0214987	0.228053	1.12113	0.35942	0	0	NA	NA	NA
X100122844_TGI_at	100122844_TGI_at	BM671447			1.72e-07	0.828041	0.33003	0.955367	0.378132	0.221636	0.879588	0.351888	0	0	NA	NA	NA
X100122883_TGI_at	100122883_TGI_at	NM_002350	LYN	v-yes-1 Yamaguchi sarcoma viral related oncogene homolog	2.02e-09	1.285	0.00981531	1.12985	0.0243907	0.00023763	1.4011	0.0044528	0	1	U5	U2	U1
X100122908_TGI_at	100122908_TGI_at	BC036424			2.71e-09	1.22971	0.000765107	1.14467	0.00412365	0.0528906	1.13354	0.126178	0	0	NA	NA	NA
X100122909_TGI_at	100122909_TGI_at	ENST00000372244	TMEM53	transmembrane protein 53	3.07e-10	1.35087	0.18506	1.08366	0.232987	0.00100329	1.34248	0.00940003	0	0	NA	NA	NA
X100122923_TGI_at	100122923_TGI_at	NM_198474	OLFML1	olfactomedin-like 1	6.46e-07	0.815996	0.344635	0.952606	0.392217	0.73441	1.03992	0.823592	0	0	NA	NA	NA
X100122954_TGI_at	100122954_TGI_at	BC047481		hypothetical LOC401022	8.5e-07	1.21466	0.0266292	1.14617	0.050455	0.000146987	1.70832	0.00384705	0	0	NA	NA	NA
X100122967_TGI_at	100122967_TGI_at	NM_001002901	FCRLB	Fc receptor-like B	5.69e-11	1.9057	1.56e-05	1.50784	0.000343627	0.0866933	1.22426	0.179492	0	0	NA	NA	NA
X100122975_TGI_at	100122975_TGI_at	AJ238994	ADAP2	ArfGAP with dual PH domains 2	1.26e-06	1.30684	0.739593	1.01352	0.762299	0.020453	1.31354	0.0642494	0	0	NA	NA	NA
X100123033_TGI_at	100123033_TGI_at	NM_000923	PDE4C	phosphodiesterase 4C, cAMP-specific (phosphodiesterase E1 dunce homolog, Drosophila)	2.26e-07	1.61861	0.0301905	1.29771	0.055255	0.00788617	1.55103	0.0343414	0	0	NA	NA	NA
X100123038_TGI_at	100123038_TGI_at	NM_000459	TEK	TEK tyrosine kinase, endothelial	5.54e-12	0.700221	0.00302007	0.860933	0.0105686	0.348497	0.907704	0.486869	0	0	NA	NA	NA
X100123040_TGI_at	100123040_TGI_at	NM_001098497	SGSM1	small G protein signaling modulator 1	5.38e-08	0.771444	0.260367	0.933766	0.30954	0.357146	0.930902	0.494451	0	0	NA	NA	NA
X100123064_TGI_at	100123064_TGI_at	L26985	CYP3A5	cytochrome P450, family 3, subfamily A, polypeptide 5	1.09e-06	0.709766	0.0742469	0.839989	0.111407	0.849099	1.02197	0.906475	0	0	NA	NA	NA
X100123070_TGI_at	100123070_TGI_at	NM_005392	PHF2	PHD finger protein 2	2.89e-11	0.830051	0.0919724	0.972839	0.131863	0.939477	1.00789	0.965521	0	0	NA	NA	NA
X100123110_TGI_at	100123110_TGI_at	NM_002627	PFKP	phosphofructokinase, platelet	6.32e-07	1.2949	0.635541	1.03632	0.668958	0.276599	0.918776	0.413487	0	0	NA	NA	NA
X100123115_TGI_at	100123115_TGI_at	NM_003601	SMARCA5	SWI/SNF related, matrix associated, actin dependent regulator of chromatin, subfamily a, member 5	6.6e-09	1.29876	0.00414652	1.09657	0.0131279	0.0365013	1.21451	0.0964394	0	0	NA	NA	NA
X100123132_TGI_at	100123132_TGI_at	NM_004673	ANGPTL1	angiopoietin-like 1	5.54e-10	0.679863	0.00138191	0.792186	0.00611801	0.0931708	0.852187	0.188857	0	0	NA	NA	NA
X100123138_TGI_at	100123138_TGI_at	NM_203304	MEX3D	mex-3 homolog D (C. elegans)	3.86e-08	0.820235	0.664135	0.978782	0.694294	0.637044	0.937065	0.747431	0	0	NA	NA	NA
X100123145_TGI_at	100123145_TGI_at	ENST00000369579	BCL2L15	BCL2-like 15	1.65e-08	1.31815	0.511927	1.03519	0.551451	0.967011	0.916755	0.980395	0	0	NA	NA	NA
X100123150_TGI_at	100123150_TGI_at	NM_001013836	MAD1L1	MAD1 mitotic arrest deficient-like 1 (yeast)	1.26e-06	1.28568	0.325938	1.02574	0.373976	0.00053236	1.35519	0.0066493	0	0	NA	NA	NA
X100123156_TGI_at	100123156_TGI_at	NM_004049	BCL2A1	BCL2-related protein A1	9.76e-14	1.84225	0.000786994	1.28278	0.00418562	0.0102446	1.3624	0.0409613	0	1	U2	U2	U1
X100123193_TGI_at	100123193_TGI_at	NM_021021	SNTB1	syntrophin, beta 1 (dystrophin-associated protein A1, 59kDa, basic component 1)	3.91e-15	1.60922	0.0400301	1.13599	0.0685531	2.18e-05	1.47904	0.0017496	0	0	NA	NA	NA
X100123204_TGI_at	100123204_TGI_at	NM_013267	GLS2	glutaminase 2 (liver, mitochondrial)	2.46e-12	1.53659	0.000289567	1.30156	0.00207223	0.0217562	1.39452	0.0671649	0	0	NA	NA	NA
X100123296_TGI_at	100123296_TGI_at	AK055335			1.28e-09	0.756308	0.000709947	0.830968	0.00390471	0.328996	0.900497	0.470432	0	0	NA	NA	NA
X100123301_TGI_at	100123301_TGI_at	CA314541	GPR110	G protein-coupled receptor 110	3.57e-16	2.73534	1.69e-06	1.99815	9.22e-05	0.00486276	1.84179	0.0243743	0	1	U7	U1	U1
X100123323_TGI_at	100123323_TGI_at	NM_000299	PKP1	plakophilin 1 (ectodermal dysplasia/skin fragility syndrome)	5.32e-08	0.608673	1.68e-05	0.657054	0.000356071	0.00268712	0.60932	0.0172517	0	1	D2	D2	D1
X100123362_TGI_at	100123362_TGI_at	NM_030760	S1PR5	sphingosine-1-phosphate receptor 5	2.54e-07	0.632214	0.0706388	0.801316	0.107492	0.127936	0.796217	0.236568	0	0	NA	NA	NA
X100123369_TGI_at	100123369_TGI_at	NM_023068	SIGLEC1	sialic acid binding Ig-like lectin 1, sialoadhesin	1.58e-09	1.62144	0.00188622	1.30427	0.00766226	0.00438649	1.53137	0.0229881	0	1	U4	U1	U1
X100123380_TGI_at	100123380_TGI_at	NM_031286	SH3BGRL3	SH3 domain binding glutamic acid-rich protein like 3	4.23e-07	1.20545	0.143862	1.04472	0.187796	0.00717026	1.21742	0.0319195	0	0	NA	NA	NA
X100123410_TGI_at	100123410_TGI_at	N92876			1.46e-10	0.628648	0.0568433	0.84646	0.0906063	0.613557	0.888866	0.72702	0	0	NA	NA	NA
X100123417_TGI_at	100123417_TGI_at	NM_015346	ZFYVE26	zinc finger, FYVE domain containing 26	2.21e-08	1.25186	0.0330145	1.09818	0.0588734	0.209487	1.09522	0.33742	0	0	NA	NA	NA
X100123437_TGI_at	100123437_TGI_at	NM_016931	NOX4	NADPH oxidase 4	9.24e-09	0.741336	0.739856	1.05995	0.762326	0.053766	0.777647	0.127699	0	0	NA	NA	NA
X100123443_TGI_at	100123443_TGI_at	BF432251	CDH13	cadherin 13, H-cadherin (heart)	4.56e-08	0.691424	0.314781	0.91694	0.364026	0.142562	0.771622	0.256261	0	0	NA	NA	NA
X100123446_TGI_at	100123446_TGI_at	NM_032206	NLRC5	NLR family, CARD domain containing 5	4.04e-07	0.773021	0.000393156	0.805646	0.00257549	0.154337	0.894117	0.270635	0	0	NA	NA	NA
X100123464_TGI_at	100123464_TGI_at	ENST00000296289	TKT	transketolase	1.08e-08	1.4197	0.366983	1.05567	0.414141	0.00213176	1.40937	0.0149688	0	0	NA	NA	NA
X100123493_TGI_at	100123493_TGI_at	NM_198212	CAV2	caveolin 2	5.58e-13	0.761893	0.106156	0.935366	0.147347	0.32334	1.1325	0.462756	0	0	NA	NA	NA
X100123614_TGI_at	100123614_TGI_at	NM_181784	SPRED2	sprouty-related, EVH1 domain containing 2	2.02e-09	0.794473	0.221368	0.943206	0.270566	0.980203	1.01132	0.987557	0	0	NA	NA	NA
X100123618_TGI_at	100123618_TGI_at	BC041400			3.06e-09	0.767701	0.00880705	0.817737	0.0224922	0.74692	1.07658	0.832984	0	0	NA	NA	NA
X100123640_TGI_at	100123640_TGI_at	NM_014266	HCST	hematopoietic cell signal transducer	9.96e-11	1.43773	0.00237775	1.18406	0.00888007	0.000320802	1.42862	0.00511854	0	1	U2	U1	U1
X100123645_TGI_at	100123645_TGI_at	NM_006774	INMT	indolethylamine N-methyltransferase	1.72e-09	0.801074	0.000147817	0.811423	0.00131244	0.0794314	0.921078	0.169766	0	0	NA	NA	NA
X100123667_TGI_at	100123667_TGI_at	NM_144580	C1orf85	chromosome 1 open reading frame 85	2.16e-13	1.49093	0.105425	1.08952	0.146523	0.00306378	1.36879	0.0185962	0	0	NA	NA	NA
X100123681_TGI_at	100123681_TGI_at	NM_015981	CAMK2A	calcium/calmodulin-dependent protein kinase (CaM kinase) II alpha	1.48e-08	0.764944	0.0487778	0.923376	0.0799648	0.203035	0.900636	0.330515	0	0	NA	NA	NA
X100123700_TGI_at	100123700_TGI_at	DQ893266	ACSL5	acyl-CoA synthetase long-chain family member 5	6.66e-13	1.33713	0.0205081	1.12158	0.0416494	1.45e-06	1.4689	0.000668695	0	1	U6	U1	U4
X100123705_TGI_at	100123705_TGI_at	NM_018425	PI4K2A	phosphatidylinositol 4-kinase type 2 alpha	3.18e-12	1.43235	1.51e-05	1.22435	0.000343266	7.19e-06	1.3945	0.00115927	1	1	U2	U2	U3
X100123706_TGI_at	100123706_TGI_at	NM_020828	ZFP28	zinc finger protein 28 homolog (mouse)	2.48e-07	0.790345	0.049874	0.896487	0.0813893	0.0431702	0.800156	0.107775	0	0	NA	NA	NA
X100123718_TGI_at	100123718_TGI_at	ENST00000266517	ETNK1	ethanolamine kinase 1	6.93e-09	1.40811	0.00117519	1.1689	0.00537255	0.888166	1.02393	0.935477	0	0	NA	NA	NA
X100123723_TGI_at	100123723_TGI_at	M81592	GGCX	gamma-glutamyl carboxylase	1.33e-07	1.23324	0.264711	1.04972	0.314009	0.0397198	1.18386	0.101662	0	0	NA	NA	NA
X100123730_TGI_at	100123730_TGI_at	NM_005532	IFI27	interferon, alpha-inducible protein 27	6.99e-11	0.791753	0.0328732	0.889807	0.058796	0.534916	1.06702	0.664624	0	0	NA	NA	NA
X100123803_TGI_at	100123803_TGI_at	NM_013314	BLNK	B-cell linker	1.23e-07	1.32529	0.00152244	1.2409	0.00657661	0.144787	1.22265	0.258531	0	0	NA	NA	NA
X100123807_TGI_at	100123807_TGI_at	NM_016580	PCDH12	protocadherin 12	4.45e-08	0.709967	0.00892879	0.820816	0.022785	0.797585	0.939042	0.871691	0	0	NA	NA	NA
X100123838_TGI_at	100123838_TGI_at	NM_017438	SETD4	SET domain containing 4	3.11e-08	0.813253	0.0934945	0.933946	0.133569	0.00883112	0.851566	0.0369645	0	0	NA	NA	NA
X100123846_TGI_at	100123846_TGI_at	AF165531	GGA2	golgi associated, gamma adaptin ear containing, ARF binding protein 2	8.16e-09	1.34065	0.00466259	1.15597	0.0143392	0.0399015	1.18669	0.101662	0	0	NA	NA	NA
X100123853_TGI_at	100123853_TGI_at	AF017635	STK39	serine threonine kinase 39 (STE20/SPS1 homolog, yeast)	7.75e-08	1.2449	0.0172627	1.14991	0.0365316	0.901253	1.01929	0.944937	0	0	NA	NA	NA
X100123860_TGI_at	100123860_TGI_at	AK025100			1.12e-11	1.2901	0.000803306	1.1334	0.00422358	4.28e-05	1.3592	0.0019691	0	1	U2	U1	U1
X100123873_TGI_at	100123873_TGI_at	BF526220	TNS1	tensin 1	3.45e-09	0.805244	0.538063	0.963923	0.575756	0.912667	1.0192	0.951874	0	0	NA	NA	NA
X100123912_TGI_at	100123912_TGI_at	NM_017734	PALMD	palmdelphin	2.36e-12	0.699969	0.00466259	0.835485	0.0143392	0.0431702	0.845077	0.107775	0	0	NA	NA	NA
X100123973_TGI_at	100123973_TGI_at	BT007214	MYOZ2	myozenin 2	5.87e-07	0.805917	0.0477446	0.867661	0.0785506	0.816168	1.0124	0.885098	0	0	NA	NA	NA
X100123982_TGI_at	100123982_TGI_at	NM_170743	IL28RA	interleukin 28 receptor, alpha (interferon, lambda receptor)	5.29e-10	1.41014	0.00691763	1.263	0.0189804	3.28e-05	1.66034	0.0018051	0	1	U1	U1	U1
X100124023_TGI_at	100124023_TGI_at	NM_203371		fin bud initiation factor	1.04e-09	0.49385	0.00429909	0.737633	0.013518	0.0836159	0.772788	0.17511	0	0	NA	NA	NA
X100124040_TGI_at	100124040_TGI_at	NM_021648	TSPYL4	TSPY-like 4	1.95e-08	0.830361	0.853646	1.00121	0.867098	0.00107356	0.78768	0.00977425	0	0	NA	NA	NA
X100124045_TGI_at	100124045_TGI_at	ENST00000369709	RAP1A	RAP1A, member of RAS oncogene family	4.46e-10	0.759924	0.0299271	0.890803	0.0549828	0.0347798	0.865112	0.0937039	0	0	NA	NA	NA
X100124088_TGI_at	100124088_TGI_at	NM_021732	AVPI1	arginine vasopressin-induced 1	1.6e-09	1.33538	0.0138333	1.17101	0.0310006	0.299374	1.10876	0.437986	0	0	NA	NA	NA
X100124092_TGI_at	100124092_TGI_at	AK000215	PGPEP1	pyroglutamyl-peptidase I	1.63e-15	1.47959	0.200483	1.05099	0.249289	0.191452	1.12776	0.318231	0	0	NA	NA	NA
X100124107_TGI_at	100124107_TGI_at	BC002457	DERL1	Der1-like domain family, member 1	7.29e-14	1.31829	0.00627654	1.117	0.0176521	0.00794871	1.22563	0.0343414	0	1	U6	U1	U1
X100124113_TGI_at	100124113_TGI_at	NM_020856	TSHZ3	teashirt zinc finger homeobox 3	2.8e-09	0.778199	0.000352894	0.840702	0.00236954	0.00523506	0.796332	0.0257204	0	1	D1	D1	D1
X100124137_TGI_at	100124137_TGI_at	NM_138437	GPRASP2	G protein-coupled receptor associated sorting protein 2	1.58e-09	0.813885	0.180636	0.952705	0.22813	0.0965397	0.902645	0.193392	0	0	NA	NA	NA
X100124179_TGI_at	100124179_TGI_at	NM_005308	GRK5	G protein-coupled receptor kinase 5	3.37e-11	0.775	0.000447131	0.836944	0.00279283	0.0311929	0.819227	0.0872696	0	0	NA	NA	NA
X100124186_TGI_at	100124186_TGI_at	ENST00000292392	FCRL3	Fc receptor-like 3	6.14e-07	0.588667	0.363088	0.85329	0.409889	0.0721025	0.66551	0.157337	0	0	NA	NA	NA
X100124248_TGI_at	100124248_TGI_at	ENST00000361972	SFMBT2	Scm-like with four mbt domains 2	2.19e-10	1.41685	0.000248471	1.24412	0.00188873	0.159284	1.11565	0.276601	0	0	NA	NA	NA
X100124256_TGI_at	100124256_TGI_at	NM_199194	BRE	brain and reproductive organ-expressed (TNFRSF1A modulator)	1.7e-08	1.21319	0.0174257	1.04853	0.0366641	0.162754	1.07992	0.281113	0	0	NA	NA	NA
X100124261_TGI_at	100124261_TGI_at	NM_078467	CDKN1A	cyclin-dependent kinase inhibitor 1A (p21, Cip1)	6.16e-07	1.74211	0.0105916	1.26648	0.0256474	0.927501	0.964924	0.959351	0	0	NA	NA	NA
X100124265_TGI_at	100124265_TGI_at	NM_001040630	NCALD	neurocalcin delta	1.02e-09	0.781427	0.000348984	0.826512	0.00235309	0.0459127	0.867123	0.113219	0	0	NA	NA	NA
X100124274_TGI_at	100124274_TGI_at	NM_198834	ACACA	acetyl-Coenzyme A carboxylase alpha	9.04e-11	1.20595	0.00223935	1.11483	0.00859149	0.00543765	1.28228	0.0261966	0	1	U1	U1	U1
X100124309_TGI_at	100124309_TGI_at	CA841412	SH3TC1	SH3 domain and tetratricopeptide repeats 1	5.05e-07	1.32856	0.238892	1.04288	0.287838	0.0454296	1.15485	0.112199	0	0	NA	NA	NA
X100124329_TGI_at	100124329_TGI_at	NM_018420	SLC22A15	solute carrier family 22, member 15	1e-09	1.48304	0.00500424	1.21394	0.0151301	0.0335032	1.22881	0.0910461	0	0	NA	NA	NA
X100124330_TGI_at	100124330_TGI_at	NM_080717	TBX5	T-box 5	6.09e-09	0.782372	0.0274464	0.884647	0.05146	0.30723	0.892102	0.44644	0	0	NA	NA	NA
X100124343_TGI_at	100124343_TGI_at	NM_001671	ASGR1	asialoglycoprotein receptor 1	8.21e-11	1.40077	0.0859833	1.08533	0.125169	0.000276376	1.28747	0.00476343	0	0	NA	NA	NA
X100124392_TGI_at	100124392_TGI_at	CN307838	KIAA0355	KIAA0355	3.02e-08	0.786865	0.0150096	0.866655	0.0329761	0.0307137	0.830027	0.0860038	0	0	NA	NA	NA
X100124394_TGI_at	100124394_TGI_at	NM_003120	SPI1	spleen focus forming virus (SFFV) proviral integration oncogene spi1	5.62e-09	1.50596	0.0134405	1.17648	0.0303026	0.00236704	1.69414	0.0160949	0	1	U1	U1	U1
X100124425_TGI_at	100124425_TGI_at	ENST00000331920	PTCH1	patched homolog 1 (Drosophila)	4.59e-09	0.745471	0.0761067	0.901443	0.113351	0.816168	0.940491	0.885098	0	0	NA	NA	NA
X100124441_TGI_at	100124441_TGI_at	AB219936	MARVELD2	MARVEL domain containing 2	1.45e-07	0.80656	0.00793404	0.85094	0.0209602	0.567747	1.16977	0.691814	0	0	NA	NA	NA
X100124455_TGI_at	100124455_TGI_at	NM_031498	GNGT2	guanine nucleotide binding protein (G protein), gamma transducing activity polypeptide 2	5.31e-15	1.82401	0.00108881	1.28677	0.00511548	0.000292732	1.57754	0.0048727	0	1	U5	U1	U1
X100124471_TGI_at	100124471_TGI_at	NM_020760	HECW2	HECT, C2 and WW domain containing E3 ubiquitin protein ligase 2	4.58e-08	0.704655	0.000577323	0.755557	0.00335264	0.579048	0.979341	0.700553	0	0	NA	NA	NA
X100124473_TGI_at	100124473_TGI_at	AL037701	DENND2A	DENN/MADD domain containing 2A	1.55e-09	0.617841	0.000231545	0.77631	0.00180956	0.885954	0.994567	0.935477	0	0	NA	NA	NA
X100124490_TGI_at	100124490_TGI_at	NM_001995	ACSL1	acyl-CoA synthetase long-chain family member 1	6.99e-13	1.38746	0.0201129	1.10719	0.0410204	0.020453	1.22791	0.0642494	0	0	NA	NA	NA
X100124518_TGI_at	100124518_TGI_at	NM_002090	CXCL3	chemokine (C-X-C motif) ligand 3	2.54e-07	2.15342	3.22e-05	1.87476	0.000510526	0.00057123	2.00829	0.0068793	0	1	U1	U3	U1
X100124563_TGI_at	100124563_TGI_at	NM_006770	MARCO	macrophage receptor with collagenous structure	5.78e-11	1.58325	0.0101835	1.28416	0.0249673	0.000992908	1.96759	0.00935714	0	1	U2	U1	U1
X100124616_TGI_at	100124616_TGI_at	AB073386		Src homology 3 domain-containing guanine nucleotide exchange factor	2.63e-09	0.72208	0.101985	0.892859	0.142912	0.315219	1.12704	0.454361	0	0	NA	NA	NA
X100124646_TGI_at	100124646_TGI_at	BX647313	PBX1	pre-B-cell leukemia homeobox 1	2.18e-07	0.787105	0.118561	0.935023	0.160488	0.096917	0.895816	0.193654	0	0	NA	NA	NA
X100124701_TGI_at	100124701_TGI_at	NM_014298	QPRT	quinolinate phosphoribosyltransferase	2.14e-09	1.34265	0.00232563	1.15284	0.00875644	0.00622491	1.23447	0.0287023	0	1	U1	U1	U1
X100124713_TGI_at	100124713_TGI_at	T68445			1.01e-13	0.695212	0.00302007	0.777981	0.0105686	0.0397198	0.84822	0.101662	0	0	NA	NA	NA
X100124737_TGI_at	100124737_TGI_at	NM_014232	VAMP2	vesicle-associated membrane protein 2 (synaptobrevin 2)	5.53e-09	0.830965	0.109245	0.954625	0.150284	0.858978	1.04122	0.915505	0	0	NA	NA	NA
X100124755_TGI_at	100124755_TGI_at	NM_152451	GCOM1	GRINL1A complex locus	6.07e-10	0.649263	0.121289	0.864354	0.163494	0.721969	1.13052	0.813319	0	0	NA	NA	NA
X100124771_TGI_at	100124771_TGI_at	BC041906			9.91e-08	0.774044	0.319187	0.938056	0.368064	0.131303	0.90697	0.240586	0	0	NA	NA	NA
X100124798_TGI_at	100124798_TGI_at	NM_030948	PHACTR1	phosphatase and actin regulator 1	2.02e-12	1.55832	0.0109069	1.17462	0.0261166	0.000173465	1.59201	0.00402842	0	1	U4	U1	U1
X100124815_TGI_at	100124815_TGI_at	BC037909		hypothetical protein LOC642924	1.18e-08	0.729183	0.0474658	0.847513	0.0781718	0.279854	0.882449	0.417965	0	0	NA	NA	NA
X100124818_TGI_at	100124818_TGI_at	AK131463	PREPL	prolyl endopeptidase-like	4.02e-07	1.29128	0.0809228	1.07263	0.119039	0.0528906	1.20784	0.126178	0	0	NA	NA	NA
X100124841_TGI_at	100124841_TGI_at	BC016153	TMEM45B	transmembrane protein 45B	1.32e-11	1.51669	0.0839292	1.12961	0.122845	0.110977	1.20697	0.212903	0	0	NA	NA	NA
X100124853_TGI_at	100124853_TGI_at	AK098285	CHCHD7	coiled-coil-helix-coiled-coil-helix domain containing 7	1.22e-07	1.20493	0.0957346	1.0747	0.13572	0.00980226	1.18465	0.039468	0	0	NA	NA	NA
X100124874_TGI_at	100124874_TGI_at	AK090985	CBFA2T3	core-binding factor, runt domain, alpha subunit 2; translocated to, 3	1.26e-07	0.773704	0.0110478	0.885857	0.0263952	0.449193	0.9242	0.587204	0	0	NA	NA	NA
X100124914_TGI_at	100124914_TGI_at	AB046856	TANC2	tetratricopeptide repeat, ankyrin repeat and coiled-coil containing 2	2.81e-12	1.28197	0.103678	1.0721	0.144719	0.00256018	1.3382	0.0167713	0	0	NA	NA	NA
X100124986_TGI_at	100124986_TGI_at	NM_003374	VDAC1	voltage-dependent anion channel 1	1.11e-10	1.20086	0.0311382	1.06519	0.0565718	0.411774	1.04608	0.552978	0	0	NA	NA	NA
X100125024_TGI_at	100125024_TGI_at	DQ891897	LEPROTL1	leptin receptor overlapping transcript-like 1	2.41e-09	1.2241	0.0213577	1.12384	0.0429239	0.0043422	1.18909	0.0228675	0	1	U2	U1	U1
X100125041_TGI_at	100125041_TGI_at	NM_001032998	KYNU	kynureninase (L-kynurenine hydrolase)	4.47e-10	1.75948	0.000889677	1.44497	0.00448737	0.00514313	1.5203	0.0254238	0	1	U2	U1	U1
X100125045_TGI_at	100125045_TGI_at	U83460	SLC31A1	solute carrier family 31 (copper transporters), member 1	1.15e-16	2.02098	3.14e-05	1.31594	0.000508004	0.000343576	1.43145	0.00530062	0	1	U2	U1	U1
X100125046_TGI_at	100125046_TGI_at	NM_024989	PGAP1	post-GPI attachment to proteins 1	5.68e-08	0.733359	0.458209	0.987713	0.500953	0.0349754	0.794224	0.0937039	0	0	NA	NA	NA
X100125080_TGI_at	100125080_TGI_at	AK090989			1.78e-09	1.52203	4.06e-07	1.67779	3.96e-05	0.0639211	1.28824	0.144788	0	0	NA	NA	NA
X100125089_TGI_at	100125089_TGI_at	BX649145		hypothetical protein LOC157562	4.04e-08	0.727827	0.140775	0.907894	0.184663	0.491674	0.932931	0.62759	0	0	NA	NA	NA
X100125122_TGI_at	100125122_TGI_at	NM_152687	GAPT	GRB2-binding adaptor protein, transmembrane	4e-09	1.55133	0.0128136	1.26192	0.0293561	0.136822	1.29428	0.248859	0	0	NA	NA	NA
X100125149_TGI_at	100125149_TGI_at	CA307526			1.28e-12	2.07428	0.00228776	1.46591	0.00869631	0.00155839	1.72695	0.0123712	0	1	U3	U1	U1
X100125150_TGI_at	100125150_TGI_at	NM_194450	CLEC4A	C-type lectin domain family 4, member A	1.91e-11	1.48755	0.00880705	1.1862	0.0224922	0.0867106	1.18149	0.179492	0	0	NA	NA	NA
X100125155_TGI_at	100125155_TGI_at	BC015328			7.04e-08	0.741323	0.000889677	0.784729	0.00448737	0.0257168	0.819204	0.0754876	0	0	NA	NA	NA
X100125185_TGI_at	100125185_TGI_at	NM_001039538	MAP2	microtubule-associated protein 2	6.08e-11	0.729648	0.00155273	0.797794	0.00664398	0.0334083	0.876223	0.0910461	0	0	NA	NA	NA
X100125189_TGI_at	100125189_TGI_at	ENST00000320985	ZEB1	zinc finger E-box binding homeobox 1	3.65e-09	0.801598	0.0630709	0.899792	0.0978708	0.00219589	0.787728	0.0153189	0	0	NA	NA	NA
X100125197_TGI_at	100125197_TGI_at	NM_178865	SERINC2	serine incorporator 2	2.65e-08	1.37848	0.910249	1.02141	0.918801	0.331594	1.10876	0.472261	0	0	NA	NA	NA
X100125217_TGI_at	100125217_TGI_at	N33393			1.23e-06	1.3374	0.0193714	1.16522	0.0399449	0.131303	1.24267	0.240586	0	0	NA	NA	NA
X100125225_TGI_at	100125225_TGI_at	NM_016582	SLC15A3	solute carrier family 15, member 3	2.2e-12	1.55192	0.0082076	1.21428	0.0214543	0.00182693	1.43532	0.0139201	0	1	U2	U1	U1
X100125228_TGI_at	100125228_TGI_at	NM_170601	SIAE	sialic acid acetylesterase	2.74e-08	1.25825	0.00866158	1.15345	0.0222795	0.000220177	1.38363	0.00427298	0	1	U1	U1	U2
X100125249_TGI_at	100125249_TGI_at	AL161982			2.13e-08	0.671058	0.00614041	0.781906	0.0173449	0.9934	1.02142	0.995253	0	0	NA	NA	NA
X100125255_TGI_at	100125255_TGI_at	NM_002736	PRKAR2B	protein kinase, cAMP-dependent, regulatory, type II, beta	4.08e-09	0.76612	0.000921772	0.860218	0.00462033	0.225307	0.9022	0.356838	0	0	NA	NA	NA
X100125256_TGI_at	100125256_TGI_at	NM_014053	FLVCR1	feline leukemia virus subgroup C cellular receptor 1	2.97e-09	1.47361	0.106876	1.14074	0.148029	0.0293938	1.22695	0.0835417	0	0	NA	NA	NA
X100125272_TGI_at	100125272_TGI_at	CK004354			1.64e-08	0.819837	0.325938	0.94084	0.373976	0.209185	0.905739	0.337324	0	0	NA	NA	NA
X100125279_TGI_at	100125279_TGI_at	ENST00000375138	C1orf151	chromosome 1 open reading frame 151	9.67e-09	0.781139	0.00255482	0.856431	0.00936769	0.691576	0.977994	0.790968	0	0	NA	NA	NA
X100125280_TGI_at	100125280_TGI_at	AK055468			3.76e-08	0.773754	0.025304	0.884681	0.0486024	0.0836159	1.24365	0.17511	0	0	NA	NA	NA
X100125286_TGI_at	100125286_TGI_at	AK128527	BCAT1	branched chain aminotransferase 1, cytosolic	2.23e-16	2.33993	0.000407219	1.4283	0.0026461	0.0153743	1.42572	0.0529599	0	0	NA	NA	NA
X100125293_TGI_at	100125293_TGI_at	NM_002543	OLR1	oxidized low density lipoprotein (lectin-like) receptor 1	6.79e-16	1.51341	4.9e-05	1.26741	0.000675058	0.000355178	1.48991	0.00537129	0	1	U2	U2	U1
X100125301_TGI_at	100125301_TGI_at	NM_001080433	CCDC85A	coiled-coil domain containing 85A	4.22e-09	0.660361	0.106352	0.857654	0.147429	0.9934	1.01655	0.995253	0	0	NA	NA	NA
X100125321_TGI_at	100125321_TGI_at	NM_032562	PLA2G12B	phospholipase A2, group XIIB	1.26e-06	1.54023	0.0325982	1.30303	0.0584337	0.0188608	1.42668	0.0608694	0	0	NA	NA	NA
X100125335_TGI_at	100125335_TGI_at	NM_014048	MKL2	MKL/myocardin-like 2	8.73e-09	0.797604	0.0021192	0.900238	0.00829913	0.197238	0.933763	0.324668	0	0	NA	NA	NA
X100125340_TGI_at	100125340_TGI_at	AM392668	CTSZ	cathepsin Z	5.38e-08	1.32482	0.0310415	1.11937	0.056428	0.00337162	1.46791	0.0196505	0	0	NA	NA	NA
X100125367_TGI_at	100125367_TGI_at	NM_020223	FAM20C	family with sequence similarity 20, member C	2.37e-08	1.35695	0.0274296	1.10582	0.05146	0.299374	1.05193	0.437986	0	0	NA	NA	NA
X100125374_TGI_at	100125374_TGI_at	NM_005700	DPP3	dipeptidyl-peptidase 3	1.17e-10	1.28404	0.150192	1.05564	0.194717	0.440813	1.06848	0.578713	0	0	NA	NA	NA
X100125377_TGI_at	100125377_TGI_at	NM_002371	MAL	mal, T-cell differentiation protein	2.72e-07	0.734454	0.0460321	0.868028	0.0763569	0.120038	0.839156	0.225851	0	0	NA	NA	NA
X100125379_TGI_at	100125379_TGI_at	DQ893078	TKT	transketolase	2.01e-13	1.28343	0.0207252	1.11497	0.042011	0.000259767	1.33245	0.00460016	0	1	U2	U1	U1
X100125394_TGI_at	100125394_TGI_at	AK074557	TMED4	transmembrane emp24 protein transport domain containing 4	1.2e-10	0.822357	0.970301	1.01412	0.972715	0.374423	0.944805	0.511473	0	0	NA	NA	NA
X100125397_TGI_at	100125397_TGI_at	NM_152318	C12orf45	chromosome 12 open reading frame 45	6.45e-10	1.26064	0.0162684	1.10833	0.035002	0.481261	1.01511	0.61797	0	0	NA	NA	NA
X100125405_TGI_at	100125405_TGI_at	AK124913			4.64e-09	0.740285	0.00695653	0.840097	0.019033	0.209323	0.886318	0.337324	0	0	NA	NA	NA
X100125423_TGI_at	100125423_TGI_at	NM_001430	EPAS1	endothelial PAS domain protein 1	8.63e-13	0.832134	0.000422686	0.919609	0.00270838	0.474092	0.966188	0.610567	0	0	NA	NA	NA
X100125425_TGI_at	100125425_TGI_at	NM_005849	IGSF6	immunoglobulin superfamily, member 6	5.24e-14	1.96495	1.32e-05	1.45197	0.000318541	0.000345371	1.60825	0.00530062	0	1	U2	U2	U1
X100125441_TGI_at	100125441_TGI_at	NM_014844	KIAA0329	KIAA0329	3.43e-07	0.808135	0.0770507	0.903165	0.114387	0.0668422	1.1395	0.148369	0	0	NA	NA	NA
X100125468_TGI_at	100125468_TGI_at	NM_002118	HLA-DMB	major histocompatibility complex, class II, DM beta	1.37e-10	1.30525	0.0473908	1.09283	0.0780881	0.000747797	1.28621	0.00791355	0	0	NA	NA	NA
X100125476_TGI_at	100125476_TGI_at	BC047548	KIAA1462	KIAA1462	4.33e-10	0.693944	0.0591259	0.885156	0.0931392	0.33998	0.923297	0.480594	0	0	NA	NA	NA
X100125482_TGI_at	100125482_TGI_at	NM_012335	MYO1F	myosin IF	9.95e-09	1.37336	0.370034	1.06386	0.417145	0.0897963	1.21487	0.184145	0	0	NA	NA	NA
X100125483_TGI_at	100125483_TGI_at	BC015852			1.17e-06	0.773998	0.139682	0.920606	0.183653	0.648925	0.966012	0.755322	0	0	NA	NA	NA
X100125484_TGI_at	100125484_TGI_at	NM_000104	CYP1B1	cytochrome P450, family 1, subfamily B, polypeptide 1	1.14e-19	4.52613	3.33e-10	2.38476	1.67e-07	0.00281249	1.61726	0.017739	0	1	U8	U4	U1
X100125530_TGI_at	100125530_TGI_at	NM_004079	CTSS	cathepsin S	2.24e-08	1.30094	0.00532634	1.08844	0.0157494	0.000806993	1.2988	0.00825695	0	1	U2	U1	U1
X100125536_TGI_at	100125536_TGI_at	NM_032423	ZNF528	zinc finger protein 528	1.23e-06	0.801554	0.270797	0.946776	0.319933	0.25501	0.882035	0.38934	0	0	NA	NA	NA
X100125547_TGI_at	100125547_TGI_at	BC021982	ZNF780A	zinc finger protein 780A	4.06e-10	1.43986	0.0108599	1.1327	0.0261166	0.0443498	1.16056	0.110208	0	0	NA	NA	NA
X100125552_TGI_at	100125552_TGI_at	NM_001736	C5AR1	complement component 5a receptor 1	4.37e-12	1.42191	0.00171267	1.17742	0.00718833	0.0468646	1.25274	0.114688	0	0	NA	NA	NA
X100125568_TGI_at	100125568_TGI_at	NM_002686	PNMT	phenylethanolamine N-methyltransferase	2.45e-11	0.514539	2.94e-05	0.61448	0.000491632	0.526346	0.797732	0.659403	0	0	NA	NA	NA
X100125595_TGI_at	100125595_TGI_at	NM_001422	ELF5	E74-like factor 5 (ets domain transcription factor)	4.66e-13	2.65015	0.000261549	1.49848	0.00195132	0.00714438	1.95326	0.0318925	0	1	U6	U1	U1
X100125604_TGI_at	100125604_TGI_at	DQ891254	LMAN1	lectin, mannose-binding, 1	1.09e-06	1.28875	0.0278375	1.20736	0.0521023	0.927501	1.01529	0.959351	0	0	NA	NA	NA
X100125605_TGI_at	100125605_TGI_at	NM_001793	CDH3	cadherin 3, type 1, P-cadherin (placental)	5.95e-09	1.60596	0.147001	1.15376	0.191196	0.118794	0.748446	0.224033	0	0	NA	NA	NA
X100125608_TGI_at	100125608_TGI_at	NM_053064	GNG2	guanine nucleotide binding protein (G protein), gamma 2	2.56e-08	0.784819	0.0217282	0.906208	0.0434968	0.29165	0.903327	0.4302	0	0	NA	NA	NA
X100125612_TGI_at	100125612_TGI_at	AY562243	REEP5	receptor accessory protein 5	8.24e-13	1.28089	0.000518817	1.13892	0.00311387	1.18e-05	1.22626	0.00132304	0	1	U1	U1	U1
X100125626_TGI_at	100125626_TGI_at	AK021874			4.57e-08	0.784169	0.724641	0.979949	0.748563	0.579048	0.922373	0.700553	0	0	NA	NA	NA
X100125641_TGI_at	100125641_TGI_at	ENST00000367554	NPL	N-acetylneuraminate pyruvate lyase (dihydrodipicolinate synthase)	1.28e-11	1.88447	0.000535197	1.33869	0.00317669	0.000188734	1.74908	0.00402842	0	1	U5	U1	U1
X100125654_TGI_at	100125654_TGI_at	NM_080676	MACROD2	MACRO domain containing 2	7.23e-08	1.714	0.0335327	1.33032	0.0594477	0.000203903	1.95577	0.00415936	0	0	NA	NA	NA
X100125682_TGI_at	100125682_TGI_at	NM_181523	PIK3R1	phosphoinositide-3-kinase, regulatory subunit 1 (alpha)	1.68e-09	0.775482	0.0561021	0.907969	0.0896021	0.460794	0.903559	0.597401	0	0	NA	NA	NA
X100125698_TGI_at	100125698_TGI_at	AF052941	DAPK2	death-associated protein kinase 2	9.24e-08	0.78569	0.0417248	0.858077	0.0706297	0.303779	1.10221	0.443625	0	0	NA	NA	NA
X100125706_TGI_at	100125706_TGI_at	NM_003248	THBS4	thrombospondin 4	8.3e-07	1.56051	0.00012759	1.49481	0.00120476	0.967011	1.04157	0.980395	0	0	NA	NA	NA
X100125715_TGI_at	100125715_TGI_at	NM_003122	SPINK1	serine peptidase inhibitor, Kazal type 1	9.91e-08	2.03913	0.00382748	1.50677	0.0124858	0.0883611	1.40612	0.182791	0	0	NA	NA	NA
X100125723_TGI_at	100125723_TGI_at	ENST00000379842	NEO1	neogenin homolog 1 (chicken)	4.22e-09	0.772721	0.00263013	0.887265	0.0095246	0.526346	0.910233	0.659403	0	0	NA	NA	NA
X100125740_TGI_at	100125740_TGI_at	NM_015994	ATP6V1D	ATPase, H+ transporting, lysosomal 34kDa, V1 subunit D	6.57e-11	1.27315	0.166579	1.03143	0.212376	0.089942	1.06707	0.184145	0	0	NA	NA	NA
X100125753_TGI_at	100125753_TGI_at	NM_001937	DPT	dermatopontin	2.34e-14	0.558122	0.00968499	0.749031	0.0241226	0.252599	0.890974	0.387495	0	0	NA	NA	NA
X100125792_TGI_at	100125792_TGI_at	NM_007364	TMED3	transmembrane emp24 protein transport domain containing 3	1.92e-12	1.35772	0.196606	1.06927	0.245036	0.0776894	1.17899	0.166153	0	0	NA	NA	NA
X100125798_TGI_at	100125798_TGI_at	NM_002291	LAMB1	laminin, beta 1	1.84e-09	0.763643	0.000964889	0.813055	0.00471187	0.0268967	0.794226	0.0781678	0	0	NA	NA	NA
X100125872_TGI_at	100125872_TGI_at	NM_015035	ZHX3	zinc fingers and homeoboxes 3	6.96e-07	0.829351	0.0201092	0.909374	0.0410204	0.089895	1.10895	0.184145	0	0	NA	NA	NA
X100125890_TGI_at	100125890_TGI_at	BQ001967	PSD3	pleckstrin and Sec7 domain containing 3	5.68e-08	1.39523	0.0082076	1.29164	0.0214543	0.716663	1.0602	0.809322	0	0	NA	NA	NA
X100125892_TGI_at	100125892_TGI_at	NM_021637	TMEM35	transmembrane protein 35	1.7e-07	0.738785	0.319187	0.957372	0.368064	0.248076	0.877847	0.381464	0	0	NA	NA	NA
X100125903_TGI_at	100125903_TGI_at	NM_001039960	SLC4A8	solute carrier family 4, sodium bicarbonate cotransporter, member 8	1.82e-07	1.39723	0.221266	1.13546	0.270566	0.967011	0.980865	0.980395	0	0	NA	NA	NA
X100125915_TGI_at	100125915_TGI_at	AA854847			2.71e-12	2.21346	0.042303	1.22065	0.0713836	0.185789	1.21926	0.311549	0	0	NA	NA	NA
X100125955_TGI_at	100125955_TGI_at	NM_020415	RETN	resistin	6.57e-13	1.98716	0.000570407	1.41285	0.00333048	0.00240953	1.90978	0.0161454	0	1	U2	U1	U1
X100125969_TGI_at	100125969_TGI_at	NM_144724	MARVELD2	MARVEL domain containing 2	2.97e-07	0.828259	0.401328	0.949132	0.447337	0.914366	1.05042	0.951874	0	0	NA	NA	NA
X100126009_TGI_at	100126009_TGI_at	NM_013258	PYCARD	PYD and CARD domain containing	4.2e-10	1.40107	0.0274464	1.12808	0.05146	0.00010495	1.52467	0.00328403	0	0	NA	NA	NA
X100126021_TGI_at	100126021_TGI_at	DA034095	MCFD2	multiple coagulation factor deficiency 2	1.02e-11	1.33367	0.0123186	1.13874	0.0285427	0.793642	0.962426	0.870332	0	0	NA	NA	NA
X100126040_TGI_at	100126040_TGI_at	BE466108	STYX	serine/threonine/tyrosine interacting protein	5.97e-11	1.26331	2.15e-05	1.17564	0.000410363	0.0456034	1.08406	0.112542	0	0	NA	NA	NA
X100126085_TGI_at	100126085_TGI_at	AK090811			3.26e-07	0.832058	0.75275	0.983498	0.774127	3.58e-05	0.764671	0.0018051	0	0	NA	NA	NA
X100126092_TGI_at	100126092_TGI_at	NM_182639	HPS1	Hermansky-Pudlak syndrome 1	6.13e-12	1.51633	0.0053202	1.16683	0.0157494	0.0126569	1.22303	0.0464474	0	1	U4	U1	U1
X100126118_TGI_at	100126118_TGI_at	BC072423	SLC1A4	solute carrier family 1 (glutamate/neutral amino acid transporter), member 4	8.15e-09	1.33239	0.501201	1.03705	0.540801	0.10722	0.883948	0.208175	0	0	NA	NA	NA
X100126132_TGI_at	100126132_TGI_at	AK097371	PTPRB	protein tyrosine phosphatase, receptor type, B	8.8e-08	0.739601	0.0021192	0.798578	0.00829913	0.816168	1.04935	0.885098	0	0	NA	NA	NA
X100126133_TGI_at	100126133_TGI_at	ENST00000378092	KCNAB2	potassium voltage-gated channel, shaker-related subfamily, beta member 2	1.56e-08	1.70196	0.232801	1.06348	0.281439	0.196883	1.18184	0.324668	0	0	NA	NA	NA
X100126137_TGI_at	100126137_TGI_at	NM_014431	KIAA1274	KIAA1274	4.7e-08	0.78745	0.0198072	0.887465	0.0405839	0.579048	0.96048	0.700553	0	0	NA	NA	NA
X100126144_TGI_at	100126144_TGI_at	NM_016001	UTP18	UTP18, small subunit (SSU) processome component, homolog (yeast)	3.17e-10	1.23905	0.441064	1.02277	0.485336	0.330381	1.04577	0.471576	0	0	NA	NA	NA
X100126168_TGI_at	100126168_TGI_at	NM_201536	NDRG2	NDRG family member 2	1.49e-07	0.791624	0.0110755	0.871327	0.0264027	0.0474068	0.899705	0.115927	0	0	NA	NA	NA
X100126186_TGI_at	100126186_TGI_at	NM_014629	ARHGEF10	Rho guanine nucleotide exchange factor (GEF) 10	2.13e-12	0.745959	0.000291349	0.848012	0.00207748	0.144787	0.890656	0.258531	0	0	NA	NA	NA
X100126203_TGI_at	100126203_TGI_at	NM_005160	ADRBK2	adrenergic, beta, receptor kinase 2	2.94e-07	1.23552	0.393849	1.04055	0.439991	0.00112747	1.31456	0.0101221	0	0	NA	NA	NA
X100126232_TGI_at	100126232_TGI_at	CR936700	VGLL3	vestigial like 3 (Drosophila)	2.72e-07	0.728176	0.00954593	0.851154	0.0238131	0.0867106	0.802235	0.179492	0	0	NA	NA	NA
X100126234_TGI_at	100126234_TGI_at	AI087792			1.05e-07	0.648018	0.277061	0.867894	0.326138	0.55655	1.03464	0.683598	0	0	NA	NA	NA
X100126242_TGI_at	100126242_TGI_at	NM_002747	MAPK4	mitogen-activated protein kinase 4	1.17e-10	0.646939	0.00080841	0.725147	0.00423659	0.648925	1.07198	0.755322	0	0	NA	NA	NA
X100126245_TGI_at	100126245_TGI_at	NM_001173	ARHGAP5	Rho GTPase activating protein 5	3.29e-07	0.767961	0.392977	0.970091	0.439169	0.0694323	0.875201	0.153169	0	0	NA	NA	NA
X100126265_TGI_at	100126265_TGI_at	NM_206938	MS4A7	membrane-spanning 4-domains, subfamily A, member 7	2.74e-10	1.38171	2.83e-06	1.29316	0.000115604	0.00120389	1.58317	0.0106305	0	1	U2	U2	U1
X100126281_TGI_at	100126281_TGI_at	NM_001044385	ALS2CR4	amyotrophic lateral sclerosis 2 (juvenile) chromosome region, candidate 4	8.75e-14	0.687599	0.0622629	0.904359	0.0970843	0.191452	0.873317	0.318231	0	0	NA	NA	NA
X100126295_TGI_at	100126295_TGI_at	NM_004758	BZRAP1	benzodiazapine receptor (peripheral) associated protein 1	4.67e-07	0.78275	0.00880215	0.862392	0.0224922	0.0186209	0.796284	0.0602562	0	0	NA	NA	NA
X100126332_TGI_at	100126332_TGI_at	NM_002863	PYGL	phosphorylase, glycogen, liver	2.19e-10	1.27237	0.0614745	1.07742	0.0960874	0.0320831	1.12258	0.0883194	0	0	NA	NA	NA
X100126342_TGI_at	100126342_TGI_at	NM_001718	BMP6	bone morphogenetic protein 6	1.26e-06	0.666052	0.134754	0.866358	0.178362	0.601955	1.08384	0.718556	0	0	NA	NA	NA
X100126362_TGI_at	100126362_TGI_at	AJ133133	ENTPD1	ectonucleoside triphosphate diphosphohydrolase 1	9.61e-07	1.31648	0.0112495	1.17596	0.0266809	0.269271	1.10648	0.405164	0	0	NA	NA	NA
X100126425_TGI_at	100126425_TGI_at	NM_182925	FLT4	fms-related tyrosine kinase 4	5.46e-10	0.701134	0.0109069	0.848324	0.0261166	0.55655	0.931312	0.683598	0	0	NA	NA	NA
X100126476_TGI_at	100126476_TGI_at	NM_181720	ARHGAP30	Rho GTPase activating protein 30	1.88e-07	1.253	0.947956	1.01844	0.953255	0.0291393	1.25834	0.0835417	0	0	NA	NA	NA
X100126501_TGI_at	100126501_TGI_at	NM_032512	PDZD4	PDZ domain containing 4	1.9e-09	0.724186	0.00590619	0.851436	0.0168011	0.0342811	0.825774	0.0927692	0	0	NA	NA	NA
X100126535_TGI_at	100126535_TGI_at	ENST00000238570	PCNX	pecanex homolog (Drosophila)	4.02e-11	1.26211	0.239296	1.0381	0.287887	0.606497	1.02341	0.723709	0	0	NA	NA	NA
X100126546_TGI_at	100126546_TGI_at	NM_032331	ECE2	endothelin converting enzyme 2	8.09e-09	1.33725	0.223633	1.07516	0.272849	0.0595355	1.19155	0.137946	0	0	NA	NA	NA
X100126558_TGI_at	100126558_TGI_at	NM_014899	RHOBTB3	Rho-related BTB domain containing 3	2.3e-07	0.770201	0.412116	0.947692	0.457544	0.0108553	0.778463	0.0419049	0	0	NA	NA	NA
X100126576_TGI_at	100126576_TGI_at	BC042008		hypothetical protein LOC220930	1.7e-07	0.762568	0.223663	0.914536	0.272849	0.00176862	0.729768	0.0135077	0	0	NA	NA	NA
X100126584_TGI_at	100126584_TGI_at	NM_020925	CACHD1	cache domain containing 1	5.42e-11	1.2761	1.55e-05	1.2113	0.000343627	0.511433	1.04462	0.646425	0	0	NA	NA	NA
X100126595_TGI_at	100126595_TGI_at	AL360134	TRIM22	tripartite motif-containing 22	6.09e-10	1.26739	0.0905818	1.08904	0.130333	0.491674	1.04569	0.62759	0	0	NA	NA	NA
X100126597_TGI_at	100126597_TGI_at	AF498925	GRB2	growth factor receptor-bound protein 2	1.06e-06	1.21888	0.0387707	1.11533	0.0668582	0.0281219	1.20455	0.0808537	0	0	NA	NA	NA
X100126608_TGI_at	100126608_TGI_at	NM_030788	TM7SF4	transmembrane 7 superfamily member 4	6.27e-16	4.14762	6.61e-08	2.74977	9.69e-06	0.00023763	2.75174	0.0044528	0	1	U2	U2	U1
X100126638_TGI_at	100126638_TGI_at	BC013942			6.3e-07	1.57861	0.00459572	1.35082	0.014256	0.000371641	1.81995	0.00537129	0	1	U1	U1	U1
X100126640_TGI_at	100126640_TGI_at	NM_005917	MDH1	malate dehydrogenase 1, NAD (soluble)	3.43e-07	1.20052	0.000165838	1.13957	0.00141401	0.0967262	1.11565	0.193392	0	0	NA	NA	NA
X100126652_TGI_at	100126652_TGI_at	NM_080809	COL13A1	collagen, type XIII, alpha 1	1.32e-08	0.725677	0.139251	0.929829	0.183335	0.185789	0.87122	0.311549	0	0	NA	NA	NA
X100126696_TGI_at	100126696_TGI_at	AI341167	CD163	CD163 molecule	1.48e-08	1.79522	0.532148	1.05364	0.570373	0.601955	1.08655	0.718556	0	0	NA	NA	NA
X100126761_TGI_at	100126761_TGI_at	NM_020452	ATP8B2	ATPase, class I, type 8B, member 2	5.38e-08	0.76741	0.217196	0.910254	0.266473	0.204001	0.887175	0.331733	0	0	NA	NA	NA
X100126838_TGI_at	100126838_TGI_at	NM_001083	PDE5A	phosphodiesterase 5A, cGMP-specific	5.05e-10	0.756744	0.96152	1.02846	0.965414	0.276599	0.862444	0.413487	0	0	NA	NA	NA
X100126852_TGI_at	100126852_TGI_at	NM_173359	EIF4E3	eukaryotic translation initiation factor 4E family member 3	1.62e-08	0.78903	0.000940185	0.884674	0.0046456	0.5292	1.06096	0.660834	0	0	NA	NA	NA
X100126911_TGI_at	100126911_TGI_at	NM_021785	RAI2	retinoic acid induced 2	3.12e-10	0.766987	0.00104101	0.889407	0.00494137	0.862086	0.988829	0.916393	0	0	NA	NA	NA
X100126932_TGI_at	100126932_TGI_at	AL080186	SFRS18	splicing factor, arginine/serine-rich 18	2.01e-08	0.752836	0.68786	0.990021	0.716076	0.0694323	0.868535	0.153169	0	0	NA	NA	NA
X100126983_TGI_at	100126983_TGI_at	BQ005994	LAMB1	laminin, beta 1	6.95e-07	0.745024	0.0114506	0.836852	0.0269775	0.0397198	0.698469	0.101662	0	0	NA	NA	NA
X100126991_TGI_at	100126991_TGI_at	BT007051	CAV2	caveolin 2	6.35e-08	0.765501	0.979437	0.998055	0.981263	0.114834	1.19252	0.218741	0	0	NA	NA	NA
X100127006_TGI_at	100127006_TGI_at	AY344091	TXNRD1	thioredoxin reductase 1	3.58e-11	1.4871	0.0112375	1.15779	0.0266809	0.00166052	1.42903	0.0128961	0	1	U2	U1	U1
X100127023_TGI_at	100127023_TGI_at	NM_178140	PDZD2	PDZ domain containing 2	4.96e-08	0.787829	0.812109	0.979044	0.829875	0.0335032	1.16559	0.0910461	0	0	NA	NA	NA
X100127025_TGI_at	100127025_TGI_at	BX649155	PSIP1	PC4 and SFRS1 interacting protein 1	1.9e-09	0.785583	0.318679	0.964341	0.367741	0.00200392	0.818669	0.0146454	0	0	NA	NA	NA
X100127039_TGI_at	100127039_TGI_at	NM_003332	TYROBP	TYRO protein tyrosine kinase binding protein	7.77e-12	1.37461	0.00119487	1.14394	0.00544707	1.09e-05	1.45744	0.0013063	0	1	U5	U2	U1
X100127045_TGI_at	100127045_TGI_at	NM_000167	GK	glycerol kinase	3.04e-08	1.44827	0.00585707	1.19582	0.0166761	0.122858	1.21639	0.22915	0	0	NA	NA	NA
X100127090_TGI_at	100127090_TGI_at	ENST00000370361		hypothetical protein LOC203547	3.43e-09	1.34451	0.263323	1.07247	0.312596	0.120227	1.16405	0.226074	0	0	NA	NA	NA
X100127124_TGI_at	100127124_TGI_at	NM_207481		Nck-associated protein 5	6.67e-09	0.678359	0.655405	0.919267	0.686726	0.0390467	1.51527	0.101245	0	0	NA	NA	NA
X100127178_TGI_at	100127178_TGI_at	BX644237			1.02e-07	0.7481	0.158399	0.876062	0.203638	0.623345	0.895925	0.736452	0	0	NA	NA	NA
X100127179_TGI_at	100127179_TGI_at	NM_005787	ALG3	asparagine-linked glycosylation 3 homolog (S. cerevisiae, alpha-1,3-mannosyltransferase)	8.49e-08	1.27007	0.16075	1.04554	0.206249	0.526346	1.05739	0.659403	0	0	NA	NA	NA
X100127198_TGI_at	100127198_TGI_at	NM_020381	PDSS2	prenyl (decaprenyl) diphosphate synthase, subunit 2	3.76e-10	1.25574	0.00276424	1.08262	0.00984436	0.506743	1.00682	0.64183	0	0	NA	NA	NA
X100127265_TGI_at	100127265_TGI_at	NM_153702	ELMOD2	ELMO/CED-12 domain containing 2	2.68e-07	1.38561	0.0761067	1.11835	0.113351	0.819787	1.00106	0.887827	0	0	NA	NA	NA
X100127301_TGI_at	100127301_TGI_at	AI128130			7.92e-09	0.596836	0.042888	0.780683	0.0721441	0.348497	0.881953	0.486869	0	0	NA	NA	NA
X100127305_TGI_at	100127305_TGI_at	AK022042	SLC28A3	solute carrier family 28 (sodium-coupled nucleoside transporter), member 3	1.1e-11	2.222	6.43e-08	2.37879	9.69e-06	0.979809	0.992503	0.987557	0	0	NA	NA	NA
X100127321_TGI_at	100127321_TGI_at	NM_016588	NRN1	neuritin 1	8.75e-13	0.656541	0.0272167	0.88142	0.0512182	0.784831	1.01761	0.86155	0	0	NA	NA	NA
X100127385_TGI_at	100127385_TGI_at	BM705209			7.69e-07	1.32113	0.306581	1.09509	0.355563	0.0342811	1.36072	0.0927692	0	0	NA	NA	NA
X100127386_TGI_at	100127386_TGI_at	NM_002725	PRELP	proline/arginine-rich end leucine-rich repeat protein	2.86e-07	0.705114	0.447887	0.919743	0.490667	0.493698	0.996018	0.62868	0	0	NA	NA	NA
X100127463_TGI_at	100127463_TGI_at	AF063657	FLT1	fms-related tyrosine kinase 1 (vascular endothelial growth factor/vascular permeability factor receptor)	6.98e-10	0.754909	4.43e-05	0.771083	0.000631699	0.350421	0.927513	0.489133	0	0	NA	NA	NA
X100127469_TGI_at	100127469_TGI_at	NM_003238	TGFB2	transforming growth factor, beta 2	1.95e-08	0.747349	0.0353933	0.872545	0.0623689	0.402347	0.90107	0.542113	0	0	NA	NA	NA
X100127479_TGI_at	100127479_TGI_at	DC343925	MRPS15	mitochondrial ribosomal protein S15	3.04e-08	1.30288	0.0249318	1.08208	0.0480593	0.0028869	1.22781	0.0178932	0	1	U4	U1	U1
X100127490_TGI_at	100127490_TGI_at	NM_018992	KCTD5	potassium channel tetramerisation domain containing 5	4.7e-11	1.26813	0.00020789	1.17529	0.00166674	0.0550347	1.17106	0.129378	0	0	NA	NA	NA
X100127506_TGI_at	100127506_TGI_at	AF131214	SNX9	sorting nexin 9	1.2e-06	1.31696	0.132098	1.08234	0.175785	0.914366	1.01972	0.951874	0	0	NA	NA	NA
X100127543_TGI_at	100127543_TGI_at	AK091057		hypothetical protein LOC285535	6.28e-07	0.791373	0.680711	0.993071	0.709093	0.0431702	0.837609	0.107775	0	0	NA	NA	NA
X100127552_TGI_at	100127552_TGI_at	ENST00000254898	MATN2	matrilin 2	1.15e-08	0.695506	0.370034	0.914363	0.417145	0.660894	0.894059	0.764285	0	0	NA	NA	NA
X100127559_TGI_at	100127559_TGI_at	AY344083	TXNRD1	thioredoxin reductase 1	4.52e-11	1.4551	0.0184052	1.13272	0.0382462	0.000495904	1.31993	0.00635688	0	1	U2	U1	U1
X100127560_TGI_at	100127560_TGI_at	BG498372			1.38e-16	2.06521	6.93e-07	1.69397	5.2e-05	0.00530673	1.41929	0.0259933	0	1	U5	U2	U1
X100127567_TGI_at	100127567_TGI_at	NM_001080410	FBXO41	F-box protein 41	7.52e-07	1.25771	0.0673095	1.13144	0.103452	0.648925	1.0445	0.755322	0	0	NA	NA	NA
X100127581_TGI_at	100127581_TGI_at	AF086441	C21orf71	chromosome 21 open reading frame 71	2.94e-07	0.800866	0.000836876	0.862031	0.00433642	0.856524	0.953351	0.913191	0	0	NA	NA	NA
X100127614_TGI_at	100127614_TGI_at	NM_000521	HEXB	hexosaminidase B (beta polypeptide)	1.18e-13	1.44291	2.64e-06	1.21056	0.000115604	0.000137814	1.33655	0.00370146	0	1	U2	U2	U1
X100127618_TGI_at	100127618_TGI_at	BC053553	NET1	neuroepithelial cell transforming 1	1.61e-07	0.79912	0.599565	0.9635	0.633781	0.0113956	0.778299	0.0432519	0	0	NA	NA	NA
X100127633_TGI_at	100127633_TGI_at	ENST00000378047	FGF1	fibroblast growth factor 1 (acidic)	4.48e-09	0.624438	0.0442066	0.843001	0.0738609	0.00667041	0.660556	0.0302799	0	0	NA	NA	NA
X100127645_TGI_at	100127645_TGI_at	NM_004172	SLC1A3	solute carrier family 1 (glial high affinity glutamate transporter), member 3	2.81e-10	1.74499	0.248433	1.10115	0.297437	0.209185	1.18991	0.337324	0	0	NA	NA	NA
X100127703_TGI_at	100127703_TGI_at	ENST00000368682	FYN	FYN oncogene related to SRC, FGR, YES	3.76e-10	0.719327	0.0916312	0.903854	0.131432	0.512848	1.08417	0.646425	0	0	NA	NA	NA
X100127714_TGI_at	100127714_TGI_at	NM_031426	AIF1L	allograft inflammatory factor 1-like	9.5e-12	0.666594	4.77e-05	0.772564	0.000659239	0.235851	0.822352	0.368289	0	0	NA	NA	NA
X100127746_TGI_at	100127746_TGI_at	AK023435	GVIN1	GTPase, very large interferon inducible 1	1.8e-08	0.75744	0.0743865	0.900543	0.111407	0.611187	1.04465	0.72702	0	0	NA	NA	NA
X100127800_TGI_at	100127800_TGI_at	NM_020465	NDRG4	NDRG family member 4	2.25e-08	0.699503	0.000878456	0.742832	0.00448138	0.772133	1.01539	0.852547	0	0	NA	NA	NA
X100127826_TGI_at	100127826_TGI_at	AK025611	CCDC93	coiled-coil domain containing 93	1.77e-10	1.67831	0.00559992	1.16757	0.0162908	0.331594	0.893771	0.472261	0	0	NA	NA	NA
X100127847_TGI_at	100127847_TGI_at	NM_002020	FLT4	fms-related tyrosine kinase 4	1.24e-07	0.693464	0.0268413	0.83088	0.0506199	0.888166	1.00074	0.935477	0	0	NA	NA	NA
X100127892_TGI_at	100127892_TGI_at	ENST00000371276	TTC22	tetratricopeptide repeat domain 22	4.77e-07	0.807972	0.103678	0.933273	0.144719	0.55201	0.982128	0.680615	0	0	NA	NA	NA
X100127902_TGI_at	100127902_TGI_at	NM_001001290	SLC2A9	solute carrier family 2 (facilitated glucose transporter), member 9	2.13e-13	1.79207	2.4e-07	1.35882	2.75e-05	0.00100329	1.38048	0.00940003	0	1	U4	U1	U1
X100127955_TGI_at	100127955_TGI_at	N94992	ABI2	abl interactor 2	1.35e-07	0.766311	0.929255	0.967882	0.935934	0.70408	1.07944	0.801289	0	0	NA	NA	NA
X100127992_TGI_at	100127992_TGI_at	NM_032539	SLITRK2	SLIT and NTRK-like family, member 2	5.15e-16	0.338937	7.59e-06	0.554534	0.000239953	0.0528906	0.661706	0.126178	0	0	NA	NA	NA
X100128015_TGI_at	100128015_TGI_at	NM_020957	PCDHB16	protocadherin beta 16	3.52e-07	0.737896	0.861316	0.977929	0.873237	0.159284	0.787755	0.276601	0	0	NA	NA	NA
X100128031_TGI_at	100128031_TGI_at	NM_003099	SNX1	sorting nexin 1	8.85e-13	0.767903	0.279577	0.969461	0.328381	0.422283	0.961004	0.560905	0	0	NA	NA	NA
X100128053_TGI_at	100128053_TGI_at	NM_021998	ZNF711	zinc finger protein 711	4.2e-09	0.6856	0.13037	0.909589	0.174061	0.00325024	0.63934	0.0191159	0	0	NA	NA	NA
X100128073_TGI_at	100128073_TGI_at	NM_003649	DDO	D-aspartate oxidase	2.27e-09	1.52064	0.0194871	1.20571	0.0401264	0.00112747	1.40828	0.0101221	0	1	U1	U1	U1
X100128088_TGI_at	100128088_TGI_at	NM_032918	RERG	RAS-like, estrogen-regulated, growth inhibitor	8.48e-09	0.74646	0.327348	0.950618	0.375327	0.235851	0.925362	0.368289	0	0	NA	NA	NA
X100128092_TGI_at	100128092_TGI_at	BC002326	MAPKAP1	mitogen-activated protein kinase associated protein 1	5.59e-11	1.2984	0.042303	1.07993	0.0713836	0.00171044	1.25033	0.0131256	0	0	NA	NA	NA
X100128096_TGI_at	100128096_TGI_at	NM_000434	NEU1	sialidase 1 (lysosomal sialidase)	2.5e-11	1.29085	0.00260307	1.14498	0.0094585	5.09e-05	1.3634	0.00207993	0	1	U1	U1	U2
X100128113_TGI_at	100128113_TGI_at	AW975990	ZNF704	zinc finger protein 704	1.23e-06	0.769295	0.772185	0.992514	0.792596	0.402475	1.1155	0.542113	0	0	NA	NA	NA
X100128132_TGI_at	100128132_TGI_at	NM_020190	OLFML3	olfactomedin-like 3	6.3e-07	0.810447	0.427598	0.962609	0.472616	0.87511	0.987596	0.925961	0	0	NA	NA	NA
X100128138_TGI_at	100128138_TGI_at	NM_058164	OLFM2	olfactomedin 2	6.93e-09	1.62859	5.38e-05	1.43741	0.000715495	0.00344672	1.50589	0.0196615	0	1	U1	U2	U1
X100128142_TGI_at	100128142_TGI_at	BC007710	SSR1	signal sequence receptor, alpha	3.49e-10	1.31854	0.0705676	1.062	0.107492	0.709599	1.04135	0.803598	0	0	NA	NA	NA
X100128157_TGI_at	100128157_TGI_at	NM_020421	ADCK1	aarF domain containing kinase 1	5.05e-09	1.35467	0.239165	1.072	0.287838	0.940656	1.03279	0.965521	0	0	NA	NA	NA
X100128161_TGI_at	100128161_TGI_at	NM_005041	PRF1	perforin 1 (pore forming protein)	3.2e-07	0.724898	0.263326	0.923946	0.312596	0.611187	0.979363	0.72702	0	0	NA	NA	NA
X100128192_TGI_at	100128192_TGI_at	NM_001100912	BEND7	BEN domain containing 7	1.8e-08	0.799365	0.0663903	0.913453	0.102577	0.29165	0.934335	0.4302	0	0	NA	NA	NA
X100128198_TGI_at	100128198_TGI_at	NM_019055	ROBO4	roundabout homolog 4, magic roundabout (Drosophila)	3.83e-07	0.768067	0.00491677	0.826491	0.0149497	0.0594592	0.794792	0.137946	0	0	NA	NA	NA
X100128206_TGI_at	100128206_TGI_at	ENST00000333209	GPRIN3	GPRIN family member 3	2.87e-15	1.86125	2.58e-05	1.41475	0.000460173	0.00219589	1.3892	0.0153189	0	1	U8	U2	U1
X100128220_TGI_at	100128220_TGI_at	AK094703	LPHN3	latrophilin 3	5.05e-07	0.639688	0.34754	0.90222	0.394826	0.534478	0.910808	0.664336	0	0	NA	NA	NA
X100128223_TGI_at	100128223_TGI_at	NM_182947		RhoA/RAC/CDC42 exchange factor	1.64e-09	0.735573	0.026274	0.865468	0.0499299	0.075603	0.838211	0.163426	0	0	NA	NA	NA
X100128228_TGI_at	100128228_TGI_at	NM_004271	LY86	lymphocyte antigen 86	6.57e-11	1.58882	4.21e-05	1.37566	0.000609621	3.34e-06	1.71717	0.000832852	0	1	U3	U1	U1
X100128246_TGI_at	100128246_TGI_at	NM_177444	PPFIBP1	PTPRF interacting protein, binding protein 1 (liprin beta 1)	7.23e-08	0.745132	0.00220674	0.873103	0.00851776	0.203149	0.905691	0.330515	0	0	NA	NA	NA
X100128247_TGI_at	100128247_TGI_at	AY426759	CLEC12A	C-type lectin domain family 12, member A	1.54e-11	2.0072	0.00211542	1.42841	0.00829913	0.0126269	1.51488	0.0464474	0	1	U2	U1	U1
X100128252_TGI_at	100128252_TGI_at	AL109691			9.15e-07	1.29683	0.0151661	1.19989	0.0331843	0.0931708	1.26921	0.188857	0	0	NA	NA	NA
X100128253_TGI_at	100128253_TGI_at	NM_001039847	GPX4	glutathione peroxidase 4 (phospholipid hydroperoxidase)	2.34e-09	1.23299	0.05989	1.05812	0.0941177	0.00919586	1.24874	0.0380041	0	0	NA	NA	NA
X100128259_TGI_at	100128259_TGI_at	AK075203	UBASH3B	ubiquitin associated and SH3 domain containing, B	1.62e-12	2.23737	9.17e-06	1.69973	0.000259388	2.53e-06	2.28571	0.000740535	1	1	U4	U2	U1
X100128300_TGI_at	100128300_TGI_at	NM_152637	METTL7B	methyltransferase like 7B	1.78e-08	1.70641	0.0227445	1.24198	0.0450833	0.0836159	1.3604	0.17511	0	0	NA	NA	NA
X100128312_TGI_at	100128312_TGI_at	NM_005720	ARPC1B	actin related protein 2/3 complex, subunit 1B, 41kDa	4.02e-07	1.20426	0.680701	1.01541	0.709093	0.00465476	1.21326	0.0239271	0	0	NA	NA	NA
X100128316_TGI_at	100128316_TGI_at	AL579340	VPS33A	vacuolar protein sorting 33 homolog A (S. cerevisiae)	3.58e-08	1.22914	0.0230129	1.11112	0.0453642	0.023488	1.20426	0.0704859	0	0	NA	NA	NA
X100128320_TGI_at	100128320_TGI_at	NM_018099	FAR2	fatty acyl CoA reductase 2	5.67e-09	1.51956	0.0153076	1.21826	0.0334258	0.0217562	1.39491	0.0671649	0	0	NA	NA	NA
X100128350_TGI_at	100128350_TGI_at	N66243			1.39e-07	0.727785	0.0671758	0.874726	0.103447	0.132323	0.845893	0.242041	0	0	NA	NA	NA
X100128370_TGI_at	100128370_TGI_at	NM_017923	2011-03-01	membrane-associated ring finger (C3HC4) 1	1.51e-08	1.51239	0.00389894	1.282	0.0126041	0.0114202	1.40301	0.0432519	0	1	U2	U1	U1
X100128379_TGI_at	100128379_TGI_at	BU571191			4.33e-08	0.738005	0.484591	0.925895	0.525694	0.0572491	0.790136	0.133609	0	0	NA	NA	NA
X100128400_TGI_at	100128400_TGI_at	NM_032683		hypothetical protein MGC12972	6.1e-08	1.27625	0.857415	0.996108	0.870103	0.365926	1.0713	0.503363	0	0	NA	NA	NA
X100128411_TGI_at	100128411_TGI_at	NM_004104	FASN	fatty acid synthase	6.35e-12	1.37347	0.0280519	1.13696	0.0523516	0.00155839	1.45323	0.0123712	0	0	NA	NA	NA
X100128418_TGI_at	100128418_TGI_at	AL833212		hypothetical protein LOC286191	2.45e-07	0.747284	0.00434221	0.843736	0.0136403	0.00930352	0.740834	0.0380041	0	1	D2	D1	D1
X100128435_TGI_at	100128435_TGI_at	BC026299			5.49e-09	1.36566	0.0912966	1.10573	0.131185	0.00379721	1.4785	0.0211007	0	0	NA	NA	NA
X100128438_TGI_at	100128438_TGI_at	AK223417	ME1	malic enzyme 1, NADP(+)-dependent, cytosolic	1.35e-08	1.39269	0.00235267	1.25862	0.0088273	0.083538	1.26099	0.17511	0	0	NA	NA	NA
X100128449_TGI_at	100128449_TGI_at	NM_023926	ZSCAN18	zinc finger and SCAN domain containing 18	1.81e-08	0.788725	0.00478784	0.87465	0.0145853	0.152409	0.913142	0.268717	0	0	NA	NA	NA
X100128458_TGI_at	100128458_TGI_at	NM_001085423	C17orf60	chromosome 17 open reading frame 60	8.21e-11	1.57611	0.26525	1.09123	0.314532	0.0108553	1.32242	0.0419049	0	0	NA	NA	NA
X100128523_TGI_at	100128523_TGI_at	AK225124	GALNT6	UDP-N-acetyl-alpha-D-galactosamine:polypeptide N-acetylgalactosaminyltransferase 6 (GalNAc-T6)	3.97e-09	1.58141	0.155076	1.16109	0.200085	0.149505	1.17563	0.264175	0	0	NA	NA	NA
X100128527_TGI_at	100128527_TGI_at	AK024964	NFIA	nuclear factor I/A	2.15e-10	0.832318	0.0905348	0.930436	0.130333	0.870076	0.977636	0.924581	0	0	NA	NA	NA
X100128592_TGI_at	100128592_TGI_at	NM_015144	ZCCHC14	zinc finger, CCHC domain containing 14	3.02e-11	0.819248	0.327348	0.975486	0.375327	0.299374	0.937545	0.437986	0	0	NA	NA	NA
X100128601_TGI_at	100128601_TGI_at	NM_018125	ARHGEF10L	Rho guanine nucleotide exchange factor (GEF) 10-like	3.09e-10	1.36848	0.103333	1.09262	0.14455	0.374837	1.09989	0.511473	0	0	NA	NA	NA
X100128635_TGI_at	100128635_TGI_at	NM_001003792	RBMS3	RNA binding motif, single stranded interacting protein	1.18e-08	0.785418	0.00542123	0.876175	0.0159276	0.149505	0.900187	0.264175	0	0	NA	NA	NA
X100128639_TGI_at	100128639_TGI_at	BG716691	MACF1	microtubule-actin crosslinking factor 1	4.1e-12	0.775028	0.013452	0.918767	0.0303026	0.823249	0.997177	0.889186	0	0	NA	NA	NA
X100128644_TGI_at	100128644_TGI_at	NM_002423	MMP7	matrix metallopeptidase 7 (matrilysin, uterine)	1.06e-06	1.66655	0.000836876	1.57975	0.00433642	0.0365351	1.61354	0.0964394	0	0	NA	NA	NA
X100128713_TGI_at	100128713_TGI_at	NM_004957	FPGS	folylpolyglutamate synthase	8.92e-10	1.24977	0.344915	1.0401	0.392397	0.144787	1.09344	0.258531	0	0	NA	NA	NA
X100128729_TGI_at	100128729_TGI_at	NM_001042472	ABHD12	abhydrolase domain containing 12	5.64e-14	1.50464	0.00097408	1.16495	0.00474238	0.00264539	1.32764	0.0172244	0	1	U5	U1	U1
X100128750_TGI_at	100128750_TGI_at	ENST00000323669	DDHD1	DDHD domain containing 1	8.22e-11	1.45253	2.6e-06	1.32889	0.000115604	0.0380823	1.33585	0.0995452	0	0	NA	NA	NA
X100128767_TGI_at	100128767_TGI_at	NM_000066	C8B	complement component 8, beta polypeptide	9.95e-09	0.446808	0.025893	0.68819	0.0494683	0.590452	0.911605	0.709819	0	0	NA	NA	NA
X100128782_TGI_at	100128782_TGI_at	BM981759	OTUD7B	OTU domain containing 7B	2.14e-09	0.81688	0.05989	0.917798	0.0941177	0.583057	0.999883	0.704874	0	0	NA	NA	NA
X100128791_TGI_at	100128791_TGI_at	BC014528	ASB1	ankyrin repeat and SOCS box-containing 1	9.95e-09	1.25077	0.489693	1.04067	0.530336	0.221636	1.05945	0.351888	0	0	NA	NA	NA
X100128795_TGI_at	100128795_TGI_at	NM_018660	ZNF395	zinc finger protein 395	2.97e-09	0.821255	0.0233569	0.913352	0.045707	0.122858	0.913684	0.22915	0	0	NA	NA	NA
X100128796_TGI_at	100128796_TGI_at	NM_020335	VANGL2	vang-like 2 (van gogh, Drosophila)	1.36e-08	0.748199	0.584874	0.973981	0.619267	0.0293938	0.826047	0.0835417	0	0	NA	NA	NA
X100128799_TGI_at	100128799_TGI_at	NM_031471	FERMT3	fermitin family homolog 3 (Drosophila)	8.48e-11	1.47918	0.00410298	1.15227	0.0130542	0.000446526	1.34891	0.0060494	0	1	U1	U1	U1
X100128852_TGI_at	100128852_TGI_at	NM_006675	TSPAN9	tetraspanin 9	2.71e-11	0.761151	0.00185031	0.86344	0.0075617	0.200001	0.928131	0.328951	0	0	NA	NA	NA
X100128891_TGI_at	100128891_TGI_at	NM_003304	TRPC1	transient receptor potential cation channel, subfamily C, member 1	2.5e-10	0.713615	0.221471	0.961858	0.270585	0.0320831	0.767327	0.0883194	0	0	NA	NA	NA
X100128911_TGI_at	100128911_TGI_at	AA772427	GRK5	G protein-coupled receptor kinase 5	4e-07	0.786133	0.103915	0.918642	0.144736	0.0545005	1.25456	0.128784	0	0	NA	NA	NA
X100128941_TGI_at	100128941_TGI_at	NM_173502	PRSS36	protease, serine, 36	1.15e-09	1.34132	0.424269	1.03806	0.469259	0.0126269	1.22093	0.0464474	0	0	NA	NA	NA
X100128943_TGI_at	100128943_TGI_at	NM_031941	USHBP1	Usher syndrome 1C binding protein 1	1.23e-08	0.682146	0.00115177	0.766922	0.00533845	0.772133	0.996969	0.852547	0	0	NA	NA	NA
X100128959_TGI_at	100128959_TGI_at	DQ892055	DPT	dermatopontin	1.03e-10	0.594628	0.3731	0.837906	0.420308	0.515168	0.906151	0.649065	0	0	NA	NA	NA
X100128990_TGI_at	100128990_TGI_at	NM_002560	P2RX4	purinergic receptor P2X, ligand-gated ion channel, 4	3.39e-10	1.36034	0.584874	1.03929	0.619267	0.023488	1.23332	0.0704859	0	0	NA	NA	NA
X100129003_TGI_at	100129003_TGI_at	NM_198471	KANK3	KN motif and ankyrin repeat domains 3	7.92e-12	0.670528	0.000169682	0.789782	0.0014355	0.0399015	0.823017	0.101662	0	0	NA	NA	NA
X100129016_TGI_at	100129016_TGI_at	NM_004846	EIF4E2	eukaryotic translation initiation factor 4E family member 2	1.33e-09	1.22894	0.0130196	1.07278	0.0297353	0.0155172	1.14301	0.0529599	0	0	NA	NA	NA
X100129043_TGI_at	100129043_TGI_at	NM_002990	CCL22	chemokine (C-C motif) ligand 22	1.17e-12	2.01564	0.00215601	1.45788	0.00841892	0.0114604	1.4664	0.043353	0	1	U2	U1	U1
X100129078_TGI_at	100129078_TGI_at	NM_001449	FHL1	four and a half LIM domains 1	2.79e-07	0.814095	0.34164	0.966708	0.389948	0.096726	0.920521	0.193392	0	0	NA	NA	NA
X100129095_TGI_at	100129095_TGI_at	NM_148957	TNFRSF19	tumor necrosis factor receptor superfamily, member 19	2.88e-09	0.668452	0.013452	0.830962	0.0303026	0.0161366	0.769074	0.0547454	0	0	NA	NA	NA
X100129120_TGI_at	100129120_TGI_at	NM_003234	TFRC	transferrin receptor (p90, CD71)	1.61e-08	1.41822	1.55e-05	1.26639	0.000343627	0.0108068	1.34255	0.0419049	0	1	U2	U3	U1
X100129132_TGI_at	100129132_TGI_at	BM679607	TRMT6	tRNA methyltransferase 6 homolog (S. cerevisiae)	2.6e-07	1.29759	0.132098	1.09112	0.175785	0.159284	1.19508	0.276601	0	0	NA	NA	NA
X100129151_TGI_at	100129151_TGI_at	NM_012484	HMMR	hyaluronan-mediated motility receptor (RHAMM)	1.01e-06	1.58545	0.0385567	1.28497	0.0665248	0.162754	1.09589	0.281113	0	0	NA	NA	NA
X100129173_TGI_at	100129173_TGI_at	NM_014614	PSME4	proteasome (prosome, macropain) activator subunit 4	7.65e-10	1.2417	0.00910457	1.07911	0.0230544	0.440813	1.046	0.578713	0	0	NA	NA	NA
X100129176_TGI_at	100129176_TGI_at	AK226124	CTNND2	catenin (cadherin-associated protein), delta 2 (neural plakophilin-related arm-repeat protein)	5.58e-12	0.586487	0.151033	0.844246	0.19565	0.0967262	1.36851	0.193392	0	0	NA	NA	NA
X100129180_TGI_at	100129180_TGI_at	NM_145871	GSTZ1	glutathione transferase zeta 1	2.58e-08	1.24916	0.167986	1.07814	0.213746	0.0114202	1.17869	0.0432519	0	0	NA	NA	NA
X100129197_TGI_at	100129197_TGI_at	NM_052839	PANX2	pannexin 2	6.14e-11	1.64581	0.00314995	1.25237	0.0108581	0.0108553	1.22622	0.0419049	0	1	U1	U1	U1
X100129200_TGI_at	100129200_TGI_at	NM_021146	ANGPTL7	angiopoietin-like 7	7.53e-12	0.563297	0.0049616	0.759285	0.0150577	0.11544	0.857931	0.219636	0	0	NA	NA	NA
X100129230_TGI_at	100129230_TGI_at	NM_018212	ENAH	enabled homolog (Drosophila)	2.4e-11	0.75343	0.0028045	0.850744	0.00995474	0.579048	0.929513	0.700553	0	0	NA	NA	NA
X100129234_TGI_at	100129234_TGI_at	AI822141	CCBE1	collagen and calcium binding EGF domains 1	1.64e-07	0.731571	0.0417248	0.792521	0.0706297	0.0931708	1.29084	0.188857	0	0	NA	NA	NA
X100129242_TGI_at	100129242_TGI_at	BC111089			1.6e-10	1.51467	0.0243478	1.14854	0.0473014	0.00930352	1.28832	0.0380041	0	1	U2	U1	U1
X100129257_TGI_at	100129257_TGI_at	NM_080725	SRXN1	sulfiredoxin 1 homolog (S. cerevisiae)	5.16e-08	1.35515	0.00203367	1.19201	0.00809608	0.00128494	1.32702	0.0110437	0	1	U1	U1	U1
X100129261_TGI_at	100129261_TGI_at	ENST00000375250	ARHGAP12	Rho GTPase activating protein 12	1.2e-06	0.799139	0.716068	0.978744	0.740657	0.0313821	0.882731	0.0874953	0	0	NA	NA	NA
X100129264_TGI_at	100129264_TGI_at	CN292360	FAM89A	family with sequence similarity 89, member A	5.42e-10	1.46148	0.0128136	1.1956	0.0293561	0.0171191	1.33341	0.0569401	0	0	NA	NA	NA
X100129269_TGI_at	100129269_TGI_at	BC101550	TPRG1	tumor protein p63 regulated 1	3.44e-11	1.39853	1.36e-06	1.34529	7.66e-05	0.106626	1.12171	0.208175	0	0	NA	NA	NA
X100129292_TGI_at	100129292_TGI_at	NM_007113	TCHH	trichohyalin	7.66e-08	1.53124	1.05e-06	1.5112	6.67e-05	0.780652	1.03254	0.859891	0	0	NA	NA	NA
X100129302_TGI_at	100129302_TGI_at	AK023266	MOBKL2B	MOB1, Mps One Binder kinase activator-like 2B (yeast)	5.62e-12	1.42927	0.00371782	1.23433	0.0122271	0.0108553	1.23686	0.0419049	0	1	U2	U1	U1
X100129312_TGI_at	100129312_TGI_at	NM_003637	ITGA10	integrin, alpha 10	5.36e-12	0.604615	0.000589932	0.738464	0.00341356	0.0390467	0.673013	0.101245	0	0	NA	NA	NA
X100129324_TGI_at	100129324_TGI_at	NM_053054	CATSPER1	cation channel, sperm associated 1	1.58e-13	1.74789	0.000316514	1.33528	0.00219382	0.002062	1.45747	0.0149688	0	1	U1	U1	U1
X100129328_TGI_at	100129328_TGI_at	NM_031301	APH1B	anterior pharynx defective 1 homolog B (C. elegans)	2.79e-14	1.39587	0.0139215	1.08218	0.0310511	7.79e-05	1.27434	0.0027274	0	1	U6	U1	U1
X100129335_TGI_at	100129335_TGI_at	BX103595	ITPR2	inositol 1,4,5-triphosphate receptor, type 2	3.88e-13	3.54651	2.39e-08	2.78511	5.14e-06	0.00589173	1.62492	0.0278024	0	1	U1	U2	U1
X100129344_TGI_at	100129344_TGI_at	NM_000577	IL1RN	interleukin 1 receptor antagonist	2.96e-09	1.76355	0.0870255	1.21568	0.126287	0.00344672	1.65106	0.0196615	0	0	NA	NA	NA
X100129357_TGI_at	100129357_TGI_at	NM_003982	SLC7A7	solute carrier family 7 (cationic amino acid transporter, y+ system), member 7	2.58e-12	1.35646	0.0693598	1.10315	0.105946	0.00195045	1.36252	0.0144513	0	0	NA	NA	NA
X100129366_TGI_at	100129366_TGI_at	NM_020813	ZNF471	zinc finger protein 471	7.23e-08	0.763974	0.00672285	0.857023	0.0185671	0.0320831	0.837233	0.0883194	0	0	NA	NA	NA
X100129372_TGI_at	100129372_TGI_at	NM_197948	CLEC7A	C-type lectin domain family 7, member A	2.62e-12	1.35198	0.0306347	1.12077	0.0559091	0.0108553	1.26639	0.0419049	0	0	NA	NA	NA
X100129373_TGI_at	100129373_TGI_at	NM_000499	CYP1A1	cytochrome P450, family 1, subfamily A, polypeptide 1	2.43e-14	2.33569	0.000640844	1.87795	0.00362609	0.0538877	1.21499	0.127894	0	0	NA	NA	NA
X100129382_TGI_at	100129382_TGI_at	CA429938			8.48e-10	0.698894	0.00519022	0.803939	0.015489	0.450742	0.926247	0.587204	0	0	NA	NA	NA
X100129386_TGI_at	100129386_TGI_at	BC017327	FERMT2	fermitin family homolog 2 (Drosophila)	8.39e-10	0.773816	0.128323	0.91474	0.171612	0.119496	0.900135	0.225095	0	0	NA	NA	NA
X100129397_TGI_at	100129397_TGI_at	NM_013449	BAZ2A	bromodomain adjacent to zinc finger domain, 2A	2.01e-08	0.812443	0.0262366	0.893649	0.0499299	0.164347	1.13119	0.282652	0	0	NA	NA	NA
X100129421_TGI_at	100129421_TGI_at	NM_001098797	TOX2	TOX high mobility group box family member 2	4.42e-07	0.715957	2.84e-05	0.780858	0.000484115	0.30723	0.830199	0.44644	0	0	NA	NA	NA
X100129425_TGI_at	100129425_TGI_at	BC009467		hypothetical protein BC009467	6.14e-11	1.30672	0.324733	1.05723	0.372859	0.122858	1.17013	0.22915	0	0	NA	NA	NA
X100129464_TGI_at	100129464_TGI_at	J05593	TIMP2	TIMP metallopeptidase inhibitor 2	1.05e-09	1.54192	0.0299565	1.14144	0.0549828	0.00023763	1.41095	0.0044528	0	0	NA	NA	NA
X100129540_TGI_at	100129540_TGI_at	BF115745			1.39e-08	0.815182	0.0251452	0.922602	0.0483838	0.635604	0.985951	0.747431	0	0	NA	NA	NA
X100129548_TGI_at	100129548_TGI_at	NM_001080779	MYO1C	myosin IC	8.71e-07	0.805906	0.000428415	0.84641	0.00272343	0.0864563	1.10303	0.179492	0	0	NA	NA	NA
X100129555_TGI_at	100129555_TGI_at	NM_175610	TJP1	tight junction protein 1 (zona occludens 1)	5.13e-10	0.814491	0.0773935	0.959876	0.114737	0.502203	0.976186	0.637495	0	0	NA	NA	NA
X100129596_TGI_at	100129596_TGI_at	NM_001085451	LNP1	leukemia NUP98 fusion partner 1	3.12e-07	0.766782	0.119221	0.894182	0.161314	0.234598	0.923541	0.367043	0	0	NA	NA	NA
X100129602_TGI_at	100129602_TGI_at	NM_001033044	GLUL	glutamate-ammonia ligase (glutamine synthetase)	4.07e-10	1.44807	0.136866	1.15541	0.180713	0.0380823	1.29863	0.0995452	0	0	NA	NA	NA
X100129656_TGI_at	100129656_TGI_at	NM_020166	MCCC1	methylcrotonoyl-Coenzyme A carboxylase 1 (alpha)	3.5e-12	1.3157	4.43e-05	1.22214	0.000631699	0.0028869	1.29171	0.0178932	0	1	U2	U1	U1
X100129670_TGI_at	100129670_TGI_at	ENST00000352732	ABHD2	abhydrolase domain containing 2	1.54e-11	1.46213	0.0116318	1.16594	0.0272773	0.00166052	1.34288	0.0128961	0	1	U1	U1	U1
X100129691_TGI_at	100129691_TGI_at	NM_018129	PNPO	pyridoxamine 5';-phosphate oxidase	7.47e-07	1.27917	0.0245644	1.10615	0.0475787	0.0668422	1.15094	0.148369	0	0	NA	NA	NA
X100129742_TGI_at	100129742_TGI_at	NM_032866	CGNL1	cingulin-like 1	2.97e-09	0.829152	0.0354953	0.914483	0.0624461	0.203149	1.19325	0.330515	0	0	NA	NA	NA
X100129744_TGI_at	100129744_TGI_at	NM_153326	AKR1A1	aldo-keto reductase family 1, member A1 (aldehyde reductase)	1.77e-11	1.22744	0.104408	1.0446	0.14536	0.00365367	1.131	0.0205608	0	0	NA	NA	NA
X100129781_TGI_at	100129781_TGI_at	ENST00000381322	CLOCK	clock homolog (mouse)	2.18e-07	1.23243	0.411106	1.02337	0.45658	0.00459597	1.1739	0.0238532	0	0	NA	NA	NA
X100129784_TGI_at	100129784_TGI_at	NM_014992	DAAM1	dishevelled associated activator of morphogenesis 1	1.11e-07	0.792264	0.000404769	0.892939	0.0026355	0.462144	0.941967	0.598429	0	0	NA	NA	NA
X100129867_TGI_at	100129867_TGI_at	NM_181785	SLC46A3	solute carrier family 46, member 3	2.92e-11	1.33924	9.66e-07	1.23205	6.63e-05	0.274492	1.08639	0.411866	0	0	NA	NA	NA
X100129877_TGI_at	100129877_TGI_at	ENST00000222690	H2AFV	H2A histone family, member V	3.78e-09	0.810409	0.601941	0.962324	0.635876	0.579048	0.973886	0.700553	0	0	NA	NA	NA
X100129909_TGI_at	100129909_TGI_at	AF151858	TMED5	transmembrane emp24 protein transport domain containing 5	6.17e-10	1.34026	0.016882	1.10606	0.035962	0.000656787	1.31093	0.00742745	0	1	U2	U1	U1
X100129915_TGI_at	100129915_TGI_at	NM_001033047	NPNT	nephronectin	1.68e-13	0.740484	0.0748193	0.934847	0.112003	0.843026	0.996949	0.905389	0	0	NA	NA	NA
X100129925_TGI_at	100129925_TGI_at	NM_005399	PRKAB2	protein kinase, AMP-activated, beta 2 non-catalytic subunit	4.13e-07	0.79379	0.379278	0.95501	0.426523	0.173608	0.901319	0.296679	0	0	NA	NA	NA
X100129931_TGI_at	100129931_TGI_at	ENST00000377058	CXorf24	chromosome X open reading frame 24	6e-08	0.80886	0.238892	0.940391	0.287838	0.442606	0.936867	0.57965	0	0	NA	NA	NA
X100129938_TGI_at	100129938_TGI_at	NM_013231	FLRT2	fibronectin leucine rich transmembrane protein 2	5.84e-08	0.670322	0.214903	0.839245	0.263912	0.024581	0.740231	0.0729509	0	0	NA	NA	NA
X100129969_TGI_at	100129969_TGI_at	NM_021097	SLC8A1	solute carrier family 8 (sodium/calcium exchanger), member 1	3.12e-07	1.24944	0.0214632	1.12373	0.0430733	0.348497	1.08823	0.486869	0	0	NA	NA	NA
X100129979_TGI_at	100129979_TGI_at	NM_005471	GNPDA1	glucosamine-6-phosphate deaminase 1	2.08e-11	1.29493	0.0264432	1.09238	0.0501627	0.089895	1.14321	0.184145	0	0	NA	NA	NA
X100129997_TGI_at	100129997_TGI_at	NM_006994	BTN3A3	butyrophilin, subfamily 3, member A3	1.08e-08	0.777585	0.13328	0.934455	0.17692	0.88364	0.99875	0.933455	0	0	NA	NA	NA
X100130009_TGI_at	100130009_TGI_at	NM_014038	BZW2	basic leucine zipper and W2 domains 2	9.34e-11	1.25129	0.00337186	1.1101	0.0114035	0.10722	1.17506	0.208175	0	0	NA	NA	NA
X100130024_TGI_at	100130024_TGI_at	NM_005964	MYH10	myosin, heavy chain 10, non-muscle	4.66e-11	0.789909	0.576526	1.00001	0.611634	0.0488071	0.890944	0.118721	0	0	NA	NA	NA
X100130034_TGI_at	100130034_TGI_at	NM_016310	POLR3K	polymerase (RNA) III (DNA directed) polypeptide K, 12.3 kDa	1.48e-07	1.22262	0.0167851	1.10692	0.0358267	0.418053	1.06922	0.560243	0	0	NA	NA	NA
X100130036_TGI_at	100130036_TGI_at	BC021675	TSPAN2	tetraspanin 2	7.06e-08	0.719865	0.0630447	0.838389	0.0978708	0.00883112	0.742952	0.0369645	0	0	NA	NA	NA
X100130054_TGI_at	100130054_TGI_at	NM_001080545	PPP1R1C	protein phosphatase 1, regulatory (inhibitor) subunit 1C	3.54e-14	2.3772	1.16e-05	1.86173	0.000294785	0.000297835	1.9706	0.0048727	0	1	U4	U2	U1
X100130055_TGI_at	100130055_TGI_at	DA393531	LIPA	lipase A, lysosomal acid, cholesterol esterase	1.4e-12	2.15939	0.000122768	1.57776	0.00118828	0.000429707	2.18106	0.00589339	0	1	U5	U1	U1
X100130076_TGI_at	100130076_TGI_at	NM_000837	GRINA	glutamate receptor, ionotropic, N-methyl D-aspartate-associated protein 1 (glutamate binding)	3.79e-11	1.31435	0.493672	1.01329	0.53357	0.00365367	1.21299	0.0205608	0	0	NA	NA	NA
X100130080_TGI_at	100130080_TGI_at	NM_021734	SLC25A19	solute carrier family 25 (mitochondrial thiamine pyrophosphate carrier), member 19	6.5e-11	1.4695	1.43e-05	1.25324	0.000331475	0.0126963	1.27474	0.0464474	0	1	U1	U2	U1
X100130092_TGI_at	100130092_TGI_at	NM_000609	CXCL12	chemokine (C-X-C motif) ligand 12 (stromal cell-derived factor 1)	2.26e-09	0.622307	0.492987	0.927956	0.533187	0.024581	0.696727	0.0729509	0	0	NA	NA	NA
X100130110_TGI_at	100130110_TGI_at	AF038185			1.9e-08	0.671001	0.00449982	0.799183	0.0140396	0.0155445	0.765878	0.0529599	0	0	NA	NA	NA
X100130123_TGI_at	100130123_TGI_at	ENST00000253707	SLC6A6	solute carrier family 6 (neurotransmitter transporter, taurine), member 6	4.47e-10	1.37386	0.0264362	1.13389	0.0501627	0.337688	1.11957	0.479457	0	0	NA	NA	NA
X100130150_TGI_at	100130150_TGI_at	U48296	PTP4A1	protein tyrosine phosphatase type IVA, member 1	6.86e-08	1.30207	0.00770199	1.11475	0.0204984	0.180248	1.10929	0.304954	0	0	NA	NA	NA
X100130164_TGI_at	100130164_TGI_at	NM_001040409	MTHFD2	methylenetetrahydrofolate dehydrogenase (NADP+ dependent) 2, methenyltetrahydrofolate cyclohydrolase	2.21e-10	1.55694	0.0576161	1.13851	0.0912514	0.849099	1.0286	0.906475	0	0	NA	NA	NA
X100130174_TGI_at	100130174_TGI_at	BC039435	UBE2F	ubiquitin-conjugating enzyme E2F (putative)	1.88e-15	1.38514	0.468713	1.02469	0.510704	0.225307	1.06661	0.356838	0	0	NA	NA	NA
X100130182_TGI_at	100130182_TGI_at	ENST00000381414	TMC5	transmembrane channel-like 5	3.55e-07	1.37891	0.255546	1.07522	0.30437	0.0867106	1.1623	0.179492	0	0	NA	NA	NA
X100130186_TGI_at	100130186_TGI_at	NM_032857	LACTB	lactamase, beta	1.01e-06	1.37119	0.00623701	1.17902	0.0175562	0.00271917	1.40732	0.0172517	0	1	U1	U1	U1
X100130192_TGI_at	100130192_TGI_at	NM_001188	BAK1	BCL2-antagonist/killer 1	7.47e-07	1.20106	0.693227	0.996567	0.720787	0.000446526	1.29221	0.0060494	0	0	NA	NA	NA
X100130232_TGI_at	100130232_TGI_at	NM_138957	MAPK1	mitogen-activated protein kinase 1	8.34e-07	1.3286	0.930723	0.998697	0.936827	0.00919586	1.27581	0.0380041	0	0	NA	NA	NA
X100130258_TGI_at	100130258_TGI_at	NM_001337	CX3CR1	chemokine (C-X3-C motif) receptor 1	1.05e-11	0.516611	0.0883945	0.857013	0.127813	0.579048	1.14192	0.700553	0	0	NA	NA	NA
X100130266_TGI_at	100130266_TGI_at	NM_001859	SLC31A1	solute carrier family 31 (copper transporters), member 1	4.06e-16	1.70712	0.00174633	1.21887	0.00730076	0.000345371	1.46602	0.00530062	0	1	U2	U1	U1
X100130282_TGI_at	100130282_TGI_at	NM_025074	FRAS1	Fraser syndrome 1	1.78e-09	0.700438	0.0934945	0.850383	0.133569	0.320447	0.890652	0.461484	0	0	NA	NA	NA
X100130288_TGI_at	100130288_TGI_at	NM_005202	COL8A2	collagen, type VIII, alpha 2	5.82e-16	2.00404	1.75e-06	1.51171	9.27e-05	0.00622491	1.369	0.0287023	0	1	U1	U1	U1
X100130305_TGI_at	100130305_TGI_at	NM_025144	ALPK1	alpha-kinase 1	4.42e-13	1.42091	0.000169682	1.16231	0.0014355	0.849099	1.02521	0.906475	0	0	NA	NA	NA
X100130312_TGI_at	100130312_TGI_at	NM_004095	EIF4EBP1	eukaryotic translation initiation factor 4E binding protein 1	7.58e-14	1.53634	0.0380379	1.11163	0.065912	0.149505	1.13358	0.264175	0	0	NA	NA	NA
X100130334_TGI_at	100130334_TGI_at	NM_020809	ARHGAP20	Rho GTPase activating protein 20	9.64e-08	0.769936	0.221368	0.931919	0.270566	0.709599	0.954948	0.803598	0	0	NA	NA	NA
X100130349_TGI_at	100130349_TGI_at	ENST00000313060		FP2025	1.73e-08	0.683443	0.000203273	0.730237	0.00164044	0.940656	1.02186	0.965521	0	0	NA	NA	NA
X100130355_TGI_at	100130355_TGI_at	AI417595			2.35e-08	0.588971	0.0325982	0.808944	0.0584337	0.927501	0.87742	0.959351	0	0	NA	NA	NA
X100130393_TGI_at	100130393_TGI_at	NM_199331	HOMER2	homer homolog 2 (Drosophila)	1.57e-07	1.45849	0.056169	1.14861	0.0896348	0.0139424	1.30302	0.0496534	0	0	NA	NA	NA
X100130396_TGI_at	100130396_TGI_at	AK126467	PDE1C	phosphodiesterase 1C, calmodulin-dependent 70kDa	1.61e-10	0.713464	0.0485645	0.896988	0.0796962	0.940656	1.00803	0.965521	0	0	NA	NA	NA
X100130406_TGI_at	100130406_TGI_at	NM_007195	POLI	polymerase (DNA directed) iota	1.67e-07	0.746762	0.441839	0.949926	0.485691	0.926061	0.96953	0.959351	0	0	NA	NA	NA
X100130415_TGI_at	100130415_TGI_at	NM_016500	CXorf26	chromosome X open reading frame 26	2.54e-10	1.21872	0.0512129	1.05428	0.0831532	0.00402736	1.17895	0.0219631	0	0	NA	NA	NA
X100130496_TGI_at	100130496_TGI_at	BC110332	ZNF507	zinc finger protein 507	7.13e-07	0.823345	0.0282528	0.907706	0.0526352	0.241272	0.868688	0.374576	0	0	NA	NA	NA
X100130520_TGI_at	100130520_TGI_at	NM_000509	FGG	fibrinogen gamma chain	4.74e-14	9.50695	0.000124125	2.60188	0.00119419	0.0010641	2.53958	0.0097471	0	1	U8	U1	U1
X100130524_TGI_at	100130524_TGI_at	AK056826			3.32e-16	3.39304	1.62e-12	3.54539	2.61e-09	3.44e-06	2.75081	0.000832852	1	1	U7	U4	U3
X100130545_TGI_at	100130545_TGI_at	BC009478	DCUN1D1	DCN1, defective in cullin neddylation 1, domain containing 1 (S. cerevisiae)	2.27e-09	1.30202	0.000626754	1.17743	0.00355639	0.337688	1.07637	0.479457	0	0	NA	NA	NA
X100130551_TGI_at	100130551_TGI_at	AF506757	AIFM2	apoptosis-inducing factor, mitochondrion-associated, 2	8.22e-11	1.42317	0.000437317	1.21114	0.00276055	0.0153743	1.17214	0.0529599	0	0	NA	NA	NA
X100130566_TGI_at	100130566_TGI_at	BC047374	SLC36A4	solute carrier family 36 (proton/amino acid symporter), member 4	2.63e-09	1.42021	0.00443173	1.17847	0.0138674	0.234598	1.13361	0.367043	0	0	NA	NA	NA
X100130580_TGI_at	100130580_TGI_at	NM_058195	CDKN2A	cyclin-dependent kinase inhibitor 2A (melanoma, p16, inhibits CDK4)	2.64e-10	1.64893	6.51e-08	1.67615	9.69e-06	0.0320831	1.34553	0.0883194	0	0	NA	NA	NA
X100130599_TGI_at	100130599_TGI_at	NM_005128	DOPEY2	dopey family member 2	2.02e-09	1.28226	0.0227967	1.11717	0.0451313	0.348497	1.07068	0.486869	0	0	NA	NA	NA
X100130604_TGI_at	100130604_TGI_at	AB089319	NIPA1	non imprinted in Prader-Willi/Angelman syndrome 1	1.79e-07	1.35669	0.29919	1.05733	0.348623	0.0550347	1.14388	0.129378	0	0	NA	NA	NA
X100130626_TGI_at	100130626_TGI_at	BX538111		hypothetical protein LOC283904	1.35e-07	0.688112	0.0305975	0.802235	0.0559047	0.924556	0.987945	0.959351	0	0	NA	NA	NA
X100130660_TGI_at	100130660_TGI_at	BC020911			1.98e-11	0.733945	0.404617	0.956058	0.450304	0.754854	1.10226	0.840088	0	0	NA	NA	NA
X100130675_TGI_at	100130675_TGI_at	NM_003263	TLR1	toll-like receptor 1	4.2e-10	1.38883	0.0231411	1.128	0.0454225	0.299374	1.16479	0.437986	0	0	NA	NA	NA
X100130701_TGI_at	100130701_TGI_at	BC002480	SRD5A3	steroid 5 alpha-reductase 3	2.92e-11	1.42715	0.0303588	1.11268	0.0554999	0.234598	1.12966	0.367043	0	0	NA	NA	NA
X100130704_TGI_at	100130704_TGI_at	AF010236			3.76e-10	0.690164	0.0175305	0.80324	0.0368083	0.470968	0.927869	0.606929	0	0	NA	NA	NA
X100130706_TGI_at	100130706_TGI_at	H51497	MAPRE2	microtubule-associated protein, RP/EB family, member 2	2.48e-10	0.783487	0.0132286	0.855375	0.0300475	0.979396	0.987122	0.987557	0	0	NA	NA	NA
X100130725_TGI_at	100130725_TGI_at	NM_080548	PTPN6	protein tyrosine phosphatase, non-receptor type 6	1.76e-10	1.37576	0.0177674	1.11725	0.0372086	0.0219647	1.24974	0.0675498	0	0	NA	NA	NA
X100130728_TGI_at	100130728_TGI_at	ENST00000359203	RRAGD	Ras-related GTP binding D	6.12e-17	1.61031	1.76e-05	1.30123	0.000366485	0.00837977	1.35926	0.0357249	0	1	U6	U1	U1
X100130731_TGI_at	100130731_TGI_at	AK000969	KLF7	Kruppel-like factor 7 (ubiquitous)	1.69e-09	0.795972	0.01573	0.904093	0.034117	0.784831	0.982244	0.86155	0	0	NA	NA	NA
X100130756_TGI_at	100130756_TGI_at	NM_170692	RASAL2	RAS protein activator like 2	1.06e-07	1.2644	0.00161605	1.19136	0.00686584	0.0741753	1.16288	0.161423	0	0	NA	NA	NA
X100130761_TGI_at	100130761_TGI_at	AF062481	DHCR7	7-dehydrocholesterol reductase	2.74e-10	1.43073	0.22801	1.08998	0.276582	0.000806993	1.55905	0.00825695	0	0	NA	NA	NA
X100130766_TGI_at	100130766_TGI_at	AF230393	TRIM27	tripartite motif-containing 27	6.48e-09	1.28543	0.188471	1.04597	0.236635	0.0132706	1.16069	0.0481115	0	0	NA	NA	NA
X100130774_TGI_at	100130774_TGI_at	NM_013343	LOH3CR2A	loss of heterozygosity, 3, chromosomal region 2, gene A	4.65e-07	0.666224	0.0107309	0.816333	0.0258487	0.759495	1.03323	0.842345	0	0	NA	NA	NA
X100130832_TGI_at	100130832_TGI_at	NM_138804	C2orf65	chromosome 2 open reading frame 65	2.4e-14	2.3765	5.98e-07	1.80479	4.7e-05	3e-05	1.90385	0.0018051	0	1	U5	U2	U1
X100130854_TGI_at	100130854_TGI_at	ENST00000362010	VEPH1	ventricular zone expressed PH domain homolog 1 (zebrafish)	1.41e-07	1.23499	0.0138733	1.17227	0.0310006	0.0163491	1.50681	0.0552339	0	0	NA	NA	NA
X100130907_TGI_at	100130907_TGI_at	DQ457059			6.45e-10	1.22781	0.00793404	1.10103	0.0209602	0.25501	1.05883	0.38934	0	0	NA	NA	NA
X100130932_TGI_at	100130932_TGI_at	L25259	CD86	CD86 molecule	6.29e-14	1.75574	0.000109657	1.38373	0.0010942	0.00870747	1.47631	0.0369265	0	1	U6	U3	U1
X100130993_TGI_at	100130993_TGI_at	NM_024829		hypothetical protein FLJ22662	2.9e-12	1.54148	2.34e-05	1.31029	0.000435318	0.000256336	1.63463	0.00460016	0	1	U2	U2	U1
X100130995_TGI_at	100130995_TGI_at	BC000049	TMEM38B	transmembrane protein 38B	1.39e-09	1.39212	0.00326883	1.24019	0.0111841	0.289772	1.10808	0.428608	0	0	NA	NA	NA
X100131018_TGI_at	100131018_TGI_at	ENST00000367853	MPZL1	myelin protein zero-like 1	1.31e-07	1.22448	0.0554288	1.074	0.0886147	0.0806094	1.11581	0.170587	0	0	NA	NA	NA
X100131077_TGI_at	100131077_TGI_at	NM_016245	HSD17B11	hydroxysteroid (17-beta) dehydrogenase 11	2.37e-10	1.25609	2.86e-05	1.15236	0.000484849	0.00750014	1.22034	0.0330232	0	1	U3	U2	U1
X100131087_TGI_at	100131087_TGI_at	AB208946	ALOX5	arachidonate 5-lipoxygenase	9.94e-12	1.73101	0.0022445	1.28136	0.00859149	0.000371641	1.75773	0.00537129	0	1	U2	U1	U1
X100131098_TGI_at	100131098_TGI_at	NM_019063	EML4	echinoderm microtubule associated protein like 4	4.46e-11	1.2624	0.00260307	1.1466	0.0094585	0.00794871	1.17607	0.0343414	0	1	U2	U1	U1
X100131136_TGI_at	100131136_TGI_at	AK091196	ARHGAP24	Rho GTPase activating protein 24	2.48e-11	0.798327	0.00972665	0.915336	0.024189	0.806688	1.04177	0.879552	0	0	NA	NA	NA
X100131143_TGI_at	100131143_TGI_at	BC012049	CYP1B1	cytochrome P450, family 1, subfamily B, polypeptide 1	6.12e-20	4.00684	3.3e-11	2.56533	2.13e-08	0.00337162	1.61106	0.0196505	0	1	U8	U4	U1
X100131149_TGI_at	100131149_TGI_at	NM_024901	DENND2D	DENN/MADD domain containing 2D	3.28e-10	1.32317	0.0381333	1.0891	0.0660063	0.0305083	1.21867	0.0860038	0	0	NA	NA	NA
X100131156_TGI_at	100131156_TGI_at	BX119451			1.92e-07	1.84422	0.140775	1.28812	0.184663	1.72e-05	2.22543	0.0017496	0	0	NA	NA	NA
X100131174_TGI_at	100131174_TGI_at	ENST00000179259	C12orf5	chromosome 12 open reading frame 5	1.7e-13	1.65589	3.46e-05	1.33872	0.000541936	0.000469144	1.34891	0.00612166	0	1	U2	U2	U1
X100131211_TGI_at	100131211_TGI_at	AK001074			1.79e-09	0.655754	0.14859	0.812619	0.193029	0.284058	1.15651	0.421122	0	0	NA	NA	NA
X100131212_TGI_at	100131212_TGI_at	NM_012396	PHLDA3	pleckstrin homology-like domain, family A, member 3	6.52e-13	1.54641	0.00910589	1.1985	0.0230544	0.00233749	1.41174	0.0160634	0	1	U4	U1	U1
X100131218_TGI_at	100131218_TGI_at	NM_003370	VASP	vasodilator-stimulated phosphoprotein	3.04e-08	1.38461	0.279577	1.08476	0.328381	0.107896	1.19805	0.208857	0	0	NA	NA	NA
X100131223_TGI_at	100131223_TGI_at	NM_006344	CLEC10A	C-type lectin domain family 10, member A	1.25e-10	1.46385	0.0231411	1.22887	0.0454225	0.00543765	1.36077	0.0261966	0	1	U1	U1	U1
X100131228_TGI_at	100131228_TGI_at	NM_020779	WDR35	WD repeat domain 35	4.11e-07	0.821268	0.0380271	0.898253	0.065912	0.00053236	0.770763	0.0066493	0	0	NA	NA	NA
X100131287_TGI_at	100131287_TGI_at	NM_032463	LAT2	linker for activation of T cells family, member 2	5.77e-12	1.43398	0.11456	1.0814	0.155791	0.0209285	1.24631	0.0654244	0	0	NA	NA	NA
X100131294_TGI_at	100131294_TGI_at	NM_144956	PRSS21	protease, serine, 21 (testisin)	2.83e-11	2.91353	0.0001118	1.87781	0.00110964	0.0164729	1.73626	0.0555939	0	0	NA	NA	NA
X100131298_TGI_at	100131298_TGI_at	BC000948	TMEM33	transmembrane protein 33	1.77e-10	1.478	0.00737609	1.1909	0.019844	0.0217562	1.27182	0.0671649	0	0	NA	NA	NA
X100131312_TGI_at	100131312_TGI_at	NM_000397	CYBB	cytochrome b-245, beta polypeptide	8.07e-15	2.13193	0.000233003	1.44151	0.00180956	7.79e-05	2.00896	0.0027274	0	1	U8	U2	U1
X100131328_TGI_at	100131328_TGI_at	NM_207309	UAP1L1	UDP-N-acteylglucosamine pyrophosphorylase 1-like 1	1.96e-09	1.37801	0.995376	1.00177	0.995994	0.0965397	1.19365	0.193392	0	0	NA	NA	NA
X100131330_TGI_at	100131330_TGI_at	NM_018231	SLC38A7	solute carrier family 38, member 7	4.92e-07	1.30184	0.226233	1.0661	0.27515	0.0668422	1.19318	0.148369	0	0	NA	NA	NA
X100131355_TGI_at	100131355_TGI_at	AL532155	FAM13C1	family with sequence similarity 13, member C1	2.78e-08	0.739059	0.00684681	0.820903	0.0188287	0.374837	0.924035	0.511473	0	0	NA	NA	NA
X100131375_TGI_at	100131375_TGI_at	NM_153211	TTC39C	tetratricopeptide repeat domain 39C	1.58e-10	1.36081	0.010718	1.11078	0.0258487	0.357146	1.10047	0.494451	0	0	NA	NA	NA
X100131378_TGI_at	100131378_TGI_at	NM_017872	THG1L	tRNA-histidine guanylyltransferase 1-like (S. cerevisiae)	6.38e-11	1.21638	0.00848957	1.09419	0.0219774	0.00563515	1.2105	0.0269868	0	1	U1	U1	U1
X100131379_TGI_at	100131379_TGI_at	AK056079	JAM2	junctional adhesion molecule 2	2.02e-10	0.734195	0.0424425	0.937168	0.0714693	0.00388342	0.778439	0.0213588	0	0	NA	NA	NA
X100131387_TGI_at	100131387_TGI_at	NM_005601	NKG7	natural killer cell group 7 sequence	1.48e-08	0.650406	0.0220625	0.809412	0.0440566	0.993131	1.00478	0.995253	0	0	NA	NA	NA
X100131403_TGI_at	100131403_TGI_at	BQ441651			8.49e-11	1.4744	0.112642	1.07839	0.153702	0.422375	1.1116	0.560905	0	0	NA	NA	NA
X100131417_TGI_at	100131417_TGI_at	NM_002522	NPTX1	neuronal pentraxin I	2.62e-13	2.09291	2.27e-05	1.90446	0.000427646	0.0320552	1.60333	0.0883194	0	0	NA	NA	NA
X100131453_TGI_at	100131453_TGI_at	NM_001031679	MSRB3	methionine sulfoxide reductase B3	1.01e-09	0.738534	0.255546	0.934168	0.30437	0.0508153	0.817781	0.122313	0	0	NA	NA	NA
X100131473_TGI_at	100131473_TGI_at	NM_153026	PRICKLE1	prickle homolog 1 (Drosophila)	5.26e-07	0.762783	0.208672	0.909665	0.25788	0.660414	0.894112	0.764285	0	0	NA	NA	NA
X100131488_TGI_at	100131488_TGI_at	NM_203308		ribosomal protein L13A pseudogene	7.71e-11	2.57274	1.1e-05	2.32656	0.000288889	3.49e-05	2.8514	0.0018051	0	1	U6	U1	U2
X100131490_TGI_at	100131490_TGI_at	NM_022003	FXYD6	FXYD domain containing ion transport regulator 6	1.28e-09	0.783536	0.0180479	0.915615	0.037625	0.54546	0.952246	0.674087	0	0	NA	NA	NA
X100131505_TGI_at	100131505_TGI_at	BC025246	ME1	malic enzyme 1, NADP(+)-dependent, cytosolic	4.64e-08	1.3462	0.00030308	1.25951	0.00212817	0.0180658	1.28278	0.0588142	0	0	NA	NA	NA
X100131522_TGI_at	100131522_TGI_at	AK095776	THRB	thyroid hormone receptor, beta (erythroblastic leukemia viral (v-erb-a) oncogene homolog 2, avian)	7.7e-07	0.81897	0.0770507	0.927594	0.114387	0.235851	0.848426	0.368289	0	0	NA	NA	NA
X100131545_TGI_at	100131545_TGI_at	BC012204	FNDC3B	fibronectin type III domain containing 3B	2.35e-08	1.47524	0.139435	1.12424	0.183429	0.089895	1.17735	0.184145	0	0	NA	NA	NA
X100131560_TGI_at	100131560_TGI_at	NM_199328	CLDN8	claudin 8	6.98e-07	0.644421	0.00236991	0.509774	0.00887132	0.00188298	0.486577	0.0141136	0	1	D5	D2	D1
X100131565_TGI_at	100131565_TGI_at	NM_004951	GPR183	G protein-coupled receptor 183	5.86e-07	1.64664	0.00236991	1.34606	0.00887132	0.460794	1.05691	0.597401	0	0	NA	NA	NA
X100131587_TGI_at	100131587_TGI_at	NM_000180	GUCY2D	guanylate cyclase 2D, membrane (retina-specific)	2.99e-10	1.45677	0.133335	1.13767	0.17692	0.00306378	1.62107	0.0185962	0	0	NA	NA	NA
X100131620_TGI_at	100131620_TGI_at	AK000787			3.09e-07	0.663406	0.362864	0.898503	0.409889	0.648925	1.01276	0.755322	0	0	NA	NA	NA
X100131626_TGI_at	100131626_TGI_at	ENST00000300187	MS4A14	membrane-spanning 4-domains, subfamily A, member 14	8.39e-09	1.81603	0.000626754	1.53632	0.00355639	0.00271917	2.13817	0.0172517	0	1	U1	U1	U1
X100131669_TGI_at	100131669_TGI_at	NM_030938	TMEM49	transmembrane protein 49	1.02e-06	1.46042	0.0160781	1.19356	0.0347084	0.221636	0.818594	0.351888	0	0	NA	NA	NA
X100131676_TGI_at	100131676_TGI_at	AK056140			1.44e-08	0.792318	0.383612	0.952965	0.430495	0.460794	0.954297	0.597401	0	0	NA	NA	NA
X100131685_TGI_at	100131685_TGI_at	BC029891	TFEC	transcription factor EC	2.08e-11	1.81829	0.0286637	1.2023	0.0531854	0.00146193	1.50479	0.0118985	0	0	NA	NA	NA
X100131712_TGI_at	100131712_TGI_at	BC051373	NES	nestin	6.62e-07	0.744758	0.0198072	0.824453	0.0405839	0.29165	0.883352	0.4302	0	0	NA	NA	NA
X100131732_TGI_at	100131732_TGI_at	ENST00000367629	ANGPTL1	angiopoietin-like 1	4.46e-11	0.581014	0.00404191	0.739111	0.0128919	0.144787	0.854589	0.258531	0	0	NA	NA	NA
X100131741_TGI_at	100131741_TGI_at	NM_145246	C10orf4	chromosome 10 open reading frame 4	2.97e-09	0.764988	0.285409	0.935729	0.334743	0.118794	0.880466	0.224033	0	0	NA	NA	NA
X100131748_TGI_at	100131748_TGI_at	NM_182983	HPN	hepsin (transmembrane protease, serine 1)	2.04e-11	1.44956	0.00129903	1.24027	0.00580689	1.45e-06	1.96143	0.000668695	0	1	U6	U1	U2
X100131772_TGI_at	100131772_TGI_at	NM_001042482	TPK1	thiamin pyrophosphokinase 1	1.9e-08	1.32591	0.0102178	1.13082	0.0249673	0.0064123	1.3115	0.0292731	0	1	U1	U1	U1
X100131801_TGI_at	100131801_TGI_at	NM_013252	CLEC5A	C-type lectin domain family 5, member A	9.15e-18	3.31318	9.67e-06	1.81043	0.000266398	0.136822	1.334	0.248859	0	0	NA	NA	NA
X100131820_TGI_at	100131820_TGI_at	NM_002398	MEIS1	Meis homeobox 1	2.04e-10	0.773013	0.00938818	0.90214	0.023513	0.00105544	0.793573	0.00971913	0	1	D1	D1	D1
X100131822_TGI_at	100131822_TGI_at	NM_014839		plasticity related gene 1	1.39e-07	1.53252	1.39e-05	1.57212	0.000327735	0.25501	1.2785	0.38934	0	0	NA	NA	NA
X100131829_TGI_at	100131829_TGI_at	BC032472		hypothetical LOC643733	3.71e-12	0.734204	0.0114506	0.892456	0.0269775	0.357146	0.940715	0.494451	0	0	NA	NA	NA
X100131868_TGI_at	100131868_TGI_at	AK022777	IVD	isovaleryl Coenzyme A dehydrogenase	3.92e-07	1.23127	0.324494	1.03019	0.372859	0.0414152	1.19039	0.104282	0	0	NA	NA	NA
X100131875_TGI_at	100131875_TGI_at	AL162075			2.56e-09	0.798157	0.00232563	0.877925	0.00875644	0.0965397	0.888939	0.193392	0	0	NA	NA	NA
X100131878_TGI_at	100131878_TGI_at	AK027248			3.01e-12	0.770482	0.0162271	0.914284	0.0349832	0.888166	0.968046	0.935477	0	0	NA	NA	NA
X100131890_TGI_at	100131890_TGI_at	AW969033	CYBB	cytochrome b-245, beta polypeptide	8.13e-14	2.20294	0.000138179	1.52165	0.0012652	0.000399716	2.19773	0.0056257	0	1	U4	U1	U1
X100131911_TGI_at	100131911_TGI_at	NM_012244	SLC7A8	solute carrier family 7 (cationic amino acid transporter, y+ system), member 8	6.33e-10	1.36366	0.0457988	1.11923	0.0761658	0.00930352	1.26186	0.0380041	0	0	NA	NA	NA
X100131940_TGI_at	100131940_TGI_at	NM_001042693	FAM159A	family with sequence similarity 159, member A	4.48e-07	1.2219	0.441064	1.02478	0.485336	0.660894	1.0312	0.764285	0	0	NA	NA	NA
X100131949_TGI_at	100131949_TGI_at	BC031250	KLF17	Kruppel-like factor 17	1.14e-08	0.765863	0.0169985	0.86118	0.036091	0.357146	1.06666	0.494451	0	0	NA	NA	NA
X100131959_TGI_at	100131959_TGI_at	NM_173558	FGD2	FYVE, RhoGEF and PH domain containing 2	2.71e-09	1.22889	0.541752	1.01245	0.579511	0.0454296	1.1333	0.112199	0	0	NA	NA	NA
X100131960_TGI_at	100131960_TGI_at	NM_004044	ATIC	5-aminoimidazole-4-carboxamide ribonucleotide formyltransferase/IMP cyclohydrolase	5.42e-14	1.29683	0.000819932	1.11439	0.00426921	0.0349754	1.11857	0.0937039	0	0	NA	NA	NA
X100131985_TGI_at	100131985_TGI_at	NM_000061	BTK	Bruton agammaglobulinemia tyrosine kinase	1.7e-11	1.44353	1.32e-05	1.25504	0.000318541	0.00344672	1.42202	0.0196615	0	1	U2	U1	U1
X100131991_TGI_at	100131991_TGI_at	AI867675	NFIB	nuclear factor I/B	3.07e-09	0.82933	0.00834752	0.88711	0.0217143	0.0390467	0.86694	0.101245	0	0	NA	NA	NA
X100132051_TGI_at	100132051_TGI_at	NM_016013	NDUFAF1	NADH dehydrogenase (ubiquinone) 1 alpha subcomplex, assembly factor 1	3.74e-09	1.22016	0.00246078	1.14142	0.00913719	0.0864811	1.10529	0.179492	0	0	NA	NA	NA
X100132059_TGI_at	100132059_TGI_at	NM_016240	SCARA3	scavenger receptor class A, member 3	5.93e-12	0.657083	0.0118262	0.830265	0.0275803	0.000297835	0.634148	0.0048727	0	1	D3	D1	D1
X100132099_TGI_at	100132099_TGI_at	NM_007148	RNF112	ring finger protein 112	1.15e-08	0.796334	0.00188622	0.869053	0.00766226	0.0180658	0.79393	0.0588142	0	0	NA	NA	NA
X100132114_TGI_at	100132114_TGI_at	AW873072	DSC2	desmocollin 2	9.85e-09	1.39487	0.00223935	1.25966	0.00859149	0.100265	1.2294	0.198776	0	0	NA	NA	NA
X100132116_TGI_at	100132116_TGI_at	AJ272065	RAB20	RAB20, member RAS oncogene family	2.39e-07	1.25574	0.166942	1.07791	0.21267	0.0103148	1.30444	0.0409613	0	0	NA	NA	NA
X100132157_TGI_at	100132157_TGI_at	NM_000878	IL2RB	interleukin 2 receptor, beta	1.9e-09	0.683162	0.122932	0.896448	0.165502	0.374837	1.07672	0.511473	0	0	NA	NA	NA
X100132205_TGI_at	100132205_TGI_at	NM_015147	CEP68	centrosomal protein 68kDa	2.88e-08	0.808627	0.150625	0.94654	0.195201	0.122858	0.872637	0.22915	0	0	NA	NA	NA
X100132237_TGI_at	100132237_TGI_at	NM_018843	SLC25A40	solute carrier family 25, member 40	6.31e-11	1.4714	0.000104664	1.2745	0.00106414	0.0390467	1.18233	0.101245	0	0	NA	NA	NA
X100132242_TGI_at	100132242_TGI_at	NM_005412	SHMT2	serine hydroxymethyltransferase 2 (mitochondrial)	5.45e-13	1.28379	0.190961	1.034	0.239203	0.00777706	1.15455	0.0340558	0	0	NA	NA	NA
X100132253_TGI_at	100132253_TGI_at	NM_019089	HES2	hairy and enhancer of split 2 (Drosophila)	6.5e-10	1.55442	0.0027128	1.25798	0.00973649	0.215748	1.13798	0.344577	0	0	NA	NA	NA
X100132265_TGI_at	100132265_TGI_at	NM_001511	CXCL1	chemokine (C-X-C motif) ligand 1 (melanoma growth stimulating activity, alpha)	3.37e-07	2.26139	0.00313343	1.61138	0.0108475	0.234598	1.26777	0.367043	0	0	NA	NA	NA
X100132318_TGI_at	100132318_TGI_at	NM_002087	GRN	granulin	4.9e-10	1.39179	0.00532634	1.16612	0.0157494	0.00160065	1.4226	0.0126134	0	1	U2	U1	U1
X100132328_TGI_at	100132328_TGI_at	AL514294	SENP3	SUMO1/sentrin/SMT3 specific peptidase 3	6.62e-08	1.26752	0.0733153	1.09662	0.110339	0.0399015	1.157	0.101662	0	0	NA	NA	NA
X100132353_TGI_at	100132353_TGI_at	AK024722	CLIP4	CAP-GLY domain containing linker protein family, member 4	7.06e-16	1.71224	4.37e-06	1.34296	0.000158381	0.000320802	1.40156	0.00511854	0	1	U8	U3	U1
X100132362_TGI_at	100132362_TGI_at	NM_016027	LACTB2	lactamase, beta 2	2.65e-07	1.39824	0.067036	1.15951	0.103377	0.154337	1.24857	0.270635	0	0	NA	NA	NA
X100132368_TGI_at	100132368_TGI_at	NM_015252	EHBP1	EH domain binding protein 1	8.49e-11	0.824304	0.482889	0.974666	0.524201	0.203149	0.926671	0.330515	0	0	NA	NA	NA
X100132379_TGI_at	100132379_TGI_at	ENST00000369303	EPHA7	EPH receptor A7	2.25e-08	0.605772	0.168692	0.867187	0.214475	9.98e-05	0.517877	0.00318384	0	0	NA	NA	NA
X100132386_TGI_at	100132386_TGI_at	NM_002941	ROBO1	roundabout, axon guidance receptor, homolog 1 (Drosophila)	1.32e-08	0.812704	0.00907964	0.913336	0.0230544	0.000803319	0.850202	0.00825695	0	1	D2	D1	D1
X100132388_TGI_at	100132388_TGI_at	BC015818	LGALS8	lectin, galactoside-binding, soluble, 8	3.67e-09	1.22438	0.0141124	1.08852	0.0314119	0.784831	0.981127	0.86155	0	0	NA	NA	NA
X100132406_TGI_at	100132406_TGI_at	NM_024015	HOXB4	homeobox B4	7.48e-07	0.782124	0.00111084	0.834122	0.00521139	3.92e-05	0.744738	0.00188401	0	1	D1	D1	D1
X100132426_TGI_at	100132426_TGI_at	AF468213	LGALS8	lectin, galactoside-binding, soluble, 8	3.52e-11	1.28108	0.0238435	1.07871	0.0465179	0.357146	1.0321	0.494451	0	0	NA	NA	NA
X100132434_TGI_at	100132434_TGI_at	NM_006291	TNFAIP2	tumor necrosis factor, alpha-induced protein 2	2.3e-10	1.31388	0.00567345	1.14515	0.0163849	0.00607161	1.25531	0.0281566	0	1	U2	U1	U1
X100132468_TGI_at	100132468_TGI_at	BC007029	PCYOX1	prenylcysteine oxidase 1	3.92e-07	0.798689	0.852323	1.02046	0.866027	0.016931	1.40977	0.0564309	0	0	NA	NA	NA
X100132477_TGI_at	100132477_TGI_at	NM_007249	KLF12	Kruppel-like factor 12	9.86e-07	0.822772	0.0613091	0.92805	0.0960874	0.0349754	0.803773	0.0937039	0	0	NA	NA	NA
X100132509_TGI_at	100132509_TGI_at	NM_030915	LBH	limb bud and heart development homolog (mouse)	3.55e-08	0.813186	0.640628	0.981193	0.673433	0.276599	0.926572	0.413487	0	0	NA	NA	NA
X100132511_TGI_at	100132511_TGI_at	AW853954	EML4	echinoderm microtubule associated protein like 4	6.79e-07	1.24461	0.0325982	1.09219	0.0584337	0.0365013	1.16864	0.0964394	0	0	NA	NA	NA
X100132530_TGI_at	100132530_TGI_at	NM_000540	RYR1	ryanodine receptor 1 (skeletal)	2.15e-11	1.67129	0.000101761	1.34156	0.00106306	0.0806094	1.26601	0.170587	0	0	NA	NA	NA
X100132561_TGI_at	100132561_TGI_at	NM_024307	GDPD3	glycerophosphodiester phosphodiesterase domain containing 3	8.98e-09	0.682296	0.0244161	0.85122	0.047377	0.484848	0.877866	0.621585	0	0	NA	NA	NA
X100132603_TGI_at	100132603_TGI_at	ENST00000373304	CYSLTR1	cysteinyl leukotriene receptor 1	6.33e-08	1.33562	0.00103809	1.15274	0.00494137	0.200147	1.2136	0.328951	0	0	NA	NA	NA
X100132619_TGI_at	100132619_TGI_at	ENST00000379035	CDC42EP3	CDC42 effector protein (Rho GTPase binding) 3	6.14e-07	1.24306	0.00223935	1.12027	0.00859149	0.89725	1.00656	0.944438	0	0	NA	NA	NA
X100132634_TGI_at	100132634_TGI_at	NM_001795	CDH5	cadherin 5, type 2 (vascular endothelium)	1.02e-12	0.738254	0.132694	0.917548	0.17636	0.967011	1.04109	0.980395	0	0	NA	NA	NA
X100132672_TGI_at	100132672_TGI_at	NM_138463	TLCD1	TLC domain containing 1	3.22e-12	1.57474	0.445299	1.01357	0.488662	0.0132706	1.37571	0.0481115	0	0	NA	NA	NA
X100132699_TGI_at	100132699_TGI_at	NM_000107	DDB2	damage-specific DNA binding protein 2, 48kDa	3.71e-10	1.42177	5.13e-05	1.22633	0.000697125	0.284058	1.10348	0.421122	0	0	NA	NA	NA
X100132703_TGI_at	100132703_TGI_at	AF131837	ST6GALNAC5	ST6 (alpha-N-acetyl-neuraminyl-2,3-beta-galactosyl-1,3)-N-acetylgalactosaminide alpha-2,6-sialyltransferase 5	3.01e-12	0.625689	0.0525158	0.819129	0.0848204	0.267058	1.28651	0.403399	0	0	NA	NA	NA
X100132705_TGI_at	100132705_TGI_at	NM_153029	N4BP1	NEDD4 binding protein 1	1.27e-06	0.817825	0.0138733	0.833364	0.0310006	0.197238	1.15773	0.324668	0	0	NA	NA	NA
X100132722_TGI_at	100132722_TGI_at	NM_030965	ST6GALNAC5	ST6 (alpha-N-acetyl-neuraminyl-2,3-beta-galactosyl-1,3)-N-acetylgalactosaminide alpha-2,6-sialyltransferase 5	2.86e-11	0.674064	0.0859833	0.827554	0.125169	0.39299	1.26509	0.532043	0	0	NA	NA	NA
X100132759_TGI_at	100132759_TGI_at	ENST00000260058	CREBZF	CREB/ATF bZIP transcription factor	2.65e-08	0.798607	0.414374	0.99808	0.459734	0.0043422	0.82795	0.0228675	0	0	NA	NA	NA
X100132760_TGI_at	100132760_TGI_at	AL133627			4.33e-08	0.744586	0.597911	0.963119	0.63224	0.215347	0.853218	0.344449	0	0	NA	NA	NA
X100132785_TGI_at	100132785_TGI_at	NM_001375	DNASE2	deoxyribonuclease II, lysosomal	6.07e-10	1.27577	0.204592	1.09004	0.253616	0.0380823	1.23957	0.0995452	0	0	NA	NA	NA
X100132821_TGI_at	100132821_TGI_at	NM_015697	COQ2	coenzyme Q2 homolog, prenyltransferase (yeast)	1.1e-10	1.35335	0.000926576	1.14262	0.0046372	0.0103452	1.19228	0.0409613	0	1	U2	U1	U1
X100132826_TGI_at	100132826_TGI_at	AU121404	LMCD1	LIM and cysteine-rich domains 1	4.35e-09	0.673518	0.139251	0.870689	0.183335	0.780652	1.06619	0.859891	0	0	NA	NA	NA
X100132841_TGI_at	100132841_TGI_at	NM_015589	SAMD4A	sterile alpha motif domain containing 4A	2.33e-07	1.37347	0.724093	1.02633	0.748478	0.00979779	1.24905	0.039468	0	0	NA	NA	NA
X100132869_TGI_at	100132869_TGI_at	AL136909	CLPB	ClpB caseinolytic peptidase B homolog (E. coli)	1.37e-09	1.43403	0.0535709	1.06412	0.0860713	0.0668422	1.14518	0.148369	0	0	NA	NA	NA
X100132896_TGI_at	100132896_TGI_at	NM_001024594	C1orf53	chromosome 1 open reading frame 53	3.05e-11	1.5002	0.000283668	1.259	0.00204533	0.00325024	1.33266	0.0191159	0	1	U3	U1	U1
X100132898_TGI_at	100132898_TGI_at	NM_002456	MUC1	mucin 1, cell surface associated	3.95e-12	1.24279	0.0280465	1.07642	0.0523516	0.000461729	1.37766	0.0060494	0	0	NA	NA	NA
X100132927_TGI_at	100132927_TGI_at	NM_016086	STYXL1	serine/threonine/tyrosine interacting-like 1	1.87e-07	1.20271	0.568384	0.996207	0.604388	0.797585	0.958661	0.871691	0	0	NA	NA	NA
X100132932_TGI_at	100132932_TGI_at	NM_018040	GPATCH2	G patch domain containing 2	1.02e-07	1.2317	0.000277495	1.20495	0.00201858	0.32334	0.950102	0.462756	0	0	NA	NA	NA
X100132938_TGI_at	100132938_TGI_at	NM_001085347	TOR2A	torsin family 2, member A	8.72e-08	1.24587	0.997715	0.989652	0.997736	0.0390467	1.16214	0.101245	0	0	NA	NA	NA
X100132946_TGI_at	100132946_TGI_at	NM_003608	GPR65	G protein-coupled receptor 65	2.79e-10	1.36479	0.00466259	1.19437	0.0143392	0.0043422	1.43676	0.0228675	0	1	U7	U2	U1
X100132988_TGI_at	100132988_TGI_at	NM_004227	CYTH3	cytohesin 3	4.1e-09	0.809901	0.0680281	0.951222	0.104457	0.221636	0.920653	0.351888	0	0	NA	NA	NA
X100132994_TGI_at	100132994_TGI_at	NM_030984	TBXAS1	thromboxane A synthase 1 (platelet)	1.74e-13	1.50616	0.0150656	1.13902	0.0329867	0.000988854	1.47021	0.00935714	0	1	U6	U1	U1
X100133022_TGI_at	100133022_TGI_at	NM_022126		phospholysine phosphohistidine inorganic pyrophosphate phosphatase	1.17e-06	1.24149	0.271641	1.0467	0.320813	0.00543765	1.23373	0.0261966	0	0	NA	NA	NA
X100133026_TGI_at	100133026_TGI_at	BC041480		hypothetical protein LOC286189	2.99e-11	1.70143	0.000120247	1.47217	0.00117442	0.0163491	1.41529	0.0552339	0	0	NA	NA	NA
X100133071_TGI_at	100133071_TGI_at	ENST00000344427			2.34e-09	1.42744	4.77e-05	1.28417	0.000659239	0.00125244	1.42219	0.0108804	0	1	U1	U2	U1
X100133086_TGI_at	100133086_TGI_at	NM_016209	TRAPPC2L	trafficking protein particle complex 2-like	3.65e-09	1.24046	0.0743865	1.06629	0.111407	0.00208139	1.22986	0.0149688	0	0	NA	NA	NA
X100133091_TGI_at	100133091_TGI_at	NM_001040033	CD53	CD53 molecule	2.08e-09	1.2693	0.014776	1.09369	0.0326185	0.00413197	1.22587	0.0221218	0	1	U2	U1	U1
X100133097_TGI_at	100133097_TGI_at	NM_014373	GPR160	G protein-coupled receptor 160	2.78e-13	1.71545	0.000217614	1.26768	0.00172912	0.00298893	1.465	0.0184193	0	1	U3	U1	U1
X100133099_TGI_at	100133099_TGI_at	NM_001083910	SIRPB1	signal-regulatory protein beta 1	8.27e-08	1.52075	0.00780035	1.23006	0.0206918	0.0713284	1.28024	0.157137	0	0	NA	NA	NA
X100133101_TGI_at	100133101_TGI_at	ENST00000274335	PIK3R1	phosphoinositide-3-kinase, regulatory subunit 1 (alpha)	3.8e-07	0.758375	0.0852105	0.891282	0.124325	0.492644	0.934819	0.62858	0	0	NA	NA	NA
X100133124_TGI_at	100133124_TGI_at	DQ891643	CDS2	CDP-diacylglycerol synthase (phosphatidate cytidylyltransferase) 2	4.7e-08	1.25107	0.00776715	1.15271	0.0206547	0.00486276	1.23607	0.0243743	0	1	U1	U1	U1
X100133130_TGI_at	100133130_TGI_at	BE219210	TUSC3	tumor suppressor candidate 3	1.02e-07	0.778839	0.00149057	0.838182	0.00650083	0.0502336	0.795623	0.12164	0	0	NA	NA	NA
X100133134_TGI_at	100133134_TGI_at	NM_016267	VGLL1	vestigial like 1 (Drosophila)	8.5e-07	0.75923	0.00546305	0.851617	0.0160067	0.484848	1.07254	0.621585	0	0	NA	NA	NA
X100133144_TGI_at	100133144_TGI_at	NM_000316	PTHR1	parathyroid hormone receptor 1	5.84e-07	0.734492	1.99e-05	0.730276	0.000387055	0.228053	0.847756	0.35942	0	0	NA	NA	NA
X100133158_TGI_at	100133158_TGI_at	NM_001079692	MS4A14	membrane-spanning 4-domains, subfamily A, member 14	7.07e-10	1.66511	0.000419333	1.46305	0.00269225	0.00410091	1.69155	0.0220655	0	1	U1	U1	U1
X100133199_TGI_at	100133199_TGI_at	CK429529	SLC5A8	solute carrier family 5 (iodide transporter), member 8	8.27e-08	2.37564	0.00638554	1.9693	0.0178496	0.10722	1.4272	0.208175	0	0	NA	NA	NA
X100133215_TGI_at	100133215_TGI_at	NM_004795	KL	klotho	1.8e-08	0.620983	0.000507959	0.741152	0.00306583	0.836152	1.03969	0.898606	0	0	NA	NA	NA
X100133230_TGI_at	100133230_TGI_at	T92996			1.11e-07	1.32795	0.0753216	1.13432	0.11239	0.450742	1.11958	0.587204	0	0	NA	NA	NA
X100133255_TGI_at	100133255_TGI_at	NM_002421	MMP1	matrix metallopeptidase 1 (interstitial collagenase)	1.05e-15	7.55459	5.63e-07	3.85717	4.7e-05	0.529136	1.17903	0.660834	0	0	NA	NA	NA
X100133262_TGI_at	100133262_TGI_at	NM_015595		Src homology 3 domain-containing guanine nucleotide exchange factor	3.57e-08	0.773985	0.0484673	0.827679	0.0796178	0.257214	1.27312	0.391963	0	0	NA	NA	NA
X100133273_TGI_at	100133273_TGI_at	NM_213649	SFXN4	sideroflexin 4	8.93e-07	1.2459	0.818188	0.992101	0.834236	0.806688	0.989374	0.879552	0	0	NA	NA	NA
X100133288_TGI_at	100133288_TGI_at	NM_022054	KCNK13	potassium channel, subfamily K, member 13	2.71e-09	1.50897	0.0421054	1.18578	0.0711619	0.545438	1.09038	0.674087	0	0	NA	NA	NA
X100133298_TGI_at	100133298_TGI_at	NM_002468	MYD88	myeloid differentiation primary response gene (88)	4.61e-10	1.2924	0.00098459	1.16007	0.00475762	0.0253382	1.18709	0.0748535	0	0	NA	NA	NA
X100133326_TGI_at	100133326_TGI_at	NM_006100	ST3GAL6	ST3 beta-galactoside alpha-2,3-sialyltransferase 6	5.95e-09	1.30511	0.0312381	1.08347	0.0566576	0.13782	1.16851	0.249969	0	0	NA	NA	NA
X100133335_TGI_at	100133335_TGI_at	NM_000185	SERPIND1	serpin peptidase inhibitor, clade D (heparin cofactor), member 1	5.2e-17	13.2569	9.6e-10	5.64788	3.44e-07	1.82e-06	5.66027	0.000730441	1	1	U8	U3	U3
X100133344_TGI_at	100133344_TGI_at	NM_031442	TMEM47	transmembrane protein 47	2.08e-11	0.701278	0.00426529	0.863291	0.0134248	0.140182	0.867708	0.252829	0	0	NA	NA	NA
X100133355_TGI_at	100133355_TGI_at	NM_007274	ACOT7	acyl-CoA thioesterase 7	3.58e-08	1.41172	0.0224567	1.16065	0.0446227	0.0179719	1.21348	0.0588056	0	0	NA	NA	NA
X100133375_TGI_at	100133375_TGI_at	NM_007199	IRAK3	interleukin-1 receptor-associated kinase 3	3.9e-07	1.42438	0.199204	1.12191	0.247889	0.784831	1.00884	0.86155	0	0	NA	NA	NA
X100133379_TGI_at	100133379_TGI_at	ENST00000330692	ZNF829	zinc finger protein 829	5.28e-07	0.821484	0.359317	0.951924	0.406629	0.829573	1.01758	0.894817	0	0	NA	NA	NA
X100133427_TGI_at	100133427_TGI_at	ENST00000357783	PHTF1	putative homeodomain transcription factor 1	3.39e-08	1.3483	0.733248	1.01373	0.75697	0.567747	1.00676	0.691814	0	0	NA	NA	NA
X100133460_TGI_at	100133460_TGI_at	BC108284	TRMT5	TRM5 tRNA methyltransferase 5 homolog (S. cerevisiae)	3.12e-07	1.20708	0.265798	1.03807	0.315067	0.284058	1.05471	0.421122	0	0	NA	NA	NA
X100133547_TGI_at	100133547_TGI_at	NM_022082	C20orf59	chromosome 20 open reading frame 59	1.7e-10	1.53727	0.00152244	1.24605	0.00657661	0.196883	1.16625	0.324668	0	0	NA	NA	NA
X100133551_TGI_at	100133551_TGI_at	AF033095	TMBIM6	transmembrane BAX inhibitor motif containing 6	7.19e-15	1.25672	0.00211542	1.16681	0.00829913	0.00410091	1.18416	0.0220655	0	1	U1	U1	U1
X100133559_TGI_at	100133559_TGI_at	AK128040	TMEM136	transmembrane protein 136	5.09e-13	0.743425	0.0145916	0.896041	0.0322999	0.0214252	0.815056	0.0663975	0	0	NA	NA	NA
X100133588_TGI_at	100133588_TGI_at	ENST00000374465	PARD3B	par-3 partitioning defective 3 homolog B (C. elegans)	8.88e-12	0.755653	0.0330145	0.896257	0.0588734	0.421328	0.95604	0.560905	0	0	NA	NA	NA
X100133649_TGI_at	100133649_TGI_at	NM_000685	AGTR1	angiotensin II receptor, type 1	1.17e-07	0.753805	0.0655472	0.896142	0.101372	0.637044	0.98841	0.747431	0	0	NA	NA	NA
X100133673_TGI_at	100133673_TGI_at	NM_181745	GPR120	G protein-coupled receptor 120	1.24e-12	1.75642	0.00155383	1.45604	0.00664398	0.000826708	1.59874	0.0084319	0	1	U2	U1	U1
X100133675_TGI_at	100133675_TGI_at	NM_172069	PLEKHH2	pleckstrin homology domain containing, family H (with MyTH4 domain) member 2	2.3e-14	0.672383	0.27279	0.937236	0.321816	0.0380823	0.826907	0.0995452	0	0	NA	NA	NA
X100133715_TGI_at	100133715_TGI_at	NM_002225	IVD	isovaleryl Coenzyme A dehydrogenase	3.78e-08	1.28563	0.827021	1.00243	0.842442	0.000149203	1.36764	0.00384705	0	0	NA	NA	NA
X100133718_TGI_at	100133718_TGI_at	AA772087	SGPP2	sphingosine-1-phosphate phosphotase 2	2.58e-07	1.53257	0.24176	1.09893	0.290202	0.00137087	1.76806	0.0113874	0	0	NA	NA	NA
X100133720_TGI_at	100133720_TGI_at	NM_030806	C1orf21	chromosome 1 open reading frame 21	6.35e-09	0.783909	0.0688894	0.945326	0.105478	0.0186209	1.22823	0.0602562	0	0	NA	NA	NA
X100133738_TGI_at	100133738_TGI_at	NM_001645	APOC1	apolipoprotein C-I	6.34e-12	1.35927	0.0365312	1.09684	0.063885	7.39e-05	1.45429	0.00264762	0	0	NA	NA	NA
X100133742_TGI_at	100133742_TGI_at	NM_004946	DOCK2	dedicator of cytokinesis 2	1.08e-07	1.30629	0.00941102	1.15305	0.023513	7.94e-06	1.42961	0.00117095	0	1	U4	U1	U1
X100133783_TGI_at	100133783_TGI_at	NM_024786	ZDHHC11	zinc finger, DHHC-type containing 11	1.27e-06	0.621447	0.00256371	0.71107	0.00937891	0.209185	1.22954	0.337324	0	0	NA	NA	NA
X100133793_TGI_at	100133793_TGI_at	NM_198393	TEX14	testis expressed 14	1.02e-11	1.86704	1.05e-05	1.56816	0.000281013	0.00134003	1.64265	0.0113874	0	1	U2	U2	U1
X100133799_TGI_at	100133799_TGI_at	NM_000101	CYBA	cytochrome b-245, alpha polypeptide	6.86e-10	1.47236	0.0101835	1.14713	0.0249673	0.00465476	1.46785	0.0239271	0	1	U1	U1	U1
X100133844_TGI_at	100133844_TGI_at	CR457348	TMEM53	transmembrane protein 53	4.34e-10	1.46107	0.135092	1.0779	0.178736	0.000574164	1.46309	0.0068793	0	0	NA	NA	NA
X100133867_TGI_at	100133867_TGI_at	AK025495	SASH1	SAM and SH3 domain containing 1	1.24e-07	0.800804	0.000114452	0.81171	0.00112807	0.10722	1.15609	0.208175	0	0	NA	NA	NA
X100133883_TGI_at	100133883_TGI_at	BC051306	CCR1	chemokine (C-C motif) receptor 1	8.48e-10	1.56306	0.00846966	1.22882	0.0219774	0.0108553	1.56278	0.0419049	0	1	U2	U1	U1
X100133900_TGI_at	100133900_TGI_at	NM_004484	GPC3	glypican 3	1.4e-14	0.645349	7.84e-05	0.760753	0.000892421	0.0864811	0.883944	0.179492	0	0	NA	NA	NA
X100133912_TGI_at	100133912_TGI_at	AW072050	MYO9B	myosin IXB	1.08e-08	1.3973	0.00410298	1.1319	0.0130542	0.0658972	1.20151	0.147696	0	0	NA	NA	NA
X100133917_TGI_at	100133917_TGI_at	NM_001004303	C1orf168	chromosome 1 open reading frame 168	6.51e-08	0.589164	0.0927382	0.758026	0.132783	0.0488071	0.628506	0.118721	0	0	NA	NA	NA
X100133958_TGI_at	100133958_TGI_at	NM_018840	C20orf24	chromosome 20 open reading frame 24	4.54e-11	1.27167	0.288797	1.03427	0.337856	0.161066	1.08926	0.279095	0	0	NA	NA	NA
X100133964_TGI_at	100133964_TGI_at	CR933682	PEG3	paternally expressed 3	8.3e-10	0.710139	0.00102512	0.818507	0.00489474	0.0224365	0.734551	0.0684132	0	0	NA	NA	NA
X100133983_TGI_at	100133983_TGI_at	NM_053279	FAM167A	family with sequence similarity 167, member A	2.29e-11	0.578333	0.0799402	0.825695	0.117862	0.0335032	1.41308	0.0910461	0	0	NA	NA	NA
X100133985_TGI_at	100133985_TGI_at	NM_001333	CTSL2	cathepsin L2	9.96e-08	0.641532	0.546675	0.921249	0.584195	0.0449861	0.722602	0.111445	0	0	NA	NA	NA
X100133997_TGI_at	100133997_TGI_at	NM_153236	GIMAP7	GTPase, IMAP family member 7	7.56e-10	0.711583	0.0150656	0.880452	0.0329867	0.810392	0.989585	0.881205	0	0	NA	NA	NA
X100134020_TGI_at	100134020_TGI_at	ENST00000296858	ATXN1	ataxin 1	2.09e-08	1.23303	0.00466259	1.10309	0.0143392	0.0224365	1.13974	0.0684132	0	0	NA	NA	NA
X100134027_TGI_at	100134027_TGI_at	NM_001138	AGRP	agouti related protein homolog (mouse)	9.19e-10	1.4799	0.0681031	1.17054	0.104472	0.00372066	1.39576	0.0207592	0	0	NA	NA	NA
X100134049_TGI_at	100134049_TGI_at	AK124702			9.69e-07	0.809906	0.392977	0.924627	0.439169	0.0595355	0.793676	0.137946	0	0	NA	NA	NA
X100134055_TGI_at	100134055_TGI_at	NM_000784	CYP27A1	cytochrome P450, family 27, subfamily A, polypeptide 1	1.27e-16	1.77579	9.26e-05	1.29926	0.00101489	9.68e-06	1.65646	0.00124826	0	1	U4	U2	U1
X100134072_TGI_at	100134072_TGI_at	NM_001428	ENO1	enolase 1, (alpha)	6.48e-07	1.27736	0.306581	1.03271	0.355563	0.00387157	1.25741	0.0213588	0	0	NA	NA	NA
X100134077_TGI_at	100134077_TGI_at	NM_002094	GSPT1	G1 to S phase transition 1	2.56e-09	1.25025	0.0224567	1.09047	0.0446227	0.0161366	1.14907	0.0547454	0	0	NA	NA	NA
X100134109_TGI_at	100134109_TGI_at	DQ893643	PDE1C	phosphodiesterase 1C, calmodulin-dependent 70kDa	6.64e-07	0.780866	0.0310415	0.869813	0.056428	0.613557	1.03641	0.72702	0	0	NA	NA	NA
X100134122_TGI_at	100134122_TGI_at	NM_078483	SLC36A1	solute carrier family 36 (proton/amino acid symporter), member 1	1.81e-08	1.42232	0.0239846	1.13007	0.0467648	0.190865	1.11873	0.318231	0	0	NA	NA	NA
X100134141_TGI_at	100134141_TGI_at	NM_018413	CHST11	carbohydrate (chondroitin 4) sulfotransferase 11	1.13e-10	1.45452	0.0112583	1.12152	0.0266809	0.0931708	1.12327	0.188857	0	0	NA	NA	NA
X100134144_TGI_at	100134144_TGI_at	CA429631	STK32A	serine/threonine kinase 32A	2.52e-07	1.37744	0.662514	1.0173	0.692823	0.698316	0.934321	0.796135	0	0	NA	NA	NA
X100134151_TGI_at	100134151_TGI_at	ENST00000372725	MYST4	MYST histone acetyltransferase (monocytic leukemia) 4	5.04e-12	0.814197	0.856817	0.993576	0.86977	0.383878	0.956225	0.520942	0	0	NA	NA	NA
X100134167_TGI_at	100134167_TGI_at	ENST00000312785	PLAC2	placenta-specific 2 (non-protein coding)	1.79e-07	0.669998	0.0938559	0.856898	0.133848	0.54546	1.12287	0.674087	0	0	NA	NA	NA
X100134188_TGI_at	100134188_TGI_at	ENST00000369697	KCND3	potassium voltage-gated channel, Shal-related subfamily, member 3	1.56e-08	1.40868	0.00741515	1.21758	0.0199325	0.534478	1.05559	0.664336	0	0	NA	NA	NA
X100134205_TGI_at	100134205_TGI_at	NM_021804	ACE2	angiotensin I converting enzyme (peptidyl-dipeptidase A) 2	2.37e-08	1.42216	0.153435	1.11518	0.198284	0.0268967	1.15618	0.0781678	0	0	NA	NA	NA
X100134212_TGI_at	100134212_TGI_at	NM_000034	ALDOA	aldolase A, fructose-bisphosphate	7.07e-10	1.21267	0.0103863	1.07284	0.0252452	0.0177588	1.18427	0.0584046	0	0	NA	NA	NA
X100134219_TGI_at	100134219_TGI_at	NM_032901	C12orf62	chromosome 12 open reading frame 62	7.7e-11	1.20083	0.0453788	1.04638	0.0755844	0.000185312	1.21288	0.00402842	0	0	NA	NA	NA
X100134239_TGI_at	100134239_TGI_at	NM_130847	AMOTL1	angiomotin like 1	5.54e-12	0.818087	0.0068388	0.902531	0.0188227	0.25501	1.04593	0.38934	0	0	NA	NA	NA
X100134259_TGI_at	100134259_TGI_at	BC018435		damage-regulated autophagy modulator	1.99e-07	1.29711	0.0230129	1.12424	0.0453642	0.000173465	1.58185	0.00402842	0	1	U4	U1	U1
X100134262_TGI_at	100134262_TGI_at	AK074637	PTGFRN	prostaglandin F2 receptor negative regulator	7.51e-12	1.53825	0.00641817	1.20475	0.0179253	0.269271	1.16418	0.405164	0	0	NA	NA	NA
X100134288_TGI_at	100134288_TGI_at	NM_001091	ABP1	amiloride binding protein 1 (amine oxidase (copper-containing))	2.26e-10	1.45817	0.000669041	1.23558	0.00371139	0.0420548	1.19222	0.10581	0	0	NA	NA	NA
X100134303_TGI_at	100134303_TGI_at	BC090942			2.21e-10	1.42715	0.000355184	1.19477	0.00237996	0.0301691	1.24179	0.0855943	0	0	NA	NA	NA
X100134334_TGI_at	100134334_TGI_at	NM_145064	STAC3	SH3 and cysteine rich domain 3	2.2e-09	1.43379	0.0492156	1.11245	0.0805187	0.0049374	1.36771	0.0246335	0	0	NA	NA	NA
X100134346_TGI_at	100134346_TGI_at	NM_001005473	PLCXD3	phosphatidylinositol-specific phospholipase C, X domain containing 3	2.21e-14	0.449971	1.3e-06	0.646438	7.52e-05	0.023488	0.703303	0.0704859	0	0	NA	NA	NA
X100134356_TGI_at	100134356_TGI_at	BQ446588			7.25e-08	0.825607	0.703275	0.983161	0.730473	0.0691022	1.10799	0.153169	0	0	NA	NA	NA
X100134381_TGI_at	100134381_TGI_at	AK074775	LONP2	lon peptidase 2, peroxisomal	2.71e-12	1.32123	7.92e-05	1.13859	0.000898638	0.019787	1.13262	0.0627692	0	0	NA	NA	NA
X100134409_TGI_at	100134409_TGI_at	NM_033105	DNAJC5B	DnaJ (Hsp40) homolog, subfamily C, member 5 beta	2.32e-14	2.82062	2.17e-06	2.02029	0.000101523	4.67e-05	2.02755	0.00206056	0	1	U6	U3	U1
X100134410_TGI_at	100134410_TGI_at	AF227905	UGCGL1	UDP-glucose ceramide glucosyltransferase-like 1	4.26e-13	1.32246	0.00938818	1.1029	0.023513	0.331594	1.06485	0.472261	0	0	NA	NA	NA
X100134442_TGI_at	100134442_TGI_at	AK095500			1.33e-10	1.78244	0.00142959	1.45087	0.00630311	0.563623	0.926839	0.691231	0	0	NA	NA	NA
X100134457_TGI_at	100134457_TGI_at	NM_152414	BHLHB5	basic helix-loop-helix domain containing, class B, 5	5.79e-07	1.64135	0.0127356	1.27823	0.0292774	0.411774	0.800764	0.552978	0	0	NA	NA	NA
X100134477_TGI_at	100134477_TGI_at	AF237916	MS4A7	membrane-spanning 4-domains, subfamily A, member 7	2.48e-11	1.71387	0.000185772	1.33632	0.0015483	5.16e-05	1.83575	0.00207993	0	1	U2	U2	U1
X100134493_TGI_at	100134493_TGI_at	NM_018648	NOP10	NOP10 ribonucleoprotein homolog (yeast)	3.07e-10	1.25754	0.00145871	1.1068	0.00639651	3.09e-05	1.27033	0.0018051	0	1	U1	U1	U1
X100134508_TGI_at	100134508_TGI_at	NM_000404	GLB1	galactosidase, beta 1	1.67e-10	1.27658	0.000570407	1.14728	0.00333048	8.46e-05	1.3425	0.00284068	0	1	U2	U1	U1
X100134529_TGI_at	100134529_TGI_at	ENST00000373965	PCDH15	protocadherin 15	1.06e-09	0.651277	0.0724245	0.864626	0.109486	0.299374	0.888116	0.437986	0	0	NA	NA	NA
X100134532_TGI_at	100134532_TGI_at	AI762077		hypothetical protein LOC283875	7.23e-08	1.30529	0.152507	1.09368	0.197243	0.10722	1.12612	0.208175	0	0	NA	NA	NA
X100134592_TGI_at	100134592_TGI_at	DQ891713	CDH13	cadherin 13, H-cadherin (heart)	2.47e-10	0.630568	0.0715271	0.871291	0.108588	0.174828	0.828895	0.29829	0	0	NA	NA	NA
X100134611_TGI_at	100134611_TGI_at	CR936651	SIPA1L1	signal-induced proliferation-associated 1 like 1	1.07e-09	0.813006	0.0430238	0.920841	0.0722594	0.88364	1.00613	0.933455	0	0	NA	NA	NA
X100134624_TGI_at	100134624_TGI_at	NM_016615	SLC6A13	solute carrier family 6 (neurotransmitter transporter, GABA), member 13	1.34e-07	1.2791	0.123311	1.07982	0.165873	0.00410091	1.30889	0.0220655	0	0	NA	NA	NA
X100134628_TGI_at	100134628_TGI_at	NM_002381	MATN3	matrilin 3	4.05e-11	0.553881	0.232169	0.855298	0.281098	0.697304	0.94585	0.795826	0	0	NA	NA	NA
X100134631_TGI_at	100134631_TGI_at	AI681842	RBM9	RNA binding motif protein 9	1.36e-08	0.831376	0.835875	0.993211	0.850422	0.849099	0.954935	0.906475	0	0	NA	NA	NA
X100134643_TGI_at	100134643_TGI_at	NM_001045	SLC6A4	solute carrier family 6 (neurotransmitter transporter, serotonin), member 4	1.59e-09	0.425937	0.00216884	0.627173	0.00843686	0.829573	0.985466	0.894817	0	0	NA	NA	NA
X100134671_TGI_at	100134671_TGI_at	NM_007256	SLCO2B1	solute carrier organic anion transporter family, member 2B1	5.02e-09	1.25548	0.00127124	1.16883	0.00570642	0.0930364	1.20497	0.188857	0	0	NA	NA	NA
X100134706_TGI_at	100134706_TGI_at	NM_005771	DHRS9	dehydrogenase/reductase (SDR family) member 9	3.38e-08	1.69944	0.441839	1.12646	0.485691	0.862086	0.92394	0.916393	0	0	NA	NA	NA
X100134746_TGI_at	100134746_TGI_at	NM_001001555	GRB10	growth factor receptor-bound protein 10	2.05e-07	0.796966	0.000669041	0.844854	0.00371139	0.567747	1.04346	0.691814	0	0	NA	NA	NA
X100134766_TGI_at	100134766_TGI_at	BC038440	GALNT1	UDP-N-acetyl-alpha-D-galactosamine:polypeptide N-acetylgalactosaminyltransferase 1 (GalNAc-T1)	9.22e-07	1.23585	0.133322	1.04259	0.17692	0.215748	1.16199	0.344577	0	0	NA	NA	NA
X100134770_TGI_at	100134770_TGI_at	BC073171	SNX5	sorting nexin 5	2.44e-08	1.60646	0.0742469	1.16928	0.111407	0.784831	0.984548	0.86155	0	0	NA	NA	NA
X100134827_TGI_at	100134827_TGI_at	NM_001037738	NPM1	nucleophosmin (nucleolar phosphoprotein B23, numatrin)	9.67e-16	1.33824	0.000121772	1.14023	0.00118571	0.0867106	1.09287	0.179492	0	0	NA	NA	NA
X100134851_TGI_at	100134851_TGI_at	NM_015488	PNKD	paroxysmal nonkinesigenic dyskinesia	1.99e-12	1.44793	0.0270507	1.14974	0.0509552	0.00106453	1.36931	0.0097471	0	0	NA	NA	NA
X100134858_TGI_at	100134858_TGI_at	BC037549	GK	glycerol kinase	5.66e-13	1.99137	0.00540378	1.27427	0.0159054	0.00710133	1.34252	0.0318925	0	1	U2	U1	U1
X100134936_TGI_at	100134936_TGI_at	NM_198488	FAM83H	family with sequence similarity 83, member H	8.95e-08	1.20349	0.230333	1.04638	0.279294	0.00188298	1.31492	0.0141136	0	0	NA	NA	NA
X100134997_TGI_at	100134997_TGI_at	AA129758	EIF4E3	eukaryotic translation initiation factor 4E family member 3	1.72e-10	0.7914	0.000162156	0.849358	0.0013974	0.421328	0.968147	0.560905	0	0	NA	NA	NA
X100135002_TGI_at	100135002_TGI_at	NM_031950	FGFBP2	fibroblast growth factor binding protein 2	2.2e-09	0.537016	0.0195092	0.694684	0.0401264	0.289772	0.865055	0.428608	0	0	NA	NA	NA
X100135009_TGI_at	100135009_TGI_at	BC064492	UBE2I	ubiquitin-conjugating enzyme E2I (UBC9 homolog, yeast)	1.82e-11	0.773751	0.0801462	0.93565	0.118004	0.481261	0.941668	0.61797	0	0	NA	NA	NA
X100135028_TGI_at	100135028_TGI_at	NM_001112	ADARB1	adenosine deaminase, RNA-specific, B1 (RED1 homolog rat)	3.73e-11	0.679164	0.000278706	0.823516	0.00201858	0.0365351	0.805773	0.0964394	0	0	NA	NA	NA
X100135032_TGI_at	100135032_TGI_at	NM_000584	IL8	interleukin 8	6.98e-07	2.533	0.00248353	1.54982	0.00916885	0.55655	1.084	0.683598	0	0	NA	NA	NA
X100135068_TGI_at	100135068_TGI_at	NM_006633	IQGAP2	IQ motif containing GTPase activating protein 2	1.92e-07	1.32091	0.000749376	1.18331	0.00406606	0.020453	1.20414	0.0642494	0	0	NA	NA	NA
X100135088_TGI_at	100135088_TGI_at	NM_003081	SNAP25	synaptosomal-associated protein, 25kDa	2.56e-09	2.09893	0.00106235	1.5446	0.00501309	0.411774	1.14259	0.552978	0	0	NA	NA	NA
X100135102_TGI_at	100135102_TGI_at	AI363185			6.35e-08	1.39084	0.0301905	1.14581	0.055255	0.284058	1.15197	0.421122	0	0	NA	NA	NA
X100135144_TGI_at	100135144_TGI_at	NM_001033578	SGK3	serum/glucocorticoid regulated kinase family, member 3	1.82e-10	1.3519	1.32e-05	1.1951	0.000318541	0.140182	1.1181	0.252829	0	0	NA	NA	NA
X100135186_TGI_at	100135186_TGI_at	NM_004497	FOXA3	forkhead box A3	1.27e-07	1.33674	0.0912966	1.1455	0.131185	0.203149	1.16652	0.330515	0	0	NA	NA	NA
X100135215_TGI_at	100135215_TGI_at	AK095461	VNN1	vanin 1	2.01e-07	1.55476	0.0799402	1.23814	0.117862	0.15598	1.22544	0.273071	0	0	NA	NA	NA
X100135298_TGI_at	100135298_TGI_at	NM_003679	KMO	kynurenine 3-monooxygenase (kynurenine 3-hydroxylase)	1.81e-13	1.87535	1.17e-06	1.59899	6.95e-05	0.000276376	1.7053	0.00476343	0	1	U2	U2	U1
X100135319_TGI_at	100135319_TGI_at	NM_138370		protein kinase-like protein SgK493	5.84e-08	0.718397	0.00616921	0.8328	0.017411	0.579048	0.967705	0.700553	0	0	NA	NA	NA
X100135342_TGI_at	100135342_TGI_at	NM_002742	PRKD1	protein kinase D1	1.06e-11	0.743681	0.00106235	0.855784	0.00501309	0.110977	0.892115	0.212903	0	0	NA	NA	NA
X100135350_TGI_at	100135350_TGI_at	BC036485			1.06e-08	1.33276	9.65e-06	1.2393	0.000266398	0.179079	1.15175	0.304576	0	0	NA	NA	NA
X100135351_TGI_at	100135351_TGI_at	BC066363	SDK2	sidekick homolog 2 (chicken)	1.06e-06	1.26898	0.000941238	1.21369	0.0046456	0.215347	0.888766	0.344449	0	0	NA	NA	NA
X100135383_TGI_at	100135383_TGI_at	NM_004556	NFKBIE	nuclear factor of kappa light polypeptide gene enhancer in B-cells inhibitor, epsilon	2.58e-07	1.45604	0.192545	1.12753	0.240998	0.0126269	1.30549	0.0464474	0	0	NA	NA	NA
X100135436_TGI_at	100135436_TGI_at	NM_014475	DHDH	dihydrodiol dehydrogenase (dimeric)	6.86e-10	1.51123	0.00367466	1.1924	0.0121222	0.0126963	1.32588	0.0464474	0	1	U2	U2	U1
X100135447_TGI_at	100135447_TGI_at	NM_001001974	PLEKHA1	pleckstrin homology domain containing, family A (phosphoinositide binding specific) member 1	5.05e-07	0.830869	0.920877	0.99247	0.928076	0.912667	0.992002	0.951874	0	0	NA	NA	NA
X100135453_TGI_at	100135453_TGI_at	NM_001007224	GIMAP6	GTPase, IMAP family member 6	3.1e-14	0.647957	8.62e-05	0.818924	0.000964198	0.810392	1.04176	0.881205	0	0	NA	NA	NA
X100135454_TGI_at	100135454_TGI_at	CF552990	PALLD	palladin, cytoskeletal associated protein	3.86e-08	0.783141	0.572239	0.94567	0.607886	0.32334	0.884649	0.462756	0	0	NA	NA	NA
X100135471_TGI_at	100135471_TGI_at	NM_001005914	SEMA3B	sema domain, immunoglobulin domain (Ig), short basic domain, secreted, (semaphorin) 3B	2.62e-13	0.647725	0.00232563	0.75368	0.00875644	0.802816	0.998104	0.876241	0	0	NA	NA	NA
X100135481_TGI_at	100135481_TGI_at	NM_020548	DBI	diazepam binding inhibitor (GABA receptor modulator, acyl-Coenzyme A binding protein)	2.68e-07	1.26551	0.120573	1.08233	0.162665	0.000863569	1.32164	0.00867067	0	0	NA	NA	NA
X100135501_TGI_at	100135501_TGI_at	NM_003177	SYK	spleen tyrosine kinase	8.71e-15	1.53938	0.0844286	1.10768	0.123463	0.00166052	1.30802	0.0128961	0	0	NA	NA	NA
X100135507_TGI_at	100135507_TGI_at	NM_001099658	LRRN3	leucine rich repeat neuronal 3	1.09e-07	0.705765	0.0381333	0.849133	0.0660063	0.567747	0.91061	0.691814	0	0	NA	NA	NA
X100135521_TGI_at	100135521_TGI_at	NM_031280	MRPS15	mitochondrial ribosomal protein S15	2.81e-12	1.2909	0.0210394	1.09094	0.0424875	0.00137087	1.19538	0.0113874	0	1	U6	U1	U1
X100135523_TGI_at	100135523_TGI_at	NM_194284	CLDN23	claudin 23	8.15e-09	1.24927	0.0915276	1.06902	0.131432	0.229011	1.13798	0.360578	0	0	NA	NA	NA
X100135529_TGI_at	100135529_TGI_at	NM_175629	DNMT3A	DNA (cytosine-5-)-methyltransferase 3 alpha	2.72e-07	1.26706	0.00907964	1.0917	0.0230544	0.953827	0.998833	0.974385	0	0	NA	NA	NA
X100135540_TGI_at	100135540_TGI_at	AK024050	UBE2W	ubiquitin-conjugating enzyme E2W (putative)	3.64e-09	1.38715	0.00362091	1.16844	0.0119817	0.276599	1.11597	0.413487	0	0	NA	NA	NA
X100135554_TGI_at	100135554_TGI_at	BX641069	LPCAT2	lysophosphatidylcholine acyltransferase 2	2.37e-08	1.47446	0.000260942	1.25477	0.00195132	0.262075	1.20264	0.39749	0	0	NA	NA	NA
X100135568_TGI_at	100135568_TGI_at	ENST00000360121	SPN	sialophorin	1.59e-09	1.49506	0.465781	1.08294	0.507853	0.00523506	1.59024	0.0257204	0	0	NA	NA	NA
X100135603_TGI_at	100135603_TGI_at	NM_017686	GDAP2	ganglioside induced differentiation associated protein 2	3.48e-08	1.21988	0.00585707	1.13026	0.0166761	0.131303	1.11045	0.240586	0	0	NA	NA	NA
X100135617_TGI_at	100135617_TGI_at	ENST00000308894			3.44e-09	0.640134	0.000595067	0.73529	0.00343095	0.299374	1.20519	0.437986	0	0	NA	NA	NA
X100135634_TGI_at	100135634_TGI_at	NM_005544	IRS1	insulin receptor substrate 1	2.75e-10	0.740309	6.64e-06	0.794094	0.000217231	0.000295359	0.780555	0.0048727	0	1	D2	D3	D1
X100135660_TGI_at	100135660_TGI_at	NM_175834	KRT79	keratin 79	6.22e-16	4.0531	1.89e-08	2.61412	4.82e-06	0.00746098	1.93799	0.0329407	0	1	U1	U2	U1
X100135716_TGI_at	100135716_TGI_at	NM_030769	NPL	N-acetylneuraminate pyruvate lyase (dihydrodipicolinate synthase)	1.36e-11	1.83701	0.00143224	1.30646	0.00630615	7.16e-05	1.68319	0.0026221	0	1	U5	U1	U1
X100135727_TGI_at	100135727_TGI_at	NM_001763	CD1A	CD1a molecule	7.25e-19	5.58681	5.2e-08	3.05502	8.82e-06	0.000899478	2.12747	0.00894758	0	1	U2	U2	U1
X100135737_TGI_at	100135737_TGI_at	NM_202000	ACSM3	acyl-CoA synthetase medium-chain family member 3	8.4e-09	1.47475	0.00167952	1.32048	0.00709664	0.000753789	1.40775	0.00791355	0	1	U2	U1	U1
X100135740_TGI_at	100135740_TGI_at	AA904425			2.04e-07	0.734785	0.112555	0.928286	0.153702	0.9934	1.10277	0.995253	0	0	NA	NA	NA
X100135755_TGI_at	100135755_TGI_at	ENST00000260010	TLR2	toll-like receptor 2	3.64e-09	1.29433	0.772185	1.03435	0.792596	0.0399015	1.17771	0.101662	0	0	NA	NA	NA
X100135806_TGI_at	100135806_TGI_at	BC042197	MFSD1	major facilitator superfamily domain containing 1	3.64e-09	1.26882	0.00402859	1.1271	0.0128683	0.0365351	1.22941	0.0964394	0	0	NA	NA	NA
X100135813_TGI_at	100135813_TGI_at	NM_003974	DOK2	docking protein 2, 56kDa	2.02e-09	1.38326	0.253581	1.09976	0.302588	0.00304516	1.37129	0.0185962	0	0	NA	NA	NA
X100135818_TGI_at	100135818_TGI_at	NM_018473	THEM2	thioesterase superfamily member 2	8.76e-11	1.32285	3.36e-05	1.20049	0.000528049	2.5e-05	1.33828	0.00178991	0	1	U2	U3	U1
X100135832_TGI_at	100135832_TGI_at	NM_031924	RSPH3	radial spoke 3 homolog (Chlamydomonas)	1.28e-08	1.2377	0.0525818	1.10153	0.0848204	0.315016	1.08489	0.454361	0	0	NA	NA	NA
X100135836_TGI_at	100135836_TGI_at	NM_000044	AR	androgen receptor	6.99e-13	0.721162	0.01573	0.842459	0.034117	0.0320831	0.843004	0.0883194	0	0	NA	NA	NA
X100135885_TGI_at	100135885_TGI_at	NM_016445	PLEK2	pleckstrin 2	5.67e-09	1.65476	0.00117519	1.28937	0.00537255	0.84613	1.01831	0.906475	0	0	NA	NA	NA
X100135909_TGI_at	100135909_TGI_at	NM_005276	GPD1	glycerol-3-phosphate dehydrogenase 1 (soluble)	1.22e-12	2.07258	0.000712771	1.77757	0.0039069	0.000137814	2.67768	0.00370146	0	1	U2	U1	U1
X100135921_TGI_at	100135921_TGI_at	NM_032108	SEMA6B	sema domain, transmembrane domain (TM), and cytoplasmic domain, (semaphorin) 6B	1.05e-09	2.1413	0.00203632	1.36161	0.00809608	0.0867106	1.39758	0.179492	0	0	NA	NA	NA
X100135929_TGI_at	100135929_TGI_at	NM_000262	NAGA	N-acetylgalactosaminidase, alpha-	7.82e-10	1.27974	0.00547549	1.09472	0.0160286	0.000256336	1.27303	0.00460016	0	1	U1	U1	U1
X100135932_TGI_at	100135932_TGI_at	NM_007048	BTN3A1	butyrophilin, subfamily 3, member A1	1.02e-09	0.734015	0.140775	0.918904	0.184663	0.0633093	0.878414	0.144202	0	0	NA	NA	NA
X100135947_TGI_at	100135947_TGI_at	NM_005745	BCAP31	B-cell receptor-associated protein 31	1.26e-11	1.21306	0.436859	1.01972	0.481037	0.00753716	1.24076	0.0330507	0	0	NA	NA	NA
X100135979_TGI_at	100135979_TGI_at	NM_018643	TREM1	triggering receptor expressed on myeloid cells 1	2.24e-08	1.41142	0.0883738	1.17078	0.127813	0.000647022	1.66538	0.00742119	0	0	NA	NA	NA
X100135981_TGI_at	100135981_TGI_at	NM_002416	CXCL9	chemokine (C-X-C motif) ligand 9	4.22e-08	0.450077	0.0307958	0.683068	0.0561395	0.209185	0.661708	0.337324	0	0	NA	NA	NA
X100135985_TGI_at	100135985_TGI_at	NM_018043	ANO1	anoctamin 1, calcium activated chloride channel	4.84e-14	0.553268	0.0312381	0.851177	0.0566576	0.0238896	0.814695	0.0714251	0	0	NA	NA	NA
X100136005_TGI_at	100136005_TGI_at	X60502	SPN	sialophorin	9.93e-13	1.49071	0.0753216	1.1797	0.11239	6.19e-05	1.57629	0.00234575	0	0	NA	NA	NA
X100136008_TGI_at	100136008_TGI_at	L32185	SLC11A1	solute carrier family 11 (proton-coupled divalent metal ion transporters), member 1	1.46e-10	1.79	0.0290796	1.21995	0.0537714	0.0120105	1.57785	0.0449123	0	0	NA	NA	NA
X100136015_TGI_at	100136015_TGI_at	ENST00000376438	FRMD3	FERM domain containing 3	9.16e-07	0.744353	0.825464	0.976091	0.841123	0.484848	0.950704	0.621585	0	0	NA	NA	NA
X100136016_TGI_at	100136016_TGI_at	NM_177433	MAGED2	melanoma antigen family D, 2	1.33e-07	0.823112	0.118561	0.935844	0.160488	0.276599	0.924713	0.413487	0	0	NA	NA	NA
X100136024_TGI_at	100136024_TGI_at	NM_021233	DNASE2B	deoxyribonuclease II beta	2.56e-15	4.30553	6.92e-07	2.49743	5.2e-05	3.83e-06	3.11709	0.000832852	1	1	U2	U2	U1
X100136031_TGI_at	100136031_TGI_at	ENST00000379287	GFOD1	glucose-fructose oxidoreductase domain containing 1	7.27e-08	0.73726	9.31e-05	0.76567	0.00101719	0.365926	0.884784	0.503363	0	0	NA	NA	NA
X100136034_TGI_at	100136034_TGI_at	ENST00000339561	CLIC5	chloride intracellular channel 5	2.83e-07	0.75679	0.774391	0.981437	0.794355	0.411774	1.15519	0.552978	0	0	NA	NA	NA
X100136102_TGI_at	100136102_TGI_at	NM_002854	PVALB	parvalbumin	1.49e-10	2.04169	1.08e-06	1.61533	6.67e-05	0.0393835	1.30446	0.101662	0	0	NA	NA	NA
X100136114_TGI_at	100136114_TGI_at	U09197			4.99e-12	0.652497	0.00345483	0.813651	0.011611	0.836152	1.01896	0.898606	0	0	NA	NA	NA
X100136140_TGI_at	100136140_TGI_at	ENST00000381961	IL7R	interleukin 7 receptor	1.01e-06	0.758673	0.249184	0.96205	0.298004	0.856524	0.999668	0.913191	0	0	NA	NA	NA
X100136143_TGI_at	100136143_TGI_at	BC018093	TNIK	TRAF2 and NCK interacting kinase	1.37e-07	1.22043	0.16075	1.06544	0.206249	0.0213657	1.19959	0.0663975	0	0	NA	NA	NA
X100136145_TGI_at	100136145_TGI_at	NM_153705	KDELC2	KDEL (Lys-Asp-Glu-Leu) containing 2	5.84e-07	0.832212	0.0497866	0.914737	0.0812879	0.0281219	0.847006	0.0808537	0	0	NA	NA	NA
X100136163_TGI_at	100136163_TGI_at	NM_033222	PSIP1	PC4 and SFRS1 interacting protein 1	1.5e-10	0.787912	0.110665	0.951406	0.151776	0.00344672	0.820613	0.0196615	0	0	NA	NA	NA
X100136168_TGI_at	100136168_TGI_at	CB243049	NFIB	nuclear factor I/B	3.78e-11	0.804442	0.461096	0.957914	0.503767	0.56004	0.995009	0.687361	0	0	NA	NA	NA
X100136182_TGI_at	100136182_TGI_at	AK001590	C14orf132	chromosome 14 open reading frame 132	4.13e-10	0.725507	0.00542123	0.80543	0.0159276	0.089895	1.21579	0.184145	0	0	NA	NA	NA
X100136196_TGI_at	100136196_TGI_at	NM_052820	CORO2A	coronin, actin binding protein, 2A	5.93e-12	1.40752	0.232169	1.05572	0.281098	0.0186209	1.26286	0.0602562	0	0	NA	NA	NA
X100136226_TGI_at	100136226_TGI_at	ENST00000354181	SLC12A6	solute carrier family 12 (potassium/chloride transporters), member 6	1.52e-07	1.27505	0.00871054	1.17173	0.0223876	0.776307	1.01836	0.856275	0	0	NA	NA	NA
X100136241_TGI_at	100136241_TGI_at	AI921300	CAPN8	calpain 8	3.09e-11	1.64556	0.26715	1.10124	0.316437	0.000429707	1.75939	0.00589339	0	0	NA	NA	NA
X100136258_TGI_at	100136258_TGI_at	BC039603	MLL	myeloid/lymphoid or mixed-lineage leukemia (trithorax homolog, Drosophila)	8.83e-10	0.790242	0.0811357	0.958109	0.119243	0.54546	0.952379	0.674087	0	0	NA	NA	NA
X100136265_TGI_at	100136265_TGI_at	NM_012302	LPHN2	latrophilin 2	1.41e-13	0.699534	0.000323497	0.826765	0.00222784	0.023488	0.83344	0.0704859	0	0	NA	NA	NA
X100136272_TGI_at	100136272_TGI_at	BC010527			6.77e-10	0.609929	0.0568732	0.853049	0.0906092	0.470968	1.12038	0.606929	0	0	NA	NA	NA
X100136307_TGI_at	100136307_TGI_at	NM_018447	TMEM111	transmembrane protein 111	3.03e-13	1.20491	0.0783683	1.04526	0.115863	2.27e-06	1.22752	0.000730441	0	0	NA	NA	NA
X100136314_TGI_at	100136314_TGI_at	NM_018221	MOBKL1B	MOB1, Mps One Binder kinase activator-like 1B (yeast)	1.25e-10	1.53177	0.00149306	1.23426	0.00650288	0.127936	1.1622	0.236568	0	0	NA	NA	NA
X100136337_TGI_at	100136337_TGI_at	AK022020			6.32e-07	0.800793	0.000819932	0.831112	0.00426921	0.888166	0.964691	0.935477	0	0	NA	NA	NA
X100136343_TGI_at	100136343_TGI_at	ENST00000375377	KIAA1462	KIAA1462	5.78e-11	0.684491	0.000940185	0.802054	0.0046456	0.784831	1.00879	0.86155	0	0	NA	NA	NA
X100136348_TGI_at	100136348_TGI_at	NM_018659	CYTL1	cytokine-like 1	7.15e-13	3.15251	3.96e-05	2.02257	0.000591038	0.215347	1.17435	0.344449	0	0	NA	NA	NA
X100136363_TGI_at	100136363_TGI_at	NM_001042508	C6orf124	chromosome 6 open reading frame 124	1e-06	0.754515	0.0188034	0.810219	0.0389733	0.0806094	0.805085	0.170587	0	0	NA	NA	NA
X100136400_TGI_at	100136400_TGI_at	NM_172246	CSF2RA	colony stimulating factor 2 receptor, alpha, low-affinity (granulocyte-macrophage)	2.41e-13	1.76027	0.05989	1.20538	0.0941177	0.00413197	1.43503	0.0221218	0	0	NA	NA	NA
X100136403_TGI_at	100136403_TGI_at	NM_001005910	IHPK2	inositol hexaphosphate kinase 2	3.34e-07	0.786437	0.101247	0.919205	0.142125	0.00459597	0.734415	0.0238532	0	0	NA	NA	NA
X100136418_TGI_at	100136418_TGI_at	NM_015600	ABHD12	abhydrolase domain containing 12	1.88e-11	1.32963	0.104911	1.09509	0.145871	6.19e-05	1.47345	0.00234575	0	0	NA	NA	NA
X100136433_TGI_at	100136433_TGI_at	NM_014210	EVI2A	ecotropic viral integration site 2A	5.87e-08	1.46356	0.00313343	1.15538	0.0108475	0.00883112	1.36133	0.0369645	0	1	U3	U1	U1
X100136438_TGI_at	100136438_TGI_at	BC029358	GPR110	G protein-coupled receptor 110	3.62e-18	2.93134	1.07e-06	1.93464	6.67e-05	0.00137087	1.82297	0.0113874	0	1	U8	U3	U1
X100136479_TGI_at	100136479_TGI_at	AJ227890	AGPAT4	1-acylglycerol-3-phosphate O-acyltransferase 4 (lysophosphatidic acid acyltransferase, delta)	6.42e-07	1.28308	0.0284585	1.13128	0.0529266	0.330381	1.1189	0.471576	0	0	NA	NA	NA
X100136515_TGI_at	100136515_TGI_at	NM_021155	CD209	CD209 molecule	3.7e-07	1.5324	0.00513125	1.48067	0.0154129	0.491674	1.1104	0.62759	0	0	NA	NA	NA
X100136523_TGI_at	100136523_TGI_at	AK122891	ABLIM1	actin binding LIM protein 1	3.58e-10	0.801868	0.0108836	0.905579	0.0261166	0.672949	1.05371	0.774063	0	0	NA	NA	NA
X100136563_TGI_at	100136563_TGI_at	BC005020	PPIF	peptidylprolyl isomerase F (cyclophilin F)	3.39e-10	1.46441	0.0405884	1.11227	0.0692516	0.203149	1.11623	0.330515	0	0	NA	NA	NA
X100136609_TGI_at	100136609_TGI_at	BC003167	PI4K2A	phosphatidylinositol 4-kinase type 2 alpha	6.38e-09	1.32634	0.0445578	1.11006	0.0743323	0.00323958	1.35114	0.0191159	0	0	NA	NA	NA
X100136610_TGI_at	100136610_TGI_at	NM_003282	TNNI2	troponin I type 2 (skeletal, fast)	7.52e-07	1.41953	0.0568433	1.17852	0.0906063	0.177061	1.18828	0.301462	0	0	NA	NA	NA
X100136619_TGI_at	100136619_TGI_at	ENST00000337189	FADS1	fatty acid desaturase 1	1.04e-10	1.35572	0.0442066	1.16711	0.0738609	0.000219748	1.53152	0.00427298	0	0	NA	NA	NA
X100136626_TGI_at	100136626_TGI_at	BU754208	SLC6A4	solute carrier family 6 (neurotransmitter transporter, serotonin), member 4	1.33e-09	0.41385	0.00724971	0.640396	0.0196022	0.601955	1.26175	0.718556	0	0	NA	NA	NA
X100136654_TGI_at	100136654_TGI_at	NM_005194	CEBPB	CCAAT/enhancer binding protein (C/EBP), beta	1.08e-08	1.2304	0.0492156	1.0899	0.0805187	0.901253	0.996529	0.944937	0	0	NA	NA	NA
X100136682_TGI_at	100136682_TGI_at	NM_001017923	C14orf28	chromosome 14 open reading frame 28	3.67e-07	0.7316	0.553089	0.96341	0.589898	0.742053	0.952131	0.830718	0	0	NA	NA	NA
X100136695_TGI_at	100136695_TGI_at	NM_006735	HOXA2	homeobox A2	3.99e-08	0.73596	0.0849513	0.894897	0.124046	0.262075	0.88184	0.39749	0	0	NA	NA	NA
X100136721_TGI_at	100136721_TGI_at	CD370215		hypothetical protein LOC100128501	3.21e-08	1.405	0.651818	1.0164	0.683634	0.590452	0.994617	0.709819	0	0	NA	NA	NA
X100136728_TGI_at	100136728_TGI_at	NM_002064	GLRX	glutaredoxin (thioltransferase)	3.22e-11	1.31205	0.00571705	1.07906	0.0164665	0.136822	1.08573	0.248859	0	0	NA	NA	NA
X100136733_TGI_at	100136733_TGI_at	NM_133459	CCBE1	collagen and calcium binding EGF domains 1	3.04e-07	0.704086	0.210742	0.84405	0.25968	0.0399015	1.42759	0.101662	0	0	NA	NA	NA
X100136757_TGI_at	100136757_TGI_at	ENST00000346874	PARD3	par-3 partitioning defective 3 homolog (C. elegans)	5.94e-11	0.74212	9.83e-05	0.805183	0.00105371	0.721969	0.922036	0.813319	0	0	NA	NA	NA
X100136768_TGI_at	100136768_TGI_at	NM_001039457	ATP6V0B	ATPase, H+ transporting, lysosomal 21kDa, V0 subunit b	1.27e-13	1.40579	0.00381269	1.12016	0.0124809	0.000221405	1.3583	0.00427298	0	1	U2	U1	U1
X100136822_TGI_at	100136822_TGI_at	NM_023940	RASL11B	RAS-like, family 11, member B	8.29e-07	0.666148	0.112642	0.842119	0.153702	0.060804	0.716124	0.140481	0	0	NA	NA	NA
X100136858_TGI_at	100136858_TGI_at	BC070495			3.5e-11	1.86633	3.37e-07	1.8519	3.39e-05	0.267058	1.14735	0.403399	0	0	NA	NA	NA
X100136862_TGI_at	100136862_TGI_at	DQ890647	CAV1	caveolin 1, caveolae protein, 22kDa	2.35e-13	0.746378	0.227927	0.948774	0.276582	0.0431702	1.261	0.107775	0	0	NA	NA	NA
X100136866_TGI_at	100136866_TGI_at	NM_006557	DMRT2	doublesex and mab-3 related transcription factor 2	1.24e-08	0.577245	0.143862	0.868196	0.187796	0.637044	0.961534	0.747431	0	0	NA	NA	NA
X100136878_TGI_at	100136878_TGI_at	NM_019605	SERTAD4	SERTA domain containing 4	1.83e-10	0.739025	0.00247173	0.822719	0.00914623	0.0703031	0.751069	0.154984	0	0	NA	NA	NA
X100136926_TGI_at	100136926_TGI_at	NM_003826	NAPG	N-ethylmaleimide-sensitive factor attachment protein, gamma	3.41e-11	1.32754	0.104577	1.07533	0.145532	0.763111	0.987745	0.846064	0	0	NA	NA	NA
X100136933_TGI_at	100136933_TGI_at	NM_006144	GZMA	granzyme A (granzyme 1, cytotoxic T-lymphocyte-associated serine esterase 3)	5.53e-08	0.647637	0.0723898	0.873769	0.109485	0.721969	1.03999	0.813319	0	0	NA	NA	NA
X100136959_TGI_at	100136959_TGI_at	AY044655	SNX24	sorting nexin 24	2.04e-11	1.33997	0.00216024	1.15887	0.00841892	0.0932857	1.19129	0.188857	0	0	NA	NA	NA
X100136963_TGI_at	100136963_TGI_at	BU622441	FKBP7	FK506 binding protein 7	3.11e-08	0.728889	0.0938559	0.880095	0.133848	0.0488071	0.77659	0.118721	0	0	NA	NA	NA
X100136969_TGI_at	100136969_TGI_at	ENST00000378518	RER1	RER1 retention in endoplasmic reticulum 1 homolog (S. cerevisiae)	7.71e-11	1.21438	0.00185651	1.1004	0.0075645	0.000863569	1.14788	0.00867067	0	1	U5	U1	U1
X100137013_TGI_at	100137013_TGI_at	NM_016112	PKD2L1	polycystic kidney disease 2-like 1	1.14e-06	1.39066	0.14439	1.18386	0.188257	0.00197621	1.4671	0.0146086	0	0	NA	NA	NA
X100137058_TGI_at	100137058_TGI_at	NM_004347	CASP5	caspase 5, apoptosis-related cysteine peptidase	1.82e-07	1.56333	0.0532305	1.25404	0.0856428	0.0267046	1.40394	0.0779611	0	0	NA	NA	NA
X100137103_TGI_at	100137103_TGI_at	NM_173505	ANKRD29	ankyrin repeat domain 29	8.5e-07	0.799867	0.107587	0.910016	0.14863	0.32334	1.26342	0.462756	0	0	NA	NA	NA
X100137126_TGI_at	100137126_TGI_at	AM393174		DKFZP564O0823 protein	3.87e-09	1.40633	0.000935197	1.21147	0.0046456	0.020453	1.42707	0.0642494	0	0	NA	NA	NA
X100137144_TGI_at	100137144_TGI_at	AI263926			3.06e-09	0.704136	0.0174907	0.866745	0.0367728	0.110977	0.863429	0.212903	0	0	NA	NA	NA
X100137153_TGI_at	100137153_TGI_at	NM_152913	TMEM130	transmembrane protein 130	3.23e-09	1.82218	2.38e-05	1.4999	0.000441117	0.10722	1.2615	0.208175	0	0	NA	NA	NA
X100137174_TGI_at	100137174_TGI_at	NM_001803	CD52	CD52 molecule	3.71e-10	1.29431	0.0134504	1.14576	0.0303026	0.000221405	1.66531	0.00427298	0	1	U1	U1	U1
X100137190_TGI_at	100137190_TGI_at	BC008968	MYH10	myosin, heavy chain 10, non-muscle	3.74e-10	0.775564	0.447887	0.977158	0.490667	0.618369	0.940968	0.731646	0	0	NA	NA	NA
X100137227_TGI_at	100137227_TGI_at	NM_000761	CYP1A2	cytochrome P450, family 1, subfamily A, polypeptide 2	2.56e-14	2.46142	4.28e-07	2.09307	3.99e-05	0.000163845	2.08209	0.00402842	0	1	U1	U2	U1
X100137230_TGI_at	100137230_TGI_at	ENST00000336687	TMEM97	transmembrane protein 97	6.3e-09	1.33375	0.0132476	1.13295	0.0300475	8.46e-05	1.53296	0.00284068	0	1	U1	U1	U1
X100137243_TGI_at	100137243_TGI_at	NM_022136	SAMSN1	SAM domain, SH3 domain and nuclear localization signals 1	4.83e-08	1.54266	0.0299271	1.17774	0.0549828	0.613557	1.01128	0.72702	0	0	NA	NA	NA
X100137261_TGI_at	100137261_TGI_at	ENST00000371489	FER1L3	fer-1-like 3, myoferlin (C. elegans)	5.84e-08	1.26117	0.0934945	1.04969	0.133569	0.0721025	1.20678	0.157337	0	0	NA	NA	NA
X100137293_TGI_at	100137293_TGI_at	AK025806			7.7e-07	0.810747	0.000125665	0.837706	0.00119474	0.567747	0.985927	0.691814	0	0	NA	NA	NA
X100137321_TGI_at	100137321_TGI_at	NM_030762	BHLHB3	basic helix-loop-helix domain containing, class B, 3	1.02e-15	2.10587	1.62e-05	1.53916	0.000349371	0.00635911	1.38791	0.0292374	0	1	U2	U2	U1
X100137323_TGI_at	100137323_TGI_at	AF123757	CLN8	ceroid-lipofuscinosis, neuronal 8 (epilepsy, progressive with mental retardation)	2.24e-07	1.23251	0.00680141	1.15661	0.0187679	7.39e-05	1.27679	0.00264762	0	1	U1	U3	U1
X100137333_TGI_at	100137333_TGI_at	NM_145728	SYNM	synemin, intermediate filament protein	8.67e-09	0.773577	0.0681031	0.886488	0.104472	0.0397198	0.805122	0.101662	0	0	NA	NA	NA
X100137382_TGI_at	100137382_TGI_at	BU783420	CALM3	calmodulin 3 (phosphorylase kinase, delta)	5.87e-07	1.23283	0.485656	1.03505	0.526672	0.0320831	1.17533	0.0883194	0	0	NA	NA	NA
X100137392_TGI_at	100137392_TGI_at	BC040195			2.56e-10	0.58788	0.00203632	0.710988	0.00809608	0.157519	0.886335	0.275316	0	0	NA	NA	NA
X100137393_TGI_at	100137393_TGI_at	NM_002095	GTF2E2	general transcription factor IIE, polypeptide 2, beta 34kDa	3.33e-11	1.20456	0.435129	1.02175	0.479461	0.25976	0.940793	0.395282	0	0	NA	NA	NA
X100137404_TGI_at	100137404_TGI_at	AK098193	ARHGAP24	Rho GTPase activating protein 24	1.4e-12	0.789383	0.0220069	0.902743	0.0439729	0.33998	1.05115	0.480594	0	0	NA	NA	NA
X100137417_TGI_at	100137417_TGI_at	NM_004845	PCYT1B	phosphate cytidylyltransferase 1, choline, beta	2.06e-10	0.595987	1.22e-05	0.596293	0.000305875	0.00271917	0.634128	0.0172517	0	1	D6	D3	D1
X100137440_TGI_at	100137440_TGI_at	CB321733	KAL1	Kallmann syndrome 1 sequence	6.79e-11	1.39098	0.00459572	1.25737	0.014256	0.016931	1.4201	0.0564309	0	0	NA	NA	NA
X100137456_TGI_at	100137456_TGI_at	NM_198552	FAM89A	family with sequence similarity 89, member A	6.34e-11	1.35162	0.0614522	1.11872	0.0960874	0.0567422	1.17568	0.133004	0	0	NA	NA	NA
X100137470_TGI_at	100137470_TGI_at	BC062303	SCD	stearoyl-CoA desaturase (delta-9-desaturase)	9.2e-10	1.41186	0.00724971	1.23961	0.0196022	0.00163372	1.57437	0.0128426	0	1	U6	U1	U1
X100137479_TGI_at	100137479_TGI_at	ENST00000298635	KIAA1462	KIAA1462	4.57e-07	0.737852	0.0354708	0.875543	0.0624372	0.393048	0.892845	0.532043	0	0	NA	NA	NA
X100137484_TGI_at	100137484_TGI_at	AK054863	ABI2	abl interactor 2	1.31e-12	0.738236	0.748339	0.992275	0.770574	0.203149	0.884581	0.330515	0	0	NA	NA	NA
X100137488_TGI_at	100137488_TGI_at	BC036296			1.38e-08	0.786557	0.284656	0.941967	0.333981	0.953827	1.01407	0.974385	0	0	NA	NA	NA
X100137544_TGI_at	100137544_TGI_at	NM_000137	FAH	fumarylacetoacetate hydrolase (fumarylacetoacetase)	6.68e-08	1.2454	0.688121	0.991986	0.716117	0.00298893	1.21874	0.0184193	0	0	NA	NA	NA
X100137554_TGI_at	100137554_TGI_at	NM_001031740	MANEAL	mannosidase, endo-alpha-like	3.09e-07	1.30043	0.00275285	1.17733	0.00982551	0.100003	1.19581	0.198467	0	0	NA	NA	NA
X100137557_TGI_at	100137557_TGI_at	NM_001532	SLC29A2	solute carrier family 29 (nucleoside transporters), member 2	3.9e-07	1.28839	0.96425	1.01875	0.967853	0.209323	1.15182	0.337324	0	0	NA	NA	NA
X100137573_TGI_at	100137573_TGI_at	NM_001399	EDA	ectodysplasin A	9.4e-09	0.762155	0.00941102	0.878416	0.023513	0.481261	0.9432	0.61797	0	0	NA	NA	NA
X100137574_TGI_at	100137574_TGI_at	NM_001543	NDST1	N-deacetylase/N-sulfotransferase (heparan glucosaminyl) 1	5.09e-08	0.823161	0.0460321	0.906642	0.0763569	0.0349754	1.25284	0.0937039	0	0	NA	NA	NA
X100137591_TGI_at	100137591_TGI_at	BC027588	RP5-1022P6.2	hypothetical protein KIAA1434	4.2e-09	1.48305	0.00248353	1.22399	0.00916885	0.0931708	1.15416	0.188857	0	0	NA	NA	NA
X100137598_TGI_at	100137598_TGI_at	NM_000098	CPT2	carnitine palmitoyltransferase II	2.02e-11	1.24933	0.122671	1.0962	0.165219	0.0103148	1.27682	0.0409613	0	0	NA	NA	NA
X100137613_TGI_at	100137613_TGI_at	ENST00000368870	RFX5	regulatory factor X, 5 (influences HLA class II expression)	3.83e-07	1.28266	0.359538	1.0621	0.406736	0.0103148	1.23385	0.0409613	0	0	NA	NA	NA
X100137640_TGI_at	100137640_TGI_at	BC042629	TYSND1	trypsin domain containing 1	2.75e-07	1.24748	0.110979	1.04796	0.152076	0.197238	1.11551	0.324668	0	0	NA	NA	NA
X100137653_TGI_at	100137653_TGI_at	NM_024630	ZDHHC14	zinc finger, DHHC-type containing 14	1.03e-07	0.787482	0.106352	0.934487	0.147429	0.736969	0.989663	0.8256	0	0	NA	NA	NA
X100137655_TGI_at	100137655_TGI_at	NM_033380	COL4A5	collagen, type IV, alpha 5	1.04e-08	0.737269	0.0894491	0.915037	0.129106	0.0643304	0.838401	0.144788	0	0	NA	NA	NA
X100137720_TGI_at	100137720_TGI_at	NM_002815	PSMD11	proteasome (prosome, macropain) 26S subunit, non-ATPase, 11	9.57e-10	1.21355	0.0289221	1.07085	0.0535416	0.0189804	1.13638	0.0608694	0	0	NA	NA	NA
X100137745_TGI_at	100137745_TGI_at	NM_005920	MEF2D	myocyte enhancer factor 2D	3.77e-08	0.832755	0.246093	0.966297	0.294964	0.411774	0.950695	0.552978	0	0	NA	NA	NA
X100137755_TGI_at	100137755_TGI_at	AB050194	ATXN3	ataxin 3	1.41e-12	1.44028	0.0770507	1.09235	0.114387	0.140182	1.14475	0.252829	0	0	NA	NA	NA
X100137809_TGI_at	100137809_TGI_at	NM_014186	COMMD9	COMM domain containing 9	1.45e-12	1.26643	0.166579	1.06945	0.212376	0.00281249	1.24352	0.017739	0	0	NA	NA	NA
X100137814_TGI_at	100137814_TGI_at	NM_002965	S100A9	S100 calcium binding protein A9	3.01e-07	1.47268	0.835875	0.972572	0.850422	0.100344	1.3114	0.198776	0	0	NA	NA	NA
X100137819_TGI_at	100137819_TGI_at	BX118690			2.3e-07	1.37512	0.0103707	1.20784	0.0252452	0.431008	1.07677	0.56862	0	0	NA	NA	NA
X100137821_TGI_at	100137821_TGI_at	NM_022052	NXF3	nuclear RNA export factor 3	1.59e-08	0.609896	0.109391	0.853439	0.150284	0.9934	1.00046	0.995253	0	0	NA	NA	NA
X100137870_TGI_at	100137870_TGI_at	AF173378	MRTO4	mRNA turnover 4 homolog (S. cerevisiae)	7.5e-08	1.25567	0.0984351	1.06687	0.138722	0.365926	1.07623	0.503363	0	0	NA	NA	NA
X100137882_TGI_at	100137882_TGI_at	BM547919	EFHD2	EF-hand domain family, member D2	7.19e-08	1.48018	0.00990654	1.1785	0.0245229	0.000253386	1.46027	0.00460016	0	1	U2	U1	U1
X100137939_TGI_at	100137939_TGI_at	NM_024875	SYNPO2L	synaptopodin 2-like	1.28e-08	0.687563	0.116269	0.873494	0.15805	0.618369	1.07307	0.731646	0	0	NA	NA	NA
X100137941_TGI_at	100137941_TGI_at	NM_002223.1	ITPR2	inositol 1,4,5-triphosphate receptor, type 2	2.78e-09	1.30237	0.000128626	1.18428	0.00120476	0.0126269	1.19384	0.0464474	0	1	U7	U2	U1
X100137945_TGI_at	100137945_TGI_at	BC101645	GCOM1	GRINL1A complex locus	1.99e-10	0.635519	0.386719	0.901511	0.433378	0.269271	1.1851	0.405164	0	0	NA	NA	NA
X100137980_TGI_at	100137980_TGI_at	AK096761		hypothetical protein LOC284080	7.59e-09	0.632643	0.000145381	0.713256	0.00129437	0.276599	0.868906	0.413487	0	0	NA	NA	NA
X100137990_TGI_at	100137990_TGI_at	NM_004567	PFKFB4	6-phosphofructo-2-kinase/fructose-2,6-biphosphatase 4	1.7e-08	1.34596	0.0375037	1.14882	0.0653022	0.365926	1.129	0.503363	0	0	NA	NA	NA
X100138029_TGI_at	100138029_TGI_at	ENST00000313875	LIMCH1	LIM and calponin homology domains 1	1.44e-08	0.811162	0.892924	0.976244	0.902444	0.185789	1.18584	0.311549	0	0	NA	NA	NA
X100138035_TGI_at	100138035_TGI_at	AL832168			4.45e-08	1.24181	0.016503	1.14786	0.0353417	0.180248	1.10848	0.304954	0	0	NA	NA	NA
X100138058_TGI_at	100138058_TGI_at	AK125235	LRCH3	leucine-rich repeats and calponin homology (CH) domain containing 3	3.19e-11	0.802259	0.0905348	0.940322	0.130333	0.914366	1.02091	0.951874	0	0	NA	NA	NA
X100138082_TGI_at	100138082_TGI_at	NM_015364	LY96	lymphocyte antigen 96	1.17e-13	1.69305	0.000368513	1.20616	0.00245396	0.0163013	1.26339	0.0552339	0	0	NA	NA	NA
X100138094_TGI_at	100138094_TGI_at	AK125718	ATAD2B	ATPase family, AAA domain containing 2B	1.18e-06	1.21302	0.000144665	1.15856	0.00129156	0.590452	1.04106	0.709819	0	0	NA	NA	NA
X100138098_TGI_at	100138098_TGI_at	ENST00000370721	LPHN2	latrophilin 2	9.05e-11	0.667465	0.0184225	0.839904	0.0382575	0.491674	0.917323	0.62759	0	0	NA	NA	NA
X100138129_TGI_at	100138129_TGI_at	ENST00000302728	SVEP1	sushi, von Willebrand factor type A, EGF and pentraxin domain containing 1	1.59e-08	0.755102	0.302923	0.918434	0.352208	0.152409	0.883604	0.268717	0	0	NA	NA	NA
X100138166_TGI_at	100138166_TGI_at	AK001912	CPSF2	cleavage and polyadenylation specific factor 2, 100kDa	2.96e-09	1.27855	0.0178019	1.13195	0.0372086	0.357146	1.12095	0.494451	0	0	NA	NA	NA
X100138168_TGI_at	100138168_TGI_at	AI963994	TACC1	transforming, acidic coiled-coil containing protein 1	4.02e-07	0.812676	0.81378	0.996935	0.83053	0.618315	1.04995	0.731646	0	0	NA	NA	NA
X100138170_TGI_at	100138170_TGI_at	NM_018930	PCDHB10	protocadherin beta 10	5.31e-07	0.651937	0.445215	0.925987	0.488662	0.0931708	0.756711	0.188857	0	0	NA	NA	NA
X100138175_TGI_at	100138175_TGI_at	NM_004848	C1orf38	chromosome 1 open reading frame 38	2.65e-11	1.45193	0.002979	1.16481	0.010459	0.00122188	1.34769	0.0107014	0	1	U5	U1	U1
X100138180_TGI_at	100138180_TGI_at	AK056245			3.23e-11	1.45919	2.16e-05	1.2462	0.000410363	0.244067	1.09903	0.378005	0	0	NA	NA	NA
X100138219_TGI_at	100138219_TGI_at	DC354601	FGA	fibrinogen alpha chain	1.03e-09	1.74772	2.78e-05	2.05339	0.000479188	0.00264539	1.46489	0.0172244	0	1	U2	U2	U1
X100138248_TGI_at	100138248_TGI_at	AK123079		hypothetical protein LOC100128893	3.73e-07	0.832325	0.0518058	0.901779	0.0839731	0.772133	1.00298	0.852547	0	0	NA	NA	NA
X100138306_TGI_at	100138306_TGI_at	NM_004805	POLR2D	polymerase (RNA) II (DNA directed) polypeptide D	3.8e-07	1.20105	0.306581	1.05722	0.355563	0.393048	1.06554	0.532043	0	0	NA	NA	NA
X100138311_TGI_at	100138311_TGI_at	NM_014293	NPTXR	neuronal pentraxin receptor	7.9e-07	0.791263	0.00866158	0.870295	0.0222795	0.0028869	0.804527	0.0178932	0	1	D1	D1	D1
X100138331_TGI_at	100138331_TGI_at	NM_015090	NFASC	neurofascin homolog (chicken)	1.87e-10	0.71028	0.017706	0.876168	0.0371526	0.504462	0.929747	0.639606	0	0	NA	NA	NA
X100138336_TGI_at	100138336_TGI_at	NM_006573	TNFSF13B	tumor necrosis factor (ligand) superfamily, member 13b	4.53e-10	1.42294	0.162487	1.10747	0.208228	0.0155445	1.30978	0.0529599	0	0	NA	NA	NA
X100138360_TGI_at	100138360_TGI_at	NM_032995	ARHGEF4	Rho guanine nucleotide exchange factor (GEF) 4	4e-07	0.749669	0.0162684	0.837589	0.035002	0.810392	0.982684	0.881205	0	0	NA	NA	NA
X100138368_TGI_at	100138368_TGI_at	NM_004878	PTGES	prostaglandin E synthase	1.05e-09	1.57137	0.710338	1.06731	0.735675	0.836152	1.03283	0.898606	0	0	NA	NA	NA
X100138388_TGI_at	100138388_TGI_at	NM_012304	FBXL7	F-box and leucine-rich repeat protein 7	2.05e-08	0.77986	0.0622629	0.898892	0.0970843	0.00568591	0.832905	0.0271492	0	0	NA	NA	NA
X100138450_TGI_at	100138450_TGI_at	NM_001238	CCNE1	cyclin E1	2.12e-08	1.39067	0.000437679	1.32186	0.00276055	0.0132706	1.22713	0.0481115	0	1	U1	U1	U1
X100138457_TGI_at	100138457_TGI_at	NM_001005376	PLAUR	plasminogen activator, urokinase receptor	5.52e-15	2.1014	1.8e-05	1.46929	0.0003666	0.000137814	1.53926	0.00370146	0	1	U5	U3	U1
X100138461_TGI_at	100138461_TGI_at	AA810907			1.26e-10	1.57817	0.0201092	1.20814	0.0410204	0.197238	1.17677	0.324668	0	0	NA	NA	NA
X100138479_TGI_at	100138479_TGI_at	NM_005393	PLXNB3	plexin B3	1.5e-08	0.733873	0.00521387	0.821569	0.0155451	0.0468646	0.78086	0.114688	0	0	NA	NA	NA
X100138492_TGI_at	100138492_TGI_at	BX370011	LDB2	LIM domain binding 2	2.95e-11	0.652198	0.00365042	0.819396	0.012067	0.648925	1.04716	0.755322	0	0	NA	NA	NA
X100138521_TGI_at	100138521_TGI_at	NM_006005	WFS1	Wolfram syndrome 1 (wolframin)	1.52e-08	0.812977	0.00418961	0.862849	0.0132254	0.347588	1.05802	0.486869	0	0	NA	NA	NA
X100138535_TGI_at	100138535_TGI_at	BG251250	DST	dystonin	1.38e-10	0.790779	0.0839292	0.939741	0.122845	0.754854	0.990701	0.840088	0	0	NA	NA	NA
X100138594_TGI_at	100138594_TGI_at	NM_015326	SRGAP2	SLIT-ROBO Rho GTPase activating protein 2	1.18e-08	0.79293	3.35e-06	0.832085	0.000134812	0.953827	0.994554	0.974385	0	0	NA	NA	NA
X100138605_TGI_at	100138605_TGI_at	NM_001080479		Rho-guanine nucleotide exchange factor	1.56e-08	1.38797	0.724586	1.05792	0.748563	0.248076	1.12076	0.381464	0	0	NA	NA	NA
X100138606_TGI_at	100138606_TGI_at	BC040168	ERG	v-ets erythroblastosis virus E26 oncogene homolog (avian)	4.17e-10	0.740246	0.000620715	0.858057	0.00353457	0.914366	0.966106	0.951874	0	0	NA	NA	NA
X100138611_TGI_at	100138611_TGI_at	M90656	GCLC	glutamate-cysteine ligase, catalytic subunit	1.44e-08	1.34548	0.0229228	1.18431	0.0453531	0.940656	1.00109	0.965521	0	0	NA	NA	NA
X100138620_TGI_at	100138620_TGI_at	NM_015060	AVL9	AVL9 homolog (S. cerevisiase)	4.05e-11	1.39878	0.00458055	1.1424	0.0142364	0.716663	0.955115	0.809322	0	0	NA	NA	NA
X100138623_TGI_at	100138623_TGI_at	NM_020717	SHROOM4	shroom family member 4	8.49e-08	0.735965	0.159247	0.899356	0.204646	0.587187	0.976778	0.708272	0	0	NA	NA	NA
X100138671_TGI_at	100138671_TGI_at	ENST00000367623	ABL2	v-abl Abelson murine leukemia viral oncogene homolog 2 (arg, Abelson-related gene)	5.53e-07	1.40629	0.0459165	1.18	0.076283	0.194183	0.828854	0.322272	0	0	NA	NA	NA
X100138709_TGI_at	100138709_TGI_at	NM_001039618	CREBZF	CREB/ATF bZIP transcription factor	2.14e-08	0.762858	0.612987	0.973703	0.646908	0.020453	0.864326	0.0642494	0	0	NA	NA	NA
X100138738_TGI_at	100138738_TGI_at	NM_004336	BUB1	BUB1 budding uninhibited by benzimidazoles 1 homolog (yeast)	1.29e-07	1.47688	0.0056156	1.36896	0.0162908	0.060804	1.21534	0.140481	0	0	NA	NA	NA
X100138743_TGI_at	100138743_TGI_at	BM981427	ZNRF2	zinc and ring finger 2	7.18e-07	1.34899	0.120454	1.0841	0.162665	0.939477	0.980338	0.965521	0	0	NA	NA	NA
X100138752_TGI_at	100138752_TGI_at	BC050439	VPS36	vacuolar protein sorting 36 homolog (S. cerevisiae)	1.68e-07	1.21662	0.025681	1.09297	0.0491216	0.926061	1.00296	0.959351	0	0	NA	NA	NA
X100138774_TGI_at	100138774_TGI_at	NM_002631	PGD	phosphogluconate dehydrogenase	6.37e-17	1.65049	0.00121933	1.19308	0.00551823	0.000370278	1.33824	0.00537129	0	1	U6	U1	U1
X100138777_TGI_at	100138777_TGI_at	NM_130852	PLUNC	palate, lung and nasal epithelium associated	2.59e-13	13.7483	0.00171289	3.26909	0.00718833	0.55655	0.793937	0.683598	0	0	NA	NA	NA
X100138781_TGI_at	100138781_TGI_at	NM_014790	JAKMIP2	janus kinase and microtubule interacting protein 2	4.44e-09	1.60707	0.00195995	1.49815	0.00790483	0.152591	1.27133	0.268891	0	0	NA	NA	NA
X100138801_TGI_at	100138801_TGI_at	NM_000820	GAS6	growth arrest-specific 6	8.21e-11	0.805584	0.287219	0.958066	0.336132	0.284058	1.10755	0.421122	0	0	NA	NA	NA
X100138809_TGI_at	100138809_TGI_at	NM_002001	FCER1A	Fc fragment of IgE, high affinity I, receptor for; alpha polypeptide	3.9e-14	1.97948	0.000972843	1.70385	0.00474238	0.0776894	1.52486	0.166153	0	0	NA	NA	NA
X100138825_TGI_at	100138825_TGI_at	ENST00000368918	GABPB2	GA binding protein transcription factor, beta subunit 2	4.22e-09	0.784804	0.447155	0.965042	0.490198	0.22247	0.907487	0.352691	0	0	NA	NA	NA
X100138838_TGI_at	100138838_TGI_at	AF533230	USP32	ubiquitin specific peptidase 32	7.29e-10	1.28872	0.444468	1.0062	0.488249	0.579048	1.06092	0.700553	0	0	NA	NA	NA
X100138861_TGI_at	100138861_TGI_at	ENST00000373985	PRKG1	protein kinase, cGMP-dependent, type I	3.49e-07	0.79448	0.0532777	0.916557	0.0856428	0.127027	0.873936	0.235834	0	0	NA	NA	NA
X100138878_TGI_at	100138878_TGI_at	BM714521			6.65e-10	0.690597	0.000416916	0.76254	0.00268744	0.721969	1.06876	0.813319	0	0	NA	NA	NA
X100138880_TGI_at	100138880_TGI_at	NM_001628	AKR1B1	aldo-keto reductase family 1, member B1 (aldose reductase)	1.03e-10	1.25692	0.0072133	1.10445	0.0195365	2.74e-05	1.27254	0.0018051	0	1	U3	U1	U1
X100138892_TGI_at	100138892_TGI_at	NM_001040708	HEY1	hairy/enhancer-of-split related with YRPW motif 1	1.88e-08	0.635777	0.0576161	0.815005	0.0912514	0.131303	0.796268	0.240586	0	0	NA	NA	NA
X100138903_TGI_at	100138903_TGI_at	NM_000507	FBP1	fructose-1,6-bisphosphatase 1	3.62e-14	1.55161	0.000117411	1.33573	0.00115176	0.000992908	1.48487	0.00935714	0	1	U2	U1	U1
X100138908_TGI_at	100138908_TGI_at	AL161983	EIF4E3	eukaryotic translation initiation factor 4E family member 3	8.92e-10	0.756806	0.000413637	0.881575	0.0026824	0.13782	0.894949	0.249969	0	0	NA	NA	NA
X100138918_TGI_at	100138918_TGI_at	NM_002147	HOXB5	homeobox B5	3.41e-11	0.634511	7.18e-05	0.797483	0.000853589	0.0572491	0.809736	0.133609	0	0	NA	NA	NA
X100138919_TGI_at	100138919_TGI_at	BF001669	TBC1D30	TBC1 domain family, member 30	8.28e-11	1.41909	0.0690579	1.087	0.105535	0.0261978	1.18714	0.0766201	0	0	NA	NA	NA
X100138947_TGI_at	100138947_TGI_at	NM_032385	C5orf4	chromosome 5 open reading frame 4	1.93e-10	0.692197	0.000233003	0.757463	0.00180956	0.924556	0.988016	0.959351	0	0	NA	NA	NA
X100138993_TGI_at	100138993_TGI_at	AF410885	ADCY2	adenylate cyclase 2 (brain)	1.82e-07	0.720447	0.00100466	0.72249	0.0048185	7.16e-05	0.518181	0.0026221	0	1	D3	D2	D2
X100138998_TGI_at	100138998_TGI_at	NM_001031615	ALDH3B2	aldehyde dehydrogenase 3 family, member B2	8.34e-13	2.09012	0.000667146	1.52601	0.00371139	0.967011	0.861107	0.980395	0	0	NA	NA	NA
X100138999_TGI_at	100138999_TGI_at	DB356513	MAPRE2	microtubule-associated protein, RP/EB family, member 2	2.53e-12	0.727191	0.21913	0.969478	0.268638	0.491674	0.928224	0.62759	0	0	NA	NA	NA
X100139007_TGI_at	100139007_TGI_at	NM_014634	PPM1F	protein phosphatase 1F (PP2C domain containing)	4.57e-08	0.768686	5.25e-05	0.806924	0.000708252	0.357146	1.09783	0.494451	0	0	NA	NA	NA
X100139031_TGI_at	100139031_TGI_at	AL831999			1.95e-10	0.790084	0.36093	0.97477	0.408025	0.502203	0.967182	0.637495	0	0	NA	NA	NA
X100139034_TGI_at	100139034_TGI_at	NM_001312	CRIP2	cysteine-rich protein 2	6.4e-12	0.716792	1.9e-05	0.786674	0.000379493	0.191452	0.957448	0.318231	0	0	NA	NA	NA
X100139056_TGI_at	100139056_TGI_at	NM_002197	ACO1	aconitase 1, soluble	2.71e-09	1.20763	0.856817	1.03354	0.86977	0.0274207	1.1518	0.0794758	0	0	NA	NA	NA
X100139058_TGI_at	100139058_TGI_at	AK098050	DOCK4	dedicator of cytokinesis 4	2.78e-10	0.75909	0.280275	0.944442	0.329081	0.648002	1.11809	0.755322	0	0	NA	NA	NA
X100139068_TGI_at	100139068_TGI_at	NM_000204	CFI	complement factor I	4.93e-10	1.32885	0.00703973	1.18338	0.0191955	0.257214	1.15799	0.391963	0	0	NA	NA	NA
X100139077_TGI_at	100139077_TGI_at	NM_018066	GPN2	GPN-loop GTPase 2	4.59e-09	1.28556	0.0525818	1.07232	0.0848204	0.00883112	1.16151	0.0369645	0	0	NA	NA	NA
X100139153_TGI_at	100139153_TGI_at	NM_001562	IL18	interleukin 18 (interferon-gamma-inducing factor)	2.26e-10	1.41575	0.295001	1.07915	0.344363	0.053766	1.24171	0.127699	0	0	NA	NA	NA
X100139176_TGI_at	100139176_TGI_at	NM_032340	C6orf125	chromosome 6 open reading frame 125	3.39e-10	1.36454	0.0448081	1.07868	0.0746725	0.0146433	1.21257	0.0514671	0	0	NA	NA	NA
X100139182_TGI_at	100139182_TGI_at	BQ225423			2.34e-11	2.25423	1.22e-05	2.18342	0.000305875	3.49e-05	2.49739	0.0018051	0	1	U4	U3	U1
X100139214_TGI_at	100139214_TGI_at	BX640727	KLHL8	kelch-like 8 (Drosophila)	9.15e-07	1.23283	0.172232	1.13218	0.218458	0.0153743	1.21528	0.0529599	0	0	NA	NA	NA
X100139230_TGI_at	100139230_TGI_at	NM_032160	DSEL	dermatan sulfate epimerase-like	2.48e-11	0.695424	0.00181504	0.80834	0.007499	0.637044	0.929179	0.747431	0	0	NA	NA	NA
X100139232_TGI_at	100139232_TGI_at	NM_000235	LIPA	lipase A, lysosomal acid, cholesterol esterase	1.17e-13	1.64291	0.000141387	1.2512	0.00128003	3.58e-05	1.44748	0.0018051	0	1	U3	U1	U1
X100139264_TGI_at	100139264_TGI_at	NM_017793	RPP25	ribonuclease P/MRP 25kDa subunit	4.64e-09	1.33371	0.180818	1.10169	0.228272	0.0349754	1.22094	0.0937039	0	0	NA	NA	NA
X100139295_TGI_at	100139295_TGI_at	NM_000895	LTA4H	leukotriene A4 hydrolase	3.32e-13	1.49458	0.000123142	1.26306	0.00118828	0.000612657	1.47097	0.00718034	0	1	U2	U2	U1
X100139314_TGI_at	100139314_TGI_at	NM_014312	VSIG2	V-set and immunoglobulin domain containing 2	3.43e-07	0.827578	0.301193	0.936238	0.350449	0.0113956	1.3403	0.0432519	0	0	NA	NA	NA
X100139356_TGI_at	100139356_TGI_at	NM_001097641	FUT3	fucosyltransferase 3 (galactoside 3(4)-L-fucosyltransferase, Lewis blood group)	3.97e-08	1.40322	0.811502	0.994543	0.829781	0.348497	1.10357	0.486869	0	0	NA	NA	NA
X100139367_TGI_at	100139367_TGI_at	M86553	CTSS	cathepsin S	1.56e-08	1.63068	0.136609	1.13769	0.180447	0.00325024	1.63943	0.0191159	0	0	NA	NA	NA
X100139388_TGI_at	100139388_TGI_at	H10348	HECW2	HECT, C2 and WW domain containing E3 ubiquitin protein ligase 2	1.21e-08	0.694473	0.0781847	0.833145	0.115644	0.87511	1.05544	0.925961	0	0	NA	NA	NA
X100139404_TGI_at	100139404_TGI_at	NM_001257	CDH13	cadherin 13, H-cadherin (heart)	4.36e-11	0.661842	0.0996073	0.907052	0.140129	0.023488	0.773534	0.0704859	0	0	NA	NA	NA
X100139417_TGI_at	100139417_TGI_at	BX417717	TIMP3	TIMP metallopeptidase inhibitor 3	4.74e-10	0.747955	0.113934	0.906174	0.155072	0.89726	1.0142	0.944438	0	0	NA	NA	NA
X100139433_TGI_at	100139433_TGI_at	BC096336	IDE	insulin-degrading enzyme	1.87e-07	1.24181	0.000934729	1.16332	0.0046456	0.203149	1.08219	0.330515	0	0	NA	NA	NA
X100139467_TGI_at	100139467_TGI_at	NM_016495	TBC1D7	TBC1 domain family, member 7	3.65e-09	1.28487	5.51e-05	1.21623	0.00072813	0.967011	0.974044	0.980395	0	0	NA	NA	NA
X100139477_TGI_at	100139477_TGI_at	NM_001079670	CAB39L	calcium binding protein 39-like	1.02e-07	0.7186	0.121289	0.893905	0.163494	0.348497	1.18214	0.486869	0	0	NA	NA	NA
X100139550_TGI_at	100139550_TGI_at	ENST00000340619	C6orf123	chromosome 6 open reading frame 123	5.18e-09	0.67446	0.0471774	0.830111	0.077856	0.146166	0.853152	0.26056	0	0	NA	NA	NA
X100139566_TGI_at	100139566_TGI_at	NM_001822	CHN1	chimerin (chimaerin) 1	3.67e-07	0.797334	0.71006	0.991688	0.735623	0.0335682	0.851764	0.0910692	0	0	NA	NA	NA
X100139568_TGI_at	100139568_TGI_at	NM_001042351	G6PD	glucose-6-phosphate dehydrogenase	3.32e-13	1.54707	0.0267824	1.11714	0.0506199	0.00020055	1.49	0.00415936	0	0	NA	NA	NA
X100139571_TGI_at	100139571_TGI_at	NM_001083963	TDRKH	tudor and KH domain containing	7.19e-08	1.34807	0.120573	1.09869	0.162665	0.103563	1.20946	0.203278	0	0	NA	NA	NA
X100139575_TGI_at	100139575_TGI_at	NM_003272	GPR137B	G protein-coupled receptor 137B	1.5e-12	1.4154	9.9e-06	1.22143	0.000268799	0.00128494	1.28002	0.0110437	0	1	U2	U2	U1
X100139578_TGI_at	100139578_TGI_at	BC025294	TLR4	toll-like receptor 4	1.36e-08	1.38286	0.486864	1.06559	0.52745	0.431725	1.07232	0.5691	0	0	NA	NA	NA
X100139580_TGI_at	100139580_TGI_at	AK096717	PTPRB	protein tyrosine phosphatase, receptor type, B	1.73e-07	0.72178	0.519432	0.941896	0.558043	0.647961	1.0788	0.755322	0	0	NA	NA	NA
X100139584_TGI_at	100139584_TGI_at	ENST00000382823		hypothetical protein LOC286161	9.63e-07	0.811028	0.350461	1.05114	0.397864	0.412093	0.953233	0.553027	0	0	NA	NA	NA
X100139595_TGI_at	100139595_TGI_at	NM_175709	CBX7	chromobox homolog 7	5.91e-11	0.759504	0.0832605	0.934033	0.122032	0.13782	0.888362	0.249969	0	0	NA	NA	NA
X100139604_TGI_at	100139604_TGI_at	AF329839	C1QTNF7	C1q and tumor necrosis factor related protein 7	8.09e-07	0.750749	0.596583	0.996124	0.631042	0.709599	0.974757	0.803598	0	0	NA	NA	NA
X100139609_TGI_at	100139609_TGI_at	DB304486	PPAP2B	phosphatidic acid phosphatase type 2B	7.92e-09	0.70286	0.055369	0.89428	0.0886068	0.512848	0.971554	0.646425	0	0	NA	NA	NA
X100139613_TGI_at	100139613_TGI_at	AL582126	PDK3	pyruvate dehydrogenase kinase, isozyme 3	1.02e-07	1.37474	0.131819	1.10656	0.175632	0.118794	1.15087	0.224033	0	0	NA	NA	NA
X100139662_TGI_at	100139662_TGI_at	NM_053067	UBQLN1	ubiquilin 1	2.48e-09	1.2202	0.0412999	1.0734	0.0701315	0.672959	1.04461	0.774063	0	0	NA	NA	NA
X100139699_TGI_at	100139699_TGI_at	NM_025214	CCDC68	coiled-coil domain containing 68	7.07e-09	0.69668	0.0765938	0.884072	0.113866	0.648925	1.01964	0.755322	0	0	NA	NA	NA
X100139703_TGI_at	100139703_TGI_at	AW976243	BACH2	BTB and CNC homology 1, basic leucine zipper transcription factor 2	2.39e-07	0.804828	0.000154792	0.851378	0.00135569	0.648925	0.955162	0.755322	0	0	NA	NA	NA
X100139723_TGI_at	100139723_TGI_at	ENST00000380934	NFIB	nuclear factor I/B	4.94e-07	0.831383	0.0858366	0.918974	0.125125	0.161066	0.898921	0.279095	0	0	NA	NA	NA
X100139749_TGI_at	100139749_TGI_at	NM_001098272	HMGCS1	3-hydroxy-3-methylglutaryl-Coenzyme A synthase 1 (soluble)	7.33e-07	1.33381	0.0252742	1.15103	0.0486024	0.00213176	1.43313	0.0149688	0	1	U2	U1	U1
X100139759_TGI_at	100139759_TGI_at	NM_002442	MSI1	musashi homolog 1 (Drosophila)	3.99e-08	0.756888	2.83e-06	0.759943	0.000115604	0.127687	0.880565	0.236568	0	0	NA	NA	NA
X100139778_TGI_at	100139778_TGI_at	NM_015464	SOSTDC1	sclerostin domain containing 1	6.79e-16	0.25381	0.000137043	0.52402	0.0012652	0.0268967	0.601231	0.0781678	0	0	NA	NA	NA
X100139780_TGI_at	100139780_TGI_at	NM_005854	RAMP2	receptor (G protein-coupled) activity modifying protein 2	7.56e-14	0.620694	0.0102008	0.832388	0.0249673	0.540514	0.959308	0.670622	0	0	NA	NA	NA
X100139794_TGI_at	100139794_TGI_at	NM_005891	ACAT2	acetyl-Coenzyme A acetyltransferase 2	3.15e-09	1.33609	0.00754444	1.21522	0.0201623	0.00112747	1.32349	0.0101221	0	1	U2	U1	U1
X100139796_TGI_at	100139796_TGI_at	AI148004	SPATA12	spermatogenesis associated 12	1.28e-09	1.37984	0.000979379	1.18038	0.00475382	0.724036	1.02756	0.815363	0	0	NA	NA	NA
X100139822_TGI_at	100139822_TGI_at	NM_153692	HTRA4	HtrA serine peptidase 4	5.06e-12	2.32701	1.36e-05	1.67416	0.000322623	0.000127227	1.81908	0.00362877	0	1	U2	U3	U1
X100139855_TGI_at	100139855_TGI_at	NM_153840	GPR110	G protein-coupled receptor 110	4.6e-17	3.23351	4.33e-07	1.86605	3.99e-05	0.0224365	1.59291	0.0684132	0	0	NA	NA	NA
X100139882_TGI_at	100139882_TGI_at	BX538036	C13orf31	chromosome 13 open reading frame 31	1.03e-10	1.38865	0.000243791	1.19998	0.00187527	0.0214252	1.18092	0.0663975	0	0	NA	NA	NA
X100139890_TGI_at	100139890_TGI_at	ENST00000379510	CNKSR2	connector enhancer of kinase suppressor of Ras 2	2.18e-08	0.738191	0.00382209	0.844515	0.0124809	0.147424	0.881844	0.262512	0	0	NA	NA	NA
X100139923_TGI_at	100139923_TGI_at	NM_152459	C16orf89	chromosome 16 open reading frame 89	1.04e-06	1.27853	0.70877	1.03074	0.734759	7.19e-06	1.80218	0.00115927	0	0	NA	NA	NA
X100139944_TGI_at	100139944_TGI_at	NM_005391	PDK3	pyruvate dehydrogenase kinase, isozyme 3	9.17e-08	1.24956	0.00808205	1.12032	0.0212294	0.0776894	1.10079	0.166153	0	0	NA	NA	NA
X100139952_TGI_at	100139952_TGI_at	NM_016569	TBX3	T-box 3	2.56e-11	0.69446	0.000595067	0.815047	0.00343095	0.0694323	0.875133	0.153169	0	0	NA	NA	NA
X100139953_TGI_at	100139953_TGI_at	NM_014584	ERO1L	ERO1-like (S. cerevisiae)	3.12e-10	1.27614	0.00851826	1.11469	0.0219987	0.0349426	1.12954	0.0937039	0	0	NA	NA	NA
X100139961_TGI_at	100139961_TGI_at	NM_018414	ST6GALNAC1	ST6 (alpha-N-acetyl-neuraminyl-2,3-beta-galactosyl-1,3)-N-acetylgalactosaminide alpha-2,6-sialyltransferase 1	1.4e-07	1.60355	0.583877	1.13328	0.618618	0.523607	0.855793	0.657672	0	0	NA	NA	NA
X100139963_TGI_at	100139963_TGI_at	BC063666	CREB3L2	cAMP responsive element binding protein 3-like 2	1.56e-11	1.5687	2.68e-06	1.26217	0.000115604	0.979396	0.998779	0.987557	0	0	NA	NA	NA
X100139989_TGI_at	100139989_TGI_at	NM_024656	GLT25D1	glycosyltransferase 25 domain containing 1	2.33e-10	1.46399	0.03597	1.09699	0.0631091	0.0126242	1.26468	0.0464474	0	0	NA	NA	NA
X100140003_TGI_at	100140003_TGI_at	BC028284	MARCKS	myristoylated alanine-rich protein kinase C substrate	5.68e-08	0.804646	0.190421	0.890028	0.238804	0.759495	0.995721	0.842345	0	0	NA	NA	NA
X100140015_TGI_at	100140015_TGI_at	NM_016113	TRPV2	transient receptor potential cation channel, subfamily V, member 2	3.95e-12	1.48032	0.000248471	1.23704	0.00188873	0.000558686	1.38561	0.00682063	0	1	U2	U2	U1
X100140048_TGI_at	100140048_TGI_at	NM_015656	KIF26A	kinesin family member 26A	7.58e-12	0.708253	0.00132849	0.817603	0.00592214	0.672949	0.953747	0.774063	0	0	NA	NA	NA
X100140068_TGI_at	100140068_TGI_at	BC015467	ZDHHC3	zinc finger, DHHC-type containing 3	2.63e-08	1.30215	0.239165	1.06304	0.287838	0.00139981	1.33742	0.0115092	0	0	NA	NA	NA
X100140071_TGI_at	100140071_TGI_at	NM_001431	EPB41L2	erythrocyte membrane protein band 4.1-like 2	1.41e-16	0.769038	0.0900536	0.946937	0.129921	0.0967262	0.920351	0.193392	0	0	NA	NA	NA
X100140088_TGI_at	100140088_TGI_at	NM_000310	PPT1	palmitoyl-protein thioesterase 1	1.3e-11	1.21842	0.0575926	1.0683	0.0912514	0.00514313	1.21295	0.0254238	0	0	NA	NA	NA
X100140111_TGI_at	100140111_TGI_at	NM_014175	MRPL15	mitochondrial ribosomal protein L15	4.22e-10	1.2178	0.150192	1.05553	0.194717	0.0545005	1.12271	0.128784	0	0	NA	NA	NA
X100140168_TGI_at	100140168_TGI_at	NM_005250	FOXL1	forkhead box L1	4.9e-07	0.78102	0.0751721	0.889393	0.11239	0.00930352	0.729996	0.0380041	0	0	NA	NA	NA
X100140172_TGI_at	100140172_TGI_at	NM_052970	HSPA12B	heat shock 70kD protein 12B	3.44e-09	0.69861	0.00077099	0.795467	0.00412774	0.334905	0.898136	0.476135	0	0	NA	NA	NA
X100140176_TGI_at	100140176_TGI_at	NM_019604	CRTAM	cytotoxic and regulatory T cell molecule	1.03e-14	2.01337	0.000194066	1.4642	0.00159156	0.000461729	1.62893	0.0060494	0	1	U5	U1	U1
X100140186_TGI_at	100140186_TGI_at	AK023947			9.61e-07	0.64441	0.000363033	0.725639	0.0024275	0.579048	0.965854	0.700553	0	0	NA	NA	NA
X100140196_TGI_at	100140196_TGI_at	NM_016428	ABI3	ABI family, member 3	1.85e-08	1.37664	0.00863378	1.14349	0.0222792	0.0365351	1.22305	0.0964394	0	0	NA	NA	NA
X100140216_TGI_at	100140216_TGI_at	NM_178588	PPP2R5C	protein phosphatase 2, regulatory subunit B'; gamma isoform	2.48e-10	1.2131	0.0167379	1.09597	0.0357496	0.0305083	1.10667	0.0860038	0	0	NA	NA	NA
X100140230_TGI_at	100140230_TGI_at	NM_004512	IL11RA	interleukin 11 receptor, alpha	6.46e-07	0.794238	0.0306347	0.907088	0.0559091	0.940656	0.964485	0.965521	0	0	NA	NA	NA
X100140231_TGI_at	100140231_TGI_at	NM_015157	PHLDB1	pleckstrin homology-like domain, family B, member 1	8.92e-10	0.724653	0.000207884	0.830291	0.00166674	0.167756	0.847968	0.288361	0	0	NA	NA	NA
X100140262_TGI_at	100140262_TGI_at	AW444868	IGSF2	immunoglobulin superfamily, member 2	7.04e-14	2.54576	4.16e-05	1.70046	0.000607007	0.000231241	2.08979	0.00443626	0	1	U1	U1	U1
X100140273_TGI_at	100140273_TGI_at	NM_000637	GSR	glutathione reductase	5.18e-07	1.2469	0.533348	1.00866	0.57147	0.154337	1.09673	0.270635	0	0	NA	NA	NA
X100140280_TGI_at	100140280_TGI_at	BQ000894	ASPH	aspartate beta-hydroxylase	3.44e-08	1.31479	0.0181402	1.12993	0.0377932	0.0133563	1.20007	0.0483136	0	1	U1	U1	U1
X100140285_TGI_at	100140285_TGI_at	ENST00000225573	PNPO	pyridoxamine 5';-phosphate oxidase	1.08e-07	1.22087	0.225582	1.05222	0.274637	0.0139424	1.22329	0.0496534	0	0	NA	NA	NA
X100140291_TGI_at	100140291_TGI_at	ENST00000380763	HCCS	holocytochrome c synthase (cytochrome c heme-lyase)	9.43e-11	1.32546	0.012614	1.07846	0.0290186	0.162754	1.09339	0.281113	0	0	NA	NA	NA
X100140293_TGI_at	100140293_TGI_at	NM_032048	EMILIN2	elastin microfibril interfacer 2	1.55e-12	1.47685	0.00500424	1.17492	0.0151301	0.00236704	1.34378	0.0160949	0	1	U5	U1	U1
X100140352_TGI_at	100140352_TGI_at	NM_002110	HCK	hemopoietic cell kinase	4.72e-09	1.40164	0.0733311	1.09593	0.110339	0.00824183	1.31709	0.0353707	0	0	NA	NA	NA
X100140370_TGI_at	100140370_TGI_at	NM_015030	FRYL	FRY-like	4.07e-10	0.787977	0.055369	0.947481	0.0886068	0.215347	0.959976	0.344449	0	0	NA	NA	NA
X100140384_TGI_at	100140384_TGI_at	M97347	GCNT1	glucosaminyl (N-acetyl) transferase 1, core 2 (beta-1,6-N-acetylglucosaminyltransferase)	2.79e-09	1.41384	0.00152055	1.17812	0.00657661	0.383282	1.07938	0.520942	0	0	NA	NA	NA
X100140407_TGI_at	100140407_TGI_at	AK023635		hypothetical protein LOC90246	6.87e-09	0.759721	0.00200034	0.808717	0.00798898	0.502203	1.11469	0.637495	0	0	NA	NA	NA
X100140424_TGI_at	100140424_TGI_at	NM_005130	FGFBP1	fibroblast growth factor binding protein 1	5.05e-10	2.51651	0.0299271	1.50211	0.0549828	0.248076	1.56644	0.381464	0	0	NA	NA	NA
X100140429_TGI_at	100140429_TGI_at	NM_147187	TNFRSF10B	tumor necrosis factor receptor superfamily, member 10b	7.23e-11	1.29795	0.0141437	1.10486	0.0314379	0.00979779	1.1429	0.039468	0	1	U3	U1	U1
X100140443_TGI_at	100140443_TGI_at	NM_001082618	CD33	CD33 molecule	2.71e-12	1.57357	0.0266599	1.13616	0.050455	0.0399015	1.26233	0.101662	0	0	NA	NA	NA
X100140451_TGI_at	100140451_TGI_at	AL137566	PGR	progesterone receptor	7.5e-07	0.747335	0.212834	0.921926	0.261919	0.810392	0.862688	0.881205	0	0	NA	NA	NA
X100140486_TGI_at	100140486_TGI_at	ENST00000312943	DOK3	docking protein 3	1.06e-10	1.57437	0.0749164	1.09603	0.112096	0.111833	1.12082	0.214036	0	0	NA	NA	NA
X100140507_TGI_at	100140507_TGI_at	NM_005792	MPHOSPH6	M-phase phosphoprotein 6	1.56e-12	1.368	0.00329904	1.1284	0.0112279	0.967011	1.02222	0.980395	0	0	NA	NA	NA
X100140555_TGI_at	100140555_TGI_at	CR749357	PIK3CB	phosphoinositide-3-kinase, catalytic, beta polypeptide	3.33e-14	1.25443	0.0370588	1.0496	0.0646672	0.221636	1.09216	0.351888	0	0	NA	NA	NA
X100140595_TGI_at	100140595_TGI_at	NM_019106	2011-09-03	septin 3	1.6e-07	1.92716	0.000217875	1.42221	0.00172912	0.0425198	1.36463	0.106896	0	0	NA	NA	NA
X100140613_TGI_at	100140613_TGI_at	BG336957	SLC16A3	solute carrier family 16, member 3 (monocarboxylic acid transporter 4)	3.97e-07	1.30116	0.0946092	1.09843	0.134566	0.0139424	1.24491	0.0496534	0	0	NA	NA	NA
X100140630_TGI_at	100140630_TGI_at	ENST00000253934	TMEM204	transmembrane protein 204	2.35e-08	0.687204	0.000181722	0.783133	0.00152524	0.299374	0.833018	0.437986	0	0	NA	NA	NA
X100140639_TGI_at	100140639_TGI_at	NM_002290	LAMA4	laminin, alpha 4	8.94e-07	0.829126	0.0100517	0.899839	0.0247302	0.711121	0.953688	0.803909	0	0	NA	NA	NA
X100140664_TGI_at	100140664_TGI_at	AF246665	BCL2L13	BCL2-like 13 (apoptosis facilitator)	1.32e-08	1.28891	0.0996073	1.09492	0.140129	0.0224365	1.148	0.0684132	0	0	NA	NA	NA
X100140677_TGI_at	100140677_TGI_at	NM_006441	MTHFS	5,10-methenyltetrahydrofolate synthetase (5-formyltetrahydrofolate cyclo-ligase)	9.16e-07	1.23084	0.0334984	1.09949	0.0594477	0.000188734	1.39528	0.00402842	0	0	NA	NA	NA
X100140678_TGI_at	100140678_TGI_at	NM_004935	CDK5	cyclin-dependent kinase 5	2.92e-11	1.40539	0.0417248	1.10271	0.0706297	0.00672124	1.25774	0.0304677	0	0	NA	NA	NA
X100140717_TGI_at	100140717_TGI_at	AK091010	GRB2	growth factor receptor-bound protein 2	4.68e-07	1.22066	0.0369864	1.11656	0.0645759	0.0268967	1.27335	0.0781678	0	0	NA	NA	NA
X100140738_TGI_at	100140738_TGI_at	NM_032024	C10orf11	chromosome 10 open reading frame 11	1.24e-13	1.40212	0.00329904	1.14743	0.0112279	0.0114202	1.22901	0.0432519	0	1	U6	U2	U1
X100140744_TGI_at	100140744_TGI_at	AK094937	C22orf9	chromosome 22 open reading frame 9	5.05e-10	1.37389	0.02179	1.11583	0.0435665	0.29165	1.06909	0.4302	0	0	NA	NA	NA
X100140806_TGI_at	100140806_TGI_at	NM_020686	ABAT	4-aminobutyrate aminotransferase	4.74e-13	1.49655	7.35e-05	1.26098	0.00086144	0.103563	1.18548	0.203278	0	0	NA	NA	NA
X100140829_TGI_at	100140829_TGI_at	NM_000169	GLA	galactosidase, alpha	1.53e-14	1.51922	0.000607765	1.19391	0.00348546	0.0114202	1.18798	0.0432519	0	1	U4	U2	U1
X100140843_TGI_at	100140843_TGI_at	AK091292	FAT4	FAT tumor suppressor homolog 4 (Drosophila)	3.95e-11	0.642173	0.038933	0.872672	0.0671022	0.191452	0.871659	0.318231	0	0	NA	NA	NA
X100140854_TGI_at	100140854_TGI_at	NM_130386	COLEC12	collectin sub-family member 12	8.93e-08	1.21378	0.0013732	1.18755	0.00611304	0.024581	1.2546	0.0729509	0	0	NA	NA	NA
X100140863_TGI_at	100140863_TGI_at	AF131817			1.04e-06	0.786337	0.0160545	0.888128	0.0346806	0.402347	0.876861	0.542113	0	0	NA	NA	NA
X100140872_TGI_at	100140872_TGI_at	NM_003026	SH3GL2	SH3-domain GRB2-like 2	5.18e-07	0.63972	0.0103863	0.682257	0.0252452	0.512848	1.14501	0.646425	0	0	NA	NA	NA
X100140893_TGI_at	100140893_TGI_at	BC008349	AHCYL2	S-adenosylhomocysteine hydrolase-like 2	3.25e-09	1.42693	0.0376934	1.17	0.0655617	0.00146193	1.40991	0.0118985	0	0	NA	NA	NA
X100140896_TGI_at	100140896_TGI_at	NM_022141	PARVG	parvin, gamma	2.06e-12	1.54605	0.000889677	1.20134	0.00448737	0.00344495	1.28702	0.0196615	0	1	U2	U1	U1
X100140899_TGI_at	100140899_TGI_at	NM_018934	PCDHB14	protocadherin beta 14	7.23e-08	0.771435	0.350461	0.934596	0.397864	0.00271917	0.768876	0.0172517	0	0	NA	NA	NA
X100140912_TGI_at	100140912_TGI_at	NM_014686	KIAA0355	KIAA0355	2.58e-11	0.801966	0.0862546	0.933041	0.125394	0.0633093	0.910074	0.144202	0	0	NA	NA	NA
X100140943_TGI_at	100140943_TGI_at	NM_002837	PTPRB	protein tyrosine phosphatase, receptor type, B	1.25e-08	0.714202	0.396129	0.919922	0.441925	0.440813	1.13892	0.578713	0	0	NA	NA	NA
X100140993_TGI_at	100140993_TGI_at	NM_152219	GJD3	gap junction protein, delta 3, 31.9kDa	1.75e-07	0.712649	0.0233569	0.852866	0.045707	0.721969	0.95508	0.813319	0	0	NA	NA	NA
X100141016_TGI_at	100141016_TGI_at	ENST00000375077	CORO2A	coronin, actin binding protein, 2A	1.82e-10	1.38285	0.0056156	1.14672	0.0162908	0.0146433	1.28169	0.0514671	0	0	NA	NA	NA
X100141048_TGI_at	100141048_TGI_at	ENST00000339788	DAB2	disabled homolog 2, mitogen-responsive phosphoprotein (Drosophila)	5.53e-08	1.27662	0.202504	1.06788	0.251404	0.00200392	1.32004	0.0146454	0	0	NA	NA	NA
X100141057_TGI_at	100141057_TGI_at	NM_144569	SPOCD1	SPOC domain containing 1	9.74e-13	2.01152	8.43e-06	1.58922	0.000251644	0.0390467	1.41928	0.101245	0	0	NA	NA	NA
X100141077_TGI_at	100141077_TGI_at	BI857441	GFPT1	glutamine-fructose-6-phosphate transaminase 1	5.18e-07	1.2404	0.0121483	1.15096	0.0282497	0.460794	1.0521	0.597401	0	0	NA	NA	NA
X100141079_TGI_at	100141079_TGI_at	NM_002396	ME2	malic enzyme 2, NAD(+)-dependent, mitochondrial	6.01e-07	1.24324	0.00112879	1.14649	0.00527258	0.0502336	1.12079	0.12164	0	0	NA	NA	NA
X100141185_TGI_at	100141185_TGI_at	AA489463	SLIT2	slit homolog 2 (Drosophila)	1.17e-09	0.709661	0.109391	0.885172	0.150284	0.673192	0.996425	0.774063	0	0	NA	NA	NA
X100141220_TGI_at	100141220_TGI_at	BC002682	DUSP3	dual specificity phosphatase 3	4.45e-08	1.20875	0.140775	1.05489	0.184663	0.00714438	1.21938	0.0318925	0	0	NA	NA	NA
X100141230_TGI_at	100141230_TGI_at	AW263638	PRKD1	protein kinase D1	3.77e-08	0.794848	0.0716379	0.889515	0.108654	0.466096	0.938308	0.603062	0	0	NA	NA	NA
X100141234_TGI_at	100141234_TGI_at	BC020494	BLOC1S2	biogenesis of lysosomal organelles complex-1, subunit 2	5.24e-11	1.26187	0.0105133	1.07068	0.0255154	0.00131177	1.14378	0.0111847	0	1	U3	U1	U1
X100141272_TGI_at	100141272_TGI_at	NM_006579	EBP	emopamil binding protein (sterol isomerase)	3.78e-08	1.2309	0.0149255	1.12395	0.032836	0.000647022	1.39887	0.00742119	0	1	U1	U1	U1
X100141275_TGI_at	100141275_TGI_at	NM_182487	OLFML2A	olfactomedin-like 2A	1.5e-08	0.645635	0.338871	0.967442	0.387298	0.269271	0.874972	0.405164	0	0	NA	NA	NA
X100141276_TGI_at	100141276_TGI_at	NM_004403	DFNA5	deafness, autosomal dominant 5	2.58e-10	1.56379	0.00119487	1.29265	0.00544707	0.862086	1.00701	0.916393	0	0	NA	NA	NA
X100141286_TGI_at	100141286_TGI_at	CA422831	TEP1	telomerase-associated protein 1	9.01e-10	1.37569	0.0324068	1.12769	0.058383	0.0414152	1.14704	0.104282	0	0	NA	NA	NA
X100141303_TGI_at	100141303_TGI_at	ENST00000372403	KCNMA1	potassium large conductance calcium-activated channel, subfamily M, alpha member 1	3.11e-08	1.53109	0.00505061	1.2671	0.0152274	0.862086	0.993628	0.916393	0	0	NA	NA	NA
X100141305_TGI_at	100141305_TGI_at	NM_004615	TSPAN7	tetraspanin 7	1.04e-09	0.795965	0.0333453	0.940045	0.0592459	0.711121	1.03732	0.803909	0	0	NA	NA	NA
X100141312_TGI_at	100141312_TGI_at	AB209094	GRIA1	glutamate receptor, ionotropic, AMPA 1	2.86e-11	0.596681	0.0364752	0.798529	0.0638217	0.215748	0.88934	0.344577	0	0	NA	NA	NA
X100141330_TGI_at	100141330_TGI_at	BC032453	SCFD2	sec1 family domain containing 2	6.92e-07	1.25536	0.0203912	1.11044	0.0414905	0.849099	0.989401	0.906475	0	0	NA	NA	NA
X100141332_TGI_at	100141332_TGI_at	NM_017988	SCYL2	SCY1-like 2 (S. cerevisiae)	1.88e-08	1.20356	0.153945	1.04861	0.198863	0.526346	0.981079	0.659403	0	0	NA	NA	NA
X100141342_TGI_at	100141342_TGI_at	NM_005397	PODXL	podocalyxin-like	6.35e-09	0.818272	0.0150656	0.897333	0.0329867	0.431008	0.919749	0.56862	0	0	NA	NA	NA
X100141362_TGI_at	100141362_TGI_at	NM_175898	C15orf37	chromosome 15 open reading frame 37	1.2e-08	1.39588	0.0100148	1.16618	0.0247302	0.00979779	1.38719	0.039468	0	1	U2	U1	U1
X100141376_TGI_at	100141376_TGI_at	NM_182797	PLCB4	phospholipase C, beta 4	3.34e-09	0.724339	0.0325982	0.854649	0.0584337	0.0335032	0.773407	0.0910461	0	0	NA	NA	NA
X100141378_TGI_at	100141378_TGI_at	NM_000532	PCCB	propionyl Coenzyme A carboxylase, beta polypeptide	7.58e-14	1.46586	0.00292393	1.12454	0.0102993	0.0313821	1.16836	0.0874953	0	0	NA	NA	NA
X100141389_TGI_at	100141389_TGI_at	AK075533	C1QTNF3	C1q and tumor necrosis factor related protein 3	8.71e-07	0.713214	0.472752	0.925257	0.514409	0.127027	0.833779	0.235834	0	0	NA	NA	NA
X100141502_TGI_at	100141502_TGI_at	NM_152331	ACOT4	acyl-CoA thioesterase 4	1.49e-12	1.8157	0.000101264	1.46649	0.00106306	0.000497032	1.64124	0.00635688	0	1	U2	U1	U1
X100141520_TGI_at	100141520_TGI_at	BC036848			4.34e-07	0.595057	0.0169985	0.744159	0.036091	0.823249	1.02896	0.889186	0	0	NA	NA	NA
X100141545_TGI_at	100141545_TGI_at	CB242128			8.49e-08	1.33915	0.00878018	1.19532	0.0224922	0.242831	1.1105	0.376272	0	0	NA	NA	NA
X100141556_TGI_at	100141556_TGI_at	NM_001040107	HVCN1	hydrogen voltage-gated channel 1	2.77e-14	1.72352	6.25e-05	1.33031	0.000783836	0.000656787	1.46909	0.00742745	0	1	U4	U1	U1
X100141623_TGI_at	100141623_TGI_at	NM_181844	BCL6B	B-cell CLL/lymphoma 6, member B (zinc finger protein)	4.65e-07	0.713966	0.202433	0.899642	0.251404	0.888166	1.00986	0.935477	0	0	NA	NA	NA
X100141627_TGI_at	100141627_TGI_at	NM_013322	SNX10	sorting nexin 10	1.11e-07	1.53745	0.0415174	1.15425	0.0704637	0.00486276	1.50887	0.0243743	0	0	NA	NA	NA
X100141663_TGI_at	100141663_TGI_at	X62852	GRB2	growth factor receptor-bound protein 2	1.85e-11	1.31741	0.00577483	1.14268	0.0165737	0.00410091	1.25179	0.0220655	0	1	U2	U1	U1
X100141669_TGI_at	100141669_TGI_at	NM_007191	WIF1	WNT inhibitory factor 1	1.06e-07	0.672238	0.00185243	0.798663	0.0075617	0.856524	1.13304	0.913191	0	0	NA	NA	NA
X100141684_TGI_at	100141684_TGI_at	NM_016543	SIGLEC7	sialic acid binding Ig-like lectin 7	1.81e-13	1.86379	2.52e-05	1.32658	0.000456611	2.95e-05	1.59804	0.0018051	0	1	U2	U1	U1
X100141702_TGI_at	100141702_TGI_at	BX648284	ITGA1	integrin, alpha 1	1.23e-13	0.704021	0.000158506	0.804891	0.00137329	0.374837	0.928238	0.511473	0	0	NA	NA	NA
X100141730_TGI_at	100141730_TGI_at	BU852892	IQGAP2	IQ motif containing GTPase activating protein 2	3.74e-09	1.31326	0.0046196	1.13393	0.0143026	0.0257168	1.1749	0.0754876	0	0	NA	NA	NA
X100141737_TGI_at	100141737_TGI_at	NM_031915	SETDB2	SET domain, bifurcated 2	2.51e-07	1.21214	0.0282528	1.09359	0.0526352	0.601955	1.01686	0.718556	0	0	NA	NA	NA
X100141747_TGI_at	100141747_TGI_at	NM_000887	ITGAX	integrin, alpha X (complement component 3 receptor 4 subunit)	8.07e-15	1.89961	0.000601103	1.29473	0.00345956	0.000558686	1.49578	0.00682063	0	1	U2	U1	U1
X100141781_TGI_at	100141781_TGI_at	DQ892977	ADFP	adipose differentiation-related protein	1.36e-09	1.39194	0.0962407	1.13584	0.136285	0.0153743	1.4014	0.0529599	0	0	NA	NA	NA
X100141783_TGI_at	100141783_TGI_at	NM_018689	KIAA1199	KIAA1199	3.27e-08	1.80503	0.0126105	1.37226	0.0290186	0.567747	1.05146	0.691814	0	0	NA	NA	NA
X100141812_TGI_at	100141812_TGI_at	NM_014600	EHD3	EH-domain containing 3	3.11e-08	0.729725	0.000517351	0.836796	0.00311387	0.0618953	0.849954	0.141481	0	0	NA	NA	NA
X100141820_TGI_at	100141820_TGI_at	ENST00000371481	GPR120	G protein-coupled receptor 120	1.69e-09	1.72281	0.00691965	1.43256	0.0189804	0.00710133	1.61303	0.0318925	0	1	U1	U1	U1
X100141827_TGI_at	100141827_TGI_at	NM_020826	SYT13	synaptotagmin XIII	3.64e-07	0.643711	5.8e-06	0.599977	0.000198818	0.0431702	0.70065	0.107775	0	0	NA	NA	NA
X100141831_TGI_at	100141831_TGI_at	AK074440			1.02e-11	1.67765	1.63e-05	1.41581	0.000349371	0.0177588	1.32444	0.0584046	0	0	NA	NA	NA
X100141854_TGI_at	100141854_TGI_at	H79011	ROD1	ROD1 regulator of differentiation 1 (S. pombe)	1.45e-09	1.31859	0.0539812	1.0836	0.086601	0.431008	0.955016	0.56862	0	0	NA	NA	NA
X100141864_TGI_at	100141864_TGI_at	NM_014441	SIGLEC9	sialic acid binding Ig-like lectin 9	2.41e-12	1.86472	0.000372231	1.30028	0.00247361	0.000159725	1.61492	0.00402842	0	1	U5	U1	U1
X100141897_TGI_at	100141897_TGI_at	NM_152574	TTC39B	tetratricopeptide repeat domain 39B	3.22e-12	1.82711	6.68e-05	1.33258	0.000812592	0.016931	1.38853	0.0564309	0	0	NA	NA	NA
X100141909_TGI_at	100141909_TGI_at	NM_005424	TIE1	tyrosine kinase with immunoglobulin-like and EGF-like domains 1	1.39e-09	0.713028	0.0100335	0.872455	0.0247302	0.54546	0.951986	0.674087	0	0	NA	NA	NA
X100141945_TGI_at	100141945_TGI_at	NM_001038603	MARVELD2	MARVEL domain containing 2	4.13e-07	0.78541	0.0324068	0.874322	0.058383	0.00980226	1.24109	0.039468	0	0	NA	NA	NA
X100141950_TGI_at	100141950_TGI_at	NM_018836	AJAP1	adherens junctions associated protein 1	1.23e-07	0.647409	0.0546924	0.865966	0.0876547	0.534478	0.910151	0.664336	0	0	NA	NA	NA
X100141979_TGI_at	100141979_TGI_at	NM_003683	RRP1	ribosomal RNA processing 1 homolog (S. cerevisiae)	2.24e-07	1.22401	0.600209	0.976046	0.634254	0.0668422	1.11031	0.148369	0	0	NA	NA	NA
X100141995_TGI_at	100141995_TGI_at	NM_000211	ITGB2	integrin, beta 2 (complement component 3 receptor 3 and 4 subunit)	8.39e-09	1.3863	0.00509311	1.18354	0.0153126	0.00465476	1.25103	0.0239271	0	1	U5	U1	U1
X100142003_TGI_at	100142003_TGI_at	NM_032038	SPNS1	spinster homolog 1 (Drosophila)	3.22e-12	1.39042	0.00823795	1.13014	0.0214987	0.00170304	1.35017	0.0131256	0	1	U2	U1	U1
X100142007_TGI_at	100142007_TGI_at	NM_213720	CHCHD10	coiled-coil-helix-coiled-coil-helix domain containing 10	4.07e-10	1.29986	0.00253271	1.1161	0.0092972	0.0186209	1.16043	0.0602562	0	0	NA	NA	NA
X100142017_TGI_at	100142017_TGI_at	AL832945		hypothetical protein LOC284262	3.8e-07	0.812109	0.287219	0.941598	0.336132	0.00930352	0.820809	0.0380041	0	0	NA	NA	NA
X100142018_TGI_at	100142018_TGI_at	NM_001400	S1PR1	sphingosine-1-phosphate receptor 1	6.57e-11	0.774855	0.00793404	0.904324	0.0209602	0.299374	0.918373	0.437986	0	0	NA	NA	NA
X100142022_TGI_at	100142022_TGI_at	NM_172037	RDH10	retinol dehydrogenase 10 (all-trans)	4.45e-08	1.40427	0.000576431	1.27106	0.00335264	0.421328	1.08849	0.560905	0	0	NA	NA	NA
X100142025_TGI_at	100142025_TGI_at	NM_006963	ZNF22	zinc finger protein 22 (KOX 15)	1.23e-07	0.82957	0.000137907	0.900883	0.0012652	0.374837	0.926665	0.511473	0	0	NA	NA	NA
X100142027_TGI_at	100142027_TGI_at	NM_004684	SPARCL1	SPARC-like 1 (hevin)	3.98e-11	0.769858	0.000808306	0.884893	0.00423659	0.0114202	0.872077	0.0432519	0	1	D1	D1	D1
X100142028_TGI_at	100142028_TGI_at	BC013166	TRIM44	tripartite motif-containing 44	1.16e-09	1.26284	9.19e-05	1.12707	0.00101059	0.529136	1.01435	0.660834	0	0	NA	NA	NA
X100142055_TGI_at	100142055_TGI_at	NM_021996	GBGT1	globoside alpha-1,3-N-acetylgalactosaminyltransferase 1	8.63e-12	1.56275	0.387467	1.02887	0.434066	0.016931	1.28269	0.0564309	0	0	NA	NA	NA
X100142058_TGI_at	100142058_TGI_at	BX097614			1.26e-06	0.63513	0.399296	0.839387	0.445305	0.00837977	0.650453	0.0357249	0	0	NA	NA	NA
X100142117_TGI_at	100142117_TGI_at	XM_001133772		hypothetical LOC731724	5.18e-07	1.28329	0.081915	1.10174	0.120334	0.00281249	1.24636	0.017739	0	0	NA	NA	NA
X100142135_TGI_at	100142135_TGI_at	NM_017882	CLN6	ceroid-lipofuscinosis, neuronal 6, late infantile, variant	1.61e-08	1.36662	0.214945	1.08424	0.263912	0.0120105	1.27413	0.0449123	0	0	NA	NA	NA
X100142157_TGI_at	100142157_TGI_at	NM_022072	NSUN3	NOL1/NOP2/Sun domain family, member 3	9.7e-10	1.23809	0.000454233	1.16433	0.00281391	0.980203	0.982225	0.987557	0	0	NA	NA	NA
X100142202_TGI_at	100142202_TGI_at	NM_001764	CD1B	CD1b molecule	3.44e-09	2.05273	0.0223379	1.42382	0.0444414	0.0252268	1.39008	0.0747297	0	0	NA	NA	NA
X100142212_TGI_at	100142212_TGI_at	NM_001013642	C1orf225	chromosome 1 open reading frame 225	6.21e-13	0.660013	5.93e-05	0.746097	0.000754915	0.284058	0.92805	0.421122	0	0	NA	NA	NA
X100142241_TGI_at	100142241_TGI_at	NM_030949	PPP1R14C	protein phosphatase 1, regulatory (inhibitor) subunit 14C	3.55e-07	1.3641	0.544942	1.0505	0.582537	0.209185	1.33596	0.337324	0	0	NA	NA	NA
X100142242_TGI_at	100142242_TGI_at	BC044884	KLHDC10	kelch domain containing 10	2.45e-07	1.20994	0.227763	1.0398	0.276582	0.248076	1.04925	0.381464	0	0	NA	NA	NA
X100142264_TGI_at	100142264_TGI_at	NM_022470	ZMAT3	zinc finger, matrin type 3	5.12e-07	1.37143	0.0200296	1.20498	0.0410136	0.0253196	1.31374	0.0748535	0	0	NA	NA	NA
X100142267_TGI_at	100142267_TGI_at	BC054028	CTSC	cathepsin C	1.08e-08	1.26082	0.997736	1.00581	0.997736	0.0776894	1.14349	0.166153	0	0	NA	NA	NA
X100142287_TGI_at	100142287_TGI_at	NM_205548	FAM151B	family with sequence similarity 151, member B	4.1e-07	1.33238	0.248805	1.06225	0.297661	0.70408	0.985288	0.801289	0	0	NA	NA	NA
X100142316_TGI_at	100142316_TGI_at	NM_004947	DOCK3	dedicator of cytokinesis 3	2.81e-12	2.01535	1.8e-05	1.60021	0.0003666	0.979398	1.02004	0.987557	0	0	NA	NA	NA
X100142391_TGI_at	100142391_TGI_at	BC111464	GNA12	guanine nucleotide binding protein (G protein) alpha 12	1.95e-08	1.35084	0.0708435	1.08857	0.107702	0.00387157	1.27262	0.0213588	0	0	NA	NA	NA
X100142421_TGI_at	100142421_TGI_at	NM_199166	ALAS1	aminolevulinate, delta-, synthase 1	9.96e-11	1.37484	0.000712771	1.17487	0.0039069	6.04e-05	1.4049	0.00234575	0	1	U1	U2	U1
X100142473_TGI_at	100142473_TGI_at	NM_024571	C16orf33	chromosome 16 open reading frame 33	4.02e-07	1.22428	0.81378	1.03286	0.83053	0.25501	1.08247	0.38934	0	0	NA	NA	NA
X100142478_TGI_at	100142478_TGI_at	U66563	LIFR	leukemia inhibitory factor receptor alpha	1.68e-08	0.738586	0.227927	0.885866	0.276582	0.33998	0.961145	0.480594	0	0	NA	NA	NA
X100142482_TGI_at	100142482_TGI_at	AK124571			2.86e-08	0.809253	0.0466545	0.931763	0.0771907	0.901253	0.979535	0.944937	0	0	NA	NA	NA
X100142497_TGI_at	100142497_TGI_at	AK129526			9.38e-07	1.20068	0.0205081	1.07971	0.0416494	0.313725	1.07098	0.454361	0	0	NA	NA	NA
X100142525_TGI_at	100142525_TGI_at	NM_003890	FCGBP	Fc fragment of IgG binding protein	1.7e-08	2.08306	0.107587	1.29447	0.14863	0.940656	0.994556	0.965521	0	0	NA	NA	NA
X100142526_TGI_at	100142526_TGI_at	BC001671	HDDC2	HD domain containing 2	4.33e-10	1.22127	0.0173704	1.07523	0.0365914	0.570118	1.04342	0.694441	0	0	NA	NA	NA
X100142537_TGI_at	100142537_TGI_at	ENST00000370399	TGFBR3	transforming growth factor, beta receptor III	1.14e-12	0.651914	4.58e-06	0.782686	0.000162666	0.836152	0.979086	0.898606	0	0	NA	NA	NA
X100142549_TGI_at	100142549_TGI_at	ENST00000379837	NUDT21	nudix (nucleoside diphosphate linked moiety X)-type motif 21	1.94e-11	1.36365	0.0407384	1.11009	0.069376	0.00166052	1.22669	0.0128961	0	0	NA	NA	NA
X100142552_TGI_at	100142552_TGI_at	NM_152793	C7orf41	chromosome 7 open reading frame 41	1.44e-11	0.764094	0.0129063	0.91224	0.0295224	0.348497	0.953918	0.486869	0	0	NA	NA	NA
X100142616_TGI_at	100142616_TGI_at	ENST00000370704	TTLL7	tubulin tyrosine ligase-like family, member 7	2.15e-11	0.648831	0.204592	0.896414	0.253616	0.772133	0.857339	0.852547	0	0	NA	NA	NA
X100142621_TGI_at	100142621_TGI_at	NM_152547	BTNL9	butyrophilin-like 9	6.76e-07	0.666723	0.00354119	0.770012	0.011815	0.418053	0.865401	0.560243	0	0	NA	NA	NA
X100142646_TGI_at	100142646_TGI_at	AF109362	SCD	stearoyl-CoA desaturase (delta-9-desaturase)	7.82e-09	1.35732	0.00451305	1.18733	0.0140537	0.00364383	1.6552	0.0205608	0	1	U1	U1	U1
X100142653_TGI_at	100142653_TGI_at	BX648950			2.25e-11	0.744121	0.0690579	0.930637	0.105535	0.797585	1.0251	0.871691	0	0	NA	NA	NA
X100142655_TGI_at	100142655_TGI_at	BC030115			5.31e-07	0.80555	0.47731	0.975323	0.519018	0.901253	1.02233	0.944937	0	0	NA	NA	NA
X100142710_TGI_at	100142710_TGI_at	BX105647			1.08e-07	1.51042	0.0411533	1.23371	0.0699931	0.0293938	1.34884	0.0835417	0	0	NA	NA	NA
X100142717_TGI_at	100142717_TGI_at	BC007541	UBASH3B	ubiquitin associated and SH3 domain containing, B	1.32e-10	1.70986	6.52e-05	1.55115	0.000805535	3.28e-05	2.00052	0.0018051	0	1	U2	U2	U1
X100142719_TGI_at	100142719_TGI_at	NM_001251	CD68	CD68 molecule	7.47e-11	1.84011	0.00402859	1.30797	0.0128683	0.000399716	1.75354	0.0056257	0	1	U2	U1	U1
X100142804_TGI_at	100142804_TGI_at	NM_003436	ZNF135	zinc finger protein 135	1.16e-08	0.744594	0.000437679	0.82259	0.00276055	0.10722	0.843625	0.208175	0	0	NA	NA	NA
X100142819_TGI_at	100142819_TGI_at	BC013304	SESN2	sestrin 2	5.77e-10	1.34292	0.0396416	1.07834	0.0679239	0.00240953	1.26758	0.0161454	0	0	NA	NA	NA
X100142834_TGI_at	100142834_TGI_at	NM_000358	TGFBI	transforming growth factor, beta-induced, 68kDa	3.68e-08	1.28473	0.0771144	1.11735	0.114395	0.274492	1.07624	0.411866	0	0	NA	NA	NA
X100142862_TGI_at	100142862_TGI_at	NM_016359	NUSAP1	nucleolar and spindle associated protein 1	2.15e-07	1.45719	0.163484	1.1798	0.208926	0.0365351	1.21693	0.0964394	0	0	NA	NA	NA
X100142874_TGI_at	100142874_TGI_at	BT019481	HUS1	HUS1 checkpoint homolog (S. pombe)	5.7e-12	1.28489	0.000541187	1.15898	0.00320633	0.0219647	1.15825	0.0675498	0	0	NA	NA	NA
X100142914_TGI_at	100142914_TGI_at	CA449365	EPB41L2	erythrocyte membrane protein band 4.1-like 2	7.13e-09	0.755546	0.620275	0.97958	0.653744	0.940656	0.959325	0.965521	0	0	NA	NA	NA
X100142922_TGI_at	100142922_TGI_at	NM_002294	LAMP2	lysosomal-associated membrane protein 2	4.39e-13	1.46505	9.71e-05	1.18437	0.00104982	0.00131177	1.32721	0.0111847	0	1	U2	U1	U1
X100142942_TGI_at	100142942_TGI_at	ENST00000381015	MPDZ	multiple PDZ domain protein	2.7e-08	0.790654	0.652972	0.980942	0.684622	0.266381	0.902496	0.403399	0	0	NA	NA	NA
X100142950_TGI_at	100142950_TGI_at	NM_020716	GRAMD1B	GRAM domain containing 1B	6.96e-07	1.33639	0.0116318	1.16334	0.0272773	0.0397198	1.16049	0.101662	0	0	NA	NA	NA
X100142961_TGI_at	100142961_TGI_at	BC040985			1.39e-08	0.696321	0.038968	0.848922	0.0671266	0.0726548	0.802281	0.158435	0	0	NA	NA	NA
X100143007_TGI_at	100143007_TGI_at	NM_153619	SEMA6D	sema domain, transmembrane domain (TM), and cytoplasmic domain, (semaphorin) 6D	1.3e-07	0.715844	0.124699	0.890973	0.16753	0.967011	0.960659	0.980395	0	0	NA	NA	NA
X100143016_TGI_at	100143016_TGI_at	NM_001077188	HS6ST2	heparan sulfate 6-O-sulfotransferase 2	1.48e-08	1.53654	0.0325982	1.32369	0.0584337	0.924556	0.987951	0.959351	0	0	NA	NA	NA
X100143051_TGI_at	100143051_TGI_at	ENST00000324868	YARS2	tyrosyl-tRNA synthetase 2, mitochondrial	1.18e-10	1.23726	0.00716168	1.1135	0.0194316	0.248076	1.0862	0.381464	0	0	NA	NA	NA
X100143058_TGI_at	100143058_TGI_at	NM_018593	SLC16A10	solute carrier family 16, member 10 (aromatic amino acid transporter)	2.45e-12	2.39268	5.25e-05	1.72687	0.000708252	0.016931	1.6504	0.0564309	0	0	NA	NA	NA
X100143066_TGI_at	100143066_TGI_at	NM_005905	SMAD9	SMAD family member 9	1.09e-06	0.797655	0.0968707	0.877234	0.136996	0.660414	0.955188	0.764285	0	0	NA	NA	NA
X100143074_TGI_at	100143074_TGI_at	NM_000129	F13A1	coagulation factor XIII, A1 polypeptide	2.97e-09	1.38435	0.0598931	1.22063	0.0941177	0.567747	1.06509	0.691814	0	0	NA	NA	NA
X100143094_TGI_at	100143094_TGI_at	NM_152996	ST6GALNAC3	ST6 (alpha-N-acetyl-neuraminyl-2,3-beta-galactosyl-1,3)-N-acetylgalactosaminide alpha-2,6-sialyltransferase 3	1.26e-06	0.689124	3.16e-05	0.707108	0.000509476	0.901253	1.01951	0.944937	0	0	NA	NA	NA
X100143106_TGI_at	100143106_TGI_at	NM_000961	PTGIS	prostaglandin I2 (prostacyclin) synthase	3.67e-07	0.759445	0.47978	0.926647	0.521352	0.613557	0.944518	0.72702	0	0	NA	NA	NA
X100143134_TGI_at	100143134_TGI_at	NM_014964	EPN2	epsin 2	1.9e-09	0.820945	0.000140883	0.88708	0.00127906	0.914366	1.01992	0.951874	0	0	NA	NA	NA
X100143173_TGI_at	100143173_TGI_at	NM_012232	PTRF	polymerase I and transcript release factor	9.49e-08	0.738285	0.00114732	0.865169	0.00533596	0.250102	1.12591	0.384396	0	0	NA	NA	NA
X100143178_TGI_at	100143178_TGI_at	NM_001003704		mitochondrial protein 18 kDa	2.18e-08	1.39746	0.749907	1.00273	0.771695	0.089895	1.2091	0.184145	0	0	NA	NA	NA
X100143185_TGI_at	100143185_TGI_at	BU681386			3.44e-09	0.729481	0.00780035	0.864469	0.0206918	0.100003	0.888585	0.198467	0	0	NA	NA	NA
X100143192_TGI_at	100143192_TGI_at	NM_001017373	SAMD3	sterile alpha motif domain containing 3	1.23e-06	0.723306	0.155625	0.967885	0.200632	0.672949	0.944555	0.774063	0	0	NA	NA	NA
X100143200_TGI_at	100143200_TGI_at	AK023508			3.28e-10	0.57166	0.000940185	0.675839	0.0046456	0.0307137	0.748283	0.0860038	0	0	NA	NA	NA
X100143217_TGI_at	100143217_TGI_at	AK127156		hypothetical LOC100131662	3.04e-07	0.76143	0.0148013	0.868778	0.0326296	0.567747	0.942687	0.691814	0	0	NA	NA	NA
X100143232_TGI_at	100143232_TGI_at	NM_020753	CASKIN2	CASK interacting protein 2	1.91e-07	0.703522	0.00178038	0.812894	0.00742325	0.29165	0.884316	0.4302	0	0	NA	NA	NA
X100143270_TGI_at	100143270_TGI_at	BU622650	BHLHB3	basic helix-loop-helix domain containing, class B, 3	3.68e-14	1.99852	7.53e-05	1.48781	0.000869522	0.00537347	1.40326	0.0261217	0	1	U4	U1	U1
X100143282_TGI_at	100143282_TGI_at	NM_182972	IRF2BP2	interferon regulatory factor 2 binding protein 2	4.85e-08	0.829605	0.40354	0.981903	0.44926	0.450742	0.953936	0.587204	0	0	NA	NA	NA
X100143316_TGI_at	100143316_TGI_at	NM_007267	TMC6	transmembrane channel-like 6	1.85e-09	1.32246	0.0430238	1.11095	0.0722594	0.0397198	1.25075	0.101662	0	0	NA	NA	NA
X100143321_TGI_at	100143321_TGI_at	AK055438			1.27e-07	0.825527	0.031491	0.902183	0.056988	0.197238	0.887223	0.324668	0	0	NA	NA	NA
X100143351_TGI_at	100143351_TGI_at	NM_172115	CAMK2D	calcium/calmodulin-dependent protein kinase (CaM kinase) II delta	1.47e-07	1.21882	0.572472	1.00449	0.607892	0.421843	1.02952	0.560905	0	0	NA	NA	NA
X100143376_TGI_at	100143376_TGI_at	NM_000175	GPI	glucose phosphate isomerase	8.27e-08	1.23892	0.45477	1.01125	0.497362	0.74692	1.04057	0.832984	0	0	NA	NA	NA
X100143411_TGI_at	100143411_TGI_at	BX537985	CCDC88A	coiled-coil domain containing 88A	1.73e-12	1.72865	3.82e-05	1.3808	0.000578519	0.00306378	1.41917	0.0185962	0	1	U2	U2	U1
X100143423_TGI_at	100143423_TGI_at	NM_006262	PRPH	peripherin	2.56e-09	0.633637	0.000501762	0.717212	0.00303567	0.287686	0.850139	0.426108	0	0	NA	NA	NA
X100143433_TGI_at	100143433_TGI_at	NM_145641	APOL3	apolipoprotein L, 3	5.78e-11	0.704344	6.84e-05	0.781284	0.000819872	0.534478	0.937735	0.664336	0	0	NA	NA	NA
X100143443_TGI_at	100143443_TGI_at	NM_007365	PADI2	peptidyl arginine deiminase, type II	2.08e-11	2.01724	0.0124102	1.28175	0.0286764	0.0508153	1.35999	0.122313	0	0	NA	NA	NA
X100143444_TGI_at	100143444_TGI_at	AF147343			2.13e-07	1.48302	0.424269	1.06024	0.469259	0.118794	1.35503	0.224033	0	0	NA	NA	NA
X100143470_TGI_at	100143470_TGI_at	NM_031911	C1QTNF7	C1q and tumor necrosis factor related protein 7	3.85e-09	0.64591	0.0536119	0.833958	0.0860942	0.39299	0.96476	0.532043	0	0	NA	NA	NA
X100143476_TGI_at	100143476_TGI_at	M63013	PON1	paraoxonase 1	4.09e-08	1.57142	1.16e-05	1.64508	0.000294785	0.00137087	1.47217	0.0113874	0	1	U6	U3	U1
X100143486_TGI_at	100143486_TGI_at	NM_130759	GIMAP1	GTPase, IMAP family member 1	8.93e-07	0.756147	0.0504575	0.887523	0.0821751	0.431008	1.10915	0.56862	0	0	NA	NA	NA
X100143570_TGI_at	100143570_TGI_at	NM_006639	CYSLTR1	cysteinyl leukotriene receptor 1	6.45e-10	1.40069	0.000682553	1.25076	0.00377984	0.00507625	1.45975	0.0252871	0	1	U1	U1	U1
X100143578_TGI_at	100143578_TGI_at	AA021440			8.88e-09	0.706202	0.232377	0.947561	0.281137	0.262075	0.833671	0.39749	0	0	NA	NA	NA
X100143617_TGI_at	100143617_TGI_at	ENST00000371581	IDE	insulin-degrading enzyme	7.63e-08	1.23203	0.00606354	1.06531	0.0171729	0.697304	0.970158	0.795826	0	0	NA	NA	NA
X100143658_TGI_at	100143658_TGI_at	NM_138410	CMTM7	CKLF-like MARVEL transmembrane domain containing 7	6.56e-12	1.44197	0.00045487	1.14624	0.00281391	0.0120105	1.17924	0.0449123	0	1	U5	U1	U1
X100143662_TGI_at	100143662_TGI_at	NM_025227	BPIL1	bactericidal/permeability-increasing protein-like 1	7.59e-08	1.56442	0.0117333	1.48004	0.027463	0.91089	0.575415	0.951874	0	0	NA	NA	NA
X100143667_TGI_at	100143667_TGI_at	NM_002300	LDHB	lactate dehydrogenase B	1.25e-10	1.21184	0.00668499	1.06622	0.0185419	0.0414152	1.11215	0.104282	0	0	NA	NA	NA
X100143673_TGI_at	100143673_TGI_at	NM_015296	DOCK9	dedicator of cytokinesis 9	6.81e-07	0.817397	0.0716379	0.924957	0.108654	0.980203	1.00556	0.987557	0	0	NA	NA	NA
X100143687_TGI_at	100143687_TGI_at	ENST00000307465	CDKL2	cyclin-dependent kinase-like 2 (CDC2-related kinase)	1.21e-07	1.25754	0.0385567	1.13853	0.0665248	0.000203903	1.32416	0.00415936	0	0	NA	NA	NA
X100143702_TGI_at	100143702_TGI_at	NM_002436	MPP1	membrane protein, palmitoylated 1, 55kDa	1.09e-09	1.29531	0.453408	1.02437	0.496208	0.0230441	1.15561	0.0699352	0	0	NA	NA	NA
X100143705_TGI_at	100143705_TGI_at	CA429926	LTBP1	latent transforming growth factor beta binding protein 1	5.15e-09	0.702971	0.380522	0.904752	0.427325	0.47417	0.882041	0.610567	0	0	NA	NA	NA
X100143736_TGI_at	100143736_TGI_at	NM_003661	APOL1	apolipoprotein L, 1	1.48e-07	0.831859	0.00030297	0.834453	0.00212817	0.14176	0.877654	0.255248	0	0	NA	NA	NA
X100143750_TGI_at	100143750_TGI_at	ENST00000361080	SLC44A1	solute carrier family 44, member 1	9.82e-12	0.784158	0.00880705	0.922334	0.0224922	0.118794	0.923724	0.224033	0	0	NA	NA	NA
X100143762_TGI_at	100143762_TGI_at	NM_022743	SMYD3	SET and MYND domain containing 3	3.07e-09	1.20262	0.0754736	1.07499	0.112564	0.114834	1.09579	0.218741	0	0	NA	NA	NA
X100143766_TGI_at	100143766_TGI_at	BC020624		hypothetical protein LOC641518	8.5e-07	0.777076	0.504583	0.962333	0.544085	0.0967075	0.879015	0.193392	0	0	NA	NA	NA
X100143776_TGI_at	100143776_TGI_at	NM_000632	ITGAM	integrin, alpha M (complement component 3 receptor 3 subunit)	5.22e-11	1.70526	0.00509311	1.24109	0.0153126	0.00264539	1.41368	0.0172244	0	1	U1	U1	U1
X100143779_TGI_at	100143779_TGI_at	NM_172197	AGER	advanced glycosylation end product-specific receptor	1.47e-14	0.790048	0.113871	0.928866	0.155072	0.334905	1.0755	0.476135	0	0	NA	NA	NA
X100143806_TGI_at	100143806_TGI_at	NM_021209	NLRC4	NLR family, CARD domain containing 4	1.84e-13	1.66454	0.00115614	1.29451	0.00533845	0.0043422	1.61014	0.0228675	0	1	U2	U1	U1
X100143809_TGI_at	100143809_TGI_at	NM_015717	CD207	CD207 molecule, langerin	1.14e-18	4.14151	2.11e-06	2.45794	0.000101523	0.0517518	1.60089	0.124289	0	0	NA	NA	NA
X100143810_TGI_at	100143810_TGI_at	AF070618			8.77e-11	0.819587	0.00925666	0.919001	0.0233262	0.685087	0.970399	0.784939	0	0	NA	NA	NA
X100143828_TGI_at	100143828_TGI_at	NM_003505	FZD1	frizzled homolog 1 (Drosophila)	1.17e-10	0.671293	0.117891	0.92584	0.159782	0.127936	0.858569	0.236568	0	0	NA	NA	NA
X100143838_TGI_at	100143838_TGI_at	NM_181716	PRR6	proline rich 6	5.44e-07	1.29612	0.00567345	1.12757	0.0163849	0.87511	1.00229	0.925961	0	0	NA	NA	NA
X100143851_TGI_at	100143851_TGI_at	CR749205	LIMCH1	LIM and calponin homology domains 1	5.36e-12	0.809549	0.379886	0.970658	0.427057	0.517878	0.981735	0.651746	0	0	NA	NA	NA
X100143865_TGI_at	100143865_TGI_at	AK027107			1.27e-13	1.74462	0.101523	1.14933	0.142327	0.000220177	1.56802	0.00427298	0	0	NA	NA	NA
X100143866_TGI_at	100143866_TGI_at	NM_024778	LONRF3	LON peptidase N-terminal domain and ring finger 3	2.83e-07	1.39507	0.0743865	1.14207	0.111407	0.00208139	1.54931	0.0149688	0	0	NA	NA	NA
X100143876_TGI_at	100143876_TGI_at	AK123774			1.65e-10	0.724306	0.049029	0.902435	0.0803357	0.451876	0.953171	0.588443	0	0	NA	NA	NA
X100143880_TGI_at	100143880_TGI_at	NM_198436	AURKA	aurora kinase A	2.72e-07	1.35841	0.30497	1.06453	0.354077	0.0189804	1.28092	0.0608694	0	0	NA	NA	NA
X100143890_TGI_at	100143890_TGI_at	BC060868	BMPER	BMP binding endothelial regulator	2.95e-07	0.720034	0.00396984	0.782711	0.0127438	0.523607	0.957085	0.657672	0	0	NA	NA	NA
X100143893_TGI_at	100143893_TGI_at	AF086027			7.15e-07	0.676346	3.68e-05	0.619568	0.00057068	0.55201	0.94357	0.680615	0	0	NA	NA	NA
X100143894_TGI_at	100143894_TGI_at	NM_053281	DACH2	dachshund homolog 2 (Drosophila)	9.56e-07	0.776363	0.00256371	0.867397	0.00937891	0.209181	0.915382	0.337324	0	0	NA	NA	NA
X100143910_TGI_at	100143910_TGI_at	NM_005595	NFIA	nuclear factor I/A	4.86e-09	0.827866	0.304854	0.958055	0.35407	0.504462	0.931961	0.639606	0	0	NA	NA	NA
X100143982_TGI_at	100143982_TGI_at	NM_016929	CLIC5	chloride intracellular channel 5	6.31e-11	0.745551	0.353767	0.923412	0.401193	0.529136	1.09687	0.660834	0	0	NA	NA	NA
X100143991_TGI_at	100143991_TGI_at	BC040549	CAMSAP1	calmodulin regulated spectrin-associated protein 1	1.2e-08	1.23805	0.191138	1.04334	0.239331	0.0307137	1.12014	0.0860038	0	0	NA	NA	NA
X100144018_TGI_at	100144018_TGI_at	NM_153046	TDRD9	tudor domain containing 9	4.7e-08	1.48013	0.014776	1.25481	0.0326185	0.0307137	1.26409	0.0860038	0	0	NA	NA	NA
X100144062_TGI_at	100144062_TGI_at	NM_000883	IMPDH1	IMP (inosine monophosphate) dehydrogenase 1	1.11e-06	1.21333	0.693227	0.9901	0.720787	0.672949	1.10506	0.774063	0	0	NA	NA	NA
X100144137_TGI_at	100144137_TGI_at	NM_001963	EGF	epidermal growth factor (beta-urogastrone)	6.89e-08	1.51236	0.00313343	1.37642	0.0108475	0.284058	1.14399	0.421122	0	0	NA	NA	NA
X100144166_TGI_at	100144166_TGI_at	AB017016	TPPP	tubulin polymerization promoting protein	1.9e-08	0.729781	0.00329904	0.816859	0.0112279	0.229011	1.25987	0.360578	0	0	NA	NA	NA
X100144174_TGI_at	100144174_TGI_at	AW794113	FDFT1	farnesyl-diphosphate farnesyltransferase 1	7.01e-07	1.25412	0.0715271	1.11047	0.108588	0.0932107	1.13977	0.188857	0	0	NA	NA	NA
X100144181_TGI_at	100144181_TGI_at	AK125283		hypothetical LOC255167	2.86e-08	0.640213	0.701625	1.03645	0.728994	0.020453	0.750715	0.0642494	0	0	NA	NA	NA
X100144185_TGI_at	100144185_TGI_at	NM_174918	C19orf59	chromosome 19 open reading frame 59	2.19e-10	1.63704	0.0465434	1.23519	0.0770464	0.000461729	2.21091	0.0060494	0	0	NA	NA	NA
X100144186_TGI_at	100144186_TGI_at	NM_001005339	RGS10	regulator of G-protein signaling 10	4.76e-11	1.29293	0.0256583	1.09951	0.0491216	0.0257168	1.1727	0.0754876	0	0	NA	NA	NA
X100144191_TGI_at	100144191_TGI_at	ENST00000372045	CHRDL1	chordin-like 1	3.68e-08	0.77883	0.212811	0.894483	0.261919	0.190948	0.890897	0.318231	0	0	NA	NA	NA
X100144196_TGI_at	100144196_TGI_at	NM_014275	MGAT4B	mannosyl (alpha-1,3-)-glycoprotein beta-1,4-N-acetylglucosaminyltransferase, isozyme B	6.01e-07	0.803179	0.000311326	0.886099	0.00217658	0.567747	0.971121	0.691814	0	0	NA	NA	NA
X100144202_TGI_at	100144202_TGI_at	AL136660	SPCS3	signal peptidase complex subunit 3 homolog (S. cerevisiae)	2.78e-08	1.30388	0.032962	1.09421	0.0588734	0.587187	1.03279	0.708272	0	0	NA	NA	NA
X100144215_TGI_at	100144215_TGI_at	NM_006019	TCIRG1	T-cell, immune regulator 1, ATPase, H+ transporting, lysosomal V0 subunit A3	1.48e-07	1.2505	0.776771	1.01478	0.796543	0.672949	1.07922	0.774063	0	0	NA	NA	NA
X100144219_TGI_at	100144219_TGI_at	NM_001025077	CUGBP2	CUG triplet repeat, RNA binding protein 2	6.55e-11	0.824682	0.234395	0.976944	0.283048	0.0146433	1.28014	0.0514671	0	0	NA	NA	NA
X100144242_TGI_at	100144242_TGI_at	NM_052954	CYYR1	cysteine/tyrosine-rich 1	6.34e-08	0.760936	0.00623701	0.869677	0.0175562	0.0305083	0.831482	0.0860038	0	0	NA	NA	NA
X100144255_TGI_at	100144255_TGI_at	AF131784			1.15e-07	1.48872	0.00106718	1.3025	0.0050212	0.228053	1.23336	0.35942	0	0	NA	NA	NA
X100144256_TGI_at	100144256_TGI_at	NM_020980	AQP9	aquaporin 9	1.56e-08	1.7654	0.523119	1.04819	0.56163	0.0658972	1.34141	0.147696	0	0	NA	NA	NA
X100144264_TGI_at	100144264_TGI_at	NM_153022	C12orf59	chromosome 12 open reading frame 59	3.05e-17	2.395	0.00474596	1.35106	0.014554	0.000188734	1.74471	0.00402842	0	1	U2	U1	U1
X100144268_TGI_at	100144268_TGI_at	AK124227			3.78e-08	0.748085	0.279577	0.964166	0.328381	0.0179719	0.793756	0.0588056	0	0	NA	NA	NA
X100144297_TGI_at	100144297_TGI_at	NM_015180	SYNE2	spectrin repeat containing, nuclear envelope 2	3.17e-15	0.722701	3.71e-05	0.831272	0.000572823	0.0138511	0.840507	0.0496534	0	1	D6	D1	D1
X100144305_TGI_at	100144305_TGI_at	ENST00000273695	TM4SF19	transmembrane 4 L six family member 19	1.25e-08	1.63875	0.217071	1.11637	0.26642	0.00372066	1.29383	0.0207592	0	0	NA	NA	NA
X100144312_TGI_at	100144312_TGI_at	Z48579	ADAM10	ADAM metallopeptidase domain 10	1.2e-10	1.35915	0.00152244	1.14467	0.00657661	0.0138511	1.23603	0.0496534	0	1	U2	U1	U1
X100144361_TGI_at	100144361_TGI_at	BC035683	PIK3CG	phosphoinositide-3-kinase, catalytic, gamma polypeptide	2.55e-09	1.42656	0.0743865	1.1546	0.111407	0.18498	1.2342	0.311549	0	0	NA	NA	NA
X100144372_TGI_at	100144372_TGI_at	NM_021992	TMSL8	thymosin-like 8	6.64e-17	0.238283	1.19e-09	0.351373	3.83e-07	0.000345371	0.399954	0.00530062	0	1	D6	D3	D1
X100144384_TGI_at	100144384_TGI_at	AL834241	NLN	neurolysin (metallopeptidase M3 family)	2.56e-08	1.39634	0.00181647	1.18622	0.007499	0.348497	1.09387	0.486869	0	0	NA	NA	NA
X100144415_TGI_at	100144415_TGI_at	AI050752	SGCB	sarcoglycan, beta (43kDa dystrophin-associated glycoprotein)	8.29e-07	0.783453	0.902873	0.977806	0.911927	0.338916	0.882174	0.480594	0	0	NA	NA	NA
X100144445_TGI_at	100144445_TGI_at	ENST00000257414	SEMA6A	sema domain, transmembrane domain (TM), and cytoplasmic domain, (semaphorin) 6A	1.73e-13	0.588042	0.0122128	0.798558	0.0283179	0.115879	0.814018	0.220212	0	0	NA	NA	NA
X100144489_TGI_at	100144489_TGI_at	NM_133168	OSCAR	osteoclast associated, immunoglobulin-like receptor	1.94e-13	1.88189	0.000502021	1.34042	0.00303567	0.000259767	1.84486	0.00460016	0	1	U2	U1	U1
X100144500_TGI_at	100144500_TGI_at	NM_006142	SFN	stratifin	6.77e-10	2.12454	0.000441341	1.52779	0.0027674	0.00240953	1.66572	0.0161454	0	1	U6	U3	U1
X100144528_TGI_at	100144528_TGI_at	NM_198568	GJB7	gap junction protein, beta 7, 25kDa	3.87e-07	0.70301	0.00273221	0.648972	0.00976265	0.00410091	0.70545	0.0220655	0	1	D5	D1	D1
X100144553_TGI_at	100144553_TGI_at	NM_020297	ABCC9	ATP-binding cassette, sub-family C (CFTR/MRP), member 9	3.29e-07	0.767836	0.423825	0.928777	0.469089	0.567747	0.965008	0.691814	0	0	NA	NA	NA
X100144556_TGI_at	100144556_TGI_at	AK026189		hypothetical locus LOC401237	7.34e-09	0.753969	0.0014786	0.823113	0.0064661	0.0967075	0.849995	0.193392	0	0	NA	NA	NA
X100144563_TGI_at	100144563_TGI_at	BC005850	RUNX1T1	runt-related transcription factor 1; translocated to, 1 (cyclin D-related)	1.17e-06	0.765872	0.0346129	0.890147	0.0610939	0.348497	0.884598	0.486869	0	0	NA	NA	NA
X100144575_TGI_at	100144575_TGI_at	NM_000491	C1QB	complement component 1, q subcomponent, B chain	7.43e-08	1.29203	0.0179227	1.14072	0.0373884	0.00195045	1.5121	0.0144513	0	1	U2	U1	U1
X100144578_TGI_at	100144578_TGI_at	AK055915	CDC42EP3	CDC42 effector protein (Rho GTPase binding) 3	2.69e-17	1.34975	0.000447122	1.13223	0.00279283	0.412325	1.03335	0.553027	0	0	NA	NA	NA
X100144607_TGI_at	100144607_TGI_at	NM_002926	RGS12	regulator of G-protein signaling 12	6.18e-12	1.56703	0.000266578	1.26652	0.00197968	0.0293938	1.2569	0.0835417	0	0	NA	NA	NA
X100144624_TGI_at	100144624_TGI_at	NM_032905	RBM17	RNA binding motif protein 17	1.25e-16	0.765152	2.08e-06	0.889286	0.000101523	0.0380823	0.915186	0.0995452	0	0	NA	NA	NA
X100144628_TGI_at	100144628_TGI_at	AK125979	KALRN	kalirin, RhoGEF kinase	9.05e-11	0.777663	0.0118262	0.865018	0.0275803	0.000703777	0.712444	0.00774154	0	1	D3	D1	D1
X100144634_TGI_at	100144634_TGI_at	NM_001017995	SH3PXD2B	SH3 and PX domains 2B	1.45e-07	1.42562	0.210734	1.07317	0.25968	0.228053	1.11023	0.35942	0	0	NA	NA	NA
X100144690_TGI_at	100144690_TGI_at	NM_007311	TSPO	translocator protein (18kDa)	3.22e-07	1.2661	0.214945	1.06959	0.263912	0.00120389	1.4206	0.0106305	0	0	NA	NA	NA
X100144749_TGI_at	100144749_TGI_at	BC035985	PGP	phosphoglycolate phosphatase	7.25e-08	1.25435	0.792533	1.01892	0.812188	0.140182	1.13828	0.252829	0	0	NA	NA	NA
X100144755_TGI_at	100144755_TGI_at	ENST00000373367	ZDHHC15	zinc finger, DHHC-type containing 15	7.9e-07	0.820322	0.0407384	0.942898	0.069376	0.836152	0.947675	0.898606	0	0	NA	NA	NA
X100144764_TGI_at	100144764_TGI_at	ENST00000370535	RP1-177G6.2	hypothetical protein LOC286411	1.69e-08	0.771104	0.000165838	0.816275	0.00141401	0.30723	0.882867	0.44644	0	0	NA	NA	NA
X100144778_TGI_at	100144778_TGI_at	NM_182566	VMO1	vitelline membrane outer layer 1 homolog (chicken)	1.67e-11	1.5175	0.0324678	1.15083	0.0584337	0.142562	1.17735	0.256261	0	0	NA	NA	NA
X100144806_TGI_at	100144806_TGI_at	NM_014184	CNIH4	cornichon homolog 4 (Drosophila)	4.12e-12	1.25904	0.001406	1.13589	0.0062076	0.00107356	1.24655	0.00977425	0	1	U7	U1	U1
X100144807_TGI_at	100144807_TGI_at	BM919267	LDB2	LIM domain binding 2	2.36e-12	0.664877	0.000194562	0.811648	0.00159156	0.832936	0.980029	0.897243	0	0	NA	NA	NA
X100144809_TGI_at	100144809_TGI_at	NM_001393	ECM2	extracellular matrix protein 2, female organ and adipocyte specific	2.64e-10	0.660103	0.0456575	0.862332	0.0760054	0.0381875	0.76271	0.0995779	0	0	NA	NA	NA
X100144851_TGI_at	100144851_TGI_at	NM_018256	WDR12	WD repeat domain 12	9.08e-09	1.26619	7.73e-05	1.15475	0.000883245	0.697304	0.994648	0.795826	0	0	NA	NA	NA
X100144865_TGI_at	100144865_TGI_at	BC040991			1.25e-09	0.796876	0.0327162	0.931875	0.0586128	0.131303	0.927777	0.240586	0	0	NA	NA	NA
X100144871_TGI_at	100144871_TGI_at	ENST00000374872	ARHGEF9	Cdc42 guanine nucleotide exchange factor (GEF) 9	4.76e-10	1.27742	0.00399887	1.12503	0.0128115	0.709599	1.02617	0.803598	0	0	NA	NA	NA
X100144891_TGI_at	100144891_TGI_at	NM_001234	CAV3	caveolin 3	3.83e-10	0.634878	9.17e-06	0.702257	0.000259388	0.502203	0.93416	0.637495	0	0	NA	NA	NA
X100144896_TGI_at	100144896_TGI_at	AB013805	CTNND2	catenin (cadherin-associated protein), delta 2 (neural plakophilin-related arm-repeat protein)	1.12e-11	0.51311	0.0996707	0.814845	0.140156	0.299374	1.17581	0.437986	0	0	NA	NA	NA
X100144914_TGI_at	100144914_TGI_at	NM_018488	TBX4	T-box 4	5.31e-07	0.751624	0.107587	0.879187	0.14863	0.759495	0.996881	0.842345	0	0	NA	NA	NA
X100145054_TGI_at	100145054_TGI_at	X69151	ATP6V1C1	ATPase, H+ transporting, lysosomal 42kDa, V1 subunit C1	8.88e-09	1.41063	0.0121763	1.14133	0.0282944	0.0775008	1.11734	0.166153	0	0	NA	NA	NA
X100145061_TGI_at	100145061_TGI_at	NM_178859		organic solute transporter beta	3.76e-10	0.655866	0.0264362	0.854343	0.0501627	0.526346	0.931155	0.659403	0	0	NA	NA	NA
X100145066_TGI_at	100145066_TGI_at	NM_014474	SMPDL3B	sphingomyelin phosphodiesterase, acid-like 3B	1.49e-09	1.51164	0.0733311	1.16496	0.110339	0.365342	1.1717	0.503363	0	0	NA	NA	NA
X100145117_TGI_at	100145117_TGI_at	CK821117	RNF145	ring finger protein 145	1.03e-10	1.40696	0.0479207	1.15653	0.07876	0.0515732	1.23945	0.123953	0	0	NA	NA	NA
X100145147_TGI_at	100145147_TGI_at	NM_025219	DNAJC5	DnaJ (Hsp40) homolog, subfamily C, member 5	1.36e-08	1.25039	0.296476	1.03033	0.345835	0.00824183	1.18682	0.0353707	0	0	NA	NA	NA
X100145172_TGI_at	100145172_TGI_at	NM_021199	SQRDL	sulfide quinone reductase-like (yeast)	4.7e-12	1.30859	0.0347966	1.08321	0.0613846	2.13e-05	1.29319	0.0017496	0	0	NA	NA	NA
X100145179_TGI_at	100145179_TGI_at	NM_015305	ANGEL1	angel homolog 1 (Drosophila)	7.48e-09	1.20802	6.68e-05	1.18027	0.000812592	0.000923705	1.22873	0.00896717	0	1	U1	U1	U1
X100145204_TGI_at	100145204_TGI_at	BC148409	GALNT12	UDP-N-acetyl-alpha-D-galactosamine:polypeptide N-acetylgalactosaminyltransferase 12 (GalNAc-T12)	5.75e-11	1.66731	1.9e-06	1.44674	9.71e-05	0.0335032	1.40287	0.0910461	0	0	NA	NA	NA
X100145227_TGI_at	100145227_TGI_at	NM_014251	SLC25A13	solute carrier family 25, member 13 (citrin)	9.07e-14	1.2859	0.0324068	1.05454	0.058383	0.780652	0.98529	0.859891	0	0	NA	NA	NA
X100145228_TGI_at	100145228_TGI_at	NM_013342	TFPT	TCF3 (E2A) fusion partner (in childhood Leukemia)	2.48e-10	1.35685	0.000272579	1.13867	0.00200576	0.0214252	1.21986	0.0663975	0	0	NA	NA	NA
X100145234_TGI_at	100145234_TGI_at	NM_052906	ELFN2	extracellular leucine-rich repeat and fibronectin type III domain containing 2	5.49e-09	1.54918	0.0103863	1.22156	0.0252452	0.15598	1.27056	0.273071	0	0	NA	NA	NA
X100145249_TGI_at	100145249_TGI_at	NM_004694	SLC16A6	solute carrier family 16, member 6 (monocarboxylic acid transporter 7)	5.05e-10	1.50227	0.000203273	1.51032	0.00164044	0.00574694	1.38043	0.0271988	0	1	U2	U2	U1
X100145254_TGI_at	100145254_TGI_at	NM_001103	ACTN2	actinin, alpha 2	1.14e-07	0.713801	0.357927	0.961688	0.405341	0.0897963	0.790539	0.184145	0	0	NA	NA	NA
X100145267_TGI_at	100145267_TGI_at	NM_006211	PENK	proenkephalin	8.53e-08	0.642964	0.00152427	0.723875	0.00657661	0.823249	0.917278	0.889186	0	0	NA	NA	NA
X100145309_TGI_at	100145309_TGI_at	AL832285	GBP5	guanylate binding protein 5	1.21e-08	0.578471	0.243449	0.880419	0.292012	0.940656	0.944222	0.965521	0	0	NA	NA	NA
X100145332_TGI_at	100145332_TGI_at	NM_015508	TIPARP	TCDD-inducible poly(ADP-ribose) polymerase	5.86e-07	1.50534	0.000803306	1.3072	0.00422358	0.440813	1.11083	0.578713	0	0	NA	NA	NA
X100145337_TGI_at	100145337_TGI_at	NM_005337	NCKAP1L	NCK-associated protein 1-like	3.41e-13	1.54301	0.00514105	1.18968	0.0154136	0.000695763	1.40231	0.007706	0	1	U6	U1	U1
X100145339_TGI_at	100145339_TGI_at	NM_003680	YARS	tyrosyl-tRNA synthetase	5.05e-10	1.23186	0.0407643	1.05664	0.069376	0.0668422	1.10776	0.148369	0	0	NA	NA	NA
X100145433_TGI_at	100145433_TGI_at	NM_018092	NETO2	neuropilin (NRP) and tolloid (TLL)-like 2	1.84e-07	0.697499	6.12e-06	0.69443	0.0002034	0.0293938	0.812242	0.0835417	0	0	NA	NA	NA
X100145440_TGI_at	100145440_TGI_at	AK130162	GPD1	glycerol-3-phosphate dehydrogenase 1 (soluble)	5.38e-13	1.91192	0.000697907	1.58259	0.00385163	0.00023763	2.13089	0.0044528	0	1	U2	U1	U1
X100145450_TGI_at	100145450_TGI_at	AL833633	DARS2	aspartyl-tRNA synthetase 2, mitochondrial	1.02e-07	1.21624	0.0116318	1.1031	0.0272773	0.0261978	1.11688	0.0766201	0	0	NA	NA	NA
X100145464_TGI_at	100145464_TGI_at	BX640843		similar to hCG2041270	5.52e-15	2.36551	1.1e-07	1.93383	1.54e-05	0.00746098	1.37426	0.0329407	0	1	U2	U2	U1
X100145469_TGI_at	100145469_TGI_at	NM_004751	GCNT3	glucosaminyl (N-acetyl) transferase 3, mucin type	1.27e-11	2.09507	0.00195511	1.39049	0.00790483	0.279854	1.01391	0.417965	0	0	NA	NA	NA
X100145480_TGI_at	100145480_TGI_at	DB317311	GIMAP1	GTPase, IMAP family member 1	1.24e-09	0.643508	0.00732075	0.782257	0.0197393	0.534478	1.08173	0.664336	0	0	NA	NA	NA
X100145538_TGI_at	100145538_TGI_at	NM_001080420	SHANK3	SH3 and multiple ankyrin repeat domains 3	3.98e-11	0.697877	5.73e-05	0.79153	0.000744162	0.491674	0.899317	0.62759	0	0	NA	NA	NA
X100145541_TGI_at	100145541_TGI_at	DA634014	TBXAS1	thromboxane A synthase 1 (platelet)	7.98e-10	1.44288	0.125472	1.17931	0.168499	0.0025466	1.58976	0.0167713	0	0	NA	NA	NA
X100145547_TGI_at	100145547_TGI_at	BU753528	PTPLA	protein tyrosine phosphatase-like (proline instead of catalytic arginine), member A	5.84e-08	1.3069	0.299538	1.09178	0.348775	0.365342	1.10712	0.503363	0	0	NA	NA	NA
X100145549_TGI_at	100145549_TGI_at	BC075849	SIRPA	signal-regulatory protein alpha	7.77e-13	1.49253	0.0215708	1.11305	0.0432624	0.000328732	1.30671	0.00519364	0	1	U1	U1	U1
X100145551_TGI_at	100145551_TGI_at	NM_006042	HS3ST3A1	heparan sulfate (glucosamine) 3-O-sulfotransferase 3A1	2.62e-07	0.693105	0.0227967	0.807749	0.0451313	0.00304516	0.692214	0.0185962	0	1	D2	D1	D1
X100145563_TGI_at	100145563_TGI_at	NM_000478	ALPL	alkaline phosphatase, liver/bone/kidney	2.71e-09	1.38656	0.112283	1.11653	0.153538	0.000135182	1.60337	0.00370146	0	0	NA	NA	NA
X100145575_TGI_at	100145575_TGI_at	NM_002848	PTPRO	protein tyrosine phosphatase, receptor type, O	2.77e-10	1.56277	0.000743319	1.34353	0.00404682	0.00344672	1.67805	0.0196615	0	1	U2	U1	U1
X100145578_TGI_at	100145578_TGI_at	AF147316			6.57e-11	0.621806	0.0138733	0.781982	0.0310006	0.951948	1.05903	0.974385	0	0	NA	NA	NA
X100145635_TGI_at	100145635_TGI_at	NM_019556	MOSPD1	motile sperm domain containing 1	4.18e-11	1.38839	0.000475034	1.18155	0.00290519	0.951953	0.969888	0.974385	0	0	NA	NA	NA
X100145649_TGI_at	100145649_TGI_at	NM_000924	PDE1B	phosphodiesterase 1B, calmodulin-dependent	1.26e-06	1.34083	0.243768	1.08403	0.292286	0.357146	1.07795	0.494451	0	0	NA	NA	NA
X100145658_TGI_at	100145658_TGI_at	NM_005488	TOM1	target of myb1 (chicken)	2.89e-07	1.24627	0.572622	1.0294	0.607892	0.0230441	1.18884	0.0699352	0	0	NA	NA	NA
X100145744_TGI_at	100145744_TGI_at	AF086222			6.35e-08	1.23888	0.560986	1.02907	0.596916	0.197238	1.11158	0.324668	0	0	NA	NA	NA
X100145749_TGI_at	100145749_TGI_at	BC001880	INSIG1	insulin induced gene 1	7.96e-13	1.51615	0.00161687	1.23766	0.00686584	0.00128494	1.41269	0.0110437	0	1	U4	U1	U1
X100145795_TGI_at	100145795_TGI_at	U07361	SORD	sorbitol dehydrogenase	7.7e-07	1.22835	0.395305	1.0628	0.441312	0.953827	0.962388	0.974385	0	0	NA	NA	NA
X100145868_TGI_at	100145868_TGI_at	AF007137			5.3e-09	0.57964	0.0780043	0.82912	0.115484	0.374837	0.835138	0.511473	0	0	NA	NA	NA
X100145896_TGI_at	100145896_TGI_at	NM_001025242	IRAK1	interleukin-1 receptor-associated kinase 1	3.97e-09	1.28278	0.0561782	1.04846	0.0896348	0.421328	1.06665	0.560905	0	0	NA	NA	NA
X100145904_TGI_at	100145904_TGI_at	DB370515	ADD2	adducin 2 (beta)	5.54e-07	0.79955	0.00282885	0.85556	0.00999713	0.242831	0.878514	0.376272	0	0	NA	NA	NA
X100145913_TGI_at	100145913_TGI_at	NM_016563	RASL12	RAS-like, family 12	1.22e-09	0.708089	0.00810092	0.845786	0.0212616	0.0668422	0.836934	0.148369	0	0	NA	NA	NA
X100145927_TGI_at	100145927_TGI_at	NM_001629	ALOX5AP	arachidonate 5-lipoxygenase-activating protein	3.07e-16	1.57088	0.00691965	1.16468	0.0189804	4.67e-05	1.54237	0.00206056	0	1	U2	U1	U1
X100145957_TGI_at	100145957_TGI_at	NM_203315	BDH1	3-hydroxybutyrate dehydrogenase, type 1	4.21e-08	1.41799	0.0178618	1.13359	0.0372853	0.0108553	1.21487	0.0419049	0	1	U1	U1	U1
X100145963_TGI_at	100145963_TGI_at	NM_000232	SGCB	sarcoglycan, beta (43kDa dystrophin-associated glycoprotein)	2.9e-10	0.766276	0.00478784	0.903823	0.0145853	0.103563	0.876186	0.203278	0	0	NA	NA	NA
X100145976_TGI_at	100145976_TGI_at	AL133642	EVL	Enah/Vasp-like	1.32e-09	1.49029	0.0114506	1.22099	0.0269775	0.122858	1.25686	0.22915	0	0	NA	NA	NA
X100145992_TGI_at	100145992_TGI_at	NM_000508	FGA	fibrinogen alpha chain	2.49e-08	1.81472	0.000277495	2.25038	0.00201858	0.0238896	1.59537	0.0714251	0	0	NA	NA	NA
X100145998_TGI_at	100145998_TGI_at	NM_080422	PTPN2	protein tyrosine phosphatase, non-receptor type 2	2.98e-10	1.22901	0.303879	1.04126	0.353065	0.0643304	1.11982	0.144788	0	0	NA	NA	NA
X100146019_TGI_at	100146019_TGI_at	NM_001042521		hypothetical protein MGC13057	1.18e-06	0.650276	0.11454	0.85609	0.155791	0.0307137	0.735458	0.0860038	0	0	NA	NA	NA
X100146023_TGI_at	100146023_TGI_at	U78165	RIT1	Ras-like without CAAX 1	2.64e-10	1.34572	0.00941102	1.11144	0.023513	0.0468646	1.19106	0.114688	0	0	NA	NA	NA
X100146061_TGI_at	100146061_TGI_at	NM_006949	STXBP2	syntaxin binding protein 2	1.2e-08	1.32347	0.758713	1.0159	0.779762	0.00737531	1.34496	0.0326969	0	0	NA	NA	NA
X100146063_TGI_at	100146063_TGI_at	NM_001040716	PC	pyruvate carboxylase	1.27e-12	1.55713	0.00305027	1.16806	0.0106512	0.0806094	1.18156	0.170587	0	0	NA	NA	NA
X100146074_TGI_at	100146074_TGI_at	NM_024872	DOK3	docking protein 3	7.96e-11	1.61911	0.17708	1.06911	0.224255	0.000753789	1.44702	0.00791355	0	0	NA	NA	NA
X100146078_TGI_at	100146078_TGI_at	BF921458			2.07e-07	0.750395	0.96152	0.996327	0.965414	0.0189804	0.80517	0.0608694	0	0	NA	NA	NA
X100146125_TGI_at	100146125_TGI_at	NM_025193	HSD3B7	hydroxy-delta-5-steroid dehydrogenase, 3 beta- and steroid delta-isomerase 7	1.13e-13	1.68858	0.00358413	1.24166	0.0119068	0.0049374	1.33402	0.0246335	0	1	U2	U1	U1
X100146153_TGI_at	100146153_TGI_at	BC032541	EML1	echinoderm microtubule associated protein like 1	1.33e-09	0.713473	0.00923276	0.881724	0.0233207	0.140182	0.816053	0.252829	0	0	NA	NA	NA
X100146203_TGI_at	100146203_TGI_at	NM_004113	FGF12	fibroblast growth factor 12	7.33e-07	0.684027	0.0172627	0.795373	0.0365316	0.0064123	0.72625	0.0292731	0	1	D1	D1	D1
X100146213_TGI_at	100146213_TGI_at	NM_005908	MANBA	mannosidase, beta A, lysosomal	2.39e-11	1.24486	4.18e-06	1.16817	0.00015806	0.0177588	1.15966	0.0584046	0	0	NA	NA	NA
X100146214_TGI_at	100146214_TGI_at	NM_007023	RAPGEF4	Rap guanine nucleotide exchange factor (GEF) 4	7.08e-08	0.676913	0.374895	0.935063	0.422182	0.759495	1.01017	0.842345	0	0	NA	NA	NA
X100146217_TGI_at	100146217_TGI_at	NM_021077	NMB	neuromedin B	8.74e-11	1.74315	0.0150374	1.22106	0.0329867	0.141436	1.20457	0.254806	0	0	NA	NA	NA
X100146264_TGI_at	100146264_TGI_at	NM_005472	KCNE3	potassium voltage-gated channel, Isk-related family, member 3	8.47e-10	1.44006	0.198476	1.08299	0.24708	0.228053	1.16822	0.35942	0	0	NA	NA	NA
X100146282_TGI_at	100146282_TGI_at	NM_032452	JPH4	junctophilin 4	4.65e-07	1.31582	0.00234444	1.18742	0.00880667	0.0108553	1.36818	0.0419049	0	1	U3	U1	U1
X100146308_TGI_at	100146308_TGI_at	ENST00000366558	KMO	kynurenine 3-monooxygenase (kynurenine 3-hydroxylase)	2.62e-16	2.27807	4.33e-06	1.56236	0.000158381	0.000149203	1.82931	0.00384705	0	1	U8	U2	U1
X100146335_TGI_at	100146335_TGI_at	AL575089	LAPTM5	lysosomal multispanning membrane protein 5	1.55e-14	1.5365	0.000419333	1.20836	0.00269225	0.00012425	1.45906	0.00362877	0	1	U6	U1	U1
X100146347_TGI_at	100146347_TGI_at	NM_000676	ADORA2B	adenosine A2b receptor	8.48e-11	1.45668	0.126098	1.09518	0.169128	0.0595355	1.18511	0.137946	0	0	NA	NA	NA
X100146372_TGI_at	100146372_TGI_at	NM_018181	ZNF532	zinc finger protein 532	1.9e-09	0.820828	0.0371643	0.938779	0.0648164	0.00737531	0.865079	0.0326969	0	0	NA	NA	NA
X100146464_TGI_at	100146464_TGI_at	AF131740	KCMF1	potassium channel modulatory factor 1	2.54e-07	0.812449	0.0780888	0.91854	0.115556	0.297619	0.89947	0.437986	0	0	NA	NA	NA
X100146480_TGI_at	100146480_TGI_at	BM923209	RERG	RAS-like, estrogen-regulated, growth inhibitor	1.2e-06	0.784028	0.765712	1.00268	0.786454	0.965667	1.03222	0.980395	0	0	NA	NA	NA
X100146488_TGI_at	100146488_TGI_at	BX111056			5.36e-12	0.596363	0.00532634	0.798563	0.0157494	0.284058	0.886569	0.421122	0	0	NA	NA	NA
X100146552_TGI_at	100146552_TGI_at	BM683298			4.45e-07	1.59452	0.139251	1.16062	0.183335	0.00256018	1.50658	0.0167713	0	0	NA	NA	NA
X100146578_TGI_at	100146578_TGI_at	NM_005896	IDH1	isocitrate dehydrogenase 1 (NADP+), soluble	5.27e-13	1.517	4e-05	1.22181	0.000593747	0.0365013	1.2606	0.0964394	0	0	NA	NA	NA
X100146669_TGI_at	100146669_TGI_at	NM_006332	IFI30	interferon, gamma-inducible protein 30	3e-12	1.29991	0.00442037	1.1333	0.0138453	0.00012425	1.33816	0.00362877	0	1	U2	U1	U1
X100146709_TGI_at	100146709_TGI_at	AW592486	FLT1	fms-related tyrosine kinase 1 (vascular endothelial growth factor/vascular permeability factor receptor)	1.34e-07	0.763451	0.000254038	0.760397	0.00191748	0.248076	0.893039	0.381464	0	0	NA	NA	NA
X100146716_TGI_at	100146716_TGI_at	R38526	LIFR	leukemia inhibitory factor receptor alpha	1.01e-06	0.624795	0.645826	0.961708	0.677791	0.709599	0.970746	0.803598	0	0	NA	NA	NA
X100146739_TGI_at	100146739_TGI_at	BC008299	C14orf139	chromosome 14 open reading frame 139	6.5e-11	0.715805	0.0100148	0.871561	0.0247302	0.74692	1.02771	0.832984	0	0	NA	NA	NA
X100146751_TGI_at	100146751_TGI_at	NM_001013659	ZNF793	zinc finger protein 793	7.92e-08	0.751054	0.00204223	0.813575	0.00809608	0.000987594	0.684883	0.00935714	0	1	D2	D1	D1
X100146758_TGI_at	100146758_TGI_at	NM_173623	TTLL6	tubulin tyrosine ligase-like family, member 6	7.15e-07	0.628476	0.000177562	0.590321	0.00149421	0.00607161	0.600549	0.0281566	0	1	D3	D2	D1
X100146767_TGI_at	100146767_TGI_at	BC050073	ACSL1	acyl-CoA synthetase long-chain family member 1	1.71e-10	1.55945	0.0155846	1.2512	0.0338527	0.0721025	1.31361	0.157337	0	0	NA	NA	NA
X100146785_TGI_at	100146785_TGI_at	NM_015481	ZNF385A	zinc finger protein 385A	2.14e-09	1.55393	0.0185596	1.14932	0.0385174	0.000753789	1.25617	0.00791355	0	1	U1	U1	U1
X100146794_TGI_at	100146794_TGI_at	BE463692			1.61e-07	0.7644	0.0384893	0.895148	0.0665248	0.122858	1.18447	0.22915	0	0	NA	NA	NA
X100146818_TGI_at	100146818_TGI_at	NM_178006	STARD13	StAR-related lipid transfer (START) domain containing 13	4.89e-11	0.788669	0.000765107	0.869179	0.00412365	0.470968	1.07325	0.606929	0	0	NA	NA	NA
X100146857_TGI_at	100146857_TGI_at	NM_021922	FANCE	Fanconi anemia, complementation group E	8.44e-11	1.29869	0.0849813	1.07208	0.124046	0.0748544	1.1369	0.161916	0	0	NA	NA	NA
X100146868_TGI_at	100146868_TGI_at	U33936	ADK	adenosine kinase	3.64e-09	1.28403	7.6e-05	1.17438	0.000874545	0.00271917	1.23049	0.0172517	0	1	U2	U2	U1
X100146870_TGI_at	100146870_TGI_at	NM_000691	ALDH3A1	aldehyde dehydrogenase 3 family, memberA1	7.11e-15	3.96251	9.89e-05	2.35232	0.00105371	0.127027	1.45055	0.235834	0	0	NA	NA	NA
X100146871_TGI_at	100146871_TGI_at	NM_016350	NIN	ninein (GSK3B interacting protein)	5.3e-09	1.55301	0.171909	1.09395	0.218135	0.491674	1.17234	0.62759	0	0	NA	NA	NA
X100146878_TGI_at	100146878_TGI_at	NM_207517	ADAMTSL3	ADAMTS-like 3	1.52e-13	0.636279	0.05989	0.867215	0.0941177	0.180248	0.859592	0.304954	0	0	NA	NA	NA
X100146903_TGI_at	100146903_TGI_at	NM_014178	STXBP6	syntaxin binding protein 6 (amisyn)	3.76e-10	0.652432	0.0034759	0.820547	0.0116696	0.601955	1.10457	0.718556	0	0	NA	NA	NA
X100146932_TGI_at	100146932_TGI_at	AV652595	HSDL2	hydroxysteroid dehydrogenase like 2	1.17e-06	1.22411	0.00385602	1.15042	0.0125282	0.00870747	1.3031	0.0369265	0	1	U1	U1	U1
X100146943_TGI_at	100146943_TGI_at	DB298383	CDKL2	cyclin-dependent kinase-like 2 (CDC2-related kinase)	8.2e-11	1.51155	0.0286637	1.18995	0.0531854	0.00125244	1.47037	0.0108804	0	0	NA	NA	NA
X100146956_TGI_at	100146956_TGI_at	AK093229			5.1e-08	1.52887	0.0187801	1.23974	0.0389499	0.0932107	1.21684	0.188857	0	0	NA	NA	NA
X100146961_TGI_at	100146961_TGI_at	NM_004265	FADS2	fatty acid desaturase 2	2.21e-07	1.30763	0.087317	1.09861	0.126653	0.016931	1.35127	0.0564309	0	0	NA	NA	NA
X100147004_TGI_at	100147004_TGI_at	NM_014945	ABLIM3	actin binding LIM protein family, member 3	3.12e-10	0.741976	0.0019621	0.851337	0.00790483	0.0439489	0.851357	0.10938	0	0	NA	NA	NA
X100147013_TGI_at	100147013_TGI_at	ENST00000346401	LILRB3	leukocyte immunoglobulin-like receptor, subfamily B (with TM and ITIM domains), member 3	2.37e-11	1.61469	0.0440785	1.14891	0.0737617	0.00870747	1.29824	0.0369265	0	0	NA	NA	NA
X100147056_TGI_at	100147056_TGI_at	NM_003047	SLC9A1	solute carrier family 9 (sodium/hydrogen exchanger), member 1	7.47e-11	1.32489	0.0082076	1.09736	0.0214543	0.0189804	1.16513	0.0608694	0	0	NA	NA	NA
X100147073_TGI_at	100147073_TGI_at	NM_005084	PLA2G7	phospholipase A2, group VII (platelet-activating factor acetylhydrolase, plasma)	3.82e-12	3.44691	0.000185772	1.56896	0.0015483	0.00213176	1.9797	0.0149688	0	1	U6	U1	U1
X100147096_TGI_at	100147096_TGI_at	BX361168	ATAD1	ATPase family, AAA domain containing 1	1.85e-08	1.23159	0.000945553	1.13209	0.0046456	0.0397198	1.15923	0.101662	0	0	NA	NA	NA
X100147102_TGI_at	100147102_TGI_at	NM_004370	COL12A1	collagen, type XII, alpha 1	7.04e-14	0.592812	0.0154866	0.857082	0.0337024	0.432377	0.941156	0.569494	0	0	NA	NA	NA
X100147111_TGI_at	100147111_TGI_at	AF200193	BACE1	beta-site APP-cleaving enzyme 1	4.33e-10	1.31291	0.0671758	1.0816	0.103447	0.0139424	1.21475	0.0496534	0	0	NA	NA	NA
X100147114_TGI_at	100147114_TGI_at	NM_032575	GLIS2	GLIS family zinc finger 2	3.47e-10	0.748327	4.54e-05	0.820431	0.000644465	0.185789	0.863599	0.311549	0	0	NA	NA	NA
X100147116_TGI_at	100147116_TGI_at	ENST00000358431	CTA-221G9.4	KIAA1671 protein	2.18e-07	0.833272	0.148097	0.9559	0.192467	0.164347	0.901216	0.282652	0	0	NA	NA	NA
X100147118_TGI_at	100147118_TGI_at	AK023271	LPCAT2	lysophosphatidylcholine acyltransferase 2	2.27e-13	1.73161	2.8e-05	1.31921	0.000479188	0.248076	1.15263	0.381464	0	0	NA	NA	NA
X100147140_TGI_at	100147140_TGI_at	NM_015689	DENND2A	DENN/MADD domain containing 2A	2.61e-08	0.712117	0.000153972	0.819315	0.00135569	0.980203	0.997669	0.987557	0	0	NA	NA	NA
X100147158_TGI_at	100147158_TGI_at	NM_004186	SEMA3F	sema domain, immunoglobulin domain (Ig), short basic domain, secreted, (semaphorin) 3F	5.82e-07	0.767658	2.79e-06	0.739681	0.000115604	0.393048	0.903763	0.532043	0	0	NA	NA	NA
X100147160_TGI_at	100147160_TGI_at	NM_016297	PCYOX1	prenylcysteine oxidase 1	8.09e-07	0.792296	0.70753	0.951769	0.73371	0.00325024	1.39232	0.0191159	0	0	NA	NA	NA
X100147167_TGI_at	100147167_TGI_at	NM_005258	GCHFR	GTP cyclohydrolase I feedback regulator	1.82e-10	1.76162	0.17158	1.16201	0.217889	0.00317515	1.77354	0.0191159	0	0	NA	NA	NA
X100147171_TGI_at	100147171_TGI_at	NM_016246	HSD17B14	hydroxysteroid (17-beta) dehydrogenase 14	1.51e-12	1.69434	0.000842704	1.22022	0.00435365	0.000806993	1.44016	0.00825695	0	1	U4	U2	U1
X100147179_TGI_at	100147179_TGI_at	NM_014921	LPHN1	latrophilin 1	1.53e-07	0.829398	0.027238	0.920906	0.0512182	0.512848	1.06001	0.646425	0	0	NA	NA	NA
X100147201_TGI_at	100147201_TGI_at	NM_002250	KCNN4	potassium intermediate/small conductance calcium-activated channel, subfamily N, member 4	1.42e-10	1.62255	0.0434798	1.14611	0.0729113	0.54546	1.04184	0.674087	0	0	NA	NA	NA
X100147215_TGI_at	100147215_TGI_at	NM_002208	ITGAE	integrin, alpha E (antigen CD103, human mucosal lymphocyte antigen 1; alpha polypeptide)	5.84e-14	1.60217	3.76e-08	1.29663	6.74e-06	0.00595432	1.25486	0.0280567	0	1	U1	U1	U1
X100147246_TGI_at	100147246_TGI_at	ENST00000256969	C12orf39	chromosome 12 open reading frame 39	7.33e-07	0.640974	0.583877	0.929691	0.618618	1	1.00644	1	0	0	NA	NA	NA
X100147293_TGI_at	100147293_TGI_at	ENST00000323944	STXBP6	syntaxin binding protein 6 (amisyn)	8.98e-12	0.605357	0.00923276	0.776335	0.0233207	0.74692	1.01818	0.832984	0	0	NA	NA	NA
X100147315_TGI_at	100147315_TGI_at	BC028609	CCDC93	coiled-coil domain containing 93	4.96e-08	1.33852	0.00728785	1.1241	0.0196888	0.0967262	1.10895	0.193392	0	0	NA	NA	NA
X100147317_TGI_at	100147317_TGI_at	BX111043			6.64e-07	0.813294	0.490064	0.987038	0.530381	0.241272	0.884738	0.374576	0	0	NA	NA	NA
X100147331_TGI_at	100147331_TGI_at	NM_013321	SNX8	sorting nexin 8	8.14e-10	1.43713	0.087598	1.07277	0.127003	0.00057123	1.27296	0.0068793	0	0	NA	NA	NA
X100147332_TGI_at	100147332_TGI_at	ENST00000263816	LRP2	low density lipoprotein-related protein 2	2.83e-09	1.77289	0.0363231	1.26948	0.0636938	0.000518747	1.98917	0.00658236	0	0	NA	NA	NA
X100147336_TGI_at	100147336_TGI_at	AK025665	PNPLA3	patatin-like phospholipase domain containing 3	7.5e-13	2.34252	2.57e-07	1.98227	2.77e-05	0.00112747	1.90282	0.0101221	0	1	U2	U2	U1
X100147362_TGI_at	100147362_TGI_at	AB002330		U2-associated SR140 protein	3.88e-09	0.808075	0.240918	0.96704	0.289623	0.267058	0.953138	0.403399	0	0	NA	NA	NA
X100147383_TGI_at	100147383_TGI_at	BI914249	ADFP	adipose differentiation-related protein	6.98e-10	1.51005	0.0946092	1.13885	0.134566	0.127027	1.23718	0.235834	0	0	NA	NA	NA
X100147393_TGI_at	100147393_TGI_at	BQ440490	CEP27	centrosomal protein 27kDa	1.08e-07	1.34501	0.174022	1.09157	0.220643	0.212464	1.16855	0.341532	0	0	NA	NA	NA
X100147438_TGI_at	100147438_TGI_at	NM_012294	RAPGEF5	Rap guanine nucleotide exchange factor (GEF) 5	1.11e-06	0.809465	0.335802	0.939575	0.384303	0.709599	1.00103	0.803598	0	0	NA	NA	NA
X100147440_TGI_at	100147440_TGI_at	NM_145753	PHLDB2	pleckstrin homology-like domain, family B, member 2	6.3e-07	0.769123	0.0672422	0.907355	0.103447	0.30723	0.895309	0.44644	0	0	NA	NA	NA
X100147493_TGI_at	100147493_TGI_at	NM_144584	C1orf59	chromosome 1 open reading frame 59	1.2e-06	1.23689	0.00124576	1.18324	0.00560767	0.0618953	1.17929	0.141481	0	0	NA	NA	NA
X100147504_TGI_at	100147504_TGI_at	AK023631			1.08e-07	0.686152	0.0282506	0.877633	0.0526352	0.32334	0.937182	0.462756	0	0	NA	NA	NA
X100147509_TGI_at	100147509_TGI_at	NM_025154	UNC84A	unc-84 homolog A (C. elegans)	1.05e-11	0.80412	0.128323	0.960662	0.171612	0.0153743	0.890106	0.0529599	0	0	NA	NA	NA
X100147607_TGI_at	100147607_TGI_at	AK056217			1.13e-10	0.719771	0.0407384	0.899575	0.069376	0.284058	0.858152	0.421122	0	0	NA	NA	NA
X100147647_TGI_at	100147647_TGI_at	NM_003811	TNFSF9	tumor necrosis factor (ligand) superfamily, member 9	1.78e-14	1.79866	4.61e-05	1.42592	0.000649405	0.00240953	1.41837	0.0161454	0	1	U4	U2	U1
X100147653_TGI_at	100147653_TGI_at	NM_012212	PTGR1	prostaglandin reductase 1	6.67e-09	1.23376	0.149327	1.08524	0.19383	0.967011	0.988333	0.980395	0	0	NA	NA	NA
X100147674_TGI_at	100147674_TGI_at	NM_002133	HMOX1	heme oxygenase (decycling) 1	1.04e-06	1.44931	0.145176	1.087	0.189127	0.0043422	1.64937	0.0228675	0	0	NA	NA	NA
X100147679_TGI_at	100147679_TGI_at	NM_018326	GIMAP4	GTPase, IMAP family member 4	3.77e-07	0.810705	0.031491	0.928789	0.056988	0.74692	1.03674	0.832984	0	0	NA	NA	NA
X100147680_TGI_at	100147680_TGI_at	AF086914	SRPRB	signal recognition particle receptor, B subunit	9.04e-11	1.3535	0.965011	0.982672	0.968316	0.257214	1.08043	0.391963	0	0	NA	NA	NA
X100147684_TGI_at	100147684_TGI_at	NM_012329	MMD	monocyte to macrophage differentiation-associated	3.49e-07	1.22176	0.000441341	1.14481	0.0027674	0.111833	1.0979	0.214036	0	0	NA	NA	NA
X100147699_TGI_at	100147699_TGI_at	NM_006097	MYL9	myosin, light chain 9, regulatory	3.8e-07	0.829385	0.0201092	0.888003	0.0410204	0.599184	1.03007	0.718556	0	0	NA	NA	NA
X100147707_TGI_at	100147707_TGI_at	NM_002980	SCTR	secretin receptor	1.68e-13	2.10144	3.18e-05	1.53752	0.000509476	1.09e-05	2.02842	0.0013063	0	1	U6	U2	U1
X100147740_TGI_at	100147740_TGI_at	NM_024556	FAM118B	family with sequence similarity 118, member B	9.57e-09	1.23996	0.0207516	1.08238	0.042038	0.000149203	1.34437	0.00384705	0	1	U2	U1	U1
X100147756_TGI_at	100147756_TGI_at	ENST00000354442	MBOAT2	membrane bound O-acyltransferase domain containing 2	5.15e-09	0.782193	0.317547	0.952147	0.366566	0.215347	0.91832	0.344449	0	0	NA	NA	NA
X100147776_TGI_at	100147776_TGI_at	BC032361	KIAA0040	KIAA0040	2.64e-10	0.741711	0.0108599	0.874647	0.0261166	0.209185	0.90038	0.337324	0	0	NA	NA	NA
X100147780_TGI_at	100147780_TGI_at	AF068836	CYTIP	cytohesin 1 interacting protein	5.78e-09	1.51439	0.00211542	1.2625	0.00829913	0.648925	1.04111	0.755322	0	0	NA	NA	NA
X100147804_TGI_at	100147804_TGI_at	NM_138418	C16orf14	chromosome 16 open reading frame 14	1.01e-09	1.27874	0.577463	1.02751	0.612426	0.0358125	1.20529	0.0957874	0	0	NA	NA	NA
X100147805_TGI_at	100147805_TGI_at	BC018929	PHLDA1	pleckstrin homology-like domain, family A, member 1	5.31e-07	1.66463	0.000401707	1.51786	0.00262086	0.967011	0.98887	0.980395	0	0	NA	NA	NA
X100147820_TGI_at	100147820_TGI_at	NM_000231	SGCG	sarcoglycan, gamma (35kDa dystrophin-associated glycoprotein)	3.43e-07	0.688333	0.938922	1.0152	0.944489	0.30723	1.26366	0.44644	0	0	NA	NA	NA
X100147825_TGI_at	100147825_TGI_at	ENST00000313038	LAIR1	leukocyte-associated immunoglobulin-like receptor 1	2.9e-11	1.61371	0.13624	1.10521	0.180034	0.00160065	1.34318	0.0126134	0	0	NA	NA	NA
X100147831_TGI_at	100147831_TGI_at	NM_014405	CACNG4	calcium channel, voltage-dependent, gamma subunit 4	6.85e-12	0.635291	0.0298728	0.774784	0.0549828	0.402347	1.14971	0.542113	0	0	NA	NA	NA
X100147839_TGI_at	100147839_TGI_at	NM_145792	MGST1	microsomal glutathione S-transferase 1	8.63e-09	1.38546	0.000156022	1.20243	0.00136276	0.00388342	1.32094	0.0213588	0	1	U2	U1	U1
X100147852_TGI_at	100147852_TGI_at	NM_030766	BCL2L14	BCL2-like 14 (apoptosis facilitator)	2.51e-08	1.43143	0.152975	1.0853	0.197769	0.685594	1.02317	0.784963	0	0	NA	NA	NA
X100147865_TGI_at	100147865_TGI_at	NM_001001995	GPM6B	glycoprotein M6B	6.48e-09	0.698855	0.0141308	0.83251	0.031431	0.159284	0.882943	0.276601	0	0	NA	NA	NA
X100147884_TGI_at	100147884_TGI_at	T90396			1.3e-11	0.622893	0.000277495	0.712203	0.00201858	0.672949	0.976325	0.774063	0	0	NA	NA	NA
X100147891_TGI_at	100147891_TGI_at	BC020784	ZC3HAV1L	zinc finger CCCH-type, antiviral 1-like	3.04e-08	0.711726	0.0655472	0.916207	0.101372	0.0281219	0.791897	0.0808537	0	0	NA	NA	NA
X100147909_TGI_at	100147909_TGI_at	NM_030583	MATN2	matrilin 2	2.13e-07	0.711038	0.0698522	0.849969	0.106597	0.140182	0.841429	0.252829	0	0	NA	NA	NA
X100147948_TGI_at	100147948_TGI_at	AK056836		hypothetical protein LOC150166	5.24e-08	1.49652	0.221372	1.10831	0.270566	0.00883112	1.44525	0.0369645	0	0	NA	NA	NA
X100147978_TGI_at	100147978_TGI_at	AF161529	COPZ1	coatomer protein complex, subunit zeta 1	4.93e-10	1.22461	0.00325065	1.09515	0.0111575	0.0572491	1.16401	0.133609	0	0	NA	NA	NA
X100148022_TGI_at	100148022_TGI_at	NM_174896	C1orf162	chromosome 1 open reading frame 162	8.07e-15	1.5279	0.000866119	1.18635	0.00444506	0.00323958	1.35871	0.0191159	0	1	U6	U1	U1
X100148030_TGI_at	100148030_TGI_at	NM_173728	ARHGEF15	Rho guanine nucleotide exchange factor (GEF) 15	1.84e-09	0.679082	0.0019978	0.761799	0.00798898	0.0832633	0.821482	0.17511	0	0	NA	NA	NA
X100148083_TGI_at	100148083_TGI_at	NM_001584	MPPED2	metallophosphoesterase domain containing 2	1.9e-08	0.622573	0.619439	0.959039	0.653289	0.00120389	0.55327	0.0106305	0	0	NA	NA	NA
X100148087_TGI_at	100148087_TGI_at	NM_004258	IGSF2	immunoglobulin superfamily, member 2	1.55e-15	2.40724	2.52e-05	1.67702	0.000456611	0.000289945	2.01615	0.0048727	0	1	U1	U1	U1
X100148116_TGI_at	100148116_TGI_at	NM_194250	ZNF804A	zinc finger protein 804A	1.17e-07	1.34172	0.00121933	1.24344	0.00551823	0.0932857	1.14511	0.188857	0	0	NA	NA	NA
X100148135_TGI_at	100148135_TGI_at	NM_002885	RAP1GAP	RAP1 GTPase activating protein	2.89e-07	1.2873	0.337349	1.08219	0.385695	0.00486276	1.55719	0.0243743	0	0	NA	NA	NA
X100148151_TGI_at	100148151_TGI_at	BC002660	TMOD1	tropomodulin 1	8e-09	0.742435	0.0164807	0.849707	0.0353174	0.315219	0.916341	0.454361	0	0	NA	NA	NA
X100148172_TGI_at	100148172_TGI_at	NM_020188	C16orf61	chromosome 16 open reading frame 61	1.51e-11	1.23598	0.00509311	1.11207	0.0153126	0.194183	1.04004	0.322272	0	0	NA	NA	NA
X100148175_TGI_at	100148175_TGI_at	NM_032229	SLITRK6	SLIT and NTRK-like family, member 6	1.31e-13	0.459715	0.000964889	0.557995	0.00471187	0.000188734	0.432933	0.00402842	0	1	D5	D1	D1
X100148181_TGI_at	100148181_TGI_at	NM_006511	RSC1A1	regulatory solute carrier protein, family 1, member 1	3.92e-07	1.25661	0.808675	1.02918	0.827153	0.0618953	1.0935	0.141481	0	0	NA	NA	NA
X100148193_TGI_at	100148193_TGI_at	NM_001018073	PCK2	phosphoenolpyruvate carboxykinase 2 (mitochondrial)	5.82e-07	1.32269	0.00449982	1.21092	0.0140396	0.000863569	1.51064	0.00867067	0	1	U1	U1	U1
X100148200_TGI_at	100148200_TGI_at	BQ014745	ATP2B4	ATPase, Ca++ transporting, plasma membrane 4	1.79e-11	0.79534	0.00064739	0.84541	0.00364779	0.55201	1.03563	0.680615	0	0	NA	NA	NA
X100148216_TGI_at	100148216_TGI_at	BC020257	NF2	neurofibromin 2 (merlin)	2.82e-07	1.27559	0.96152	0.999748	0.965414	0.203149	1.11839	0.330515	0	0	NA	NA	NA
X100148226_TGI_at	100148226_TGI_at	D85181	SC5DL	sterol-C5-desaturase (ERG3 delta-5-desaturase homolog, S. cerevisiae)-like	8.71e-07	1.25227	0.000289487	1.13102	0.00207223	0.0139424	1.18404	0.0496534	0	1	U2	U1	U1
X100148283_TGI_at	100148283_TGI_at	NM_006103	WFDC2	WAP four-disulfide core domain 2	4.82e-10	1.57248	0.26715	1.13725	0.316437	0.625254	0.934958	0.737896	0	0	NA	NA	NA
X100148302_TGI_at	100148302_TGI_at	BC063428	NCALD	neurocalcin delta	7.47e-11	0.763606	0.118561	0.926606	0.160488	0.967011	0.995173	0.980395	0	0	NA	NA	NA
X100148303_TGI_at	100148303_TGI_at	NM_000934	SERPINF2	serpin peptidase inhibitor, clade F (alpha-2 antiplasmin, pigment epithelium derived factor), member 2	1.01e-07	1.50134	0.0723898	1.17865	0.109485	0.0132706	1.35498	0.0481115	0	0	NA	NA	NA
X100148308_TGI_at	100148308_TGI_at	BI759100			1.18e-08	1.3766	0.0433454	1.16543	0.0727616	0.583057	1.1236	0.704874	0	0	NA	NA	NA
X100148313_TGI_at	100148313_TGI_at	BC000123	PDXK	pyridoxal (pyridoxine, vitamin B6) kinase	1.53e-11	1.42523	0.344635	1.0587	0.392217	0.00344672	1.28346	0.0196615	0	0	NA	NA	NA
X100148334_TGI_at	100148334_TGI_at	NM_005213	CSTA	cystatin A (stefin A)	3.18e-12	1.37608	0.111952	1.07825	0.15315	0.0328048	1.18998	0.0902133	0	0	NA	NA	NA
X100148366_TGI_at	100148366_TGI_at	NM_017909	RMND1	required for meiotic nuclear division 1 homolog (S. cerevisiae)	1.17e-06	1.20305	0.966045	0.992399	0.969051	0.100003	1.13954	0.198467	0	0	NA	NA	NA
X100148374_TGI_at	100148374_TGI_at	ENST00000264167	AGPS	alkylglycerone phosphate synthase	7.56e-14	1.57089	2.93e-05	1.28136	0.000491632	0.25976	1.07849	0.395282	0	0	NA	NA	NA
X100148388_TGI_at	100148388_TGI_at	BX103476			4.9e-08	0.780739	0.83591	0.998321	0.850422	0.74692	1.0647	0.832984	0	0	NA	NA	NA
X100148396_TGI_at	100148396_TGI_at	NM_003278	CLEC3B	C-type lectin domain family 3, member B	7.43e-11	0.695607	0.0216945	0.854747	0.0434564	0.0381875	1.43984	0.0995779	0	0	NA	NA	NA
X100148441_TGI_at	100148441_TGI_at	NM_022842	CDCP1	CUB domain containing protein 1	4.09e-13	1.66102	0.00200034	1.20191	0.00798898	0.0177588	1.26923	0.0584046	0	0	NA	NA	NA
X100148443_TGI_at	100148443_TGI_at	NM_021980	OPTN	optineurin	4.61e-10	0.734827	0.557133	0.970457	0.593403	0.238684	0.935855	0.372172	0	0	NA	NA	NA
X100148492_TGI_at	100148492_TGI_at	NM_001098416	HDAC7	histone deacetylase 7	3.27e-08	0.779219	0.00281656	0.888876	0.00997558	0.315219	0.952674	0.454361	0	0	NA	NA	NA
X100148503_TGI_at	100148503_TGI_at	BM716528			4.13e-07	1.39514	0.0444291	1.19671	0.0741943	0.590452	1.12322	0.709819	0	0	NA	NA	NA
X100148507_TGI_at	100148507_TGI_at	AL390971	PALMD	palmdelphin	3.11e-08	0.704746	0.128934	0.890024	0.172358	0.421328	0.922113	0.560905	0	0	NA	NA	NA
X100148531_TGI_at	100148531_TGI_at	AF035284	FADS1	fatty acid desaturase 1	2.36e-12	1.39149	0.4617	1.07217	0.504256	0.000239889	1.54351	0.00446914	0	0	NA	NA	NA
X100148546_TGI_at	100148546_TGI_at	NM_000845	GRM8	glutamate receptor, metabotropic 8	9.24e-12	0.516023	0.000126232	0.687965	0.00119661	0.0120119	0.759971	0.0449123	0	1	D6	D1	D1
X100148573_TGI_at	100148573_TGI_at	AK056696	ZNF606	zinc finger protein 606	6.96e-07	0.767453	0.648847	0.976355	0.68074	0.431008	0.925068	0.56862	0	0	NA	NA	NA
X100148607_TGI_at	100148607_TGI_at	ENST00000336173	PDE4C	phosphodiesterase 4C, cAMP-specific (phosphodiesterase E1 dunce homolog, Drosophila)	7.33e-07	1.50526	0.0230129	1.27737	0.0453642	0.00344672	1.60113	0.0196615	0	1	U1	U1	U2
X100148613_TGI_at	100148613_TGI_at	NM_173204	IL1F7	interleukin 1 family, member 7 (zeta)	2.81e-17	2.05346	1.1e-05	1.5365	0.000288889	0.0146433	1.35741	0.0514671	0	0	NA	NA	NA
X100148614_TGI_at	100148614_TGI_at	NM_016006	ABHD5	abhydrolase domain containing 5	2.9e-12	1.50445	0.00703973	1.17729	0.0191955	0.00402736	1.3947	0.0219631	0	1	U2	U1	U1
X100148669_TGI_at	100148669_TGI_at	NM_020365	EIF2B3	eukaryotic translation initiation factor 2B, subunit 3 gamma, 58kDa	3.92e-11	1.20504	0.255993	1.03704	0.304789	0.0139424	1.11273	0.0496534	0	0	NA	NA	NA
X100148685_TGI_at	100148685_TGI_at	NM_198477	CXCL17	chemokine (C-X-C motif) ligand 17	1.2e-10	1.2269	0.00348348	1.1371	0.0116829	0.0114202	1.34615	0.0432519	0	1	U4	U1	U1
X100148697_TGI_at	100148697_TGI_at	DQ893069	ABAT	4-aminobutyrate aminotransferase	1.03e-07	1.26782	0.000327237	1.147	0.00224401	0.312041	1.07194	0.452818	0	0	NA	NA	NA
X100148703_TGI_at	100148703_TGI_at	BC070102		hypothetical LOC729111	2.02e-09	0.753061	0.0221212	0.841346	0.0440919	0.185789	0.876213	0.311549	0	0	NA	NA	NA
X100148717_TGI_at	100148717_TGI_at	NM_001243	TNFRSF8	tumor necrosis factor receptor superfamily, member 8	1.88e-08	0.704822	0.000842903	0.828005	0.00435365	0.431008	0.875129	0.56862	0	0	NA	NA	NA
X100148733_TGI_at	100148733_TGI_at	NM_000452	SLC10A2	solute carrier family 10 (sodium/bile acid cotransporter family), member 2	1.05e-08	1.74217	0.000131652	1.89719	0.00122281	0.252599	1.06772	0.387495	0	0	NA	NA	NA
X100148735_TGI_at	100148735_TGI_at	NM_032293	GARNL3	GTPase activating Rap/RanGAP domain-like 3	5.1e-09	0.755692	0.0697596	0.913154	0.106506	0.0508153	0.830821	0.122313	0	0	NA	NA	NA
X100148773_TGI_at	100148773_TGI_at	AK125858			9.85e-09	0.665597	0.0301905	0.844832	0.055255	0.25501	0.849056	0.38934	0	0	NA	NA	NA
X100148778_TGI_at	100148778_TGI_at	ENST00000360514		hypothetical LOC339483	4.82e-08	0.742158	0.086531	0.908005	0.125739	0.599134	0.879299	0.718556	0	0	NA	NA	NA
X100148781_TGI_at	100148781_TGI_at	AK025590	KCTD15	potassium channel tetramerisation domain containing 15	8.08e-08	0.734345	0.0100335	0.866159	0.0247302	0.0431702	0.833789	0.107775	0	0	NA	NA	NA
X100148799_TGI_at	100148799_TGI_at	AK057653			8.26e-16	1.82253	2.58e-05	1.37249	0.000460173	0.110977	1.2028	0.212903	0	0	NA	NA	NA
X100148816_TGI_at	100148816_TGI_at	NM_000903	NQO1	NAD(P)H dehydrogenase, quinone 1	1.17e-17	1.90837	3.19e-05	1.40587	0.000509476	0.00486276	1.25142	0.0243743	0	1	U2	U1	U1
X100148821_TGI_at	100148821_TGI_at	BC039741	TMEM106B	transmembrane protein 106B	4.64e-07	1.21731	0.0614634	1.06947	0.0960874	0.993269	0.97792	0.995253	0	0	NA	NA	NA
X100148822_TGI_at	100148822_TGI_at	NM_004557	NOTCH4	Notch homolog 4 (Drosophila)	6.35e-09	0.715025	0.00602331	0.82174	0.017089	0.315219	0.904622	0.454361	0	0	NA	NA	NA
X100148867_TGI_at	100148867_TGI_at	NM_138570	SLC38A10	solute carrier family 38, member 10	2.75e-07	1.34841	0.497712	1.02533	0.537396	0.168116	1.10518	0.288673	0	0	NA	NA	NA
X100148868_TGI_at	100148868_TGI_at	BX437624	GALNT2	UDP-N-acetyl-alpha-D-galactosamine:polypeptide N-acetylgalactosaminyltransferase 2 (GalNAc-T2)	2.49e-08	1.31078	0.274596	1.03206	0.32371	0.0219647	1.17418	0.0675498	0	0	NA	NA	NA
X100148899_TGI_at	100148899_TGI_at	CN358662		hypothetical protein DKFZp434H1419	2.18e-07	0.767957	0.462317	0.951589	0.504588	0.491674	1.05357	0.62759	0	0	NA	NA	NA
X100148902_TGI_at	100148902_TGI_at	CR936609			2.12e-08	0.618345	0.0330626	0.879953	0.0588734	0.0643304	0.858139	0.144788	0	0	NA	NA	NA
X100148916_TGI_at	100148916_TGI_at	NM_198336	INSIG1	insulin induced gene 1	9.86e-07	1.21012	0.0116983	1.08412	0.0274008	0.0180658	1.1996	0.0588142	0	0	NA	NA	NA
X100148920_TGI_at	100148920_TGI_at	BC018104	RNF141	ring finger protein 141	6.79e-11	1.30477	0.11325	1.09089	0.154336	0.151014	1.13817	0.266548	0	0	NA	NA	NA
X100148927_TGI_at	100148927_TGI_at	NM_005139	ANXA3	annexin A3	8.56e-08	0.745124	0.328767	0.903352	0.376819	0.305603	1.171	0.445682	0	0	NA	NA	NA
X100148934_TGI_at	100148934_TGI_at	NM_022127	SLC28A3	solute carrier family 28 (sodium-coupled nucleoside transporter), member 3	3.16e-11	1.49909	2.09e-08	1.54229	4.82e-06	0.849099	0.999067	0.906475	0	0	NA	NA	NA
X100148935_TGI_at	100148935_TGI_at	NM_004311	ARL3	ADP-ribosylation factor-like 3	6.89e-08	0.787506	0.0226732	0.902595	0.0449973	0.315219	0.933381	0.454361	0	0	NA	NA	NA
X100148954_TGI_at	100148954_TGI_at	NM_021626	SCPEP1	serine carboxypeptidase 1	1.62e-09	1.3845	2.05e-05	1.19229	0.000394874	0.0832633	1.17004	0.17511	0	0	NA	NA	NA
X100148958_TGI_at	100148958_TGI_at	AK056155			1.57e-07	1.23267	0.0247783	1.12669	0.0477921	0.00240953	1.40833	0.0161454	0	1	U1	U1	U1
X100148986_TGI_at	100148986_TGI_at	NM_182915	STEAP3	STEAP family member 3	1.79e-10	1.5344	0.421271	1.05496	0.466744	0.241272	1.09126	0.374576	0	0	NA	NA	NA
X100149015_TGI_at	100149015_TGI_at	AK226075	SEH1L	SEH1-like (S. cerevisiae)	1e-07	1.27175	0.0688894	1.11966	0.105478	0.0694323	1.187	0.153169	0	0	NA	NA	NA
X100149017_TGI_at	100149017_TGI_at	CR740475			9.44e-08	1.83755	0.29323	1.10524	0.342544	0.100003	1.32367	0.198467	0	0	NA	NA	NA
X100149024_TGI_at	100149024_TGI_at	BC037213			2.42e-07	0.780795	0.344635	0.927423	0.392217	0.421328	0.917022	0.560905	0	0	NA	NA	NA
X100149027_TGI_at	100149027_TGI_at	NM_030773	TUBB1	tubulin, beta 1	4.92e-07	0.587192	0.516264	0.910873	0.555009	0.685087	0.821824	0.784939	0	0	NA	NA	NA
X100149031_TGI_at	100149031_TGI_at	AJ224117	RNASEH1	ribonuclease H1	1.46e-11	1.26752	0.0070728	1.11256	0.0192458	0.0132706	1.1625	0.0481115	0	1	U2	U1	U1
X100149043_TGI_at	100149043_TGI_at	NM_014603	CDR2L	cerebellar degeneration-related protein 2-like	7.68e-08	0.800241	0.00466259	0.843471	0.0143392	0.587187	0.960751	0.708272	0	0	NA	NA	NA
X100149044_TGI_at	100149044_TGI_at	NM_001099691	TGFA	transforming growth factor, alpha	2.8e-09	1.25354	0.0213577	1.09286	0.0429239	0.534478	1.05923	0.664336	0	0	NA	NA	NA
X100149087_TGI_at	100149087_TGI_at	AL133090	ADAM22	ADAM metallopeptidase domain 22	2.63e-08	0.68569	0.00476519	0.798535	0.0145713	0.122858	0.826738	0.22915	0	0	NA	NA	NA
X100149119_TGI_at	100149119_TGI_at	NM_001040274	SYCP2L	synaptonemal complex protein 2-like	7.27e-09	0.6311	0.0859833	0.84804	0.125169	0.567747	0.945121	0.691814	0	0	NA	NA	NA
X100149122_TGI_at	100149122_TGI_at	BC007333	ETV5	ets variant 5	6.46e-07	0.70349	0.603517	0.914295	0.637331	0.953827	1.13713	0.974385	0	0	NA	NA	NA
X100149136_TGI_at	100149136_TGI_at	ENST00000339360	RAP1GDS1	RAP1, GTP-GDP dissociation stimulator 1	9.9e-08	1.21202	0.142565	1.04725	0.18648	0.0775008	1.10752	0.166153	0	0	NA	NA	NA
X100149140_TGI_at	100149140_TGI_at	NM_173626	SLC26A11	solute carrier family 26, member 11	1.03e-10	1.38578	0.000313011	1.18628	0.00218362	0.0120105	1.18342	0.0449123	0	1	U2	U1	U1
X100149156_TGI_at	100149156_TGI_at	NM_001801	CDO1	cysteine dioxygenase, type I	2.65e-14	0.601451	0.0173161	0.855951	0.0365726	0.0776894	0.81309	0.166153	0	0	NA	NA	NA
X100149164_TGI_at	100149164_TGI_at	NM_000898	MAOB	monoamine oxidase B	1.36e-11	0.751681	0.00164775	0.878659	0.00698778	0.107896	0.893895	0.208857	0	0	NA	NA	NA
X100149234_TGI_at	100149234_TGI_at	NM_000405	GM2A	GM2 ganglioside activator	9.05e-15	1.69922	6.46e-05	1.25283	0.000804433	1.41e-07	1.5829	0.00013516	0	1	U4	U1	U1
X100149268_TGI_at	100149268_TGI_at	NM_002437	MPV17	MpV17 mitochondrial inner membrane protein	3.76e-14	1.26861	0.000222313	1.12268	0.00175187	0.0126269	1.149	0.0464474	0	1	U4	U1	U1
X100149293_TGI_at	100149293_TGI_at	U52840	SEMA5A	sema domain, seven thrombospondin repeats (type 1 and type 1-like), transmembrane domain (TM) and short cytoplasmic domain, (semaphorin) 5A	7.01e-11	0.710297	0.113934	0.897978	0.155072	0.159284	1.04781	0.276601	0	0	NA	NA	NA
X100149296_TGI_at	100149296_TGI_at	BI668583	SH3BGRL	SH3 domain binding glutamic acid-rich protein like	1.98e-09	1.21703	1.1e-05	1.22692	0.000288889	0.0028869	1.29839	0.0178932	0	1	U1	U1	U1
X100149300_TGI_at	100149300_TGI_at	NM_024841		protor-2	1.74e-07	0.719296	0.14115	0.912821	0.18508	0.0528906	0.824261	0.126178	0	0	NA	NA	NA
X100149313_TGI_at	100149313_TGI_at	NM_007161	LST1	leukocyte specific transcript 1	1.02e-09	1.34719	0.132047	1.09013	0.175785	0.00410091	1.40558	0.0220655	0	0	NA	NA	NA
X100149337_TGI_at	100149337_TGI_at	NM_020909	EPB41L5	erythrocyte membrane protein band 4.1 like 5	1.9e-08	0.747417	0.431797	0.939858	0.476114	0.967011	1.01695	0.980395	0	0	NA	NA	NA
X100149338_TGI_at	100149338_TGI_at	NM_014583	LMCD1	LIM and cysteine-rich domains 1	6.52e-11	0.714071	0.000203591	0.846559	0.00164044	0.767721	0.96794	0.850005	0	0	NA	NA	NA
X100149339_TGI_at	100149339_TGI_at	DQ891837	ATP6V1B2	ATPase, H+ transporting, lysosomal 56/58kDa, V1 subunit B2	2.06e-12	1.45	0.00237656	1.18964	0.00888007	0.000923705	1.34041	0.00896717	0	1	U2	U1	U1
X100149360_TGI_at	100149360_TGI_at	ENST00000333132	TRPC2	transient receptor potential cation channel, subfamily C, member 2 (pseudogene)	1.61e-07	1.37395	0.0028045	1.18068	0.00995474	0.0108553	1.3283	0.0419049	0	1	U1	U1	U1
X100149363_TGI_at	100149363_TGI_at	BQ008553	FKBP15	FK506 binding protein 15, 133kDa	7.5e-13	1.50911	0.00848957	1.19326	0.0219774	0.0155172	1.23971	0.0529599	0	0	NA	NA	NA
X100149367_TGI_at	100149367_TGI_at	NM_016523	KLRF1	killer cell lectin-like receptor subfamily F, member 1	9.16e-07	0.606466	0.272074	0.912334	0.32109	0.940656	0.970359	0.965521	0	0	NA	NA	NA
X100149391_TGI_at	100149391_TGI_at	NM_004004	GJB2	gap junction protein, beta 2, 26kDa	1.2e-06	1.78929	0.0630709	1.38045	0.0978708	0.736969	1.05253	0.8256	0	0	NA	NA	NA
X100149426_TGI_at	100149426_TGI_at	NM_145018	C11orf82	chromosome 11 open reading frame 82	3.48e-08	1.6703	0.000428415	1.45686	0.00272343	0.0397198	1.36124	0.101662	0	0	NA	NA	NA
X100149429_TGI_at	100149429_TGI_at	NM_003385	VSNL1	visinin-like 1	6.16e-08	0.771902	0.553292	1.05097	0.589898	0.660414	0.906523	0.764285	0	0	NA	NA	NA
X100149448_TGI_at	100149448_TGI_at	BX537989	HEXA	hexosaminidase A (alpha polypeptide)	1.29e-10	1.36335	0.00140387	1.16406	0.00620667	0.000753789	1.41423	0.00791355	0	1	U2	U2	U1
X100149465_TGI_at	100149465_TGI_at	NM_021244	RRAGD	Ras-related GTP binding D	5.41e-17	1.89028	0.000645	1.23673	0.00364069	0.00317515	1.3379	0.0191159	0	1	U6	U1	U1
X100149468_TGI_at	100149468_TGI_at	NM_000147	FUCA1	fucosidase, alpha-L- 1, tissue	1.01e-15	1.69341	5.74e-09	1.43485	1.68e-06	7.99e-06	1.50177	0.00117095	1	1	U6	U2	U1
X100149539_TGI_at	100149539_TGI_at	NM_052813	CARD9	caspase recruitment domain family, member 9	5.36e-12	1.58453	0.168692	1.10455	0.214475	0.00479364	1.383	0.0243743	0	0	NA	NA	NA
X100149542_TGI_at	100149542_TGI_at	NM_014505	KCNMB4	potassium large conductance calcium-activated channel, subfamily M, beta member 4	1.46e-12	0.575941	3.82e-05	0.722735	0.000578519	0.30723	0.87994	0.44644	0	0	NA	NA	NA
X100149568_TGI_at	100149568_TGI_at	NM_018211	RAVER2	ribonucleoprotein, PTB-binding 2	9.65e-11	0.762062	0.00954593	0.89418	0.0238131	0.0189804	0.825168	0.0608694	0	0	NA	NA	NA
X100149616_TGI_at	100149616_TGI_at	ENST00000358356	RUNX1	runt-related transcription factor 1	9.16e-07	1.74191	0.0102178	1.38447	0.0249673	0.248076	0.746365	0.381464	0	0	NA	NA	NA
X100149634_TGI_at	100149634_TGI_at	NM_001025356	ANO6	anoctamin 6	2.22e-08	0.787404	0.155076	0.953928	0.200085	0.299374	0.934438	0.437986	0	0	NA	NA	NA
X100149639_TGI_at	100149639_TGI_at	NM_001150	ANPEP	alanyl (membrane) aminopeptidase	7.43e-08	1.69692	0.206625	1.13243	0.255939	0.0210651	1.40144	0.0657876	0	0	NA	NA	NA
X100149643_TGI_at	100149643_TGI_at	NM_000095	COMP	cartilage oligomeric matrix protein	4.62e-15	2.43984	0.000218352	1.41147	0.00172912	0.149505	1.2912	0.264175	0	0	NA	NA	NA
X100149645_TGI_at	100149645_TGI_at	NM_001018109	PIR	pirin (iron-binding nuclear protein)	2.27e-09	1.37823	0.0173361	1.13228	0.0365908	0.0335032	1.1507	0.0910461	0	0	NA	NA	NA
X100149649_TGI_at	100149649_TGI_at	U24152	PAK1	p21 protein (Cdc42/Rac)-activated kinase 1	3.61e-07	1.29749	0.530528	1.03145	0.569015	0.797585	0.986758	0.871691	0	0	NA	NA	NA
X100149661_TGI_at	100149661_TGI_at	AK095651	ENY2	enhancer of yellow 2 homolog (Drosophila)	3.99e-08	0.811053	0.451321	0.978342	0.494093	0.348497	0.949055	0.486869	0	0	NA	NA	NA
X100149722_TGI_at	100149722_TGI_at	NM_199451	ZNF365	zinc finger protein 365	6.52e-16	3.09627	4.65e-05	1.82832	0.000651765	0.00205055	1.86626	0.0149524	0	1	U2	U1	U1
X100149731_TGI_at	100149731_TGI_at	BG548689			2.71e-12	0.696976	0.476259	0.97433	0.51805	0.299374	0.877691	0.437986	0	0	NA	NA	NA
X100149745_TGI_at	100149745_TGI_at	ENST00000311224	CD84	CD84 molecule	2.14e-09	1.40002	0.319834	1.09024	0.368678	0.000312251	1.33523	0.00508276	0	0	NA	NA	NA
X100149771_TGI_at	100149771_TGI_at	NM_013261	PPARGC1A	peroxisome proliferator-activated receptor gamma, coactivator 1 alpha	3.92e-11	0.709571	0.00077099	0.778632	0.00412774	0.0643304	0.853355	0.144788	0	0	NA	NA	NA
X100149777_TGI_at	100149777_TGI_at	CR936721	SMURF2	SMAD specific E3 ubiquitin protein ligase 2	1.15e-11	0.789678	0.23708	0.946898	0.286076	0.660894	1.04853	0.764285	0	0	NA	NA	NA
X100149815_TGI_at	100149815_TGI_at	NM_144988	ALG14	asparagine-linked glycosylation 14 homolog (S. cerevisiae)	8.78e-09	1.24704	0.00178491	1.094	0.00743249	0.526622	1.02187	0.659403	0	0	NA	NA	NA
X100149817_TGI_at	100149817_TGI_at	NM_001079803	GAA	glucosidase, alpha; acid	2.42e-07	1.36632	0.255108	1.06164	0.304186	0.0140369	1.2897	0.0497468	0	0	NA	NA	NA
X100149829_TGI_at	100149829_TGI_at	ENST00000367012	SERTAD4	SERTA domain containing 4	1.08e-09	0.761518	0.141779	0.928713	0.185679	0.0189804	0.742654	0.0608694	0	0	NA	NA	NA
X100149840_TGI_at	100149840_TGI_at	NM_016206	VGLL3	vestigial like 3 (Drosophila)	1.25e-09	0.688102	0.00418961	0.814572	0.0132254	0.0668422	0.845292	0.148369	0	0	NA	NA	NA
X100149842_TGI_at	100149842_TGI_at	BG677853	LAMC2	laminin, gamma 2	5.05e-07	0.802376	0.13062	0.877068	0.17425	0.383639	1.12737	0.520942	0	0	NA	NA	NA
X100149849_TGI_at	100149849_TGI_at	NM_004816	C9orf61	chromosome 9 open reading frame 61	1.13e-08	0.779041	0.0209945	0.854929	0.0424766	0.450742	1.09015	0.587204	0	0	NA	NA	NA
X100149896_TGI_at	100149896_TGI_at	AW959468			1.26e-06	0.757924	0.0169985	0.823865	0.036091	0.709599	0.865209	0.803598	0	0	NA	NA	NA
X100149897_TGI_at	100149897_TGI_at	NM_013302	EEF2K	eukaryotic elongation factor-2 kinase	2.02e-09	0.782181	0.0518221	0.906496	0.0839731	0.0494541	0.866166	0.120113	0	0	NA	NA	NA
X100149902_TGI_at	100149902_TGI_at	NM_001100829	TMEM170B	transmembrane protein 170B	9.15e-07	1.35674	0.000979379	1.2101	0.00475382	0.131303	1.21699	0.240586	0	0	NA	NA	NA
X100149904_TGI_at	100149904_TGI_at	NM_007039	PTPN21	protein tyrosine phosphatase, non-receptor type 21	2.35e-13	0.690595	0.0576161	0.879853	0.0912514	0.231929	1.06643	0.364815	0	0	NA	NA	NA
X100149910_TGI_at	100149910_TGI_at	NM_147161	ACOT11	acyl-CoA thioesterase 11	9.85e-08	1.27994	0.640973	1.01594	0.673575	0.73441	0.952687	0.823592	0	0	NA	NA	NA
X100149922_TGI_at	100149922_TGI_at	ENST00000369936	KIAA1324	KIAA1324	9.44e-08	1.62584	0.0780043	1.20821	0.115484	0.215347	1.19632	0.344449	0	0	NA	NA	NA
X100149944_TGI_at	100149944_TGI_at	NM_001014444	CRYM	crystallin, mu	5.99e-10	1.77309	0.00117213	1.50351	0.00537255	0.0281219	1.49441	0.0808537	0	0	NA	NA	NA
X100149948_TGI_at	100149948_TGI_at	AK095844			4.73e-07	0.713176	0.422084	0.892942	0.467322	0.0614509	0.855076	0.141368	0	0	NA	NA	NA
X100149953_TGI_at	100149953_TGI_at	AF007149	C2orf72	chromosome 2 open reading frame 72	7.15e-07	0.827919	0.232587	0.950768	0.281286	0.938243	0.956982	0.965521	0	0	NA	NA	NA
X100149973_TGI_at	100149973_TGI_at	NM_004851	NAPSA	napsin A aspartic peptidase	2.69e-08	1.21641	0.13624	1.07345	0.180034	0.000392315	1.70732	0.00561969	0	0	NA	NA	NA
X100150000_TGI_at	100150000_TGI_at	AF456765	RDH10	retinol dehydrogenase 10 (all-trans)	4.35e-09	1.55173	0.00155432	1.36302	0.00664398	0.685087	0.945639	0.784939	0	0	NA	NA	NA
X100150018_TGI_at	100150018_TGI_at	NM_018003	UACA	uveal autoantigen with coiled-coil domains and ankyrin repeats	6.87e-09	0.697661	0.0195092	0.863679	0.0401264	0.203035	0.893303	0.330515	0	0	NA	NA	NA
X100150035_TGI_at	100150035_TGI_at	NM_005504	BCAT1	branched chain aminotransferase 1, cytosolic	1.22e-16	2.23558	1.29e-05	1.5247	0.000318541	0.00387157	1.4494	0.0213588	0	1	U8	U2	U1
X100150083_TGI_at	100150083_TGI_at	NM_007210	GALNT6	UDP-N-acetyl-alpha-D-galactosamine:polypeptide N-acetylgalactosaminyltransferase 6 (GalNAc-T6)	6.13e-12	1.64078	0.16621	1.10728	0.212324	0.159284	1.05631	0.276601	0	0	NA	NA	NA
X100150108_TGI_at	100150108_TGI_at	BC004174	NEK6	NIMA (never in mitosis gene a)-related kinase 6	1.27e-16	2.04769	7.83e-06	1.3668	0.000244969	0.000656787	1.3913	0.00742745	0	1	U6	U1	U1
X100150125_TGI_at	100150125_TGI_at	NM_207578	PRKACB	protein kinase, cAMP-dependent, catalytic, beta	3.12e-08	1.5563	2.14e-06	1.4374	0.000101523	0.872643	0.992495	0.925961	0	0	NA	NA	NA
X100150136_TGI_at	100150136_TGI_at	AW073340	BEST1	bestrophin 1	3.2e-07	1.69751	0.00796594	1.35348	0.0209757	0.33998	0.822266	0.480594	0	0	NA	NA	NA
X100150142_TGI_at	100150142_TGI_at	AI093876			1.26e-06	0.770429	0.35494	1.04103	0.40224	0.672949	0.973048	0.774063	0	0	NA	NA	NA
X100150209_TGI_at	100150209_TGI_at	NM_001100812	CXCL16	chemokine (C-X-C motif) ligand 16	2.23e-16	1.63208	7.35e-05	1.32772	0.00086144	2.21e-05	1.59317	0.0017496	0	1	U2	U2	U1
X100150223_TGI_at	100150223_TGI_at	BX538233			1.41e-10	1.93414	0.0230129	1.38549	0.0453642	0.169528	1.33206	0.290015	0	0	NA	NA	NA
X100150224_TGI_at	100150224_TGI_at	NM_000115	EDNRB	endothelin receptor type B	3.11e-12	0.6048	0.00104595	0.796539	0.00495751	0.364619	0.960216	0.503363	0	0	NA	NA	NA
X100150240_TGI_at	100150240_TGI_at	NM_019012	PLEKHA5	pleckstrin homology domain containing, family A member 5	6e-08	0.787211	0.248771	0.948134	0.297661	0.00714438	0.817318	0.0318925	0	0	NA	NA	NA
X100150244_TGI_at	100150244_TGI_at	NM_014845	FIG4	FIG4 homolog (S. cerevisiae)	6.35e-13	1.34061	0.000109206	1.19639	0.0010942	0.0274207	1.18946	0.0794758	0	0	NA	NA	NA
X100150258_TGI_at	100150258_TGI_at	BX648370	KLHL6	kelch-like 6 (Drosophila)	1.64e-12	1.68095	0.00328739	1.23859	0.0112238	0.0195186	1.42766	0.0621625	0	0	NA	NA	NA
X100150278_TGI_at	100150278_TGI_at	NM_005776	CNIH	cornichon homolog (Drosophila)	5.46e-09	1.21895	0.0614634	1.07196	0.0960874	0.0668422	1.11371	0.148369	0	0	NA	NA	NA
X100150279_TGI_at	100150279_TGI_at	BC032683	CCDC88A	coiled-coil domain containing 88A	7.47e-11	1.47863	0.000298613	1.22364	0.00211059	0.00602704	1.2652	0.0281566	0	1	U2	U1	U1
X100150286_TGI_at	100150286_TGI_at	NM_006755	TALDO1	transaldolase 1	1.06e-12	1.2964	0.00203927	1.10898	0.00809608	3.28e-05	1.28714	0.0018051	0	1	U1	U1	U1
X100150289_TGI_at	100150289_TGI_at	NM_182734	PLCB1	phospholipase C, beta 1 (phosphoinositide-specific)	7.06e-08	0.773742	0.51562	0.96246	0.554502	0.00791841	0.785308	0.0343414	0	0	NA	NA	NA
X100150297_TGI_at	100150297_TGI_at	NM_004566	PFKFB3	6-phosphofructo-2-kinase/fructose-2,6-biphosphatase 3	5.02e-07	0.827343	0.284656	0.948251	0.333981	0.100003	0.910783	0.198467	0	0	NA	NA	NA
X100150310_TGI_at	100150310_TGI_at	NM_003118	SPARC	secreted protein, acidic, cysteine-rich (osteonectin)	2.89e-11	0.773635	0.0525818	0.919551	0.0848204	0.660394	1.01228	0.764285	0	0	NA	NA	NA
X100150318_TGI_at	100150318_TGI_at	AK057721			7.02e-12	0.766979	0.272074	0.950807	0.32109	0.753711	1.03592	0.839686	0	0	NA	NA	NA
X100150321_TGI_at	100150321_TGI_at	NM_018371	CSGALNACT1	chondroitin sulfate N-acetylgalactosaminyltransferase 1	5.99e-07	0.777033	0.103678	0.899717	0.144719	0.421328	0.912408	0.560905	0	0	NA	NA	NA
X100150331_TGI_at	100150331_TGI_at	ENST00000329809		hypothetical protein LOC100132684	1.85e-11	0.715833	0.0100517	0.839185	0.0247302	0.169528	1.12446	0.290015	0	0	NA	NA	NA
X100150345_TGI_at	100150345_TGI_at	NM_001387	DPYSL3	dihydropyrimidinase-like 3	2.53e-12	0.698694	0.120573	0.899854	0.162665	0.332421	0.944372	0.47323	0	0	NA	NA	NA
X100150384_TGI_at	100150384_TGI_at	AK024702	MRPS25	mitochondrial ribosomal protein S25	5.69e-11	1.35568	0.0102178	1.11123	0.0249673	0.0832633	1.21434	0.17511	0	0	NA	NA	NA
X100150389_TGI_at	100150389_TGI_at	BC002477	DHTKD1	dehydrogenase E1 and transketolase domain containing 1	8.09e-07	1.20048	0.230795	0.949308	0.279748	0.0320831	1.16927	0.0883194	0	0	NA	NA	NA
X100150426_TGI_at	100150426_TGI_at	NM_020533	MCOLN1	mucolipin 1	4.58e-13	1.53156	0.00358717	1.1589	0.0119068	0.000203903	1.51702	0.00415936	0	1	U4	U1	U1
X100150499_TGI_at	100150499_TGI_at	NM_002253	KDR	kinase insert domain receptor (a type III receptor tyrosine kinase)	1.45e-09	0.716393	0.163096	0.918242	0.208752	0.967011	0.973521	0.980395	0	0	NA	NA	NA
X100150521_TGI_at	100150521_TGI_at	AI702438			1.78e-07	1.65201	0.0364752	1.27426	0.0638217	0.0155445	1.53674	0.0529599	0	0	NA	NA	NA
X100150522_TGI_at	100150522_TGI_at	NM_006678	CD300C	CD300c molecule	5.84e-09	1.59388	0.0464221	1.19539	0.0768983	0.000790925	1.58057	0.00824968	0	0	NA	NA	NA
X100150534_TGI_at	100150534_TGI_at	BX106402			5.84e-08	0.773837	0.0494451	0.890515	0.0808122	0.0307137	0.872655	0.0860038	0	0	NA	NA	NA
X100150549_TGI_at	100150549_TGI_at	NM_001287	CLCN7	chloride channel 7	1.87e-07	1.27699	0.669579	1.01275	0.698852	0.110977	1.1315	0.212903	0	0	NA	NA	NA
X100150554_TGI_at	100150554_TGI_at	NM_001097634	GCNT1	glucosaminyl (N-acetyl) transferase 1, core 2 (beta-1,6-N-acetylglucosaminyltransferase)	5.86e-07	1.35835	0.333052	1.07227	0.381324	0.87511	0.995932	0.925961	0	0	NA	NA	NA
X100150557_TGI_at	100150557_TGI_at	NM_001432	EREG	epiregulin	5.72e-07	2.10272	0.00349717	1.83586	0.0117044	0.103563	1.54976	0.203278	0	0	NA	NA	NA
X100150587_TGI_at	100150587_TGI_at	BQ016416	RCSD1	RCSD domain containing 1	2.55e-07	0.807049	0.137179	0.90486	0.180977	0.55655	1.03207	0.683598	0	0	NA	NA	NA
X100150607_TGI_at	100150607_TGI_at	NM_016256	NAGPA	N-acetylglucosamine-1-phosphodiester alpha-N-acetylglucosaminidase	9.57e-10	1.37013	0.0630709	1.08946	0.0978708	0.00486276	1.26055	0.0243743	0	0	NA	NA	NA
X100150611_TGI_at	100150611_TGI_at	NM_198531	ATP9B	ATPase, class II, type 9B	6.53e-14	1.28901	6.08e-06	1.15899	0.0002034	0.0508153	1.10519	0.122313	0	0	NA	NA	NA
X100150622_TGI_at	100150622_TGI_at	NM_018946	NANS	N-acetylneuraminic acid synthase	1.62e-12	1.3306	0.225582	1.04484	0.274637	0.180248	1.07239	0.304954	0	0	NA	NA	NA
X100150704_TGI_at	100150704_TGI_at	NM_213589	RAPH1	Ras association (RalGDS/AF-6) and pleckstrin homology domains 1	1.41e-10	0.812507	0.238892	0.953358	0.287838	0.241272	0.948618	0.374576	0	0	NA	NA	NA
X100150715_TGI_at	100150715_TGI_at	ENST00000360629	ARGLU1	arginine and glutamate rich 1	6.17e-08	0.722761	0.219191	0.94492	0.268638	0.721969	1.03095	0.813319	0	0	NA	NA	NA
X100150730_TGI_at	100150730_TGI_at	BC026930	TRIM38	tripartite motif-containing 38	2.56e-09	1.21793	0.00104101	1.14682	0.00494137	0.0335032	1.13737	0.0910461	0	0	NA	NA	NA
X100150753_TGI_at	100150753_TGI_at	NM_181882	PRX	periaxin	2.13e-09	0.642066	6.95e-05	0.68323	0.000829593	0.924556	0.993099	0.959351	0	0	NA	NA	NA
X100150793_TGI_at	100150793_TGI_at	DQ893537	PI4K2A	phosphatidylinositol 4-kinase type 2 alpha	5e-09	1.35476	0.198258	1.07759	0.246999	0.0113956	1.27456	0.0432519	0	0	NA	NA	NA
X100150831_TGI_at	100150831_TGI_at	ENST00000328681	PBX1	pre-B-cell leukemia homeobox 1	3.3e-11	0.759806	0.482889	0.955957	0.524201	0.110977	0.872939	0.212903	0	0	NA	NA	NA
X100150856_TGI_at	100150856_TGI_at	NM_006219	PIK3CB	phosphoinositide-3-kinase, catalytic, beta polypeptide	1.75e-07	1.222	0.00307627	1.14664	0.0107072	0.0550347	1.15202	0.129378	0	0	NA	NA	NA
X100150882_TGI_at	100150882_TGI_at	NM_005574	LMO2	LIM domain only 2 (rhombotin-like 1)	7.1e-07	0.821172	0.0630709	0.935553	0.0978708	0.951948	0.962867	0.974385	0	0	NA	NA	NA
X100150912_TGI_at	100150912_TGI_at	NM_173652	C2orf58	chromosome 2 open reading frame 58	3.48e-17	2.67963	3.63e-10	2.03752	1.67e-07	1.89e-05	1.7077	0.0017496	0	1	U8	U3	U2
X100150913_TGI_at	100150913_TGI_at	NM_003720	PSMG1	proteasome (prosome, macropain) assembly chaperone 1	6.96e-09	1.205	0.0320009	1.06968	0.0578133	0.502203	1.05662	0.637495	0	0	NA	NA	NA
X100150919_TGI_at	100150919_TGI_at	BC004287			2.06e-08	0.79832	0.0905818	0.962234	0.130333	0.73441	1.01614	0.823592	0	0	NA	NA	NA
X100150938_TGI_at	100150938_TGI_at	BC043443	OPA1	optic atrophy 1 (autosomal dominant)	1.12e-11	1.39734	0.0394783	1.09673	0.0677883	0.338916	1.06071	0.480594	0	0	NA	NA	NA
X100150944_TGI_at	100150944_TGI_at	NM_032591	SLC9A7	solute carrier family 9 (sodium/hydrogen exchanger), member 7	7.89e-10	1.36204	0.00101496	1.18185	0.00486065	0.0335682	1.16897	0.0910692	0	0	NA	NA	NA
X100150962_TGI_at	100150962_TGI_at	NM_018938	PCDHB4	protocadherin beta 4	4.26e-10	0.639984	0.0280465	0.863912	0.0523516	0.191452	0.802732	0.318231	0	0	NA	NA	NA
X100150963_TGI_at	100150963_TGI_at	NM_002426	MMP12	matrix metallopeptidase 12 (macrophage elastase)	1.28e-13	3.94625	5.65e-05	2.77774	0.000739861	0.061769	1.59719	0.141481	0	0	NA	NA	NA
X100150977_TGI_at	100150977_TGI_at	NM_170600	SH2D3C	SH2 domain containing 3C	5.08e-11	0.694977	0.00339179	0.811275	0.0114588	0.0633093	0.823961	0.144202	0	0	NA	NA	NA
X100151008_TGI_at	100151008_TGI_at	NM_006395	ATG7	ATG7 autophagy related 7 homolog (S. cerevisiae)	2.62e-13	1.41395	0.000416916	1.13478	0.00268744	0.000495904	1.26343	0.00635688	0	1	U5	U1	U1
X100151009_TGI_at	100151009_TGI_at	NM_178181	CDCP1	CUB domain containing protein 1	4.42e-13	1.74264	0.000485426	1.2737	0.00295752	0.00325024	1.42683	0.0191159	0	1	U4	U1	U1
X100151045_TGI_at	100151045_TGI_at	NM_018344	SLC29A3	solute carrier family 29 (nucleoside transporters), member 3	5.6e-11	1.67255	0.00229347	1.31744	0.00869631	0.00325024	1.37465	0.0191159	0	1	U1	U1	U1
X100151046_TGI_at	100151046_TGI_at	NM_181597	UPP1	uridine phosphorylase 1	2.28e-12	1.64361	0.0138892	1.22508	0.0310006	0.0771122	1.21	0.166153	0	0	NA	NA	NA
X100151051_TGI_at	100151051_TGI_at	NM_152280	SYT11	synaptotagmin XI	2.08e-09	0.795137	0.00796594	0.874881	0.0209757	0.0718164	0.86938	0.157337	0	0	NA	NA	NA
X100151083_TGI_at	100151083_TGI_at	AK095741	GREM1	gremlin 1, cysteine knot superfamily, homolog (Xenopus laevis)	2.43e-08	1.5553	0.0173704	1.63693	0.0365914	0.829573	1.10995	0.894817	0	0	NA	NA	NA
X100151085_TGI_at	100151085_TGI_at	AY358502	TPP1	tripeptidyl peptidase I	1.02e-09	1.32445	0.000775214	1.21849	0.00413661	0.0140458	1.25126	0.0497468	0	1	U4	U1	U1
X100151094_TGI_at	100151094_TGI_at	AK001134	PCDH17	protocadherin 17	8.67e-09	0.673705	0.000173587	0.757394	0.00146458	0.089895	0.737257	0.184145	0	0	NA	NA	NA
X100151103_TGI_at	100151103_TGI_at	NM_012320	PLA2G15	phospholipase A2, group XV	2.32e-11	1.55938	0.0831529	1.16531	0.12193	0.000320802	1.50873	0.00511854	0	0	NA	NA	NA
X100151110_TGI_at	100151110_TGI_at	AL832793	LACE1	lactation elevated 1	8.05e-08	1.31923	0.0027128	1.13016	0.00973649	0.642406	1.04853	0.752626	0	0	NA	NA	NA
X100151112_TGI_at	100151112_TGI_at	BC094869	hCG_20426	hCG20426	1.14e-06	1.25006	0.0973394	1.11235	0.137599	0.599134	1.03602	0.718556	0	0	NA	NA	NA
X100151126_TGI_at	100151126_TGI_at	NM_138636	TLR8	toll-like receptor 8	2.56e-11	1.93591	0.0116371	1.26766	0.0272773	0.000398855	1.81162	0.0056257	0	1	U2	U1	U1
X100151132_TGI_at	100151132_TGI_at	AL359559	AGPS	alkylglycerone phosphate synthase	4.76e-10	1.36067	0.000314729	1.18421	0.00219087	0.267058	1.05822	0.403399	0	0	NA	NA	NA
X100151133_TGI_at	100151133_TGI_at	NM_007324	ZFYVE9	zinc finger, FYVE domain containing 9	1.78e-13	0.721902	0.000523918	0.833863	0.00313281	0.647693	0.965377	0.755322	0	0	NA	NA	NA
X100151148_TGI_at	100151148_TGI_at	NM_020663	RHOJ	ras homolog gene family, member J	7.47e-08	0.777871	0.270195	0.939045	0.319393	0.132323	0.892333	0.242041	0	0	NA	NA	NA
X100151151_TGI_at	100151151_TGI_at	NM_015426	WDR51A	WD repeat domain 51A	9.63e-07	1.28873	0.143862	0.944675	0.187796	0.967011	0.996812	0.980395	0	0	NA	NA	NA
X100151205_TGI_at	100151205_TGI_at	ENST00000330165	RBM8A	RNA binding motif protein 8A	2.56e-09	0.820209	0.0357939	0.916311	0.0629028	0.328996	0.93309	0.470432	0	0	NA	NA	NA
X100151228_TGI_at	100151228_TGI_at	ENST00000372234	ANXA11	annexin A11	9.77e-10	0.777265	0.00563397	0.884238	0.0163147	0.0721025	1.10237	0.157337	0	0	NA	NA	NA
X100151247_TGI_at	100151247_TGI_at	M29276	NAGA	N-acetylgalactosaminidase, alpha-	3.18e-10	1.39119	0.0064575	1.1262	0.0180195	0.00530673	1.16665	0.0259933	0	1	U1	U1	U1
X100151274_TGI_at	100151274_TGI_at	NM_032105	PPP1R12B	protein phosphatase 1, regulatory (inhibitor) subunit 12B	6.48e-07	0.797384	0.166942	0.921751	0.21267	0.347588	0.886209	0.486869	0	0	NA	NA	NA
X100151277_TGI_at	100151277_TGI_at	NM_145013	C11orf45	chromosome 11 open reading frame 45	4.04e-07	1.38141	0.039088	1.16824	0.0672335	0.016931	1.28684	0.0564309	0	0	NA	NA	NA
X100151293_TGI_at	100151293_TGI_at	ENST00000367390	LHX9	LIM homeobox 9	2.77e-14	2.69891	4.5e-13	4.31706	1.45e-09	5.09e-05	2.24096	0.00207993	0	1	U3	U4	U2
X100151298_TGI_at	100151298_TGI_at	NM_000687	AHCY	S-adenosylhomocysteine hydrolase	1.73e-09	1.22642	0.0614522	1.05561	0.0960874	0.0668422	1.13201	0.148369	0	0	NA	NA	NA
X100151345_TGI_at	100151345_TGI_at	DQ891810	MTCH2	mitochondrial carrier homolog 2 (C. elegans)	1.42e-11	1.21663	0.0394783	1.062	0.0677883	0.284058	1.05799	0.421122	0	0	NA	NA	NA
X100151378_TGI_at	100151378_TGI_at	AK093872			2.02e-07	0.663856	0.38984	0.922219	0.43642	0.927501	1.00259	0.959351	0	0	NA	NA	NA
X100151383_TGI_at	100151383_TGI_at	NM_000492	CFTR	cystic fibrosis transmembrane conductance regulator (ATP-binding cassette sub-family C, member 7)	1.37e-11	1.88021	0.000450954	1.37636	0.00280584	4.28e-05	2.03639	0.0019691	0	1	U2	U1	U2
X100151404_TGI_at	100151404_TGI_at	NM_032219	MFSD7	major facilitator superfamily domain containing 7	7.43e-08	1.41241	0.0112583	1.12634	0.0266809	0.00607161	1.28536	0.0281566	0	1	U1	U1	U1
X100151438_TGI_at	100151438_TGI_at	NM_013279	C11orf9	chromosome 11 open reading frame 9	1.26e-11	0.636817	0.00657036	0.741683	0.0183027	0.635604	1.1041	0.747431	0	0	NA	NA	NA
X100151440_TGI_at	100151440_TGI_at	AK095147			2.18e-07	0.753544	0.314781	0.955306	0.364026	0.654566	0.944943	0.761612	0	0	NA	NA	NA
X100151456_TGI_at	100151456_TGI_at	NM_033197	C20orf114	chromosome 20 open reading frame 114	3.24e-08	3.46942	0.119919	1.59669	0.162122	0.810392	1.13608	0.881205	0	0	NA	NA	NA
X100151461_TGI_at	100151461_TGI_at	U38545	PLD1	phospholipase D1, phosphatidylcholine-specific	2.07e-09	1.31322	0.000128281	1.16408	0.00120476	0.74692	1.03898	0.832984	0	0	NA	NA	NA
X100151468_TGI_at	100151468_TGI_at	NM_020792	AADACL1	arylacetamide deacetylase-like 1	1.92e-14	1.67566	1.85e-05	1.39027	0.00037225	5.78e-05	1.65857	0.00227111	0	1	U2	U2	U1
X100151470_TGI_at	100151470_TGI_at	X51602	FLT1	fms-related tyrosine kinase 1 (vascular endothelial growth factor/vascular permeability factor receptor)	2.18e-07	0.736187	0.1927	0.892591	0.2411	0.348497	0.887739	0.486869	0	0	NA	NA	NA
X100151495_TGI_at	100151495_TGI_at	BC026873		fin bud initiation factor	5.54e-11	0.534792	0.00500424	0.762591	0.0151301	0.0335032	0.75822	0.0910461	0	0	NA	NA	NA
X100151497_TGI_at	100151497_TGI_at	AK001903			2.08e-09	1.45839	0.00231389	1.31917	0.00875644	0.122858	1.22332	0.22915	0	0	NA	NA	NA
X100151549_TGI_at	100151549_TGI_at	NM_000189	HK2	hexokinase 2	4.39e-13	1.51395	1.94e-05	1.29042	0.000384507	0.000753789	1.40813	0.00791355	0	1	U2	U1	U1
X100151568_TGI_at	100151568_TGI_at	BF791901	TMEM38B	transmembrane protein 38B	5.69e-08	1.33673	0.239165	1.07421	0.287838	0.0746153	1.12614	0.161916	0	0	NA	NA	NA
X100151582_TGI_at	100151582_TGI_at	NM_022343	GLIPR2	GLI pathogenesis-related 2	1.44e-07	1.26209	0.428058	1.02973	0.472962	0.000710321	1.34546	0.00778695	0	0	NA	NA	NA
X100151641_TGI_at	100151641_TGI_at	AK056723		hypothetical LOC158376	1.56e-08	0.729657	0.00185138	0.822756	0.0075617	0.110977	0.868053	0.212903	0	0	NA	NA	NA
X100151752_TGI_at	100151752_TGI_at	NM_001010924	FAM171A1	family with sequence similarity 171, member A1	7.2e-10	0.752488	0.0690579	0.905235	0.105535	0.140182	0.872349	0.252829	0	0	NA	NA	NA
X100151754_TGI_at	100151754_TGI_at	M13230	CTSB	cathepsin B	1.56e-11	1.55093	0.0148013	1.18044	0.0326296	0.000923705	1.47056	0.00896717	0	1	U5	U1	U1
X100151777_TGI_at	100151777_TGI_at	BF513724	RAB30	RAB30, member RAS oncogene family	4.75e-07	0.74129	0.666712	1.03225	0.696085	0.0528906	0.81008	0.126178	0	0	NA	NA	NA
X100151791_TGI_at	100151791_TGI_at	BC036592	GABRB2	gamma-aminobutyric acid (GABA) A receptor, beta 2	3.2e-07	0.677035	0.0591259	0.870171	0.0931392	0.776284	1.0526	0.856275	0	0	NA	NA	NA
X100151855_TGI_at	100151855_TGI_at	NM_182826	SCARA3	scavenger receptor class A, member 3	1.46e-12	0.589839	0.0349775	0.83214	0.0616699	0.0064123	0.676094	0.0292731	0	0	NA	NA	NA
X100151868_TGI_at	100151868_TGI_at	AX748273			4.2e-07	0.751948	0.103915	0.879941	0.144736	0.25501	1.0102	0.38934	0	0	NA	NA	NA
X100151872_TGI_at	100151872_TGI_at	ENST00000231909	ACTR8	ARP8 actin-related protein 8 homolog (yeast)	4.36e-09	1.26859	0.00571512	1.09138	0.0164665	0.711121	1.01818	0.803909	0	0	NA	NA	NA
X100151876_TGI_at	100151876_TGI_at	NM_178862	STT3B	STT3, subunit of the oligosaccharyltransferase complex, homolog B (S. cerevisiae)	1.64e-07	1.21858	0.0290796	1.13028	0.0537714	0.144787	1.12785	0.258531	0	0	NA	NA	NA
X100151884_TGI_at	100151884_TGI_at	NM_018845	RAG1AP1	recombination activating gene 1 activating protein 1	9.64e-11	1.22955	0.970301	0.980758	0.972715	0.023488	1.21547	0.0704859	0	0	NA	NA	NA
X100151899_TGI_at	100151899_TGI_at	AK055806	WDFY3	WD repeat and FYVE domain containing 3	3.48e-08	1.29371	0.00411951	1.12221	0.0130552	0.660894	0.976556	0.764285	0	0	NA	NA	NA
X100151902_TGI_at	100151902_TGI_at	BC037331		hypothetical protein LOC285758	4.9e-07	0.652989	0.0799402	0.836319	0.117862	0.901253	0.953074	0.944937	0	0	NA	NA	NA
X100151923_TGI_at	100151923_TGI_at	ENST00000389041	CSPP1	centrosome and spindle pole associated protein 1	1.44e-07	0.813768	0.0434798	0.887058	0.0729113	0.772133	0.956341	0.852547	0	0	NA	NA	NA
X100151938_TGI_at	100151938_TGI_at	NM_001093771	TXNRD1	thioredoxin reductase 1	2.09e-10	1.34609	0.000945553	1.13665	0.0046456	0.024581	1.17786	0.0729509	0	0	NA	NA	NA
X100151963_TGI_at	100151963_TGI_at	NM_024873	TNIP3	TNFAIP3 interacting protein 3	5.29e-10	1.94461	0.000255868	1.64592	0.00192229	0.000167556	1.78956	0.00402842	0	1	U2	U3	U1
X100151991_TGI_at	100151991_TGI_at	ENST00000356492	MPP3	membrane protein, palmitoylated 3 (MAGUK p55 subfamily member 3)	4e-07	0.763164	0.108834	0.870249	0.149838	0.625254	0.978906	0.737896	0	0	NA	NA	NA
X100152041_TGI_at	100152041_TGI_at	NM_015032	PDS5B	PDS5, regulator of cohesion maintenance, homolog B (S. cerevisiae)	3.61e-07	0.810949	0.0132286	0.93173	0.0300475	0.0721025	0.877347	0.157337	0	0	NA	NA	NA
X100152105_TGI_at	100152105_TGI_at	NM_018103	LRRC8D	leucine rich repeat containing 8 family, member D	3.15e-08	1.25829	0.0383941	1.08787	0.0664221	0.0488071	1.13608	0.118721	0	0	NA	NA	NA
X100152106_TGI_at	100152106_TGI_at	DQ891034	CD164	CD164 molecule, sialomucin	8.46e-14	1.61465	0.000232972	1.29242	0.00180956	0.0161366	1.38143	0.0547454	0	0	NA	NA	NA
X100152121_TGI_at	100152121_TGI_at	DB355827			1.2e-06	0.788747	0.344635	0.962386	0.392217	0.460794	0.946262	0.597401	0	0	NA	NA	NA
X100152123_TGI_at	100152123_TGI_at	NM_025240	CD276	CD276 molecule	7.86e-08	1.35325	0.000819932	1.16592	0.00426921	0.00271917	1.35716	0.0172517	0	1	U1	U1	U1
X100152157_TGI_at	100152157_TGI_at	NM_198570	VWC2	von Willebrand factor C domain containing 2	9.01e-10	1.42175	9.38e-06	1.24964	0.00026296	0.000770124	1.36775	0.00805879	0	1	U2	U2	U2
X100152174_TGI_at	100152174_TGI_at	NM_002310	LIFR	leukemia inhibitory factor receptor alpha	1.55e-09	0.664637	0.311393	0.947695	0.360885	0.32334	0.96139	0.462756	0	0	NA	NA	NA
X100152211_TGI_at	100152211_TGI_at	NM_001005340	GPNMB	glycoprotein (transmembrane) nmb	3.55e-11	1.35823	0.0022323	1.11157	0.00859149	0.00622491	1.28087	0.0287023	0	1	U2	U1	U1
X100152229_TGI_at	100152229_TGI_at	ENST00000367555	NPL	N-acetylneuraminate pyruvate lyase (dihydrodipicolinate synthase)	1.84e-10	1.79006	0.000278706	1.36073	0.00201858	0.000108253	1.75427	0.00332284	0	1	U2	U1	U1
X100152235_TGI_at	100152235_TGI_at	X77690			9.91e-09	0.759737	0.0175305	0.894412	0.0368083	0.481261	0.90557	0.61797	0	0	NA	NA	NA
X100152238_TGI_at	100152238_TGI_at	DQ892572	SSR3	signal sequence receptor, gamma (translocon-associated protein gamma)	3.2e-14	1.2919	0.00243635	1.13139	0.00906737	0.0836159	1.17529	0.17511	0	0	NA	NA	NA
X100152246_TGI_at	100152246_TGI_at	BU934659	TMEM127	transmembrane protein 127	1.56e-07	1.36309	0.382391	1.04127	0.429274	0.0293938	1.19971	0.0835417	0	0	NA	NA	NA
X100152256_TGI_at	100152256_TGI_at	NM_005956	MTHFD1	methylenetetrahydrofolate dehydrogenase (NADP+ dependent) 1, methenyltetrahydrofolate cyclohydrolase, formyltetrahydrofolate synthetase	1.24e-12	1.23756	0.0591159	1.05202	0.0931392	0.0643304	1.07535	0.144788	0	0	NA	NA	NA
X100152276_TGI_at	100152276_TGI_at	NM_030637	DDHD1	DDHD domain containing 1	7.51e-12	1.35034	9.94e-05	1.21785	0.00105371	0.00929802	1.20784	0.0380041	0	1	U1	U2	U1
X100152289_TGI_at	100152289_TGI_at	NM_000190	HMBS	hydroxymethylbilane synthase	5.14e-08	1.28296	0.239386	1.0491	0.287889	0.118794	1.13653	0.224033	0	0	NA	NA	NA
X100152297_TGI_at	100152297_TGI_at	NM_153225		RPE-spondin	1.04e-06	0.754579	0.0242016	0.844008	0.0470457	0.00563515	0.800763	0.0269868	0	1	D3	D1	D1
X100152308_TGI_at	100152308_TGI_at	AB067490	C14orf106	chromosome 14 open reading frame 106	1.3e-07	1.33531	1.58e-05	1.24852	0.000345112	0.980203	0.992044	0.987557	0	0	NA	NA	NA
X100152332_TGI_at	100152332_TGI_at	ENST00000335464	TMEM104	transmembrane protein 104	3.43e-09	1.31445	0.0364752	1.11128	0.0638217	0.060804	1.16893	0.140481	0	0	NA	NA	NA
X100152336_TGI_at	100152336_TGI_at	NM_004543	NEB	nebulin	1.18e-06	0.695469	0.14971	0.921052	0.194249	0.33998	0.817729	0.480594	0	0	NA	NA	NA
X100152340_TGI_at	100152340_TGI_at	BC034319			7.64e-16	1.6482	0.00770199	1.16934	0.0204984	0.00402736	1.47692	0.0219631	0	1	U8	U1	U1
X100152354_TGI_at	100152354_TGI_at	ENST00000375751	SYK	spleen tyrosine kinase	6.29e-13	1.44404	0.0310415	1.12219	0.056428	0.000461729	1.3666	0.0060494	0	0	NA	NA	NA
X100152364_TGI_at	100152364_TGI_at	NM_178033	CYP4X1	cytochrome P450, family 4, subfamily X, polypeptide 1	1.37e-07	0.754617	0.0980175	0.847783	0.138315	0.0108553	0.694216	0.0419049	0	0	NA	NA	NA
X100152388_TGI_at	100152388_TGI_at	AK128814			5.38e-08	0.805268	0.00426529	0.866718	0.0134248	0.100003	0.907945	0.198467	0	0	NA	NA	NA
X100152439_TGI_at	100152439_TGI_at	NM_024993	LRRTM4	leucine rich repeat transmembrane neuronal 4	1.59e-07	0.690499	0.611455	0.944457	0.645502	0.54546	0.970069	0.674087	0	0	NA	NA	NA
X100152523_TGI_at	100152523_TGI_at	NM_032505	KBTBD8	kelch repeat and BTB (POZ) domain containing 8	2.97e-09	1.6097	0.000107133	1.33953	0.00108242	0.131303	1.2478	0.240586	0	0	NA	NA	NA
X100152525_TGI_at	100152525_TGI_at	NM_014017	ROBLD3	roadblock domain containing 3	7.96e-11	1.21142	0.134176	1.05748	0.177889	0.000461729	1.24427	0.0060494	0	0	NA	NA	NA
X100152530_TGI_at	100152530_TGI_at	BC040700			2.27e-07	0.789246	0.00124424	0.806101	0.00560767	0.575349	1.12851	0.700019	0	0	NA	NA	NA
X100152539_TGI_at	100152539_TGI_at	NM_001099401	SGCE	sarcoglycan, epsilon	2.48e-07	0.761796	0.13972	0.947563	0.183653	0.84613	1.00233	0.906475	0	0	NA	NA	NA
X100152570_TGI_at	100152570_TGI_at	BE082842	TGFB2	transforming growth factor, beta 2	2.34e-09	0.734952	0.911067	1.00685	0.919339	0.73441	0.983275	0.823592	0	0	NA	NA	NA
X100152580_TGI_at	100152580_TGI_at	NM_024582	FAT4	FAT tumor suppressor homolog 4 (Drosophila)	5e-07	0.815727	0.316437	0.938614	0.365678	0.637044	1.05216	0.747431	0	0	NA	NA	NA
X100152601_TGI_at	100152601_TGI_at	NM_022124	CDH23	cadherin-like 23	9.35e-09	0.658731	0.000104664	0.731351	0.00106414	0.110977	0.822348	0.212903	0	0	NA	NA	NA
X100152633_TGI_at	100152633_TGI_at	NM_032630		cyclin-dependent kinase 2-interacting protein	1.31e-08	1.21357	0.208672	1.03641	0.25788	0.000188734	1.32668	0.00402842	0	0	NA	NA	NA
X100152641_TGI_at	100152641_TGI_at	AI640147	NPC1	Niemann-Pick disease, type C1	9.17e-08	1.35198	0.268305	1.07362	0.317339	0.00344495	1.4007	0.0196615	0	0	NA	NA	NA
X100152651_TGI_at	100152651_TGI_at	BC000284	GGA2	golgi associated, gamma adaptin ear containing, ARF binding protein 2	4.65e-10	1.40213	0.0178019	1.15368	0.0372086	0.00883112	1.29095	0.0369645	0	1	U1	U1	U1
X100152698_TGI_at	100152698_TGI_at	NM_017424	CECR1	cat eye syndrome chromosome region, candidate 1	1.93e-10	1.36161	0.00925666	1.15071	0.0233262	0.0195186	1.2355	0.0621625	0	0	NA	NA	NA
X100152777_TGI_at	100152777_TGI_at	DB503292	APOE	apolipoprotein E	3.34e-09	2.17805	0.0255167	1.36406	0.0489234	0.00200392	2.25493	0.0146454	0	1	U4	U1	U1
X100152788_TGI_at	100152788_TGI_at	NM_004069	AP2S1	adaptor-related protein complex 2, sigma 1 subunit	1.64e-09	1.30699	0.186744	1.03927	0.234741	0.0214252	1.28202	0.0663975	0	0	NA	NA	NA
X100152789_TGI_at	100152789_TGI_at	AK125370			8.01e-08	0.801301	0.00732493	0.854275	0.0197393	0.901253	0.965841	0.944937	0	0	NA	NA	NA
X100152796_TGI_at	100152796_TGI_at	AK023406	MACF1	microtubule-actin crosslinking factor 1	2.12e-12	0.781549	0.0810723	0.934663	0.119204	0.709599	1.02131	0.803598	0	0	NA	NA	NA
X100152803_TGI_at	100152803_TGI_at	NM_005564	LCN2	lipocalin 2	1.56e-08	2.18394	0.163484	1.29499	0.208926	0.0694323	1.69984	0.153169	0	0	NA	NA	NA
X100152816_TGI_at	100152816_TGI_at	NM_006495	EVI2B	ecotropic viral integration site 2B	3.3e-12	1.41369	0.0380271	1.12359	0.065912	0.000355178	1.48118	0.00537129	0	0	NA	NA	NA
X100152827_TGI_at	100152827_TGI_at	BC000297	HMGCS1	3-hydroxy-3-methylglutaryl-Coenzyme A synthase 1 (soluble)	4.9e-07	1.50065	0.00389894	1.32644	0.0126041	0.00137087	1.56914	0.0113874	0	1	U2	U1	U1
X100152837_TGI_at	100152837_TGI_at	AW291937	SPTBN1	spectrin, beta, non-erythrocytic 1	1.4e-07	0.754266	0.0157657	0.826076	0.0341715	0.635604	1.06716	0.747431	0	0	NA	NA	NA
X100152897_TGI_at	100152897_TGI_at	AK021543		similar to hCG2041313	5.03e-09	0.6869	0.303879	0.941336	0.353065	0.611187	0.970697	0.72702	0	0	NA	NA	NA
X100152941_TGI_at	100152941_TGI_at	AY303972	PDXK	pyridoxal (pyridoxine, vitamin B6) kinase	2.53e-12	1.43745	0.214903	1.07021	0.263912	0.0108553	1.23313	0.0419049	0	0	NA	NA	NA
X100152960_TGI_at	100152960_TGI_at	NM_001457	FLNB	filamin B, beta (actin binding protein 278)	4.32e-10	0.807776	0.00024801	0.868021	0.00188873	0.00750014	0.861839	0.0330232	0	1	D2	D3	D1
X100153031_TGI_at	100153031_TGI_at	AK094995			9.94e-08	0.767601	0.737565	0.96197	0.760451	0.103563	0.896757	0.203278	0	0	NA	NA	NA
X100153035_TGI_at	100153035_TGI_at	NM_024776		NKF3 kinase family member	1.13e-08	0.820835	0.313703	0.962823	0.36317	0.797585	0.994609	0.871691	0	0	NA	NA	NA
X100153079_TGI_at	100153079_TGI_at	NM_015004	EXOSC7	exosome component 7	1.29e-09	1.21895	0.000297871	1.10738	0.00210997	0.0595355	1.07026	0.137946	0	0	NA	NA	NA
X100153090_TGI_at	100153090_TGI_at	NM_003597	KLF11	Kruppel-like factor 11	5.78e-08	0.818206	0.324733	0.958976	0.372859	0.685594	0.981074	0.784963	0	0	NA	NA	NA
X100153140_TGI_at	100153140_TGI_at	NM_020871	LRCH2	leucine-rich repeats and calponin homology (CH) domain containing 2	3.21e-08	0.77937	0.170119	0.947557	0.216118	0.185789	0.944979	0.311549	0	0	NA	NA	NA
X100153150_TGI_at	100153150_TGI_at	AL833266			8.15e-09	1.43513	0.0134637	1.15468	0.0303026	0.173608	1.18685	0.296679	0	0	NA	NA	NA
X100153160_TGI_at	100153160_TGI_at	NM_001029839	C3orf23	chromosome 3 open reading frame 23	2.62e-11	1.29507	0.00152427	1.129	0.00657661	4.28e-05	1.39231	0.0019691	0	1	U3	U1	U1
X100153171_TGI_at	100153171_TGI_at	NM_198053	CD247	CD247 molecule	1.65e-08	0.691123	0.10588	0.883164	0.147027	0.495733	0.92954	0.631021	0	0	NA	NA	NA
X100153179_TGI_at	100153179_TGI_at	NM_003243	TGFBR3	transforming growth factor, beta receptor III	3.02e-11	0.66663	2.51e-05	0.728985	0.000456611	0.9934	0.997753	0.995253	0	0	NA	NA	NA
X100153247_TGI_at	100153247_TGI_at	NM_001001395	LMO3	LIM domain only 3 (rhombotin-like 2)	4.75e-11	1.3535	0.00138191	1.18161	0.00611801	0.00475315	1.30488	0.0243743	0	1	U3	U1	U1
X100153254_TGI_at	100153254_TGI_at	ENST00000381048	TNFRSF10B	tumor necrosis factor receptor superfamily, member 10b	1.16e-14	1.80341	0.006338	1.20174	0.0178094	0.00306378	1.41664	0.0185962	0	1	U6	U1	U1
X100153260_TGI_at	100153260_TGI_at	NM_000297	PKD2	polycystic kidney disease 2 (autosomal dominant)	1.16e-11	0.77166	0.179478	0.948977	0.226757	0.0186209	0.845733	0.0602562	0	0	NA	NA	NA
X100153327_TGI_at	100153327_TGI_at	AK091766		hypothetical protein LOC255480	2.45e-11	0.670546	7.53e-05	0.76326	0.000869522	0.164347	0.885488	0.282652	0	0	NA	NA	NA
X100153333_TGI_at	100153333_TGI_at	AK123772	SLC25A16	solute carrier family 25 (mitochondrial carrier; Graves disease autoantigen), member 16	2.8e-11	1.30993	0.0831123	1.10544	0.121926	0.00574694	1.3036	0.0271988	0	0	NA	NA	NA
X100153341_TGI_at	100153341_TGI_at	NM_016341	PLCE1	phospholipase C, epsilon 1	1.83e-13	0.701489	0.0242016	0.891069	0.0470457	0.980203	1.01003	0.987557	0	0	NA	NA	NA
X100153378_TGI_at	100153378_TGI_at	NM_174941	CD163L1	CD163 molecule-like 1	2.23e-14	2.15887	2.72e-06	1.70763	0.000115604	0.00607161	1.54428	0.0281566	0	1	U6	U3	U1
X100153412_TGI_at	100153412_TGI_at	NM_004388	CTBS	chitobiase, di-N-acetyl-	3.18e-10	1.41809	0.00228776	1.1431	0.00869631	0.282064	1.09221	0.42107	0	0	NA	NA	NA
X100153417_TGI_at	100153417_TGI_at	NM_021259	TMEM8	transmembrane protein 8 (five membrane-spanning domains)	8.27e-08	1.32143	0.666712	0.981734	0.696085	0.0161366	1.26469	0.0547454	0	0	NA	NA	NA
X100153456_TGI_at	100153456_TGI_at	NM_000057	BLM	Bloom syndrome	1.77e-07	1.34888	0.0532173	1.12626	0.0856428	0.836152	0.954372	0.898606	0	0	NA	NA	NA
X100153461_TGI_at	100153461_TGI_at	NM_016008	DYNC2LI1	dynein, cytoplasmic 2, light intermediate chain 1	4.86e-09	0.759793	0.0742469	0.938066	0.111407	0.0349754	0.817718	0.0937039	0	0	NA	NA	NA
X100153568_TGI_at	100153568_TGI_at	AK074450			1.26e-07	1.2608	0.277938	1.06165	0.326933	0.0508153	1.23112	0.122313	0	0	NA	NA	NA
X100153574_TGI_at	100153574_TGI_at	NM_004429	EFNB1	ephrin-B1	1.36e-08	0.730402	0.00300345	0.853752	0.0105333	0.635604	0.939515	0.747431	0	0	NA	NA	NA
X100153577_TGI_at	100153577_TGI_at	BF573028	MAPK1	mitogen-activated protein kinase 1	7.7e-07	1.27692	0.155076	1.06278	0.200085	0.0668422	1.15621	0.148369	0	0	NA	NA	NA
X100153638_TGI_at	100153638_TGI_at	NM_000362	TIMP3	TIMP metallopeptidase inhibitor 3	7.77e-13	0.815952	0.00536836	0.924795	0.01583	0.642406	0.981943	0.752626	0	0	NA	NA	NA
X100153680_TGI_at	100153680_TGI_at	NM_000573	CR1	complement component (3b/4b) receptor 1 (Knops blood group)	7.33e-12	1.78014	0.0268413	1.24019	0.0506199	0.228053	1.22845	0.35942	0	0	NA	NA	NA
X100153712_TGI_at	100153712_TGI_at	NM_014002	IKBKE	inhibitor of kappa light polypeptide gene enhancer in B-cells, kinase epsilon	8.99e-07	1.43421	0.472752	1.07148	0.514409	0.357146	1.09134	0.494451	0	0	NA	NA	NA
X100153769_TGI_at	100153769_TGI_at	NM_003198	TCEB3	transcription elongation factor B (SIII), polypeptide 3 (110kDa, elongin A)	3.22e-11	1.28243	0.0307958	1.0895	0.0561395	0.0189804	1.19952	0.0608694	0	0	NA	NA	NA
X100153770_TGI_at	100153770_TGI_at	NM_000827	GRIA1	glutamate receptor, ionotropic, AMPA 1	2.72e-10	0.680601	0.0471774	0.845355	0.077856	0.816168	0.960101	0.885098	0	0	NA	NA	NA
X100153805_TGI_at	100153805_TGI_at	BC036406			3.2e-07	0.714802	0.380522	0.912017	0.427325	0.421328	0.930118	0.560905	0	0	NA	NA	NA
X100153808_TGI_at	100153808_TGI_at	NM_018249	CDK5RAP2	CDK5 regulatory subunit associated protein 2	2.75e-07	1.20476	0.0979057	1.05427	0.138217	0.182642	1.08063	0.308842	0	0	NA	NA	NA
X100153819_TGI_at	100153819_TGI_at	NM_033512	TSPYL5	TSPY-like 5	2.2e-09	0.809244	0.277061	0.953189	0.326138	0.967011	0.986985	0.980395	0	0	NA	NA	NA
X100153837_TGI_at	100153837_TGI_at	NM_001037582	SCD5	stearoyl-CoA desaturase 5	9.86e-10	0.741522	0.501201	0.951003	0.540801	0.365342	0.936075	0.503363	0	0	NA	NA	NA
X100153853_TGI_at	100153853_TGI_at	NM_005582	CD180	CD180 molecule	1.66e-08	1.58617	0.219212	1.14402	0.268638	0.0748544	1.27037	0.161916	0	0	NA	NA	NA
X100153877_TGI_at	100153877_TGI_at	BC062555	GPT2	glutamic pyruvate transaminase (alanine aminotransferase) 2	2.94e-07	1.26946	0.0719424	1.08554	0.10891	0.197238	0.820179	0.324668	0	0	NA	NA	NA
X100153881_TGI_at	100153881_TGI_at	DB308377			2.98e-08	0.786101	0.102117	0.90934	0.143035	0.759495	1.05681	0.842345	0	0	NA	NA	NA
X100153900_TGI_at	100153900_TGI_at	NM_006270	RRAS	related RAS viral (r-ras) oncogene homolog	7.38e-09	0.769793	0.000765107	0.827136	0.00412365	0.517878	1.08171	0.651746	0	0	NA	NA	NA
X100153921_TGI_at	100153921_TGI_at	ENST00000311127	HEG1	HEG homolog 1 (zebrafish)	2.7e-08	0.78544	0.000889677	0.854991	0.00448737	0.235851	1.11638	0.368289	0	0	NA	NA	NA
X100153946_TGI_at	100153946_TGI_at	ENST00000371110	PIK3AP1	phosphoinositide-3-kinase adaptor protein 1	4.34e-07	1.38165	0.00622746	1.30079	0.0175562	0.0195186	1.35833	0.0621625	0	0	NA	NA	NA
X100153953_TGI_at	100153953_TGI_at	NM_017966	VPS37C	vacuolar protein sorting 37 homolog C (S. cerevisiae)	2.12e-08	1.29206	0.156294	1.0539	0.201333	0.0153743	1.16044	0.0529599	0	0	NA	NA	NA
X100153973_TGI_at	100153973_TGI_at	NM_002658	PLAU	plasminogen activator, urokinase	3.35e-08	1.35129	0.000337896	1.3063	0.00229755	0.374837	1.03955	0.511473	0	0	NA	NA	NA
X100153979_TGI_at	100153979_TGI_at	NM_001033564	C6orf225	chromosome 6 open reading frame 225	1.14e-06	0.745093	0.000854145	0.721449	0.00439762	0.146166	0.815552	0.26056	0	0	NA	NA	NA
X100153984_TGI_at	100153984_TGI_at	NM_003835	RGS9	regulator of G-protein signaling 9	9.61e-07	0.657098	0.00518341	0.779175	0.015489	0.567747	1.0795	0.691814	0	0	NA	NA	NA
X100154002_TGI_at	100154002_TGI_at	NM_030751	ZEB1	zinc finger E-box binding homeobox 1	1.63e-08	0.778926	0.0821393	0.899204	0.120608	0.0643304	0.819629	0.144788	0	0	NA	NA	NA
X100154005_TGI_at	100154005_TGI_at	NM_001496	GFRA3	GDNF family receptor alpha 3	6.55e-12	2.06676	9.76e-05	1.60761	0.00105178	0.161066	1.26932	0.279095	0	0	NA	NA	NA
X100154024_TGI_at	100154024_TGI_at	NM_139018	CD300LF	CD300 molecule-like family member f	1.05e-14	1.76227	0.000185911	1.3578	0.0015483	0.0028869	1.55888	0.0178932	0	1	U6	U1	U1
X100154029_TGI_at	100154029_TGI_at	NM_175862	CD86	CD86 molecule	8.34e-13	1.58922	0.000255115	1.29511	0.00192111	0.00389059	1.39449	0.0213618	0	1	U5	U1	U1
X100154041_TGI_at	100154041_TGI_at	AK123676	CHST11	carbohydrate (chondroitin 4) sulfotransferase 11	3.92e-07	1.30072	0.111952	1.07687	0.15315	0.0177588	1.21622	0.0584046	0	0	NA	NA	NA
X100154083_TGI_at	100154083_TGI_at	NM_213606	SLC16A12	solute carrier family 16, member 12 (monocarboxylic acid transporter 12)	2.11e-11	0.61295	0.00089721	0.729222	0.00451829	0.320447	0.863593	0.461484	0	0	NA	NA	NA
X100154092_TGI_at	100154092_TGI_at	ENST00000369769	KCNA3	potassium voltage-gated channel, shaker-related subfamily, member 3	1.82e-07	1.46038	0.00716251	1.23669	0.0194316	0.00252256	1.62644	0.0167633	0	1	U5	U2	U1
X100154097_TGI_at	100154097_TGI_at	NM_002194	INPP1	inositol polyphosphate-1-phosphatase	2.3e-07	0.809773	0.00160247	0.884831	0.0068317	0.203149	0.908176	0.330515	0	0	NA	NA	NA
X100154168_TGI_at	100154168_TGI_at	BC046126	ABCC3	ATP-binding cassette, sub-family C (CFTR/MRP), member 3	8.05e-13	1.59035	0.0699507	1.08859	0.106697	0.305603	1.118	0.445682	0	0	NA	NA	NA
X100154172_TGI_at	100154172_TGI_at	AL133118	MAPKSP1	MAPK scaffold protein 1	8.58e-16	0.557544	3.1e-08	0.705266	6.24e-06	0.00970792	0.769145	0.039468	0	1	D6	D3	D1
X100154195_TGI_at	100154195_TGI_at	NM_198472	C10orf125	chromosome 10 open reading frame 125	4.37e-12	1.47102	0.021325	1.1481	0.0429239	0.00105544	1.42099	0.00971913	0	1	U1	U1	U1
X100154198_TGI_at	100154198_TGI_at	NM_014142	NUDT5	nudix (nucleoside diphosphate linked moiety X)-type motif 5	1.73e-12	1.21826	0.225582	1.02516	0.274637	0.0614509	1.06837	0.141368	0	0	NA	NA	NA
X100154228_TGI_at	100154228_TGI_at	DQ892427	STAM2	signal transducing adaptor molecule (SH3 domain and ITAM motif) 2	3.8e-07	1.26192	0.557133	1.03733	0.593403	0.284058	1.07484	0.421122	0	0	NA	NA	NA
X100154270_TGI_at	100154270_TGI_at	NM_001012978	BEX5	BEX family member 5	5.64e-14	0.494894	1.85e-07	0.654609	2.37e-05	0.191452	0.866276	0.318231	0	0	NA	NA	NA
X100154274_TGI_at	100154274_TGI_at	BC035116			4.7e-12	0.728486	0.00411516	0.864667	0.0130552	0.203149	0.927278	0.330515	0	0	NA	NA	NA
X100154300_TGI_at	100154300_TGI_at	AK023055		hypothetical LOC441027	8.53e-08	0.780042	0.00920835	0.854208	0.0232955	0.177061	0.898954	0.301462	0	0	NA	NA	NA
X100154315_TGI_at	100154315_TGI_at	BC035518			1.46e-10	0.817334	0.0445578	0.933622	0.0743323	0.493698	0.941926	0.62868	0	0	NA	NA	NA
X100154320_TGI_at	100154320_TGI_at	DB357058	SGCD	sarcoglycan, delta (35kDa dystrophin-associated glycoprotein)	9.19e-08	0.730165	0.255108	0.884391	0.304186	0.180248	0.887999	0.304954	0	0	NA	NA	NA
X100154342_TGI_at	100154342_TGI_at	NM_017944	USP47	ubiquitin specific peptidase 47	6.35e-09	0.817114	0.0301905	0.902088	0.055255	0.284058	0.959477	0.421122	0	0	NA	NA	NA
X100154353_TGI_at	100154353_TGI_at	ENST00000378076	ITGA8	integrin, alpha 8	3.21e-08	0.784719	0.287219	0.940036	0.336132	0.127027	0.820783	0.235834	0	0	NA	NA	NA
X100154454_TGI_at	100154454_TGI_at	BC036074	IMPACT	Impact homolog (mouse)	1.14e-10	1.43521	0.0188586	1.11677	0.0390625	0.832936	0.973866	0.897243	0	0	NA	NA	NA
X100154475_TGI_at	100154475_TGI_at	ENST00000372142	NRG3	neuregulin 3	8.06e-10	0.548095	0.000384776	0.657763	0.00253088	0.374837	0.888724	0.511473	0	0	NA	NA	NA
X100154488_TGI_at	100154488_TGI_at	AL080094		RPE-spondin	7.08e-12	0.649573	0.00763478	0.830013	0.0203699	0.206634	0.880865	0.335845	0	0	NA	NA	NA
X100154531_TGI_at	100154531_TGI_at	ENST00000313966		PRO2055	1.75e-07	1.25223	0.350876	1.06572	0.398054	0.0867106	1.19941	0.179492	0	0	NA	NA	NA
X100154635_TGI_at	100154635_TGI_at	NM_003149	STAC	SH3 and cysteine rich domain	7.51e-12	1.61269	0.012614	1.30874	0.0290186	0.0120105	1.46251	0.0449123	0	1	U1	U1	U1
X100154639_TGI_at	100154639_TGI_at	NM_001079846	CREBBP	CREB binding protein	5.28e-07	0.821105	0.00161605	0.915725	0.00686584	0.672949	0.999753	0.774063	0	0	NA	NA	NA
X100154689_TGI_at	100154689_TGI_at	ENST00000361490	HPS1	Hermansky-Pudlak syndrome 1	8.09e-07	1.26699	0.31419	1.04551	0.363603	0.0224365	1.19941	0.0684132	0	0	NA	NA	NA
X100154706_TGI_at	100154706_TGI_at	NM_003638	ITGA8	integrin, alpha 8	4.77e-07	0.809997	0.232169	0.934789	0.281098	0.711121	0.927196	0.803909	0	0	NA	NA	NA
X100154724_TGI_at	100154724_TGI_at	NM_005428	VAV1	vav 1 guanine nucleotide exchange factor	6.5e-08	1.3034	0.121936	1.08937	0.164298	0.0103148	1.21053	0.0409613	0	0	NA	NA	NA
X100154729_TGI_at	100154729_TGI_at	AK027726	SLC35B4	solute carrier family 35, member B4	6.76e-13	1.30561	0.00281656	1.10342	0.00997558	0.0180658	1.22208	0.0588142	0	0	NA	NA	NA
X100154748_TGI_at	100154748_TGI_at	NM_080869	WFDC12	WAP four-disulfide core domain 12	1.59e-07	1.50426	0.00938818	1.33245	0.023513	0.00200392	1.84703	0.0146454	0	1	U2	U1	U2
X100154760_TGI_at	100154760_TGI_at	AA504757			7.52e-07	0.767717	0.615441	0.938347	0.649285	0.567747	0.913059	0.691814	0	0	NA	NA	NA
X100154774_TGI_at	100154774_TGI_at	NM_053035	MRPS33	mitochondrial ribosomal protein S33	5.23e-10	1.21303	0.00047664	1.12931	0.00290949	0.10722	1.12009	0.208175	0	0	NA	NA	NA
X100154796_TGI_at	100154796_TGI_at	ENST00000356289	AMICA1	adhesion molecule, interacts with CXADR antigen 1	4.54e-15	1.60958	2.02e-06	1.40997	0.000101523	0.00622491	1.45376	0.0287023	0	1	U6	U3	U1
X100154875_TGI_at	100154875_TGI_at	AF135593	VPS41	vacuolar protein sorting 41 homolog (S. cerevisiae)	1.14e-12	1.22951	0.00803808	1.07271	0.0211483	0.000582582	1.20483	0.00692864	0	1	U2	U1	U1
X100154897_TGI_at	100154897_TGI_at	ENST00000378204	EXT1	exostoses (multiple) 1	6.12e-07	0.814623	0.221372	0.938978	0.270566	0.089895	0.899714	0.184145	0	0	NA	NA	NA
X100154904_TGI_at	100154904_TGI_at	AK056075			4.45e-07	0.808894	0.666712	0.982072	0.696085	0.685087	0.988851	0.784939	0	0	NA	NA	NA
X100154905_TGI_at	100154905_TGI_at	NM_002339	LSP1	lymphocyte-specific protein 1	1.87e-07	1.36318	0.0066803	1.15501	0.0185419	0.432377	1.10902	0.569494	0	0	NA	NA	NA
X100154918_TGI_at	100154918_TGI_at	NM_002146	HOXB3	homeobox B3	2.56e-09	0.687769	0.198476	0.923685	0.24708	0.000345371	0.696432	0.00530062	0	0	NA	NA	NA
X100154927_TGI_at	100154927_TGI_at	CF551948	PALLD	palladin, cytoskeletal associated protein	5.86e-07	0.829798	0.783098	0.993873	0.802775	0.776307	0.992918	0.856275	0	0	NA	NA	NA
X100154930_TGI_at	100154930_TGI_at	NM_001080471	PEAR1	platelet endothelial aggregation receptor 1	1.09e-11	0.697918	0.0245644	0.896168	0.0475787	0.431008	0.926708	0.56862	0	0	NA	NA	NA
X100154959_TGI_at	100154959_TGI_at	ENST00000240587	TSHZ3	teashirt zinc finger homeobox 3	7.87e-07	0.795265	0.0310415	0.9008	0.056428	0.0633093	0.841917	0.144202	0	0	NA	NA	NA
X100154966_TGI_at	100154966_TGI_at	BQ185142	IRS1	insulin receptor substrate 1	8.74e-10	0.75651	0.0226732	0.837926	0.0449973	0.103563	0.832568	0.203278	0	0	NA	NA	NA
X100154981_TGI_at	100154981_TGI_at	BC073798	PTPMT1	protein tyrosine phosphatase, mitochondrial 1	9.05e-14	1.36176	0.0849513	1.10501	0.124046	0.0179719	1.2604	0.0588056	0	0	NA	NA	NA
X100154989_TGI_at	100154989_TGI_at	CD672190	PLCE1	phospholipase C, epsilon 1	1.22e-07	0.744296	0.156731	0.932397	0.201735	0.601955	0.987413	0.718556	0	0	NA	NA	NA
X100154997_TGI_at	100154997_TGI_at	AF151890	MRPS16	mitochondrial ribosomal protein S16	5.36e-12	1.25015	0.024071	1.06388	0.046905	0.0411567	1.09105	0.104282	0	0	NA	NA	NA
X100154998_TGI_at	100154998_TGI_at	NM_020156	C1GALT1	core 1 synthase, glycoprotein-N-acetylgalactosamine 3-beta-galactosyltransferase, 1	4.59e-09	1.42834	0.00232563	1.18439	0.00875644	0.0643304	1.25736	0.144788	0	0	NA	NA	NA
X100155006_TGI_at	100155006_TGI_at	NM_006669	LILRB1	leukocyte immunoglobulin-like receptor, subfamily B (with TM and ITIM domains), member 1	2.18e-07	1.31985	0.566122	1.02855	0.602182	0.100344	1.21596	0.198776	0	0	NA	NA	NA
X100155026_TGI_at	100155026_TGI_at	NM_032208	ANTXR1	anthrax toxin receptor 1	1.63e-08	0.825136	0.975096	1.00016	0.977218	0.0528906	0.866674	0.126178	0	0	NA	NA	NA
X100155035_TGI_at	100155035_TGI_at	NM_020726	NLN	neurolysin (metallopeptidase M3 family)	3.34e-09	1.40536	0.0134637	1.1469	0.0303026	0.25976	1.0617	0.395282	0	0	NA	NA	NA
X100155039_TGI_at	100155039_TGI_at	DN914603	BLVRA	biliverdin reductase A	8.95e-08	1.25975	0.107587	1.0898	0.14863	0.000161447	1.36428	0.00402842	0	0	NA	NA	NA
X100155047_TGI_at	100155047_TGI_at	AA258154	PHCA	phytoceramidase, alkaline	1.74e-15	1.76918	0.000570407	1.22864	0.00333048	0.0238896	1.25282	0.0714251	0	0	NA	NA	NA
X100155053_TGI_at	100155053_TGI_at	AK097116			6.79e-09	1.35332	0.0026222	1.1966	0.00950658	0.00980883	1.1919	0.039468	0	1	U1	U1	U1
X100155055_TGI_at	100155055_TGI_at	BC020209	AGPAT4	1-acylglycerol-3-phosphate O-acyltransferase 4 (lysophosphatidic acid acyltransferase, delta)	1.3e-08	1.2455	0.0328732	1.09482	0.058796	0.0049374	1.29344	0.0246335	0	0	NA	NA	NA
X100155056_TGI_at	100155056_TGI_at	AK001890	GNB4	guanine nucleotide binding protein (G protein), beta polypeptide 4	4.68e-07	1.31764	0.0299565	1.09726	0.0549828	0.299374	1.13169	0.437986	0	0	NA	NA	NA
X100155060_TGI_at	100155060_TGI_at	NM_005400	PRKCE	protein kinase C, epsilon	3.43e-09	0.711187	0.000104664	0.767462	0.00106414	0.862086	1.06631	0.916393	0	0	NA	NA	NA
X100155075_TGI_at	100155075_TGI_at	NM_003273	TM7SF2	transmembrane 7 superfamily member 2	3.76e-09	1.37781	0.0561021	1.13066	0.0896021	0.00365367	1.40048	0.0205608	0	0	NA	NA	NA
X100155085_TGI_at	100155085_TGI_at	NM_020796	SEMA6A	sema domain, transmembrane domain (TM), and cytoplasmic domain, (semaphorin) 6A	1.63e-14	0.619878	0.00986855	0.863108	0.0244664	0.611187	0.972234	0.72702	0	0	NA	NA	NA
X100155094_TGI_at	100155094_TGI_at	AF163254	DAPP1	dual adaptor of phosphotyrosine and 3-phosphoinositides	7.43e-08	1.34802	0.194208	1.10248	0.242798	0.144787	1.17785	0.258531	0	0	NA	NA	NA
X100155107_TGI_at	100155107_TGI_at	NM_133373	PLCD3	phospholipase C, delta 3	3.99e-08	0.818466	0.0213577	0.907977	0.0429239	0.0721025	0.897319	0.157337	0	0	NA	NA	NA
X100155126_TGI_at	100155126_TGI_at	AW976724	PHCA	phytoceramidase, alkaline	7.3e-14	1.51697	4.32e-05	1.21266	0.000621028	0.00361626	1.30692	0.0205608	0	1	U2	U2	U1
X100155154_TGI_at	100155154_TGI_at	NM_017671	FERMT1	fermitin family homolog 1 (Drosophila)	8.95e-08	1.54118	0.00143732	1.31708	0.00631989	0.55655	0.837249	0.683598	0	0	NA	NA	NA
X100155160_TGI_at	100155160_TGI_at	NM_201630	LRRN2	leucine rich repeat neuronal 2	2.5e-13	1.49795	4.59e-06	1.27887	0.000162666	0.00146193	1.36528	0.0118985	0	1	U4	U2	U1
X100155163_TGI_at	100155163_TGI_at	BC046159	PPFIBP1	PTPRF interacting protein, binding protein 1 (liprin beta 1)	6.98e-07	0.761401	0.000347494	0.831546	0.00234795	0.191452	0.900463	0.318231	0	0	NA	NA	NA
X100155178_TGI_at	100155178_TGI_at	NM_003200	TCF3	transcription factor 3 (E2A immunoglobulin enhancer binding factors E12/E47)	9.44e-08	0.83001	0.000190009	0.870602	0.00157175	0.450742	0.926511	0.587204	0	0	NA	NA	NA
X100155201_TGI_at	100155201_TGI_at	NM_001085377	MCC	mutated in colorectal cancers	2.06e-08	0.725543	0.430942	0.944809	0.475497	0.0694323	0.82155	0.153169	0	0	NA	NA	NA
X100155227_TGI_at	100155227_TGI_at	NM_006574	CSPG5	chondroitin sulfate proteoglycan 5 (neuroglycan C)	1.14e-12	1.9052	0.00238332	1.42692	0.00889054	0.00304516	1.51683	0.0185962	0	1	U2	U1	U1
X100155230_TGI_at	100155230_TGI_at	BF031974	E2F3	E2F transcription factor 3	3.15e-09	1.3222	0.251157	1.04198	0.300141	0.190865	1.12948	0.318231	0	0	NA	NA	NA
X100155268_TGI_at	100155268_TGI_at	NM_003786	ABCC3	ATP-binding cassette, sub-family C (CFTR/MRP), member 3	7.29e-14	1.89375	0.00437727	1.24856	0.0137237	0.252599	1.13445	0.387495	0	0	NA	NA	NA
X100155280_TGI_at	100155280_TGI_at	AB209366	FUBP1	far upstream element (FUSE) binding protein 1	1.26e-06	0.801309	0.948227	0.980429	0.953255	0.0126269	0.773705	0.0464474	0	0	NA	NA	NA
X100155300_TGI_at	100155300_TGI_at	NM_175571	GIMAP8	GTPase, IMAP family member 8	2.67e-10	0.723835	0.000535197	0.829816	0.00317669	0.55201	0.944548	0.680615	0	0	NA	NA	NA
X100155314_TGI_at	100155314_TGI_at	NM_153267	MAMDC2	MAM domain containing 2	3.55e-11	0.635448	0.0357939	0.897317	0.0629028	0.131303	0.860603	0.240586	0	0	NA	NA	NA
X100155319_TGI_at	100155319_TGI_at	NM_033008	PCBP4	poly(rC) binding protein 4	1.03e-07	0.801251	0.00307627	0.868966	0.0107072	0.431008	0.942894	0.56862	0	0	NA	NA	NA
X100155339_TGI_at	100155339_TGI_at	NM_002068	GNA15	guanine nucleotide binding protein (G protein), alpha 15 (Gq class)	6.16e-08	1.41929	0.47978	1.03376	0.521352	0.00365367	1.28665	0.0205608	0	0	NA	NA	NA
X100155351_TGI_at	100155351_TGI_at	AF086204		similar to WDNM1-like protein	3.11e-12	2.05097	0.03597	1.23181	0.0631091	0.203149	1.2437	0.330515	0	0	NA	NA	NA
X100155403_TGI_at	100155403_TGI_at	NM_020731	AHRR	aryl-hydrocarbon receptor repressor	3.28e-20	6.11544	5.03e-12	4.02751	5.4e-09	1.68e-07	3.9539	0.00013516	1	1	U8	U2	U3
X100155408_TGI_at	100155408_TGI_at	NM_001047434	DPH3	DPH3, KTI11 homolog (S. cerevisiae)	7.77e-12	1.51285	0.000755288	1.22738	0.00409125	0.00791841	1.24074	0.0343414	0	1	U2	U3	U1
X100155426_TGI_at	100155426_TGI_at	AF124366			1.23e-08	0.686429	0.110091	0.873448	0.151054	0.374837	1.09004	0.511473	0	0	NA	NA	NA
X100155442_TGI_at	100155442_TGI_at	ENST00000217246	MACROD2	MACRO domain containing 2	8.95e-08	1.68568	0.102714	1.30737	0.143808	2.28e-05	2.05941	0.0017496	0	0	NA	NA	NA
X100155451_TGI_at	100155451_TGI_at	NM_003044	SLC6A12	solute carrier family 6 (neurotransmitter transporter, betaine/GABA), member 12	9.4e-15	2.52818	0.000169695	1.52316	0.0014355	0.000461729	1.93194	0.0060494	0	1	U1	U1	U1
X100155460_TGI_at	100155460_TGI_at	NM_207103	C17orf87	chromosome 17 open reading frame 87	2.33e-12	1.66855	0.00837706	1.23143	0.0217736	0.00017114	1.68089	0.00402842	0	1	U1	U1	U1
X100155476_TGI_at	100155476_TGI_at	AA278408	ADRBK2	adrenergic, beta, receptor kinase 2	1.44e-12	1.52907	0.0148269	1.1544	0.0326638	4.78e-06	1.40614	0.000962178	0	1	U5	U1	U1
X100155483_TGI_at	100155483_TGI_at	NM_052862	RCSD1	RCSD domain containing 1	6.28e-07	0.79985	0.0049616	0.886437	0.0150577	0.421328	0.948937	0.560905	0	0	NA	NA	NA
X100155486_TGI_at	100155486_TGI_at	NM_014767	SPOCK2	sparc/osteonectin, cwcv and kazal-like domains proteoglycan (testican) 2	2.44e-13	0.721182	0.129071	0.898173	0.172469	0.587187	0.992915	0.708272	0	0	NA	NA	NA
X100155493_TGI_at	100155493_TGI_at	NM_022486	SUSD1	sushi domain containing 1	3.02e-15	1.61488	9.35e-07	1.31419	6.55e-05	0.00929802	1.27272	0.0380041	0	1	U2	U2	U1
X100155509_TGI_at	100155509_TGI_at	NM_021813	BACH2	BTB and CNC homology 1, basic leucine zipper transcription factor 2	1.29e-09	0.685699	4.16e-05	0.764652	0.000607007	0.523607	0.900365	0.657672	0	0	NA	NA	NA
X100155516_TGI_at	100155516_TGI_at	NM_000071	CBS	cystathionine-beta-synthase	8.23e-08	1.48223	0.0616634	1.11496	0.0963359	0.131303	1.24314	0.240586	0	0	NA	NA	NA
X100155606_TGI_at	100155606_TGI_at	NM_001039131	ALOX15B	arachidonate 15-lipoxygenase, type B	4e-11	1.82135	0.0210843	1.2297	0.0425516	5.65e-05	2.40346	0.00224948	0	1	U4	U1	U1
X100155612_TGI_at	100155612_TGI_at	AW970730	ST6GALNAC1	ST6 (alpha-N-acetyl-neuraminyl-2,3-beta-galactosyl-1,3)-N-acetylgalactosaminide alpha-2,6-sialyltransferase 1	6.01e-07	1.33724	0.435129	1.10459	0.479461	0.431008	1.00867	0.56862	0	0	NA	NA	NA
X100155643_TGI_at	100155643_TGI_at	AK093899	PRICKLE2	prickle homolog 2 (Drosophila)	1.1e-06	0.757001	0.39065	0.959683	0.437176	0.374837	0.903356	0.511473	0	0	NA	NA	NA
X100155646_TGI_at	100155646_TGI_at	NM_014214	IMPA2	inositol(myo)-1(or 4)-monophosphatase 2	4.85e-08	1.23338	0.0247159	1.09179	0.0477573	0.00717026	1.27334	0.0319195	0	1	U1	U1	U1
X100155675_TGI_at	100155675_TGI_at	NM_001860	SLC31A2	solute carrier family 31 (copper transporters), member 2	2.37e-11	1.42748	0.0152768	1.15539	0.0333811	0.00139981	1.33128	0.0115092	0	1	U2	U1	U1
X100155677_TGI_at	100155677_TGI_at	NM_002153	HSD17B2	hydroxysteroid (17-beta) dehydrogenase 2	3.92e-07	1.63927	0.0396416	1.2865	0.0679239	0.750005	1.0868	0.835846	0	0	NA	NA	NA
X100155678_TGI_at	100155678_TGI_at	NM_018367	PHCA	phytoceramidase, alkaline	8.41e-08	1.319	0.0154866	1.15207	0.0337024	0.0224365	1.34295	0.0684132	0	0	NA	NA	NA
X100155679_TGI_at	100155679_TGI_at	NM_020685	C3orf14	chromosome 3 open reading frame 14	1.32e-10	1.39966	9.04e-05	1.19977	0.000997879	0.926061	0.980806	0.959351	0	0	NA	NA	NA
X100155726_TGI_at	100155726_TGI_at	NM_002953	RPS6KA1	ribosomal protein S6 kinase, 90kDa, polypeptide 1	1.6e-10	1.31109	0.0573045	1.08421	0.0912041	0.000188734	1.39343	0.00402842	0	0	NA	NA	NA
X100155727_TGI_at	100155727_TGI_at	NM_138712	PPARG	peroxisome proliferator-activated receptor gamma	3.54e-09	1.54616	0.000814161	1.39429	0.00425981	0.000174604	1.74385	0.00402842	0	1	U1	U1	U1
X100155740_TGI_at	100155740_TGI_at	NM_017728	TMEM104	transmembrane protein 104	2.54e-10	1.44223	0.00257274	1.17017	0.00939065	0.00486276	1.2846	0.0243743	0	1	U2	U1	U1
X100155785_TGI_at	100155785_TGI_at	NM_004050	BCL2L2	BCL2-like 2	2.75e-10	0.826657	0.225726	0.93902	0.274637	0.819787	0.970728	0.887827	0	0	NA	NA	NA
X100155821_TGI_at	100155821_TGI_at	NM_001097642	GJB1	gap junction protein, beta 1, 32kDa	1.14e-09	1.74203	0.0418679	1.25385	0.0707976	0.000399716	1.76064	0.0056257	0	0	NA	NA	NA
X100155842_TGI_at	100155842_TGI_at	AK056255	BCAT1	branched chain aminotransferase 1, cytosolic	1.51e-11	2.21583	0.0338232	1.30562	0.059864	0.180248	1.3735	0.304954	0	0	NA	NA	NA
X100155879_TGI_at	100155879_TGI_at	BU741143			1.66e-12	1.33729	0.00700278	1.10662	0.0191433	0.215347	1.1046	0.344449	0	0	NA	NA	NA
X100155939_TGI_at	100155939_TGI_at	NM_015033	FNBP1	formin binding protein 1	3.88e-08	0.808643	0.0988613	0.947855	0.139261	0.287686	0.95056	0.426108	0	0	NA	NA	NA
X100155950_TGI_at	100155950_TGI_at	NM_032571	EMR3	egf-like module containing, mucin-like, hormone receptor-like 3	2.99e-11	1.80243	1.43e-05	1.60784	0.000331475	0.0224365	1.42427	0.0684132	0	0	NA	NA	NA
X100155979_TGI_at	100155979_TGI_at	NM_020179	C11orf75	chromosome 11 open reading frame 75	7.5e-13	1.59027	0.0231411	1.11599	0.0454225	0.0126569	1.23005	0.0464474	0	1	U2	U1	U1
X100155989_TGI_at	100155989_TGI_at	AK056963			2.28e-10	0.782036	0.239165	0.933597	0.287838	0.924556	1.02414	0.959351	0	0	NA	NA	NA
X100156137_TGI_at	100156137_TGI_at	NM_015459	ATL3	atlastin GTPase 3	1.85e-12	1.37678	0.0622442	1.07554	0.0970843	0.174828	1.07148	0.29829	0	0	NA	NA	NA
X100156138_TGI_at	100156138_TGI_at	NM_032265	ZMYND15	zinc finger, MYND-type containing 15	5.08e-11	1.63013	0.00282801	1.25548	0.00999713	0.000371641	1.67796	0.00537129	0	1	U2	U1	U1
X100156210_TGI_at	100156210_TGI_at	ENST00000379459	EHD3	EH-domain containing 3	1.64e-07	0.704822	0.0380003	0.874975	0.065912	0.203035	0.840126	0.330515	0	0	NA	NA	NA
X100156233_TGI_at	100156233_TGI_at	NM_001076552	ACSS2	acyl-CoA synthetase short-chain family member 2	1.18e-12	1.44944	0.00503	1.15108	0.0151937	0.00236704	1.31343	0.0160949	0	1	U4	U1	U1
X100156250_TGI_at	100156250_TGI_at	NM_198129	LAMA3	laminin, alpha 3	9.84e-13	0.691015	0.14415	0.874563	0.188019	0.599134	1.0919	0.718556	0	0	NA	NA	NA
X100156251_TGI_at	100156251_TGI_at	NM_018052	VAC14	Vac14 homolog (S. cerevisiae)	5.49e-09	1.34649	0.0222379	1.08859	0.0442697	0.00514313	1.22545	0.0254238	0	1	U4	U1	U1
X100156267_TGI_at	100156267_TGI_at	NM_054023	SCGB3A2	secretoglobin, family 3A, member 2	9.18e-12	1.51231	0.00013867	1.29991	0.0012661	0.0020933	1.29838	0.0149688	0	1	U1	U2	U1
X100156282_TGI_at	100156282_TGI_at	L12392	HTT	huntingtin	6e-08	1.21983	0.401395	1.02692	0.447337	0.0836159	1.12422	0.17511	0	0	NA	NA	NA
X100156312_TGI_at	100156312_TGI_at	AF190725	BACE1	beta-site APP-cleaving enzyme 1	7.15e-07	1.21089	0.0231411	1.11994	0.0454225	0.0658972	1.15317	0.147696	0	0	NA	NA	NA
X100156330_TGI_at	100156330_TGI_at	NM_015687	FILIP1	filamin A interacting protein 1	4.65e-07	1.24583	0.0743865	1.05722	0.111407	0.39299	1.09887	0.532043	0	0	NA	NA	NA
X100156343_TGI_at	100156343_TGI_at	NM_024501	HOXD1	homeobox D1	8.33e-09	1.76973	0.000109657	1.52687	0.0010942	3.38e-05	2.32374	0.0018051	0	1	U1	U2	U1
X100156370_TGI_at	100156370_TGI_at	N49471	DAAM1	dishevelled associated activator of morphogenesis 1	2.02e-09	0.773559	5.81e-05	0.860067	0.0007487	0.611235	1.04126	0.72702	0	0	NA	NA	NA
X100156384_TGI_at	100156384_TGI_at	NM_080870	DPCR1	diffuse panbronchiolitis critical region 1	2.76e-09	1.77762	0.000124681	1.5705	0.00119474	0.000188734	2.27049	0.00402842	0	1	U4	U2	U1
X100156398_TGI_at	100156398_TGI_at	NM_176796	P2RY6	pyrimidinergic receptor P2Y, G-protein coupled, 6	1.56e-08	1.44184	0.0471774	1.13719	0.077856	0.534478	1.06706	0.664336	0	0	NA	NA	NA
X100156422_TGI_at	100156422_TGI_at	NM_004231	ATP6V1F	ATPase, H+ transporting, lysosomal 14kDa, V1 subunit F	1.01e-15	1.49093	0.00478784	1.13915	0.0145853	1.98e-05	1.35058	0.0017496	0	1	U4	U1	U1
X100156435_TGI_at	100156435_TGI_at	NM_006665	HPSE	heparanase	2.72e-07	1.51058	0.737565	1.03453	0.760451	0.927501	1.01925	0.959351	0	0	NA	NA	NA
X100156442_TGI_at	100156442_TGI_at	AI131310			2.1e-10	0.594118	0.0841478	0.835329	0.123109	0.315219	0.979871	0.454361	0	0	NA	NA	NA
X100156451_TGI_at	100156451_TGI_at	AK092659	SHROOM4	shroom family member 4	1.75e-08	0.790594	0.00581624	0.854348	0.0166481	0.601955	1.0805	0.718556	0	0	NA	NA	NA
X100156468_TGI_at	100156468_TGI_at	CK001662			2.49e-08	0.774425	0.295868	0.952288	0.345251	0.849099	1.00414	0.906475	0	0	NA	NA	NA
X100156510_TGI_at	100156510_TGI_at	NM_016066	GLRX2	glutaredoxin 2	7.18e-10	1.28497	0.0189248	1.09766	0.0391494	0.0108553	1.19113	0.0419049	0	1	U1	U1	U1
X100156651_TGI_at	100156651_TGI_at	XM_290799	ARHGAP23	Rho GTPase activating protein 23	3.98e-09	0.764141	2.96e-05	0.850611	0.000491632	0.0439489	0.852449	0.10938	0	0	NA	NA	NA
X100156652_TGI_at	100156652_TGI_at	NM_002083	GPX2	glutathione peroxidase 2 (gastrointestinal)	6.23e-10	2.49063	0.051136	1.63024	0.0831532	0.357146	1.22333	0.494451	0	0	NA	NA	NA
X100156688_TGI_at	100156688_TGI_at	AK021612	MYCT1	myc target 1	3.06e-07	0.78171	0.00557367	0.872402	0.0162423	0.759495	0.995451	0.842345	0	0	NA	NA	NA
X100156693_TGI_at	100156693_TGI_at	AL833176	CHST11	carbohydrate (chondroitin 4) sulfotransferase 11	5.94e-10	1.30647	0.013452	1.11434	0.0303026	0.00607161	1.21987	0.0281566	0	1	U1	U1	U1
X100156707_TGI_at	100156707_TGI_at	NM_003684	MKNK1	MAP kinase interacting serine/threonine kinase 1	2.86e-07	1.21325	0.0393191	1.07008	0.067587	0.0186209	1.14858	0.0602562	0	0	NA	NA	NA
X100156711_TGI_at	100156711_TGI_at	AK128437	GALNT7	UDP-N-acetyl-alpha-D-galactosamine:polypeptide N-acetylgalactosaminyltransferase 7 (GalNAc-T7)	1.37e-09	1.3695	0.350876	1.0393	0.398054	0.197238	1.21486	0.324668	0	0	NA	NA	NA
X100156712_TGI_at	100156712_TGI_at	AU148886	CLCN4	chloride channel 4	3.74e-07	1.29408	0.18295	1.07204	0.230691	0.0545025	1.24996	0.128784	0	0	NA	NA	NA
X100156730_TGI_at	100156730_TGI_at	NM_012331	MSRA	methionine sulfoxide reductase A	3.43e-09	1.26253	0.00314995	1.13459	0.0108581	0.0108553	1.27921	0.0419049	0	1	U2	U1	U1
X100156780_TGI_at	100156780_TGI_at	NM_018084	CCDC88A	coiled-coil domain containing 88A	5.22e-11	1.34947	0.0325366	1.10033	0.0584337	0.238684	1.08133	0.372172	0	0	NA	NA	NA
X100156798_TGI_at	100156798_TGI_at	BX648604		similar to phosphodiesterase 4D, cAMP specific	2.12e-12	1.77265	2.09e-08	1.80045	4.82e-06	0.00120389	1.54243	0.0106305	0	1	U4	U3	U1
X100156813_TGI_at	100156813_TGI_at	NM_032023	RASSF4	Ras association (RalGDS/AF-6) domain family member 4	1.26e-06	1.29177	0.297626	1.08138	0.347051	0.30723	1.12006	0.44644	0	0	NA	NA	NA
X100156873_TGI_at	100156873_TGI_at	NM_004454	ETV5	ets variant 5	8.82e-09	0.789098	0.00551764	0.839007	0.0161081	0.365926	1.13897	0.503363	0	0	NA	NA	NA
X100156891_TGI_at	100156891_TGI_at	NM_000337	SGCD	sarcoglycan, delta (35kDa dystrophin-associated glycoprotein)	7.92e-09	0.68806	0.0789674	0.833951	0.116642	0.849099	0.982909	0.906475	0	0	NA	NA	NA
X100156914_TGI_at	100156914_TGI_at	NM_021902	FXYD1	FXYD domain containing ion transport regulator 1	1.25e-07	0.716791	0.047284	0.843934	0.0779521	0.203035	0.863349	0.330515	0	0	NA	NA	NA
X100156920_TGI_at	100156920_TGI_at	NM_006406	PRDX4	peroxiredoxin 4	6.17e-10	1.23137	0.132694	1.05551	0.17636	0.32334	1.07413	0.462756	0	0	NA	NA	NA
X100156921_TGI_at	100156921_TGI_at	NM_016121	KCTD3	potassium channel tetramerisation domain containing 3	4.1e-08	0.749135	0.705838	0.97308	0.732899	0.421328	0.921118	0.560905	0	0	NA	NA	NA
X100156951_TGI_at	100156951_TGI_at	AF087573	DFFA	DNA fragmentation factor, 45kDa, alpha polypeptide	3.01e-07	1.24029	0.920877	1.00796	0.928076	0.131303	1.15504	0.240586	0	0	NA	NA	NA
X100156974_TGI_at	100156974_TGI_at	NM_003887	ASAP2	ArfGAP with SH3 domain, ankyrin repeat and PH domain 2	1.5e-12	0.78076	0.447155	0.969982	0.490198	0.0126963	0.883684	0.0464474	0	0	NA	NA	NA
X100156986_TGI_at	100156986_TGI_at	NM_001024372	BAALC	brain and acute leukemia, cytoplasmic	3.99e-08	0.630223	0.00115177	0.788305	0.00533845	0.0643304	0.753196	0.144788	0	0	NA	NA	NA
X100156994_TGI_at	100156994_TGI_at	AI809436	FBXL19	F-box and leucine-rich repeat protein 19	2.29e-11	1.3882	0.00465962	1.11775	0.0143392	0.0804744	1.1067	0.170587	0	0	NA	NA	NA
X100157016_TGI_at	100157016_TGI_at	BC114506	DAPK2	death-associated protein kinase 2	7.69e-07	0.788485	0.0622442	0.863052	0.0970843	0.303779	1.12471	0.443625	0	0	NA	NA	NA
X100157057_TGI_at	100157057_TGI_at	NM_001624	AIM1	absent in melanoma 1	2.04e-10	1.29049	0.0968707	1.06281	0.136996	0.0114202	1.16253	0.0432519	0	0	NA	NA	NA
X100157127_TGI_at	100157127_TGI_at	NM_000483	APOC2	apolipoprotein C-II	8.05e-09	2.11129	0.000337896	1.63522	0.00229755	0.000987594	2.33688	0.00935714	0	1	U1	U2	U1
X100157152_TGI_at	100157152_TGI_at	AK095050	TMEM108	transmembrane protein 108	3.39e-08	0.781474	0.644732	0.966721	0.677084	0.601955	0.955566	0.718556	0	0	NA	NA	NA
X100157155_TGI_at	100157155_TGI_at	NM_015493	KANK2	KN motif and ankyrin repeat domains 2	9.34e-11	0.78771	0.02349	0.920491	0.0459395	0.00881654	0.867799	0.0369645	0	1	D2	D1	D1
X100157167_TGI_at	100157167_TGI_at	BC043194			1.27e-07	0.760263	0.428455	0.960769	0.473238	0.0965397	0.802684	0.193392	0	0	NA	NA	NA
X100157171_TGI_at	100157171_TGI_at	NM_000136	FANCC	Fanconi anemia, complementation group C	4.84e-07	0.804091	0.000739884	0.85764	0.00403493	0.797585	1.02209	0.871691	0	0	NA	NA	NA
X100157179_TGI_at	100157179_TGI_at	ENST00000356338	MYO5A	myosin VA (heavy chain 12, myoxin)	6.22e-14	1.59753	0.00155273	1.20523	0.00664398	0.000987594	1.34673	0.00935714	0	1	U6	U1	U1
X100157203_TGI_at	100157203_TGI_at	NM_138765	BAX	BCL2-associated X protein	8.94e-13	1.43189	0.0646712	1.10727	0.100113	0.0103148	1.41301	0.0409613	0	0	NA	NA	NA
X100157226_TGI_at	100157226_TGI_at	NM_182609	ZNF677	zinc finger protein 677	1.35e-08	0.684321	0.0839292	0.891098	0.122845	0.00930352	0.819832	0.0380041	0	0	NA	NA	NA
X100157240_TGI_at	100157240_TGI_at	NM_001885	CRYAB	crystallin, alpha B	5.25e-09	0.74461	0.0251452	0.841874	0.0483838	0.0180658	0.837511	0.0588142	0	0	NA	NA	NA
X100157242_TGI_at	100157242_TGI_at	NM_000528	MAN2B1	mannosidase, alpha, class 2B, member 1	1.74e-13	1.53889	0.00326883	1.14998	0.0111841	0.00523506	1.28034	0.0257204	0	1	U4	U1	U1
X100157244_TGI_at	100157244_TGI_at	NM_001098500	KIAA1217	KIAA1217	1.48e-08	0.790477	0.227763	0.961416	0.276582	0.0380823	0.868044	0.0995452	0	0	NA	NA	NA
X100157255_TGI_at	100157255_TGI_at	ENST00000333475		similar to kinesin-like motor protein C20orf23	8.73e-09	0.684855	0.0237055	0.813994	0.0463047	0.797585	0.960042	0.871691	0	0	NA	NA	NA
X100157287_TGI_at	100157287_TGI_at	AK094744			2.62e-07	0.812098	0.267714	0.935253	0.316872	0.940656	1.00935	0.965521	0	0	NA	NA	NA
X100157299_TGI_at	100157299_TGI_at	AL050184	MAGI1	membrane associated guanylate kinase, WW and PDZ domain containing 1	4.1e-08	0.826989	0.00317776	0.894162	0.0109422	0.979809	1.01798	0.987557	0	0	NA	NA	NA
X100157315_TGI_at	100157315_TGI_at	NM_012338	TSPAN12	tetraspanin 12	1.04e-06	0.727692	0.402444	0.947376	0.448233	0.70408	1.05361	0.801289	0	0	NA	NA	NA
X100157333_TGI_at	100157333_TGI_at	NM_003622	PPFIBP1	PTPRF interacting protein, binding protein 1 (liprin beta 1)	1.46e-08	0.690209	0.0124119	0.770958	0.0286764	0.784831	1.00571	0.86155	0	0	NA	NA	NA
X100157335_TGI_at	100157335_TGI_at	NM_152545	RASGEF1B	RasGEF domain family, member 1B	7.63e-08	1.61059	0.00061425	1.39733	0.00350599	0.0028869	1.49441	0.0178932	0	1	U1	U1	U1
X100157346_TGI_at	100157346_TGI_at	ENST00000320306	FAM82B	family with sequence similarity 82, member B	1.36e-09	1.22669	0.00638554	1.07177	0.0178496	0.00337162	1.27439	0.0196505	0	1	U2	U1	U1
X100157349_TGI_at	100157349_TGI_at	NM_207627	ABCG1	ATP-binding cassette, sub-family G (WHITE), member 1	3.88e-09	1.23182	0.0213577	1.13132	0.0429239	0.000345371	1.38926	0.00530062	0	1	U1	U1	U1
X100157378_TGI_at	100157378_TGI_at	NM_019593	RP5-1022P6.2	hypothetical protein KIAA1434	8.74e-10	1.27423	0.0103707	1.13075	0.0252452	0.226312	1.0762	0.358253	0	0	NA	NA	NA
X100157396_TGI_at	100157396_TGI_at	NM_152565	ATP6V0D2	ATPase, H+ transporting, lysosomal 38kDa, V0 subunit d2	7.64e-16	5.88936	4.58e-07	3.57364	4.08e-05	5.09e-05	3.27184	0.00207993	0	1	U2	U3	U1
X100157407_TGI_at	100157407_TGI_at	NM_178822	IGSF10	immunoglobulin superfamily, member 10	9.51e-09	0.742737	0.275895	0.874003	0.325004	0.935586	1.02569	0.965521	0	0	NA	NA	NA
X100157425_TGI_at	100157425_TGI_at	BC040204			2.63e-09	0.647596	0.108405	0.863772	0.149376	0.967011	0.951039	0.980395	0	0	NA	NA	NA
X100157432_TGI_at	100157432_TGI_at	NM_001040001	MLLT4	myeloid/lymphoid or mixed-lineage leukemia (trithorax homolog, Drosophila); translocated to, 4	3.22e-11	0.829641	0.0194518	0.945667	0.0400852	0.0668422	0.939132	0.148369	0	0	NA	NA	NA
X100157458_TGI_at	100157458_TGI_at	NM_015236	LPHN3	latrophilin 3	1.52e-08	0.630951	0.445215	0.931719	0.488662	0.29165	0.85018	0.4302	0	0	NA	NA	NA
X100157462_TGI_at	100157462_TGI_at	NM_032782	HAVCR2	hepatitis A virus cellular receptor 2	8.3e-12	1.63428	0.0201092	1.21356	0.0410204	0.0209285	1.28522	0.0654244	0	0	NA	NA	NA
X100157540_TGI_at	100157540_TGI_at	BI913098			6.26e-10	0.646106	0.067036	0.816765	0.103377	0.823249	1.00378	0.889186	0	0	NA	NA	NA
X100157542_TGI_at	100157542_TGI_at	U46837	MED21	mediator complex subunit 21	2.08e-09	1.23715	0.0984351	1.06442	0.138722	0.0614509	1.15949	0.141368	0	0	NA	NA	NA
X100157547_TGI_at	100157547_TGI_at	AK091040	AMOTL2	angiomotin like 2	3.49e-07	0.812643	0.234395	0.934344	0.283048	0.672949	0.986584	0.774063	0	0	NA	NA	NA
X100157572_TGI_at	100157572_TGI_at	NM_015278	SASH1	SAM and SH3 domain containing 1	1.55e-10	0.770567	0.0707404	0.918111	0.107596	0.927501	1.00369	0.959351	0	0	NA	NA	NA
X100157584_TGI_at	100157584_TGI_at	NM_004563	PCK2	phosphoenolpyruvate carboxykinase 2 (mitochondrial)	2.01e-09	1.38826	0.0733153	1.12082	0.110339	0.00714438	1.31635	0.0318925	0	0	NA	NA	NA
X100157613_TGI_at	100157613_TGI_at	AF193058	EDC3	enhancer of mRNA decapping 3 homolog (S. cerevisiae)	1.95e-08	1.27773	0.00229347	1.11562	0.00869631	0.00459597	1.19327	0.0238532	0	1	U1	U1	U1
X100157618_TGI_at	100157618_TGI_at	NM_175872	ZNF792	zinc finger protein 792	8.93e-07	0.761274	0.206592	0.91326	0.255939	0.810392	0.941366	0.881205	0	0	NA	NA	NA
X100157619_TGI_at	100157619_TGI_at	AK074749	RDH11	retinol dehydrogenase 11 (all-trans/9-cis/11-cis)	7.88e-10	1.21606	0.50509	0.979481	0.544268	0.000863569	1.27957	0.00867067	0	0	NA	NA	NA
X100157621_TGI_at	100157621_TGI_at	BC013413	FZR1	fizzy/cell division cycle 20 related 1 (Drosophila)	3.48e-08	1.23437	0.193132	1.04038	0.241546	0.0364414	1.1555	0.0964394	0	0	NA	NA	NA
X100157638_TGI_at	100157638_TGI_at	NM_003991	EDNRB	endothelin receptor type B	3.44e-13	0.591949	0.000203591	0.757554	0.00164044	0.914366	1.09362	0.951874	0	0	NA	NA	NA
X100157653_TGI_at	100157653_TGI_at	NM_015440	MTHFD1L	methylenetetrahydrofolate dehydrogenase (NADP+ dependent) 1-like	2.58e-10	1.4385	0.00266993	1.16114	0.00964563	0.248076	1.08512	0.381464	0	0	NA	NA	NA
X100157654_TGI_at	100157654_TGI_at	BC014004	WDFY2	WD repeat and FYVE domain containing 2	8.92e-10	1.21839	0.0132571	1.07979	0.0300475	0.87511	1.02941	0.925961	0	0	NA	NA	NA
X100157672_TGI_at	100157672_TGI_at	NM_001040058	SPP1	secreted phosphoprotein 1	5.99e-09	3.2866	0.00866158	1.8206	0.0222795	0.563623	0.865065	0.691231	0	0	NA	NA	NA
X100157692_TGI_at	100157692_TGI_at	NM_006702	PNPLA6	patatin-like phospholipase domain containing 6	5.54e-10	1.51811	0.0160545	1.16448	0.0346806	0.0414152	1.31521	0.104282	0	0	NA	NA	NA
X100157718_TGI_at	100157718_TGI_at	NM_015704	FAM152B	family with sequence similarity 152, member B	7.02e-14	1.47169	0.0641462	1.09725	0.0994436	6.87e-05	1.41904	0.00257588	0	0	NA	NA	NA
X100157730_TGI_at	100157730_TGI_at	NM_005725	TSPAN2	tetraspanin 2	5.73e-08	0.693001	0.0532777	0.839252	0.0856428	0.131303	0.765135	0.240586	0	0	NA	NA	NA
X100157741_TGI_at	100157741_TGI_at	NM_003312	TST	thiosulfate sulfurtransferase (rhodanese)	1.16e-08	1.22176	0.0464221	1.1091	0.0768983	0.0153743	1.33153	0.0529599	0	0	NA	NA	NA
X100157800_TGI_at	100157800_TGI_at	NM_001082578	RBM9	RNA binding motif protein 9	2.07e-10	0.818231	0.166579	0.940183	0.212376	0.103905	0.918121	0.203577	0	0	NA	NA	NA
X100157806_TGI_at	100157806_TGI_at	NM_032152	PRAM1	PML-RARA regulated adaptor molecule 1	1.92e-14	1.96702	0.000279938	1.30048	0.00202296	0.00105544	1.63934	0.00971913	0	1	U2	U1	U1
X100157821_TGI_at	100157821_TGI_at	NM_178834	LAYN	layilin	1.01e-06	0.77872	0.00546305	0.856483	0.0160067	0.00053236	0.772068	0.0066493	0	1	D1	D1	D1
X100157831_TGI_at	100157831_TGI_at	AK023623	GLDN	gliomedin	2.28e-10	1.43702	0.763634	1.01847	0.784568	0.0899872	1.21915	0.184145	0	0	NA	NA	NA
X100157851_TGI_at	100157851_TGI_at	BF846660	LAMC2	laminin, gamma 2	5.15e-07	0.795716	0.0957576	0.849104	0.13572	0.365926	1.10405	0.503363	0	0	NA	NA	NA
X100157859_TGI_at	100157859_TGI_at	ENST00000389980	SPTBN1	spectrin, beta, non-erythrocytic 1	1.54e-12	0.757953	0.00519022	0.893148	0.015489	0.540576	1.08908	0.670622	0	0	NA	NA	NA
X100157872_TGI_at	100157872_TGI_at	NM_001085384	ZNF154	zinc finger protein 154	1.23e-06	0.803533	0.0957346	0.893245	0.13572	0.491674	1.0545	0.62759	0	0	NA	NA	NA
X100157899_TGI_at	100157899_TGI_at	NM_000218	KCNQ1	potassium voltage-gated channel, KQT-like subfamily, member 1	9.49e-08	1.2585	0.0245091	1.10745	0.0475288	0.0209285	1.30503	0.0654244	0	0	NA	NA	NA
X100157910_TGI_at	100157910_TGI_at	NM_153811	SLC38A6	solute carrier family 38, member 6	1.9e-14	1.74965	8.2e-06	1.31232	0.000250205	0.0320831	1.21065	0.0883194	0	0	NA	NA	NA
X100157914_TGI_at	100157914_TGI_at	S75295	KPNA1	karyopherin alpha 1 (importin alpha 5)	1.08e-08	1.20672	0.0083236	1.08608	0.0217047	0.647961	1.05468	0.755322	0	0	NA	NA	NA
X100157920_TGI_at	100157920_TGI_at	NM_021643	TRIB2	tribbles homolog 2 (Drosophila)	8.75e-11	0.799344	0.645826	0.984648	0.677791	0.0155445	0.847879	0.0529599	0	0	NA	NA	NA
X100157922_TGI_at	100157922_TGI_at	AK000276		hypothetical protein LOC283859	2.27e-09	0.677023	0.000307111	0.801393	0.00215178	0.0776894	0.768783	0.166153	0	0	NA	NA	NA
X100157939_TGI_at	100157939_TGI_at	AF075030			1.37e-07	0.705834	0.00181504	0.745164	0.007499	0.295661	0.832366	0.435718	0	0	NA	NA	NA
X100157966_TGI_at	100157966_TGI_at	AL833615			9.16e-07	0.77319	0.0019621	0.828753	0.00790483	0.402347	0.909513	0.542113	0	0	NA	NA	NA
X100157975_TGI_at	100157975_TGI_at	AA453470			2.68e-07	1.31474	7.04e-06	1.25669	0.000226851	0.938243	1.00967	0.965521	0	0	NA	NA	NA
X100157979_TGI_at	100157979_TGI_at	NM_021173	POLD4	polymerase (DNA-directed), delta 4	1.9e-09	1.26352	0.227763	1.04089	0.276582	0.000923705	1.26514	0.00896717	0	0	NA	NA	NA
X100158003_TGI_at	100158003_TGI_at	AF190461	FAIM2	Fas apoptotic inhibitory molecule 2	8.71e-07	1.66835	0.236636	1.14895	0.285647	0.953827	0.993521	0.974385	0	0	NA	NA	NA
X100158020_TGI_at	100158020_TGI_at	BX106890	ITGA8	integrin, alpha 8	7.04e-08	0.78774	0.993207	0.995114	0.994132	0.902152	0.984025	0.945572	0	0	NA	NA	NA
X100158022_TGI_at	100158022_TGI_at	NM_014988	LIMCH1	LIM and calponin homology domains 1	1.32e-09	0.803539	0.0753216	0.934001	0.11239	0.55201	1.07585	0.680615	0	0	NA	NA	NA
X100158049_TGI_at	100158049_TGI_at	AL157484			1.09e-06	0.770091	0.0638876	0.875564	0.0990904	0.0319308	1.45621	0.0883194	0	0	NA	NA	NA
X100158062_TGI_at	100158062_TGI_at	NM_003874	CD84	CD84 molecule	3.71e-10	1.79952	0.0911971	1.1902	0.131159	0.344082	1.14519	0.485967	0	0	NA	NA	NA
X100158077_TGI_at	100158077_TGI_at	NM_001039350	DPP6	dipeptidyl-peptidase 6	2e-18	0.212753	0.000158506	0.564936	0.00137329	0.33998	0.739508	0.480594	0	0	NA	NA	NA
X100158134_TGI_at	100158134_TGI_at	NM_020844	C8orf79	chromosome 8 open reading frame 79	4.2e-07	0.781983	0.196359	0.925245	0.245012	0.053766	0.826525	0.127699	0	0	NA	NA	NA
X100158135_TGI_at	100158135_TGI_at	NM_030923	TMEM163	transmembrane protein 163	3.89e-08	1.30924	0.0726668	1.14704	0.109698	0.000104771	1.98951	0.00328403	0	0	NA	NA	NA
X100158139_TGI_at	100158139_TGI_at	AK026611	SOAT1	sterol O-acyltransferase 1	1.32e-10	1.6639	0.00292393	1.21845	0.0102993	0.241272	1.28631	0.374576	0	0	NA	NA	NA
X100158195_TGI_at	100158195_TGI_at	NM_007268	VSIG4	V-set and immunoglobulin domain containing 4	1.24e-15	1.83231	0.00668499	1.28873	0.0185419	0.000695763	1.68318	0.007706	0	1	U2	U1	U1
X100158212_TGI_at	100158212_TGI_at	NM_001080398	KIAA0368	KIAA0368	9.96e-08	0.772061	0.00500424	0.87871	0.0151301	0.221636	0.901925	0.351888	0	0	NA	NA	NA
X100158226_TGI_at	100158226_TGI_at	NM_001033503	SAR1B	SAR1 homolog B (S. cerevisiae)	1.27e-12	1.31478	0.124699	1.05262	0.16753	0.819787	0.989935	0.887827	0	0	NA	NA	NA
X100158231_TGI_at	100158231_TGI_at	NM_004313	ARRB2	arrestin, beta 2	4.92e-11	1.36334	0.0417248	1.09519	0.0706297	0.00252256	1.27368	0.0167633	0	0	NA	NA	NA
X100158249_TGI_at	100158249_TGI_at	NM_021219	JAM2	junctional adhesion molecule 2	2.48e-09	0.768288	0.0614522	0.934513	0.0960874	0.0192929	0.813911	0.0618101	0	0	NA	NA	NA
X100158252_TGI_at	100158252_TGI_at	NM_014772	KIAA0427	KIAA0427	2.02e-09	0.792388	0.000352894	0.861856	0.00236954	0.383639	1.07127	0.520942	0	0	NA	NA	NA
X100158255_TGI_at	100158255_TGI_at	NM_005501	ITGA3	integrin, alpha 3 (antigen CD49C, alpha 3 subunit of VLA-3 receptor)	1.85e-08	0.772961	0.00216024	0.812549	0.00841892	0.985988	1.03823	0.992454	0	0	NA	NA	NA
X100158305_TGI_at	100158305_TGI_at	NM_000952	PTAFR	platelet-activating factor receptor	7.77e-13	1.67695	0.0532777	1.17663	0.0856428	0.000211783	1.57252	0.00427298	0	0	NA	NA	NA
X100158335_TGI_at	100158335_TGI_at	ENST00000293217	ACOX1	acyl-Coenzyme A oxidase 1, palmitoyl	8.14e-10	1.3346	0.00369309	1.14933	0.0121581	0.00791841	1.24009	0.0343414	0	1	U1	U1	U1
X100158342_TGI_at	100158342_TGI_at	ENST00000373857	PTAFR	platelet-activating factor receptor	4.74e-13	1.69474	0.00261255	1.19853	0.00948227	2.27e-06	1.76559	0.000730441	0	1	U5	U1	U1
X100158367_TGI_at	100158367_TGI_at	BM998468			1.48e-07	0.738837	0.523119	0.951135	0.56163	0.00543765	0.663645	0.0261966	0	0	NA	NA	NA
X100158420_TGI_at	100158420_TGI_at	NM_015472	WWTR1	WW domain containing transcription regulator 1	9.75e-08	1.40678	6.16e-05	1.27673	0.000775394	0.0257168	1.28291	0.0754876	0	0	NA	NA	NA
X100158427_TGI_at	100158427_TGI_at	NM_004591	CCL20	chemokine (C-C motif) ligand 20	8.09e-07	2.87935	0.00065342	2.44664	0.00367535	0.000371641	3.24655	0.00537129	0	1	U2	U3	U1
X100158502_TGI_at	100158502_TGI_at	BC020746	PNPLA4	patatin-like phospholipase domain containing 4	3.92e-12	1.24326	0.0242016	1.0638	0.0470457	0.979809	1.03121	0.987557	0	0	NA	NA	NA
X100158512_TGI_at	100158512_TGI_at	NM_024940	DOCK5	dedicator of cytokinesis 5	7.18e-07	1.28466	0.0503363	1.11529	0.0820606	0.579048	1.06182	0.700553	0	0	NA	NA	NA
X100158515_TGI_at	100158515_TGI_at	BC035691	GSR	glutathione reductase	4.2e-10	1.27036	0.00392686	1.10669	0.0126563	0.00438649	1.17776	0.0229881	0	1	U2	U1	U1
X100158516_TGI_at	100158516_TGI_at	BM146612	AIM1	absent in melanoma 1	1.16e-07	1.21987	0.12751	1.09016	0.170666	0.00979779	1.32264	0.039468	0	0	NA	NA	NA
X100158532_TGI_at	100158532_TGI_at	ENST00000377922	PCDH17	protocadherin 17	3.25e-09	0.674632	3.14e-05	0.691845	0.000508004	0.0250212	0.722119	0.0741888	0	0	NA	NA	NA
X100158556_TGI_at	100158556_TGI_at	CB306881	KIAA1377	KIAA1377	1.46e-10	0.716069	0.000945553	0.730125	0.0046456	0.00155839	0.718848	0.0123712	0	1	D3	D2	D1
X100158578_TGI_at	100158578_TGI_at	NM_000875	IGF1R	insulin-like growth factor 1 receptor	5.78e-11	0.76736	0.00866158	0.897719	0.0222795	0.118794	0.899368	0.224033	0	0	NA	NA	NA
X100158631_TGI_at	100158631_TGI_at	AI221753			1.3e-12	1.6595	2.77e-05	1.44914	0.000479188	0.127936	1.16834	0.236568	0	0	NA	NA	NA
X100158641_TGI_at	100158641_TGI_at	AI380960	PCDH17	protocadherin 17	6.61e-07	0.686567	0.007539	0.792845	0.0201623	0.212464	0.797883	0.341532	0	0	NA	NA	NA
X100158656_TGI_at	100158656_TGI_at	NM_139177	SLC39A11	solute carrier family 39 (metal ion transporter), member 11	3.45e-12	1.35965	0.0103707	1.10485	0.0252452	0.0126269	1.17775	0.0464474	0	1	U2	U1	U1
X100158670_TGI_at	100158670_TGI_at	M74777	DPP4	dipeptidyl-peptidase 4	5.15e-09	1.58747	0.0120162	1.26366	0.0279829	0.00410091	1.91078	0.0220655	0	1	U8	U1	U1
X100158697_TGI_at	100158697_TGI_at	NM_152605	ZNF781	zinc finger protein 781	1.23e-06	0.717379	0.0439481	0.906956	0.0736199	0.0836159	0.771141	0.17511	0	0	NA	NA	NA
X100158698_TGI_at	100158698_TGI_at	NM_016242	EMCN	endomucin	1.14e-14	0.628447	0.0027001	0.820016	0.00973047	0.154337	0.850543	0.270635	0	0	NA	NA	NA
X100158699_TGI_at	100158699_TGI_at	U90920	ARHGAP29	Rho GTPase activating protein 29	1.28e-08	0.716821	0.0210394	0.880877	0.0424875	0.118794	0.88219	0.224033	0	0	NA	NA	NA
X100158717_TGI_at	100158717_TGI_at	L40377	SERPINB8	serpin peptidase inhibitor, clade B (ovalbumin), member 8	3.15e-09	1.5553	0.549465	1.04911	0.5864	0.0694323	1.21761	0.153169	0	0	NA	NA	NA
X100158718_TGI_at	100158718_TGI_at	U51127	IRF5	interferon regulatory factor 5	5.86e-07	1.60123	0.0132286	1.28532	0.0300475	0.144787	1.22328	0.258531	0	0	NA	NA	NA
X100158735_TGI_at	100158735_TGI_at	NM_003573	LTBP4	latent transforming growth factor beta binding protein 4	4.92e-09	0.674841	0.0107309	0.824134	0.0258487	0.0367732	0.827003	0.0969886	0	0	NA	NA	NA
[truncated: 1,224 more rows]
